# Supplementary material for: Solid state coordination chemistry of oxomolybdenum–organodiphosphonate materials: consequences of introducing xylyldiphosphonate components
Source: Royal Society of Chemistry journal article supplement (doi:10.1039/c3ce41728j), 2013-10-09
Supplement: c3ce41728j.pdf [file c3ce41728j.pdf]

## Supplementary Materials

Solid State Coordination Chemistry of Oxomolybdenum-Organodiphosphonate Materials:  
Consequences of Introducing Xylyldiphosphonate Components.

Tiffany M. Smith, Kathryn Perrin, Diona Symester, Steve R. Freund, Jose Vargas,

Leonard Spinu and Jon Zubieta

**Figures S1-S14.** ORTEP views of the building units of the compounds of this study, showing the partial atom-labeling schemes and 50% thermal ellipsoids.

**Figures S15-S28.** Packing views of the compounds of this study.

**Figures S29-S42.** Infrared spectra for the compounds of this study.

**Figures S43-S56.** TGA plots for the compounds of this study.

**Figures S57-60.** Temperature dependent magnetic susceptibility plots for compounds **5**, **14**, **10** and **12**, respectively.

**Tables S1-S109.** Tables of crystal data, atomic positional parameters and isotropic temperature factors, bond lengths and angles, anisotropic temperature factors, and hydrogen atom positions for the compounds of this study.

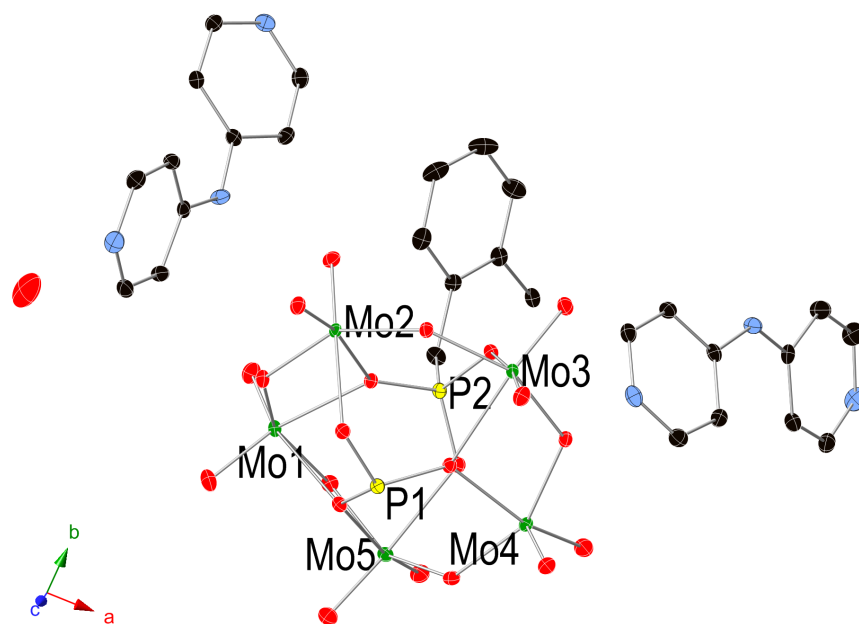

**Figure S1.** ORTEP view of compound 1·H<sub>2</sub>O, showing the atom-labeling scheme and 50% thermal ellipsoids.

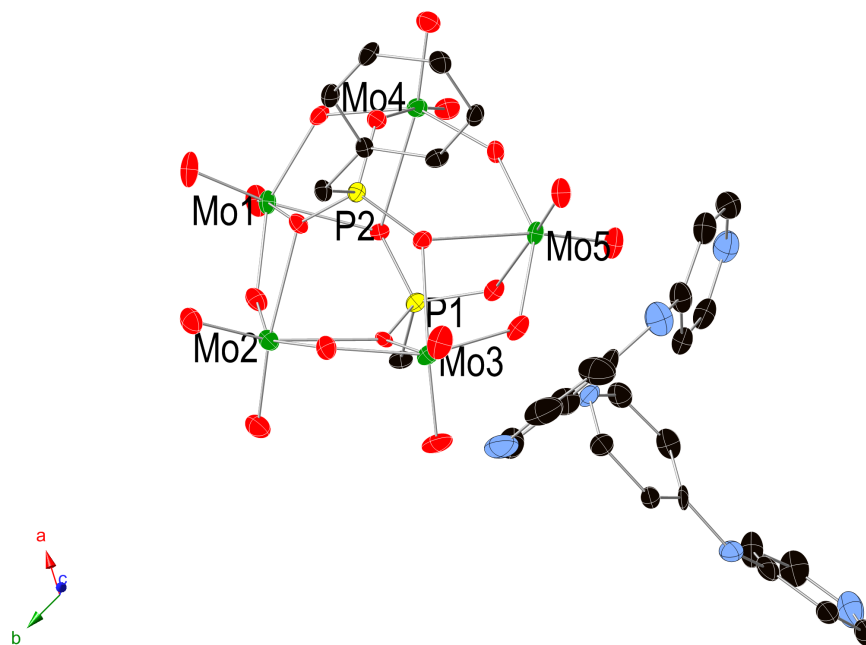

**Figure S2.** ORTEP view of compound 2, showing the atom-labeling scheme and 50% thermal ellipsoids.

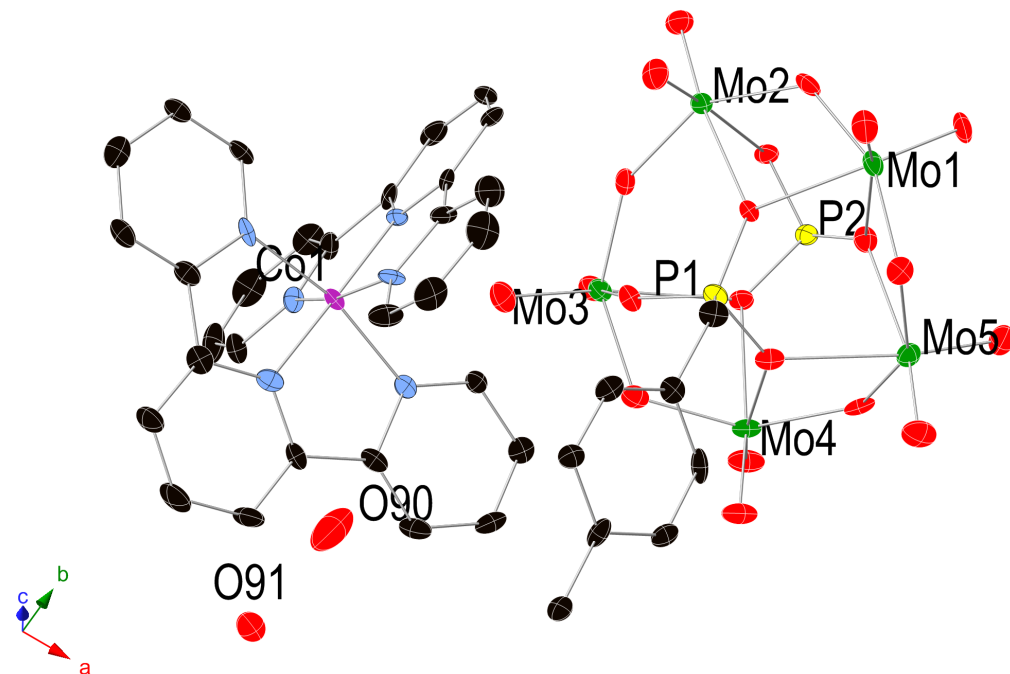

**Figure S3.** ORTEP view of compound 3·H<sub>2</sub>O, showing the atom-labeling scheme and 50% thermal ellipsoids.

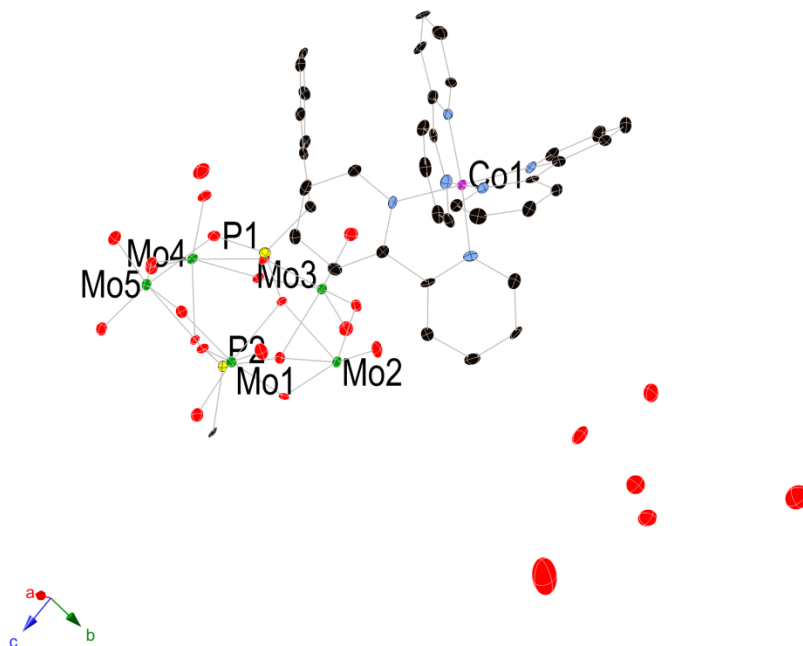

**Figure S4.** ORTEP view of compound 4·6H<sub>2</sub>O, showing the atom-labeling scheme and 50% thermal ellipsoids.

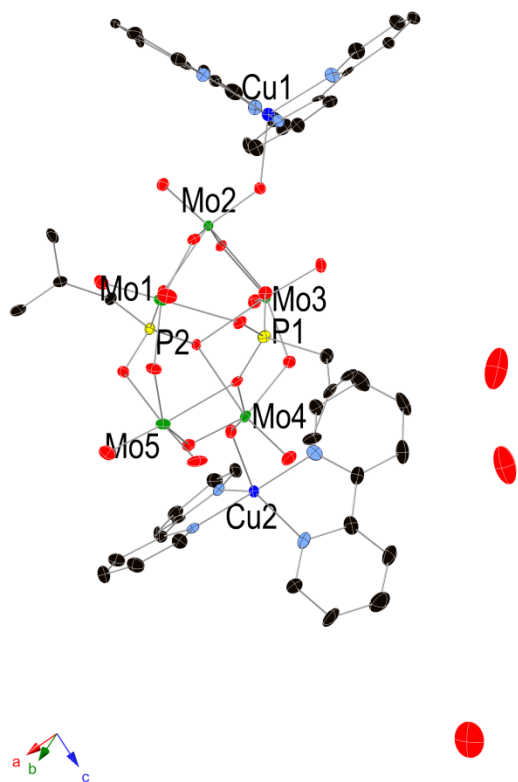

**Figure S5.** ORTEP view of compound 5·6H<sub>2</sub>O, showing the atom-labeling scheme and 50% thermal ellipsoids.

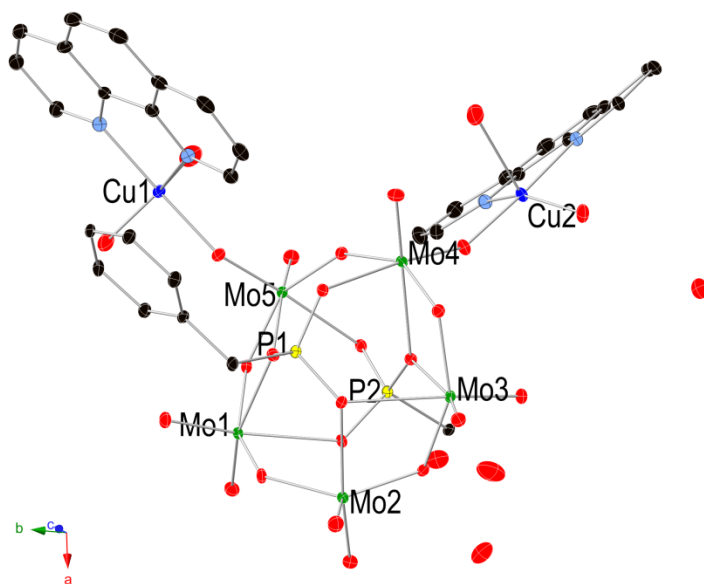

**Figure S6.** ORTEP view of compound 6·4H<sub>2</sub>O, showing the atom-labeling scheme and 50% thermal ellipsoids.



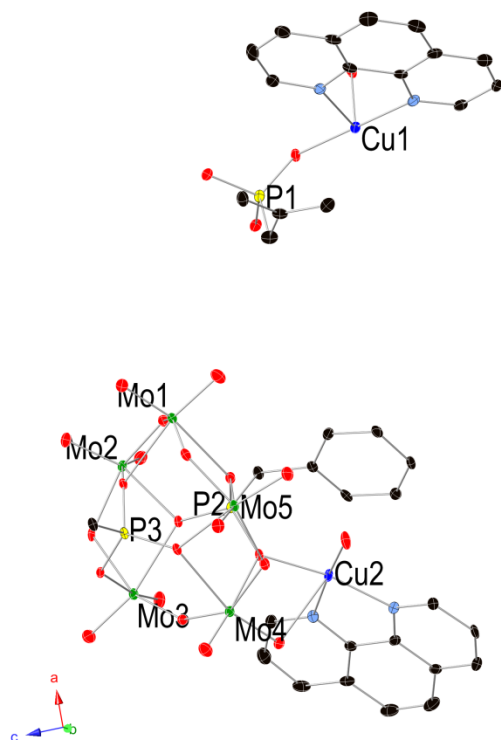

**Figure S7.** ORTEP view of compound 7, showing the atom-labeling scheme and 50% thermal ellipsoids.

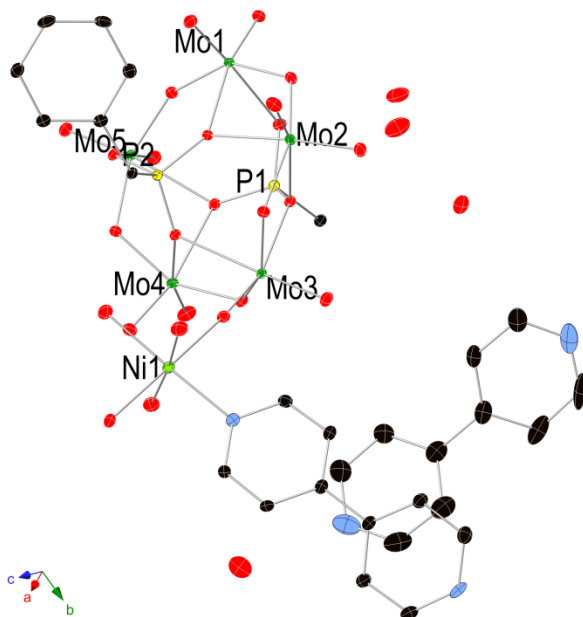

**Figure S8.** ORTEP view of compound 8·4H<sub>2</sub>O, showing the atom-labeling scheme and 50% thermal ellipsoids.

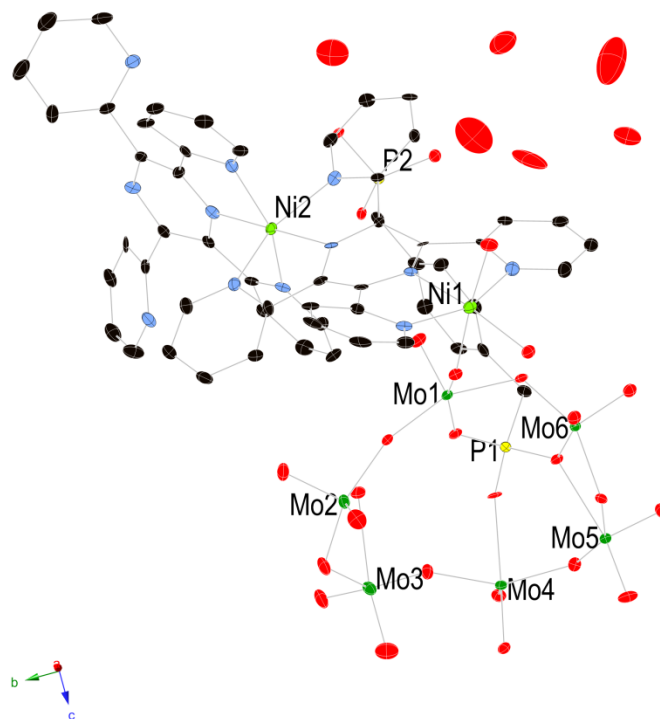

**Figure S9.** ORTEP view of compound **9**·6H<sub>2</sub>O, showing the atom-labeling scheme and 50% thermal ellipsoids.

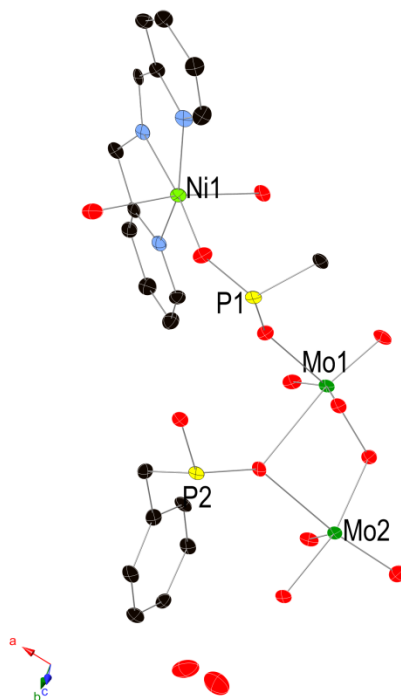

**Figure S10.** ORTEP view of compound **10**·4H<sub>2</sub>O, showing the atom-labeling scheme and 50% thermal ellipsoids.

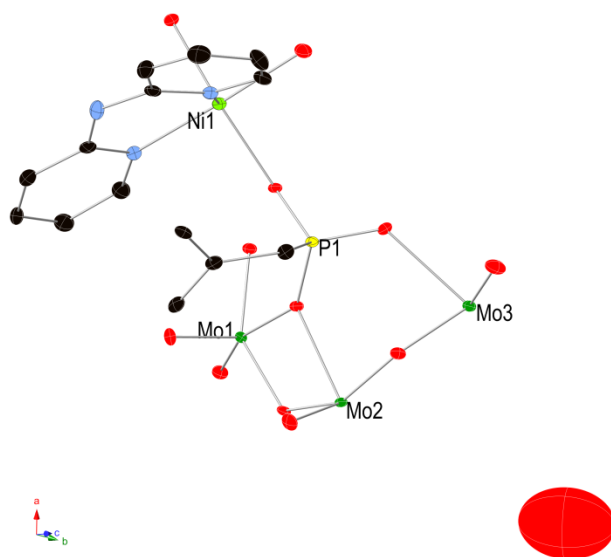

**Figure S11.** ORTEP view of compound 11·2H<sub>2</sub>O, showing the atom-labeling scheme and 50% thermal ellipsoids.

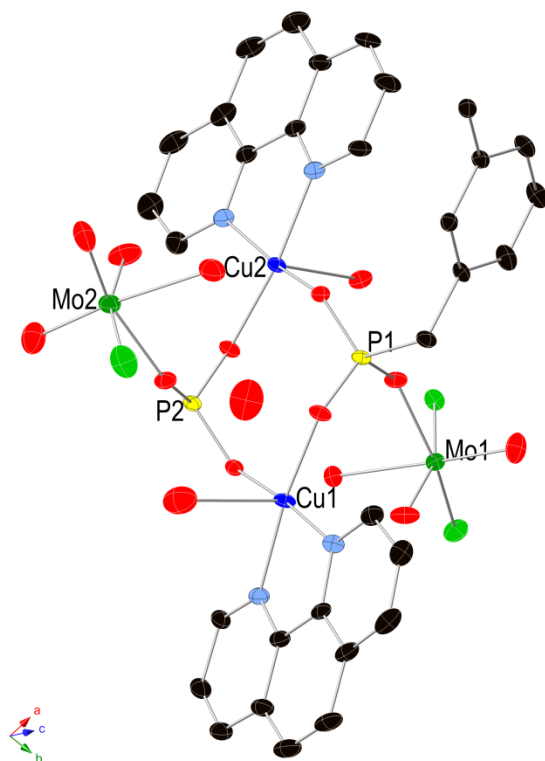

**Figure S12.** ORTEP view of compound 12·H<sub>2</sub>O, showing the atom-labeling scheme and 50% thermal ellipsoids.

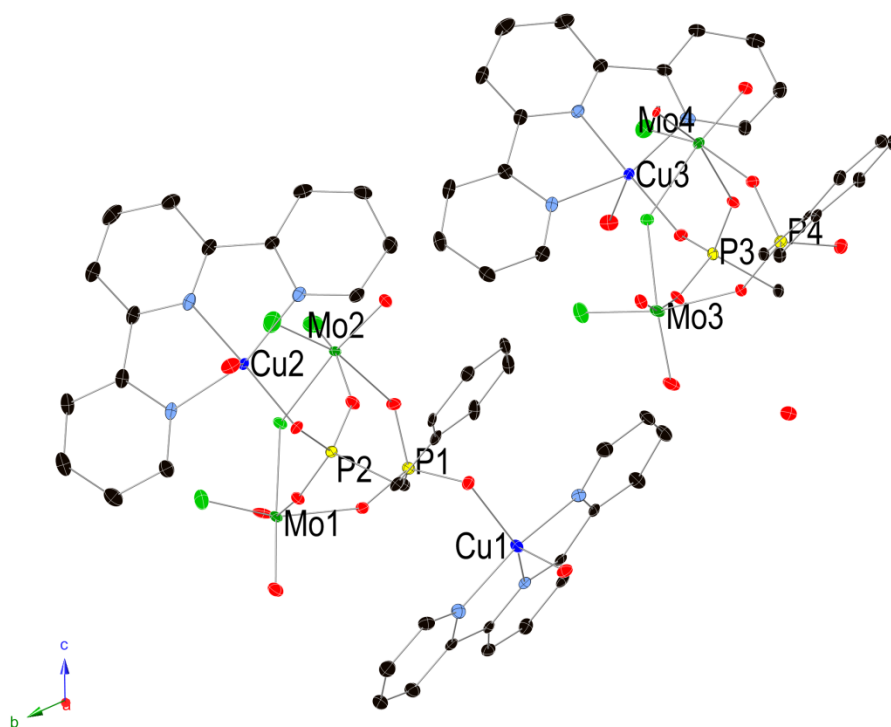

**Figure S13.** ORTEP view of compound 13·H<sub>2</sub>O, showing the atom-labeling scheme and 50% thermal ellipsoids.

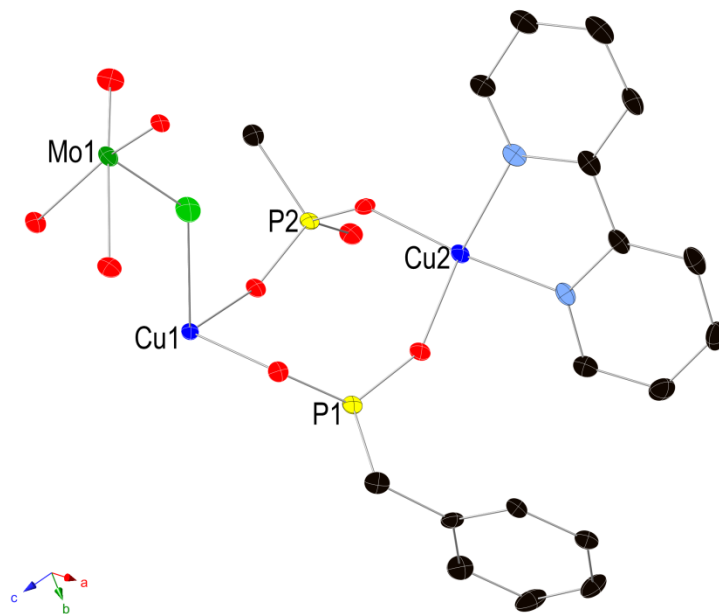

**Figure S14.** ORTEP view of compound 14, showing the atom-labeling scheme and 50% thermal ellipsoids.

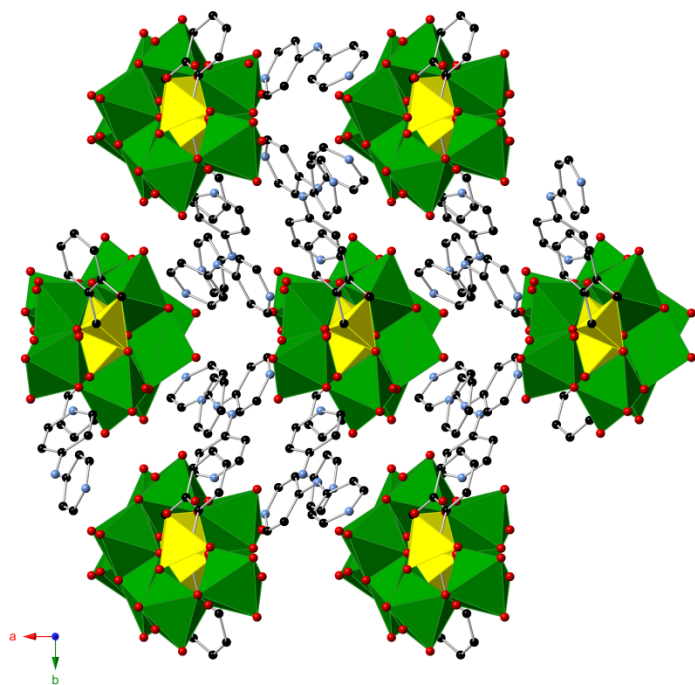

(a)

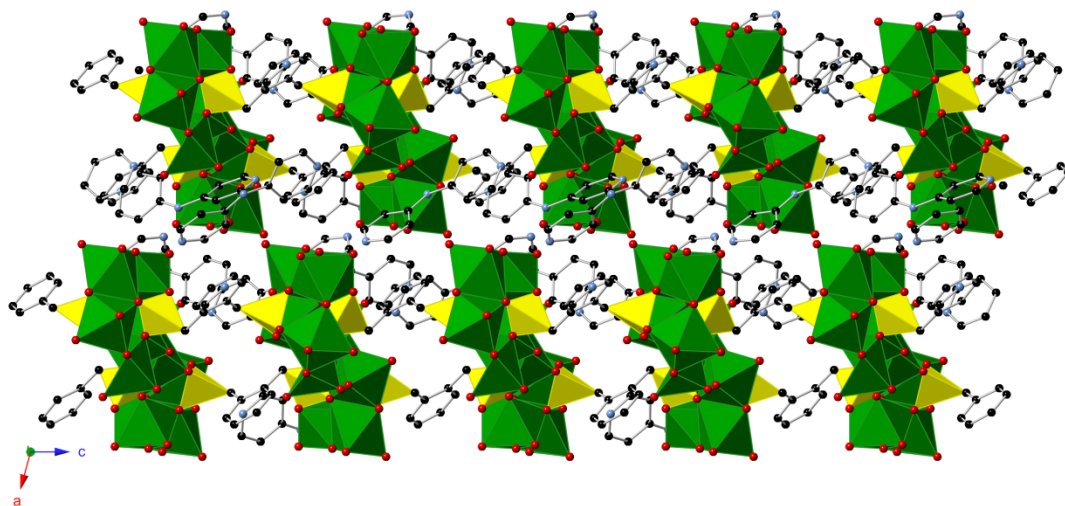

(b)

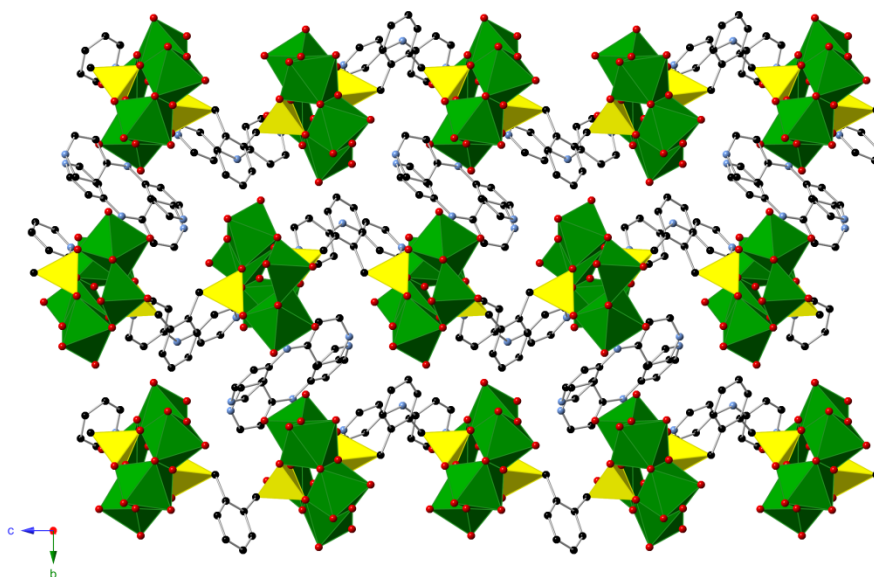

(c)

**Figure S15.** Packing view of  $1 \cdot \text{H}_2\text{O}$  in the (a) *ab* plane (b) *ac* plane and (c) *bc* plane. Water molecules of crystallization removed for clarity.

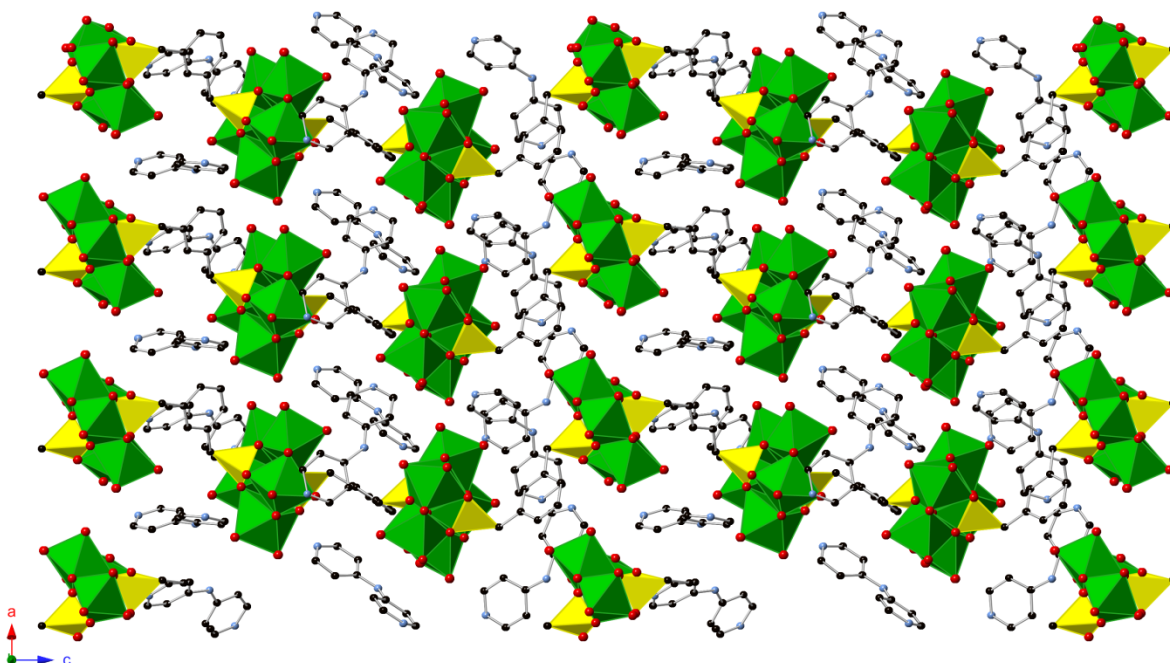

(a)

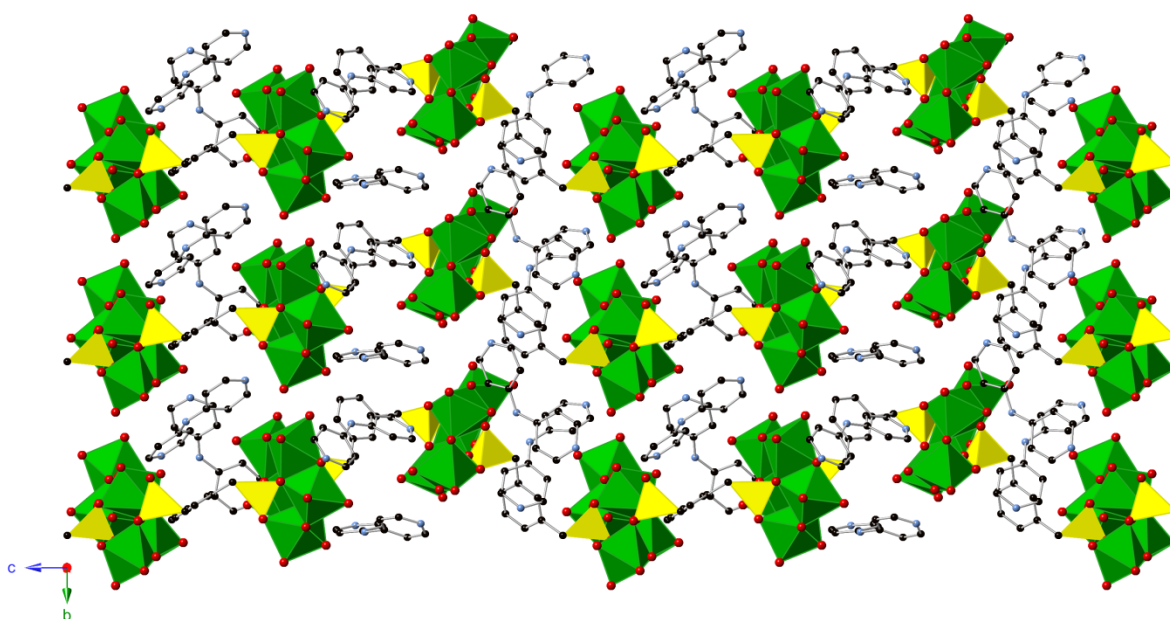

(b)

**Figure S16.** Packing view of **2** in the (a) *ac* plane and (b) *bc* plane.



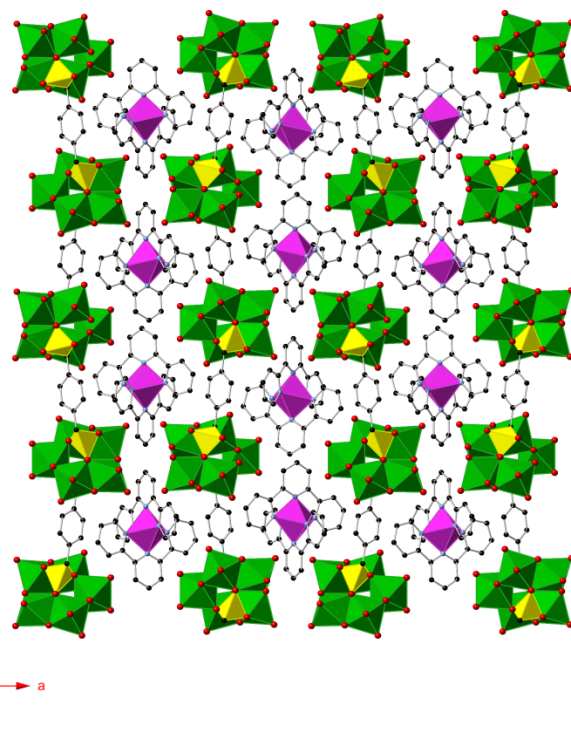

(a)

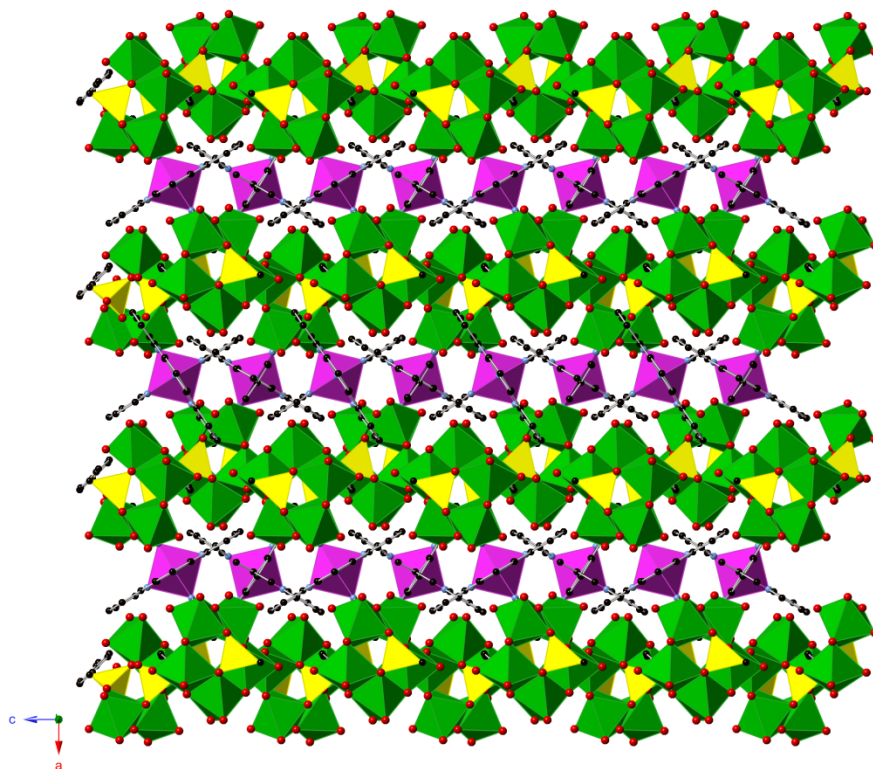

(b)



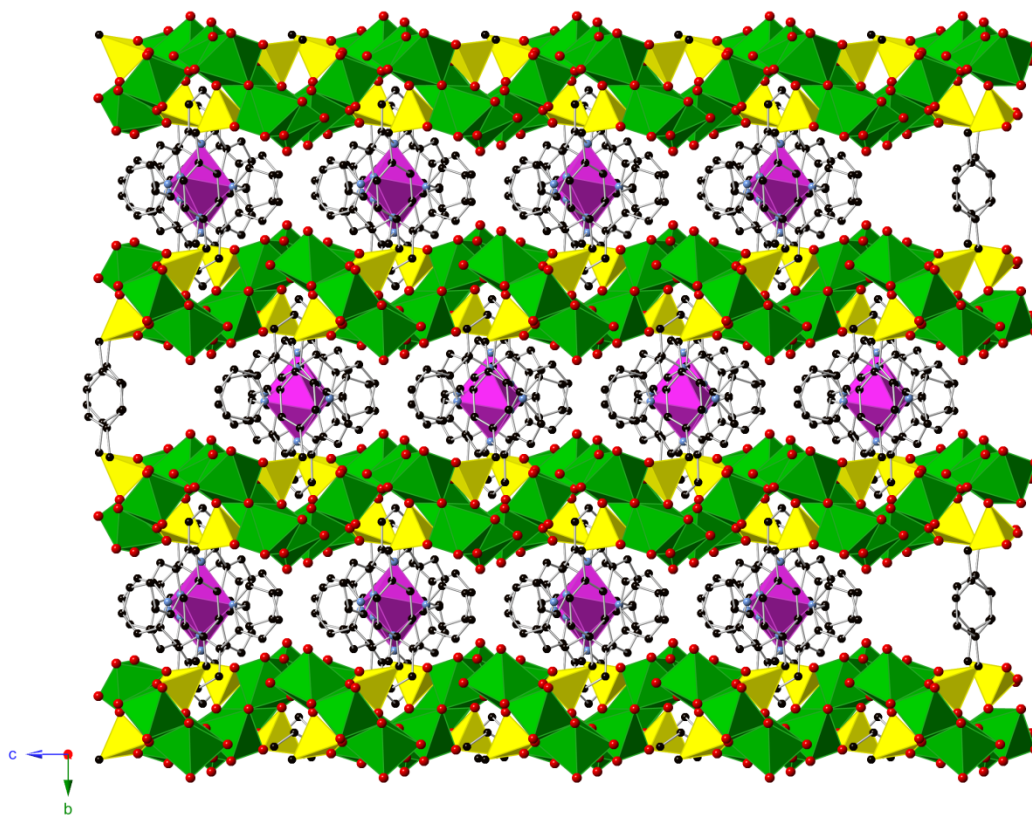

(c)

**Figure S17.** Packing view of  $3 \cdot \text{H}_2\text{O}$  in the (a) *ab* plane (b) *ac* plane and (c) *bc* plane. Water molecules of crystallization removed for clarity.

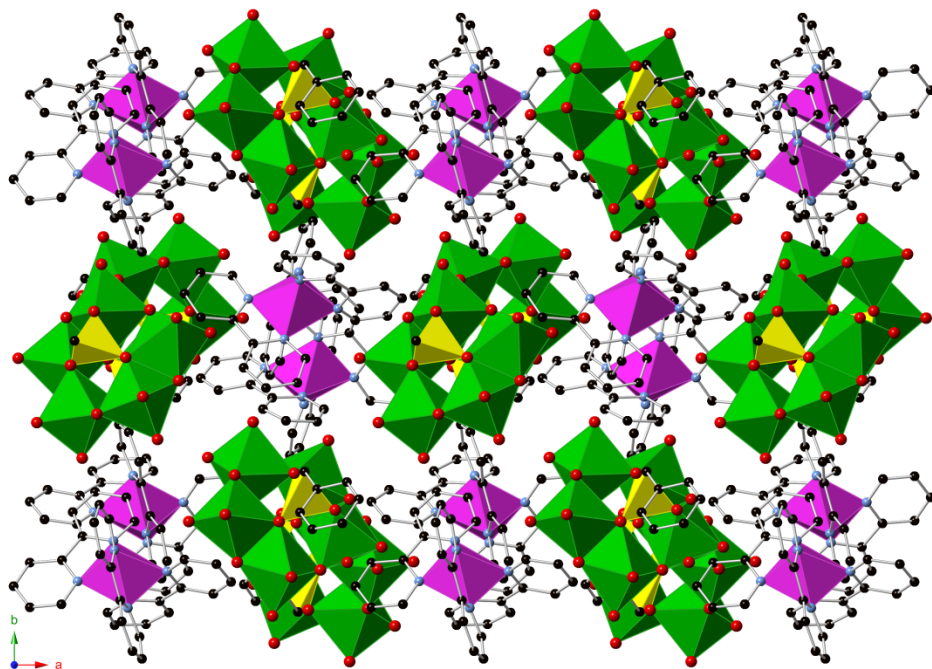

(a)

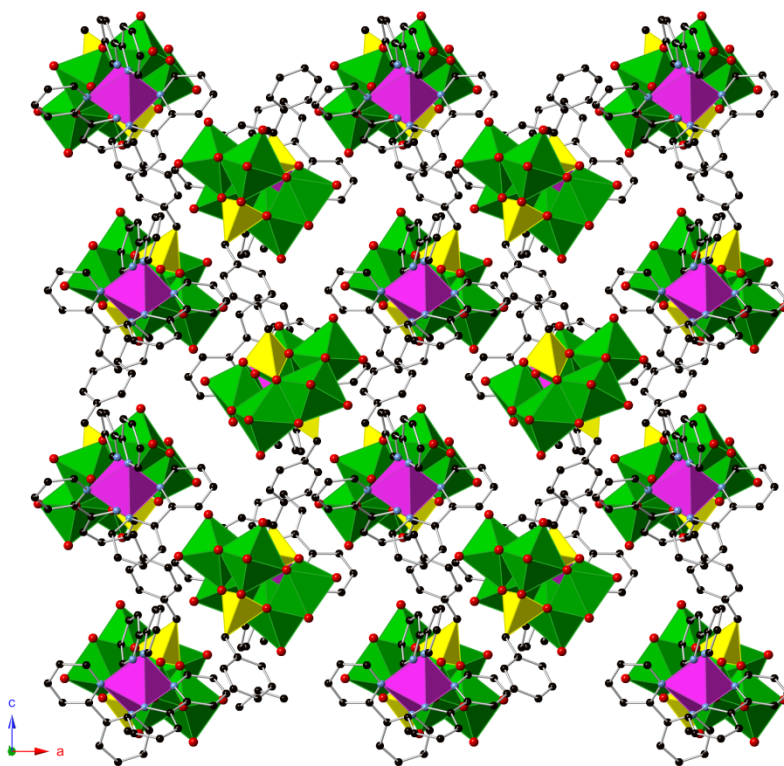

(b)

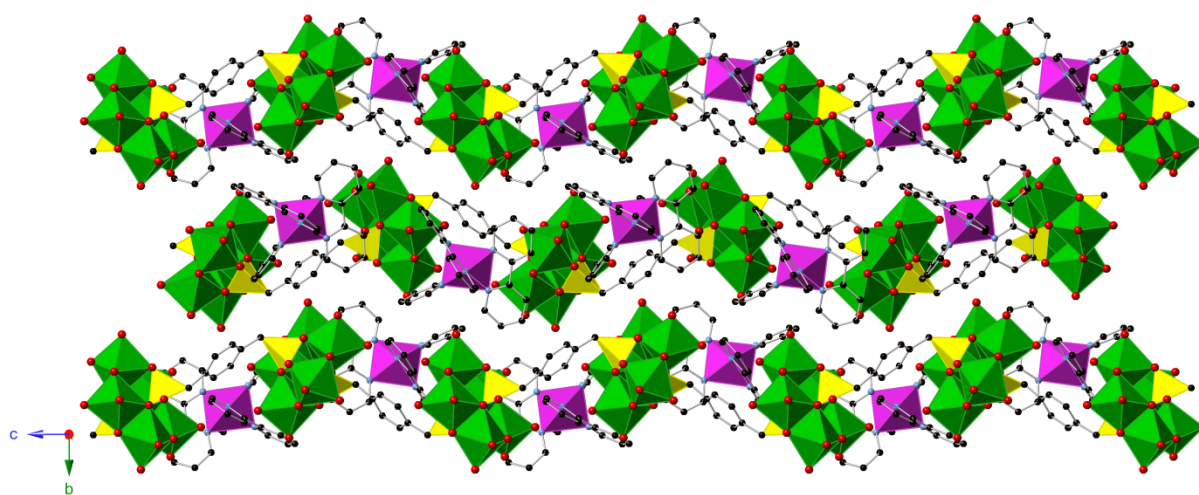

(c)

**Figure S18.** Packing view of  $4 \cdot 6\text{H}_2\text{O}$  in the (a) *ab* plane (b) *ac* plane and (c) *bc* plane. Water molecules of crystallization removed for clarity.

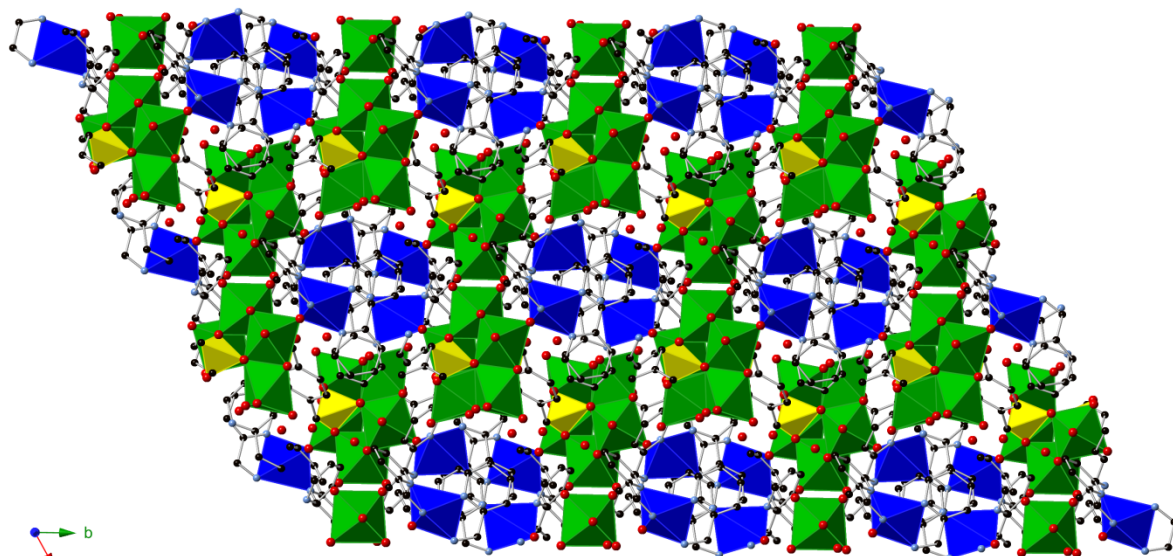

(a)

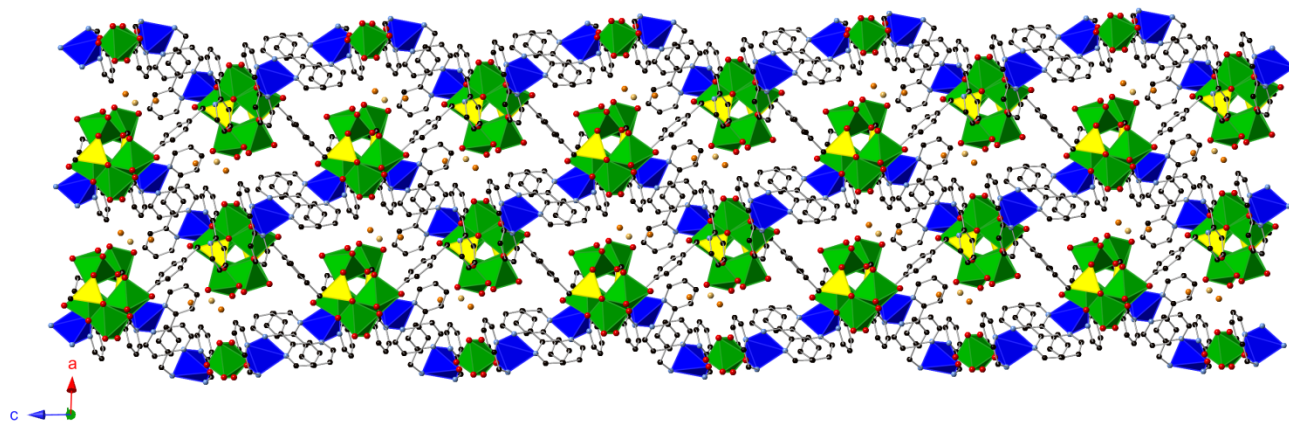

(b)



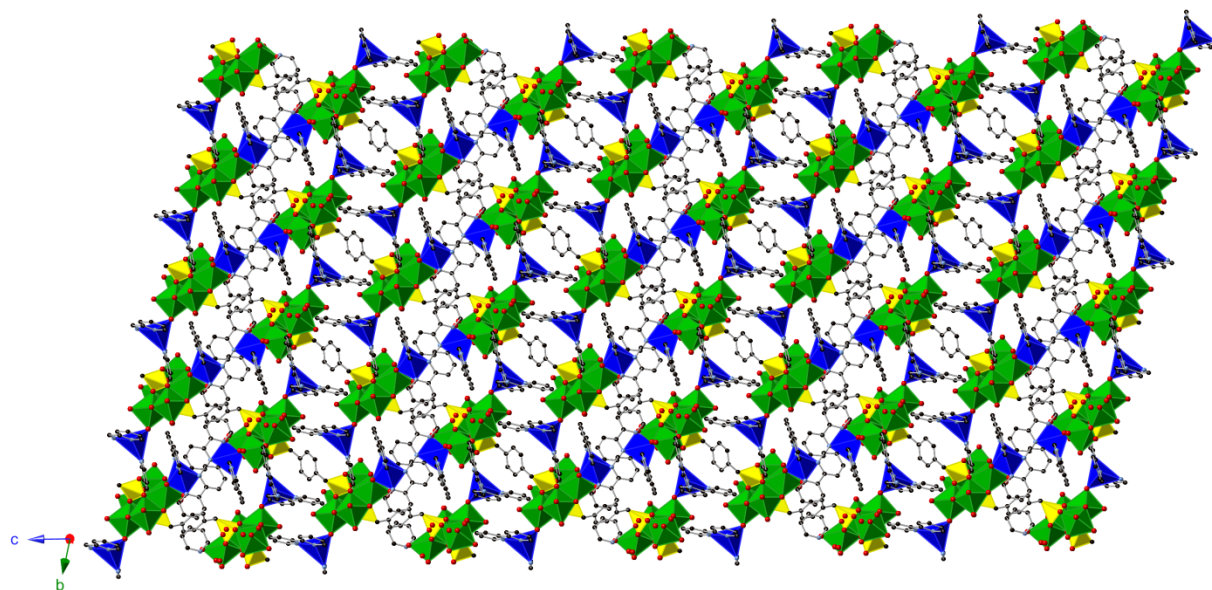

(c)

**Figure S19** Packing view of  $5 \cdot 6\text{H}_2\text{O}$  in the (a) *ab* plane (b) *ac* plane (orange spheres: water molecules of crystallization) and (c) *bc* plane. Water molecules of crystallization are removed for clarity unless otherwise noted.

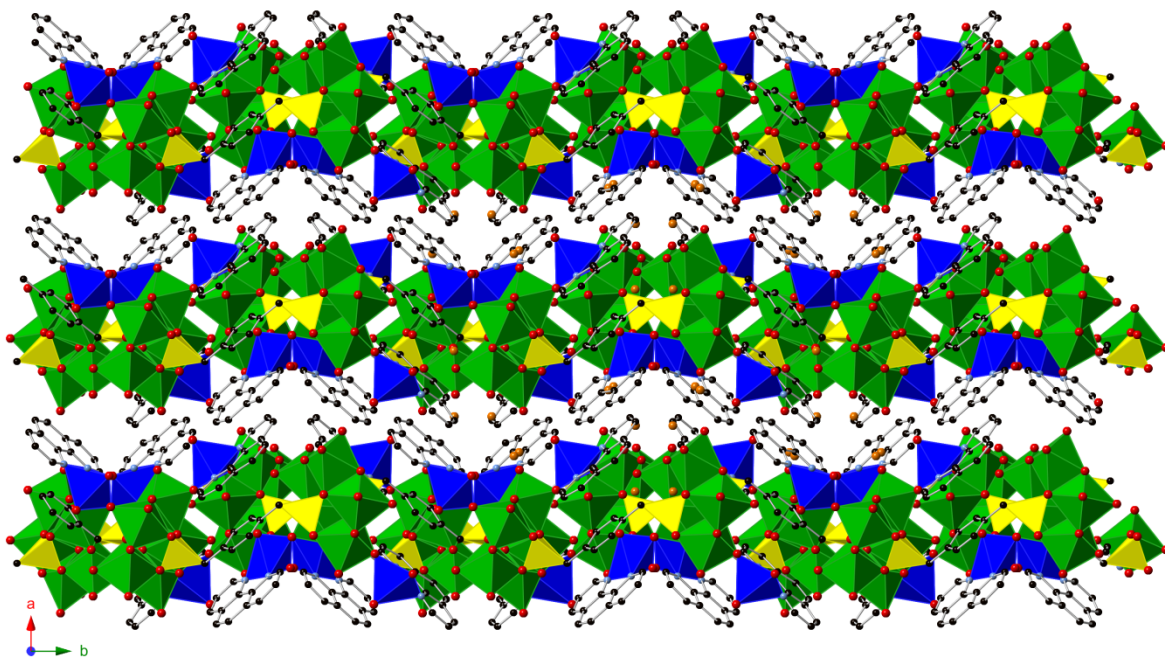

(a)

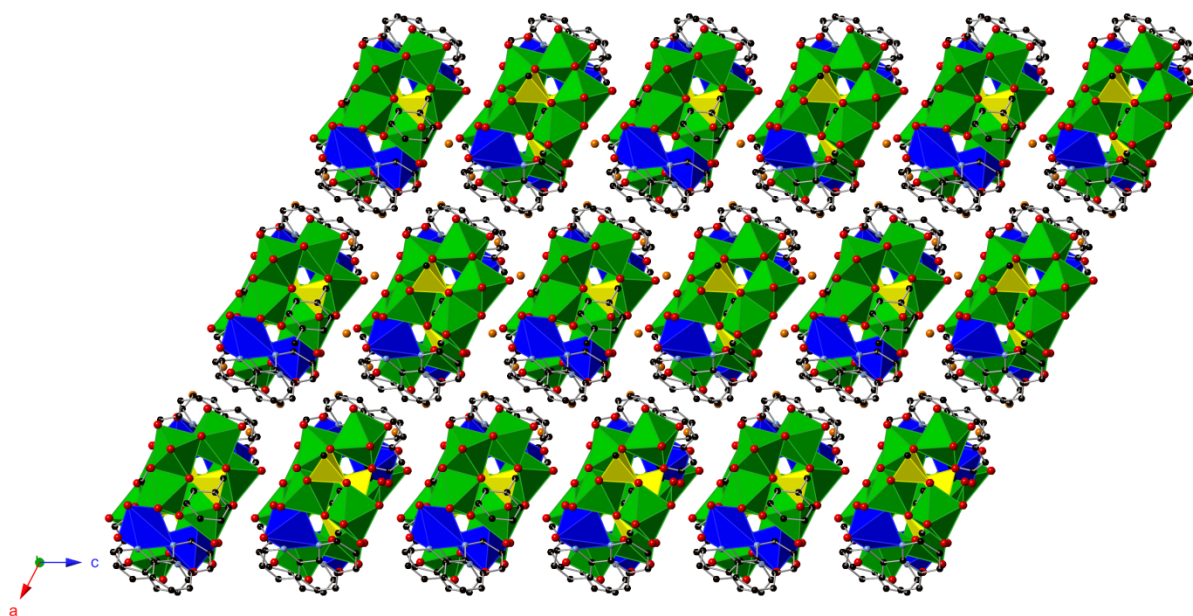

(b)

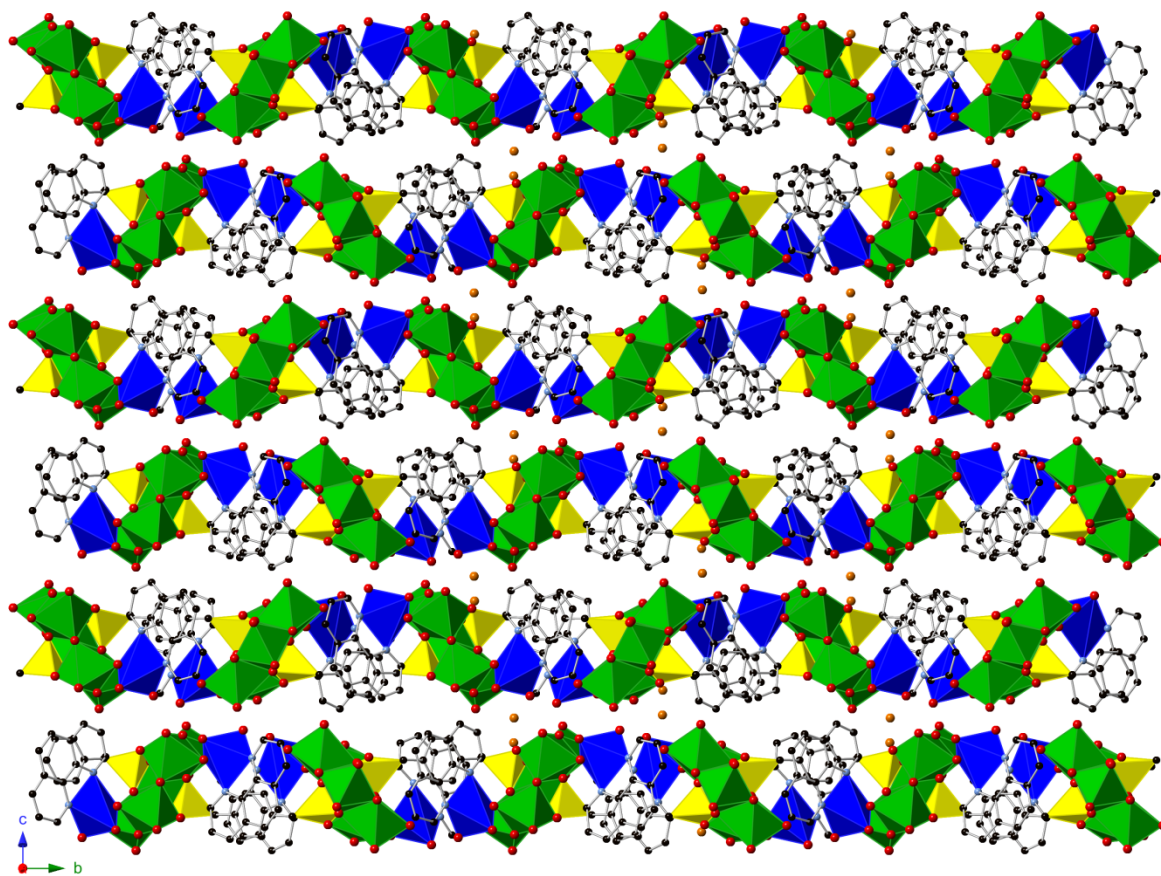

(c)

**Figure S20.** Packing view of  $6 \cdot 4\text{H}_2\text{O}$  Packing view of  $5 \cdot 6\text{H}_2\text{O}$  in the (a) *ab* plane (b) *ac* plane and (c) *bc* plane. Water molecules of crystallization are removed for clarity.



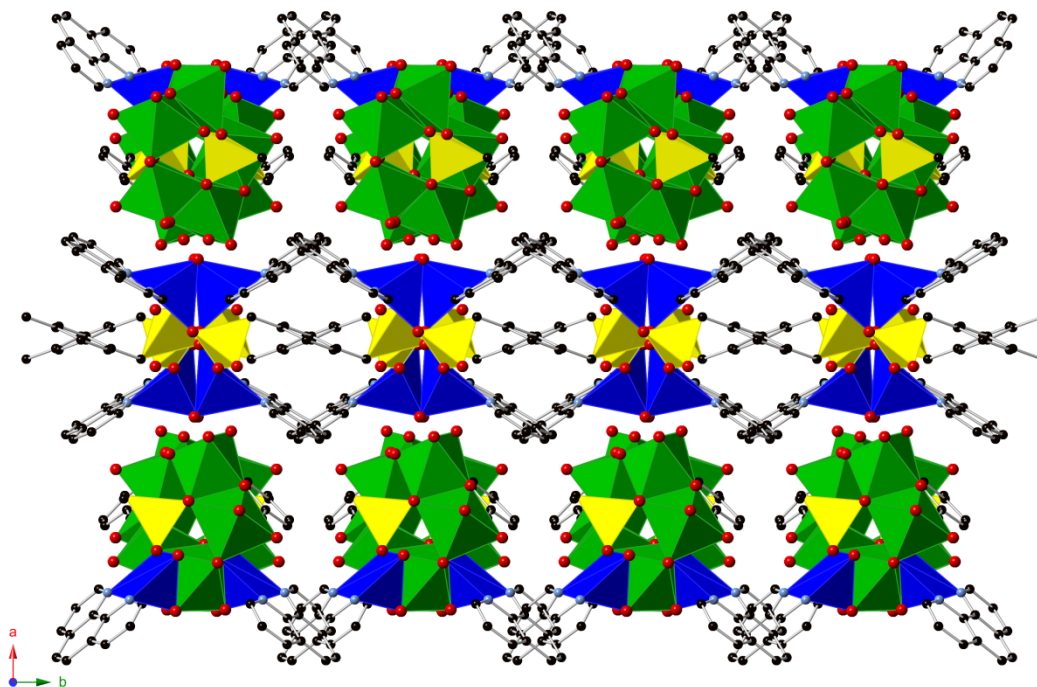

(a)

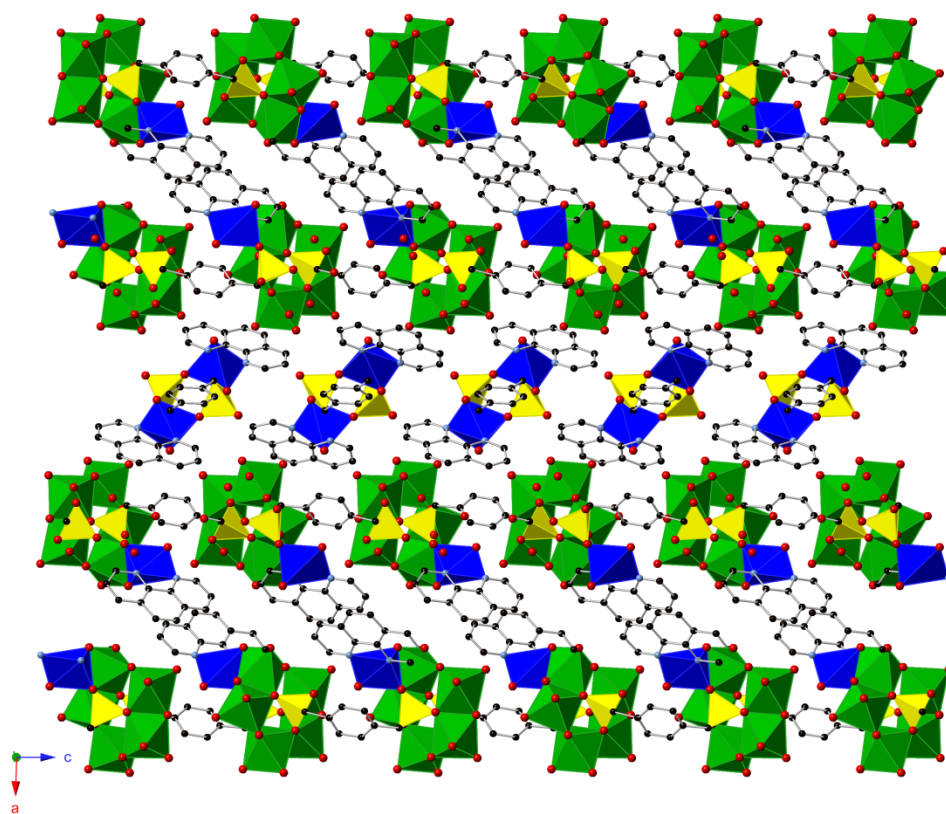

(b)



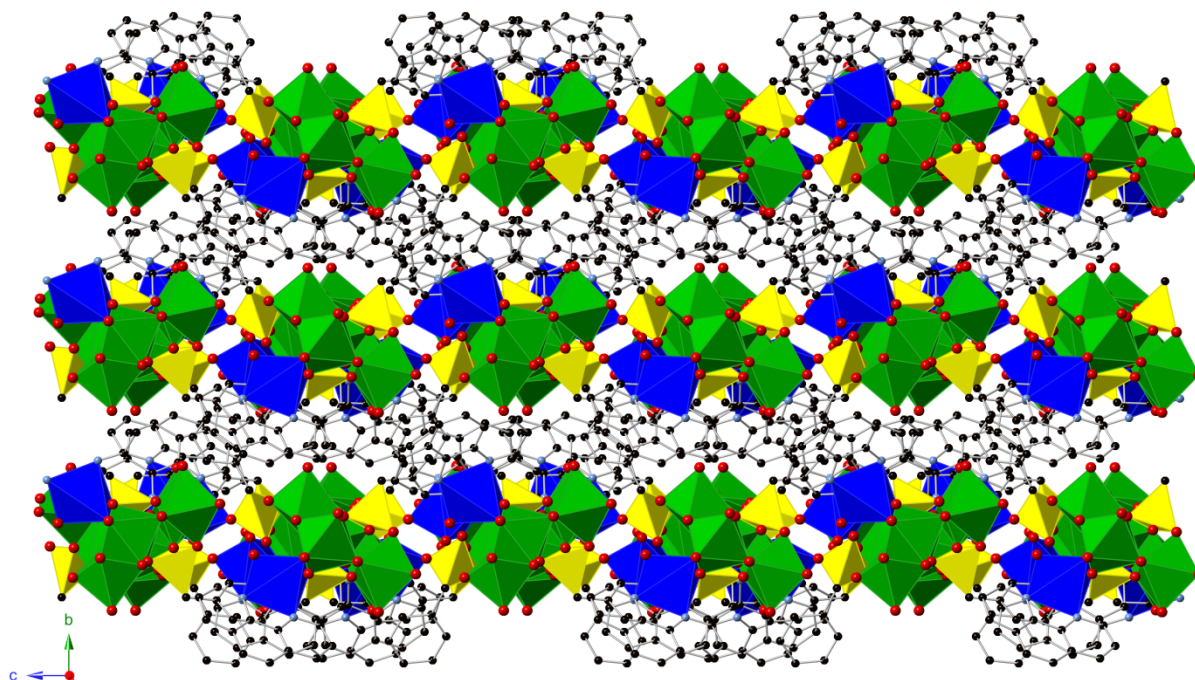

(c)

**Figure S21.** Packing view of **7** in the (a) *ab* plane (b) *ac* plane and (c) *bc* plane.

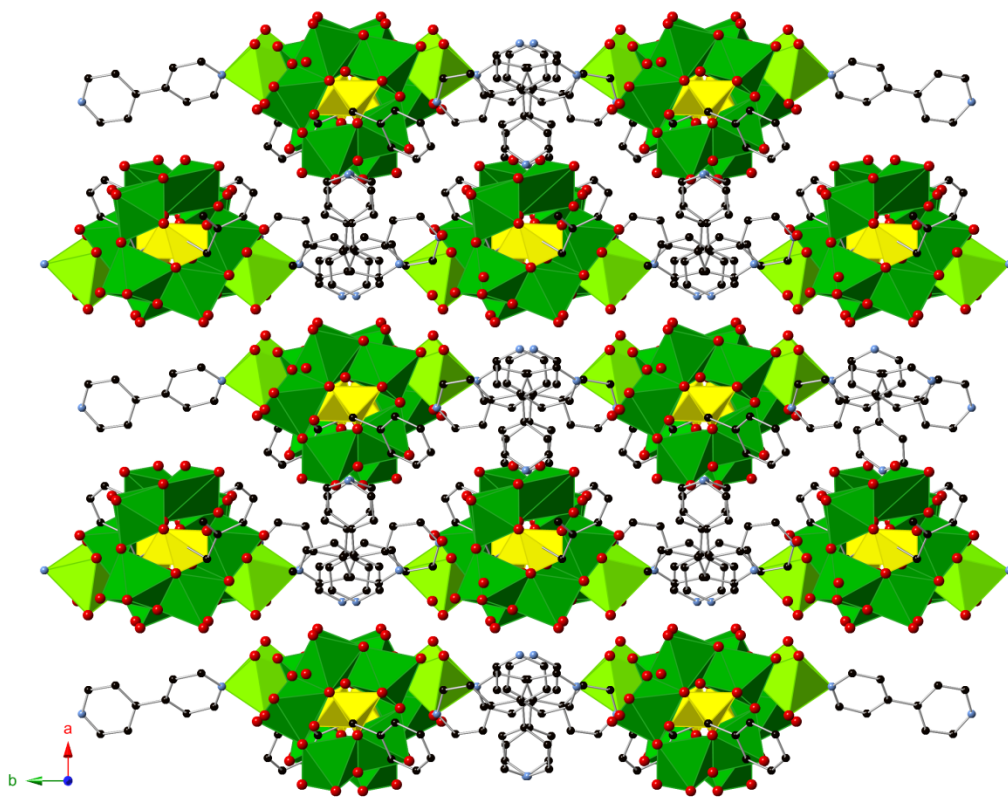

(a)

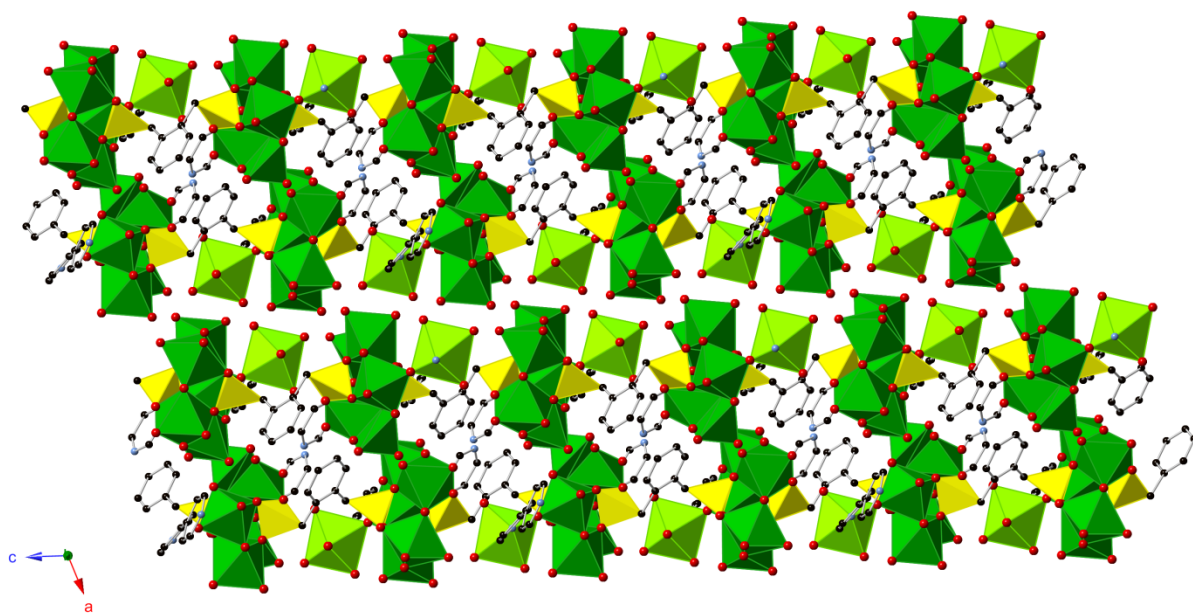

(b)

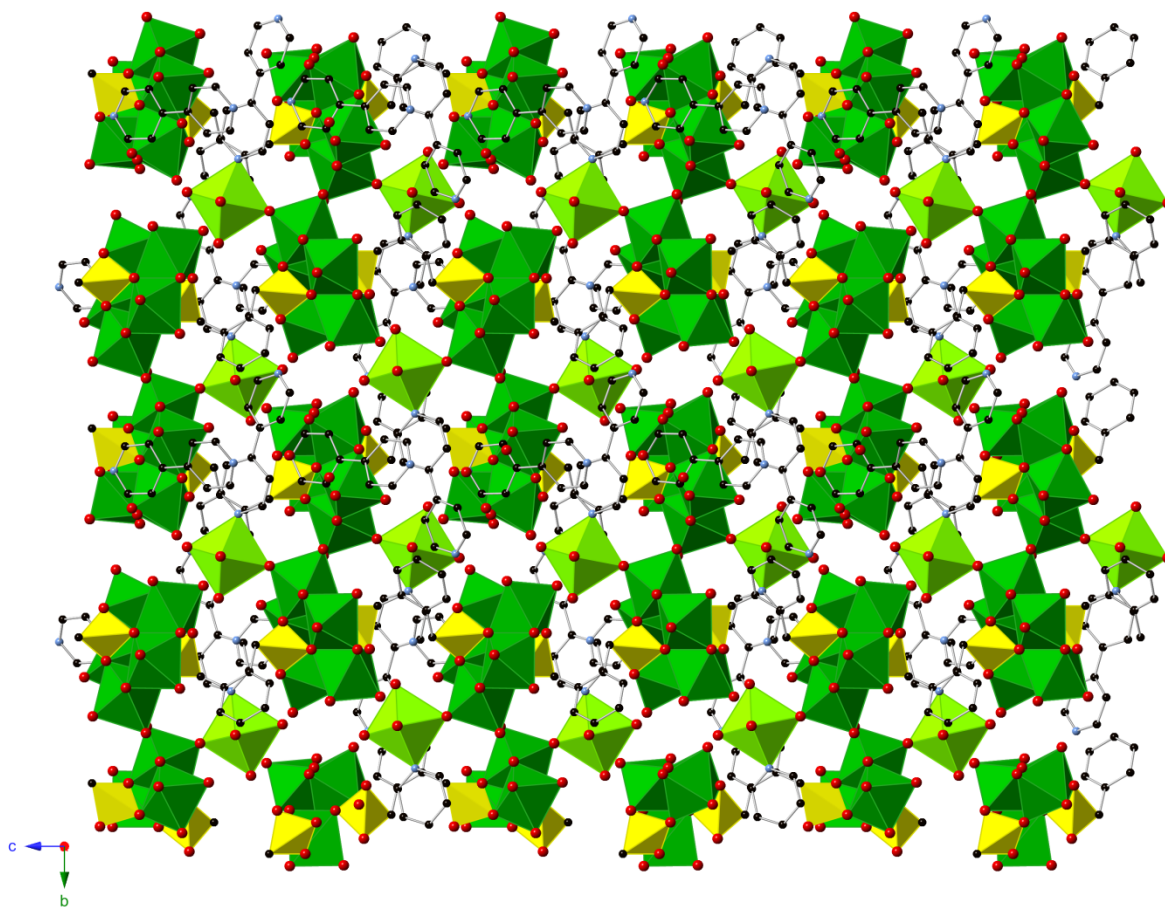

(c)

**Figure S22.** Packing view of  $8 \cdot 4\text{H}_2\text{O}$  in the (a) *ab* plane (b) *ac* plane and (c) *bc* plane. Water molecules of crystallization are removed for clarity.



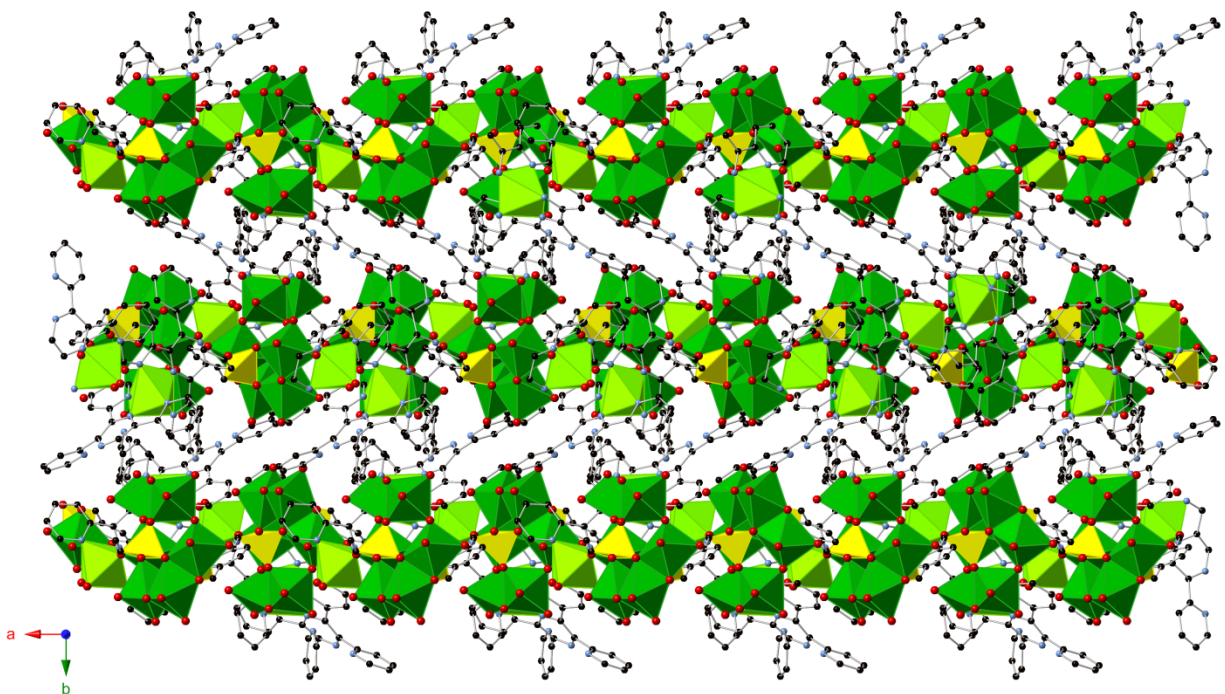

(a)

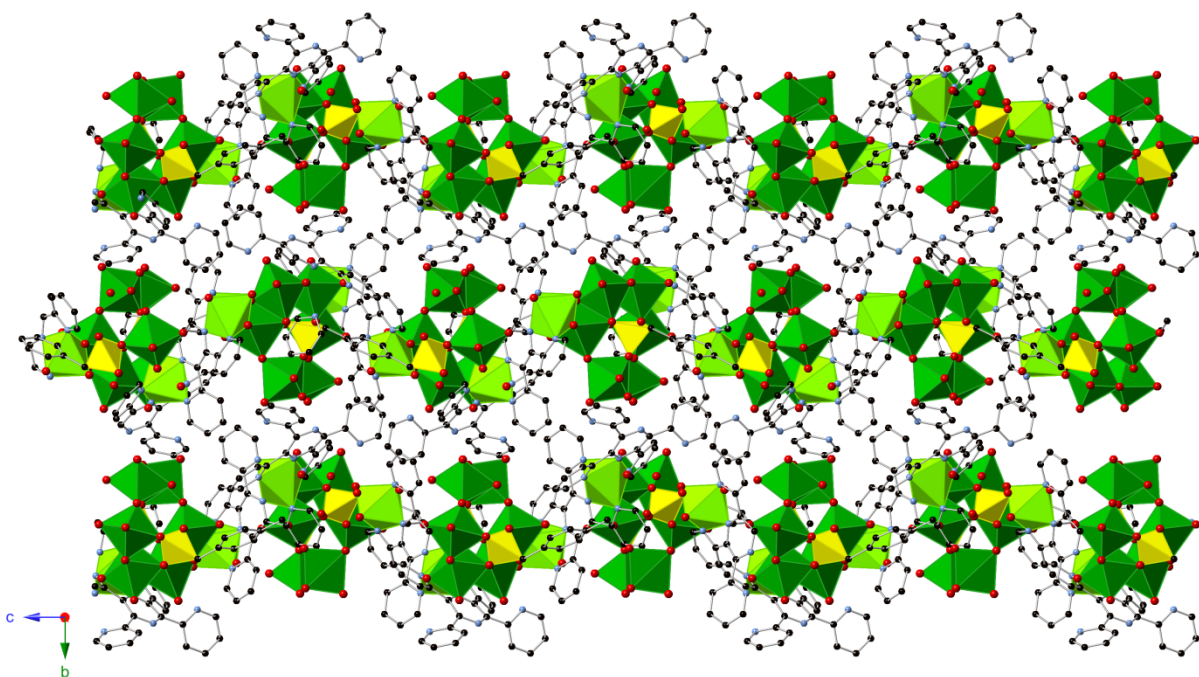

(b)

**Figure S23.** Packing view of  $9 \cdot 6\text{H}_2\text{O}$  in the (a)  $ab$  plane and (b)  $bc$  plane. Water molecules of crystallization are removed for clarity.

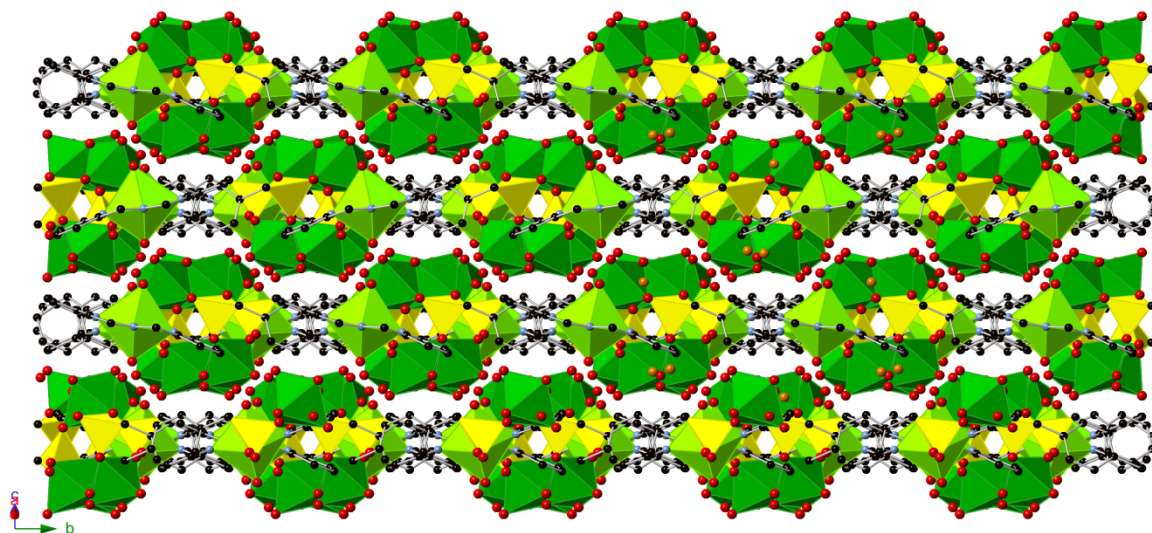

(a)

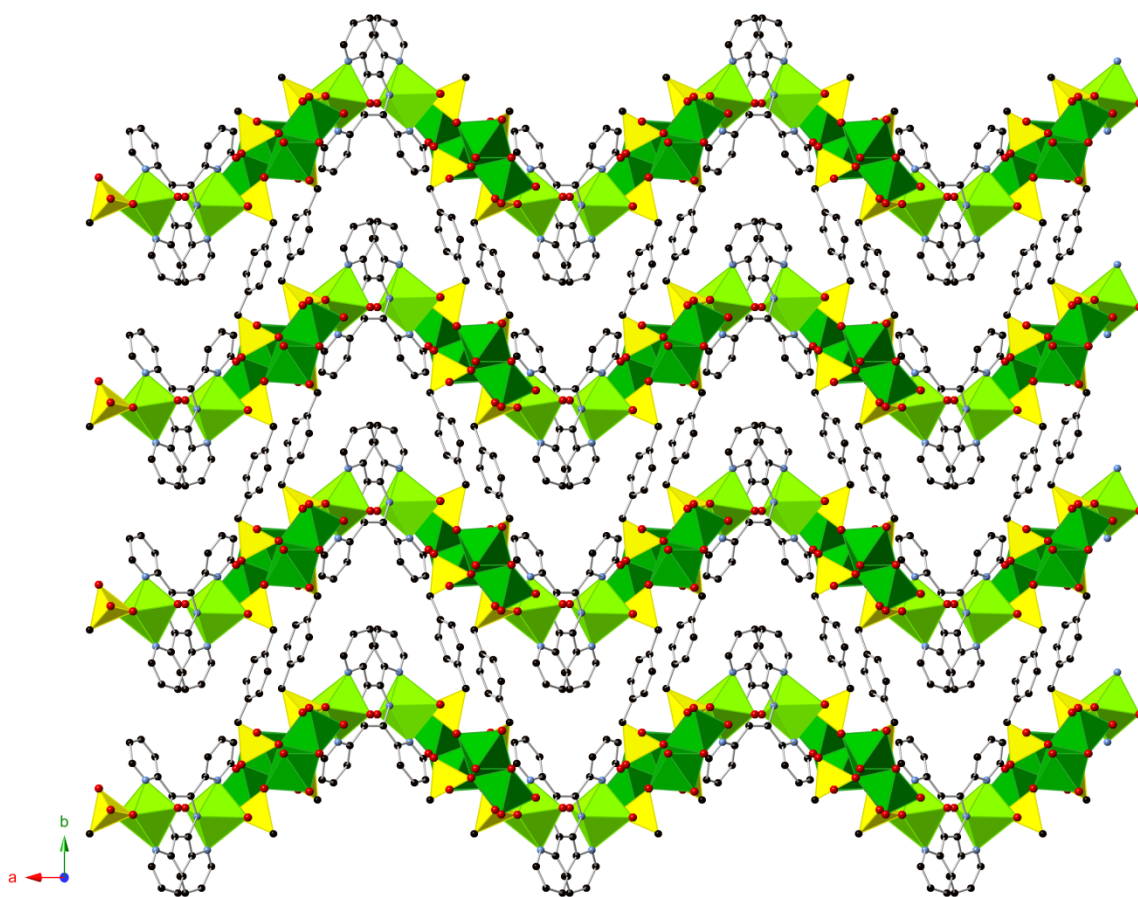

(b)

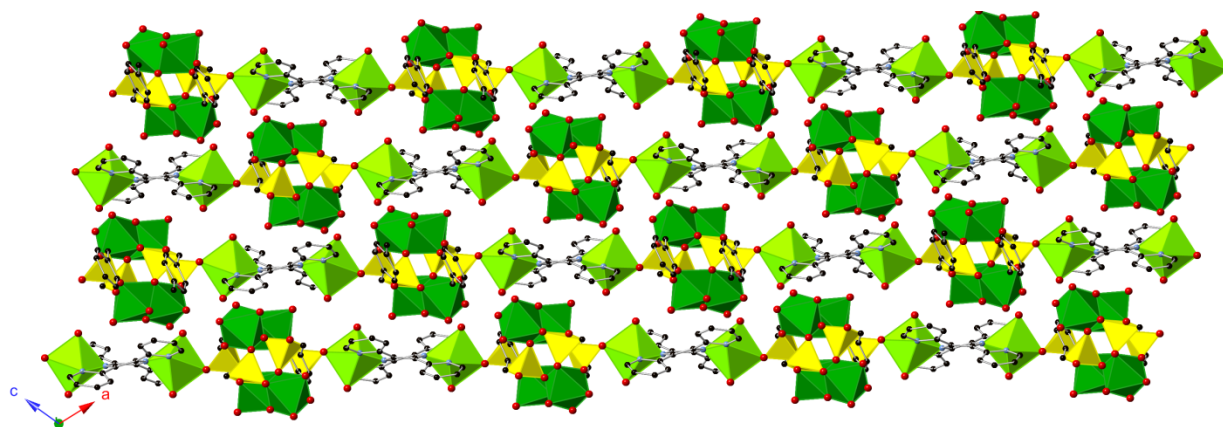

(c)

**Figure S24.** Packing view of  $10 \cdot 4\text{H}_2\text{O}$  in the (a) *101* plane (orange spheres: water molecules of crystallization) (b) *ab* plane and (c) *ac* plane. Water molecules of crystallization are removed for clarity unless otherwise noted.



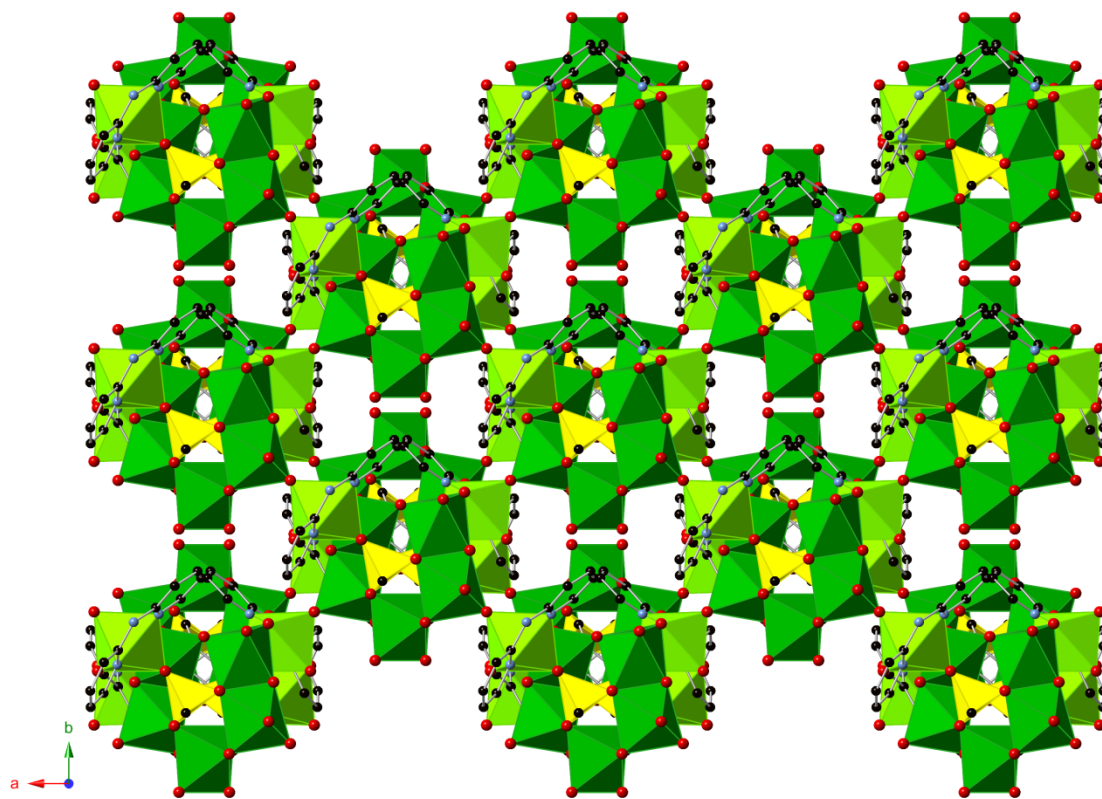

(a)

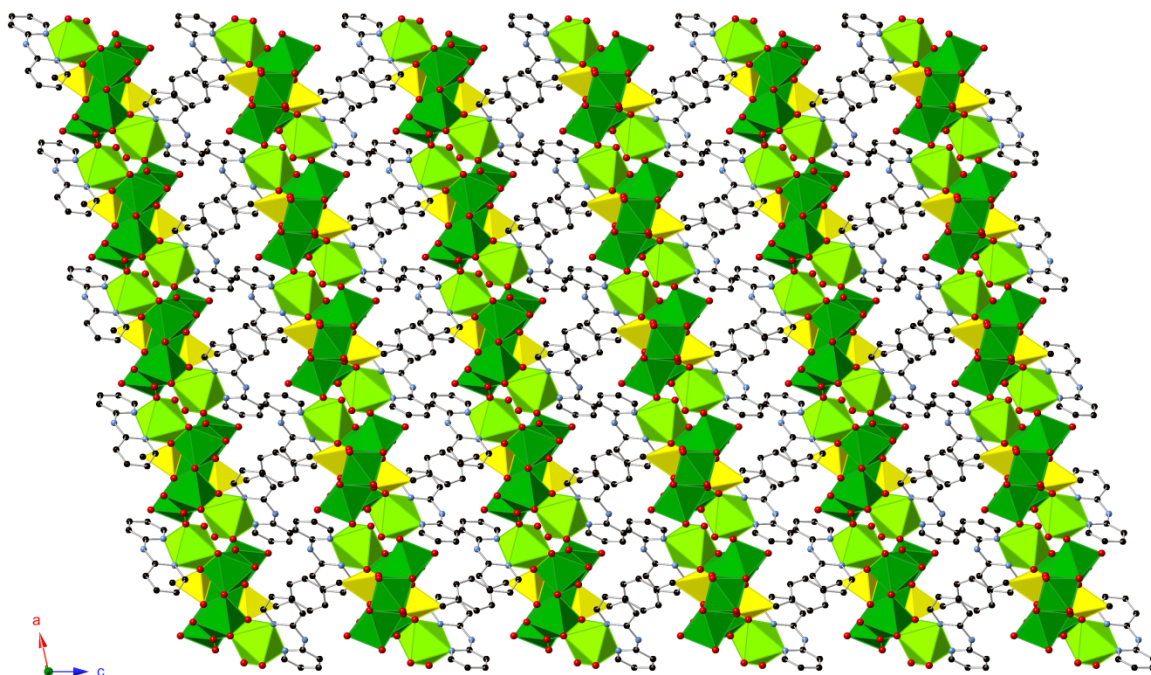

(b)

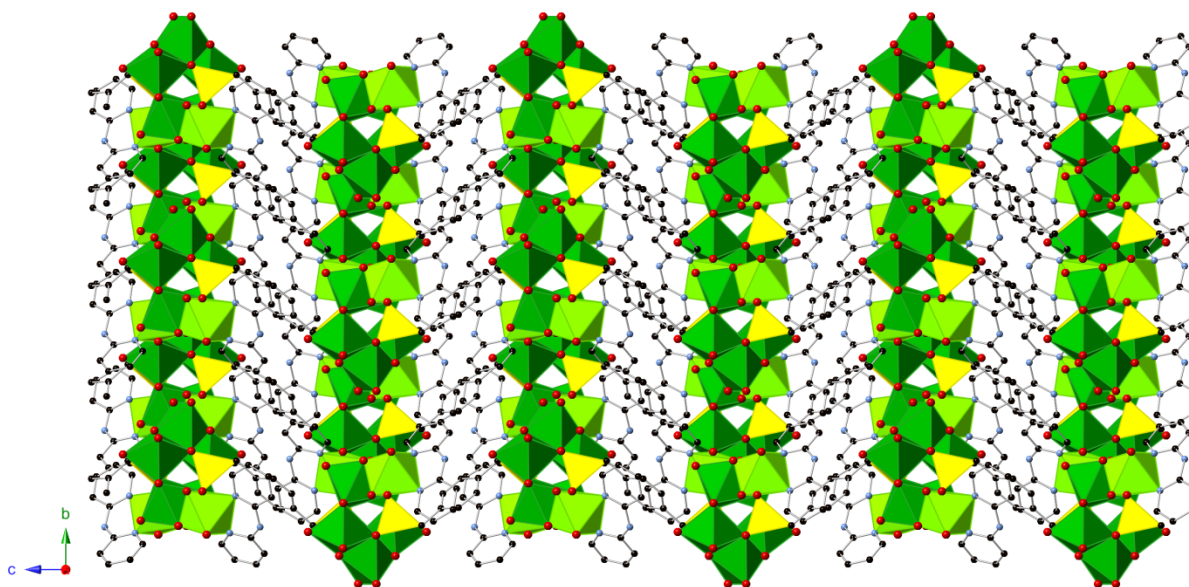

(c)

**Figure S25.** Packing view of  $11 \cdot 2\text{H}_2\text{O}$  in the (a) *ab* plane (b) *ac* plane and (c) *bc* plane. Water molecules of crystallization are removed for clarity.



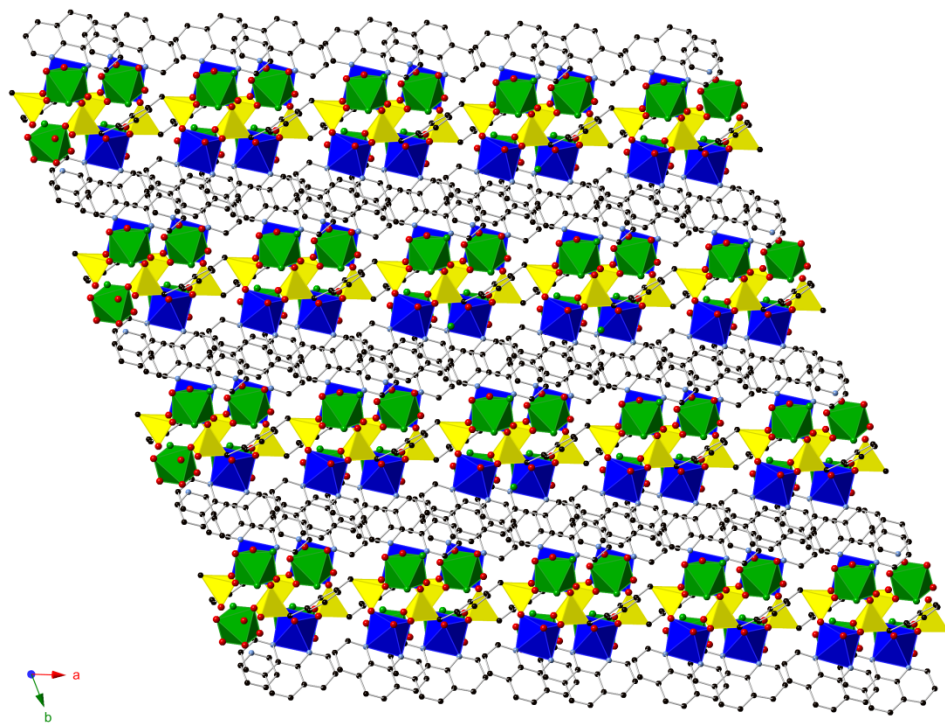

(a)

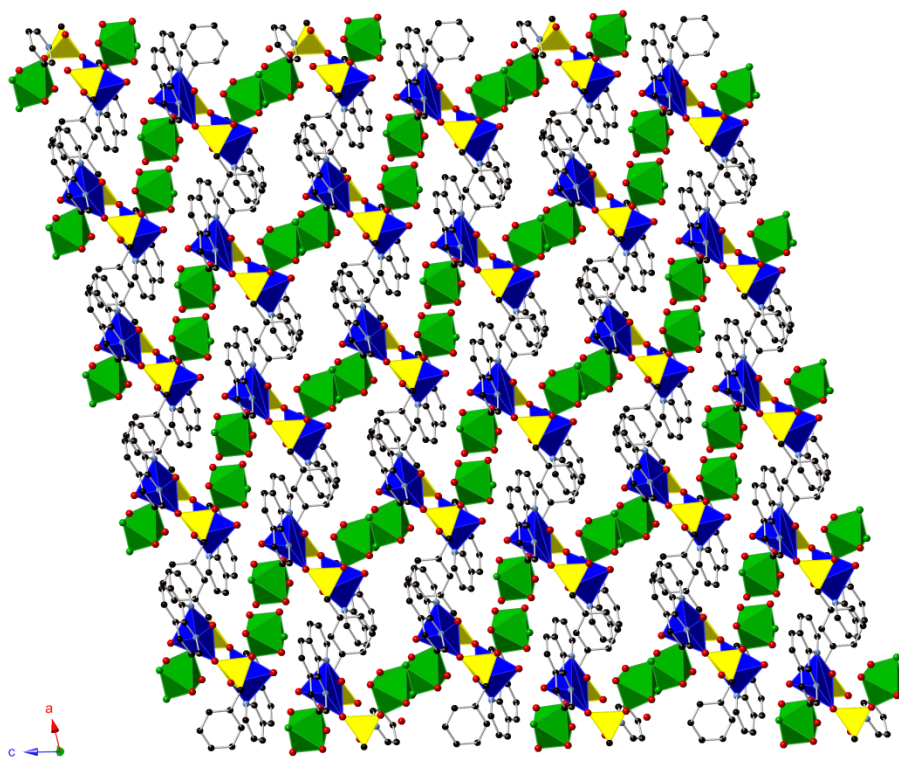

(b)

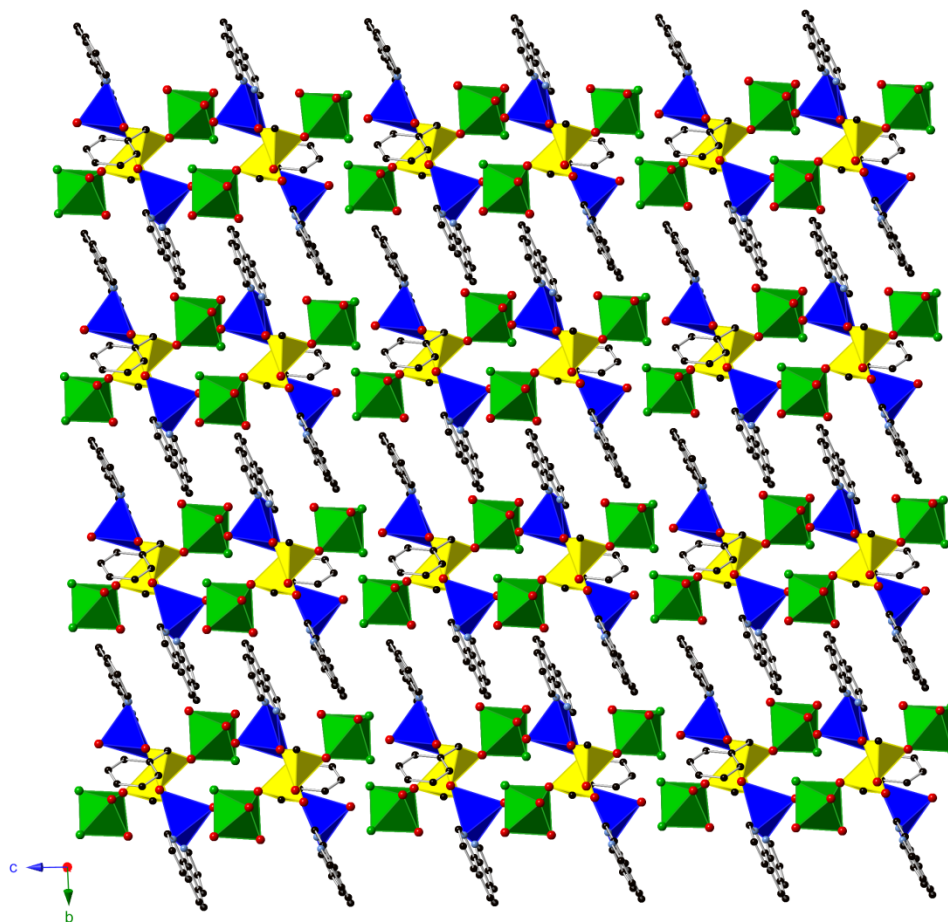

(c)

**Figure S26.** Packing view of  $12 \cdot \text{H}_2\text{O}$  in the (a) *ab* plane (b) *ac* plane and (c) *bc* plane. Water molecules of crystallization are removed for clarity.

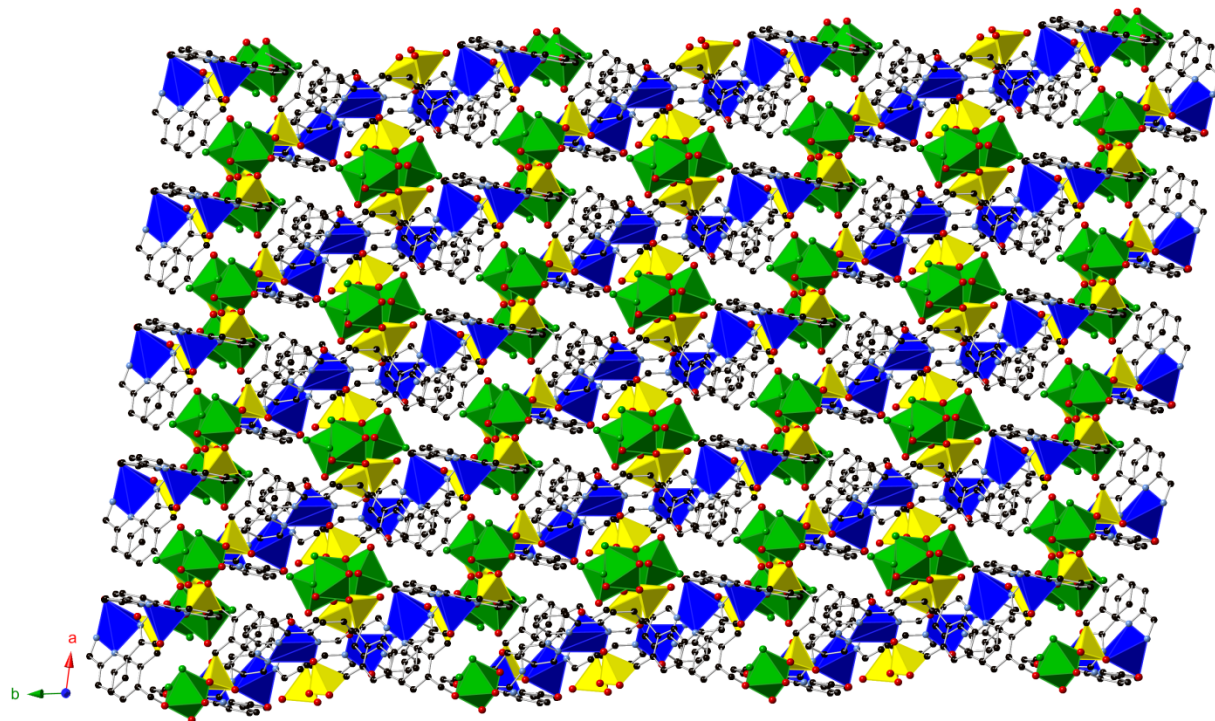

(a)

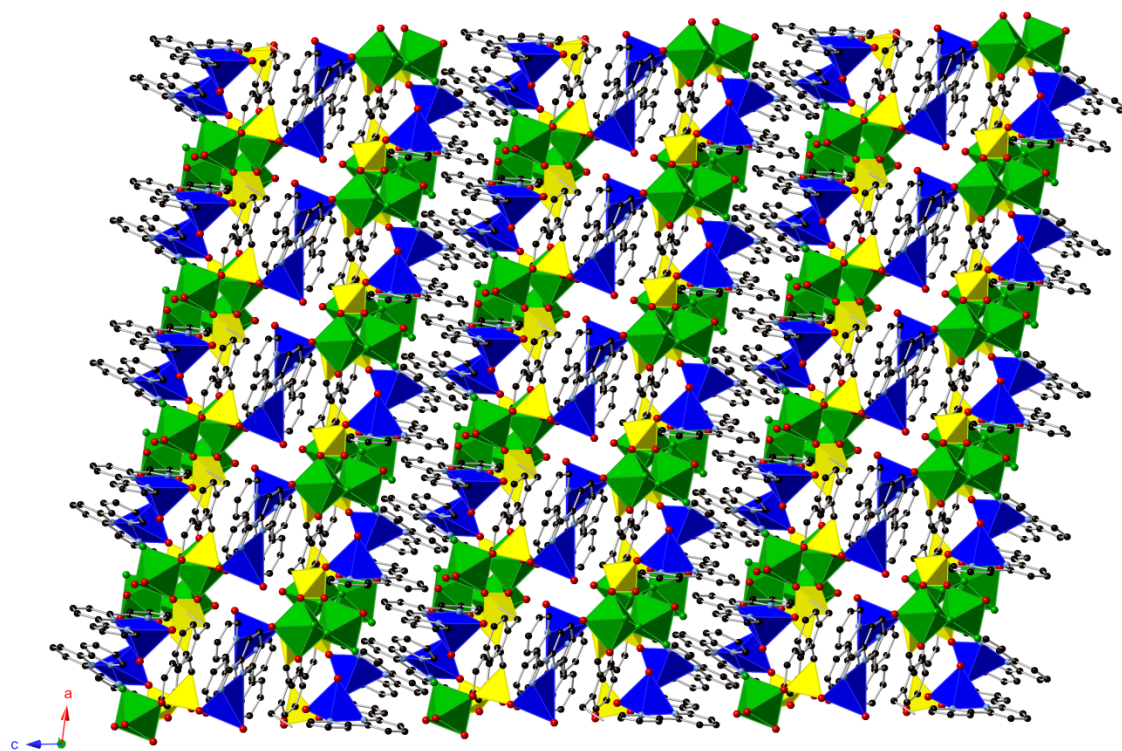

(b)



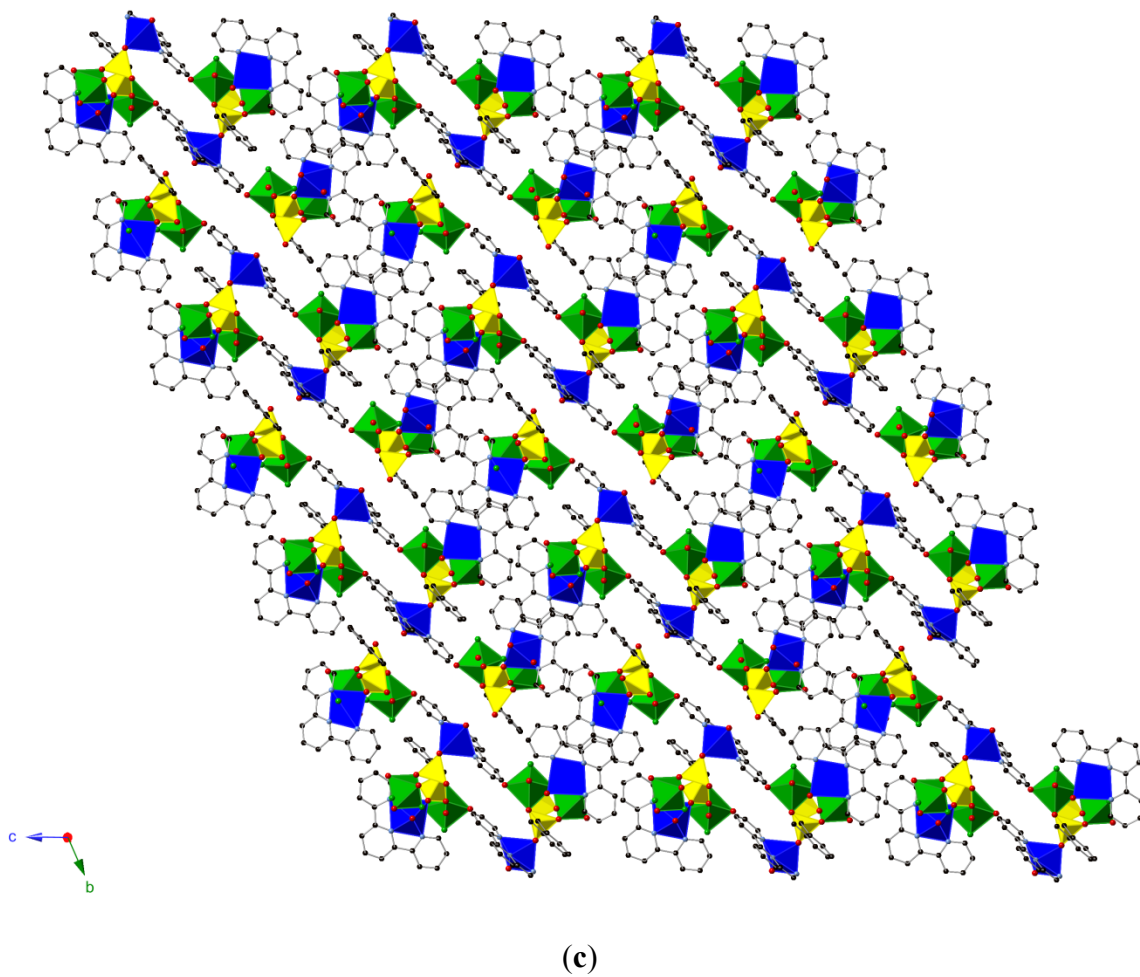

**Figure S27.** Packing view of  $13 \cdot \text{H}_2\text{O}$  in the (a) *ab* plane (b) *ac* plane and (c) *bc* plane. Water molecules of crystallization are removed for clarity.

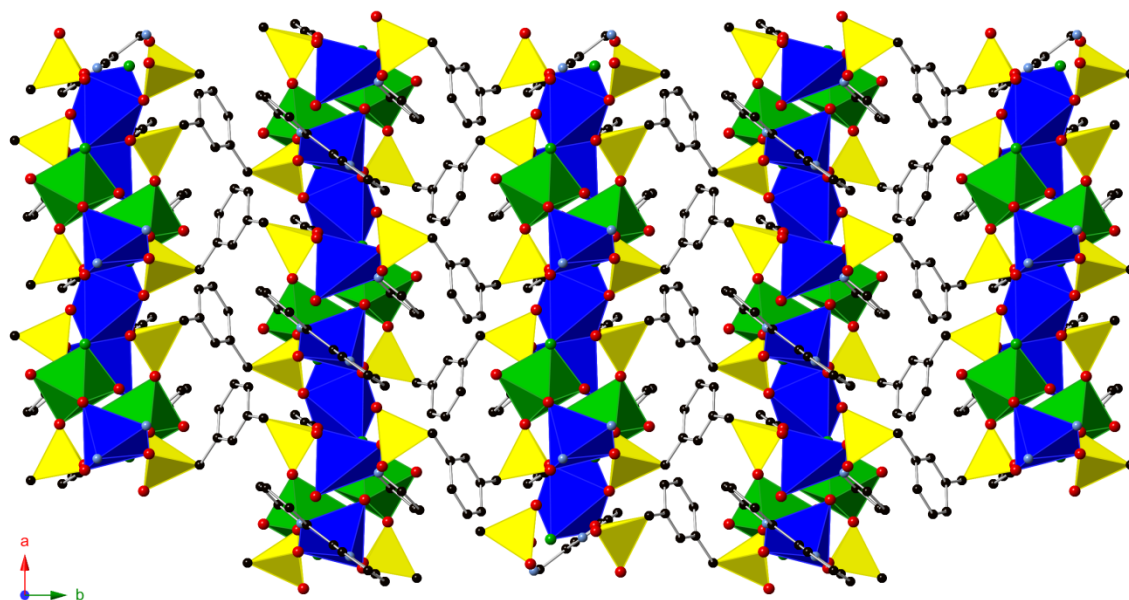

(a)

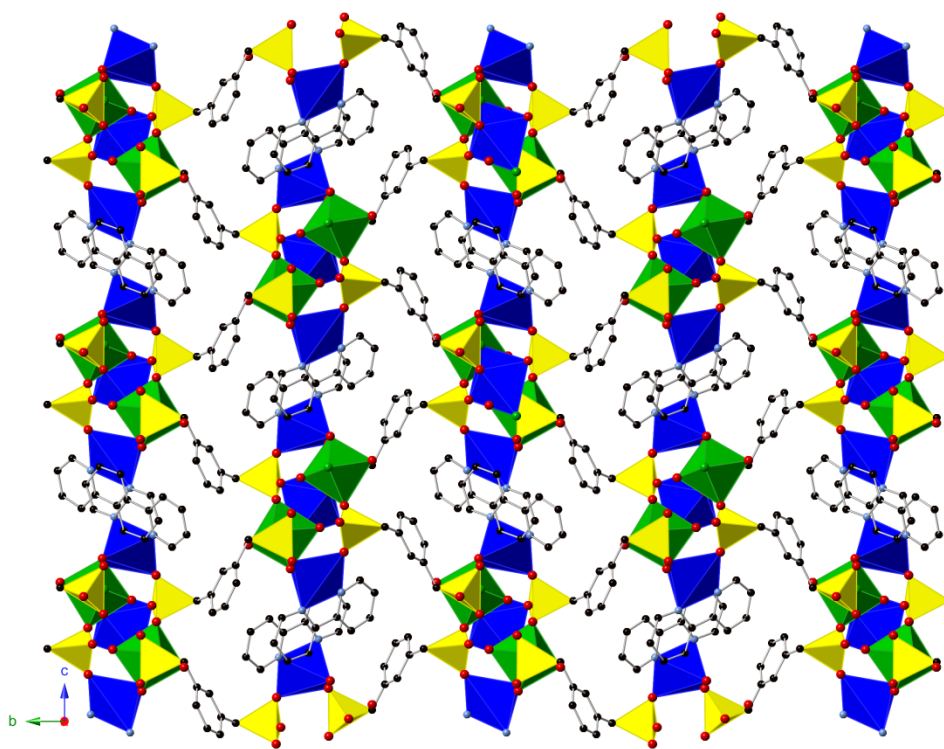

(b)

**Figure S28.** Packing view of 14 in the (a) *ab* plane and (b) *bc* plane.

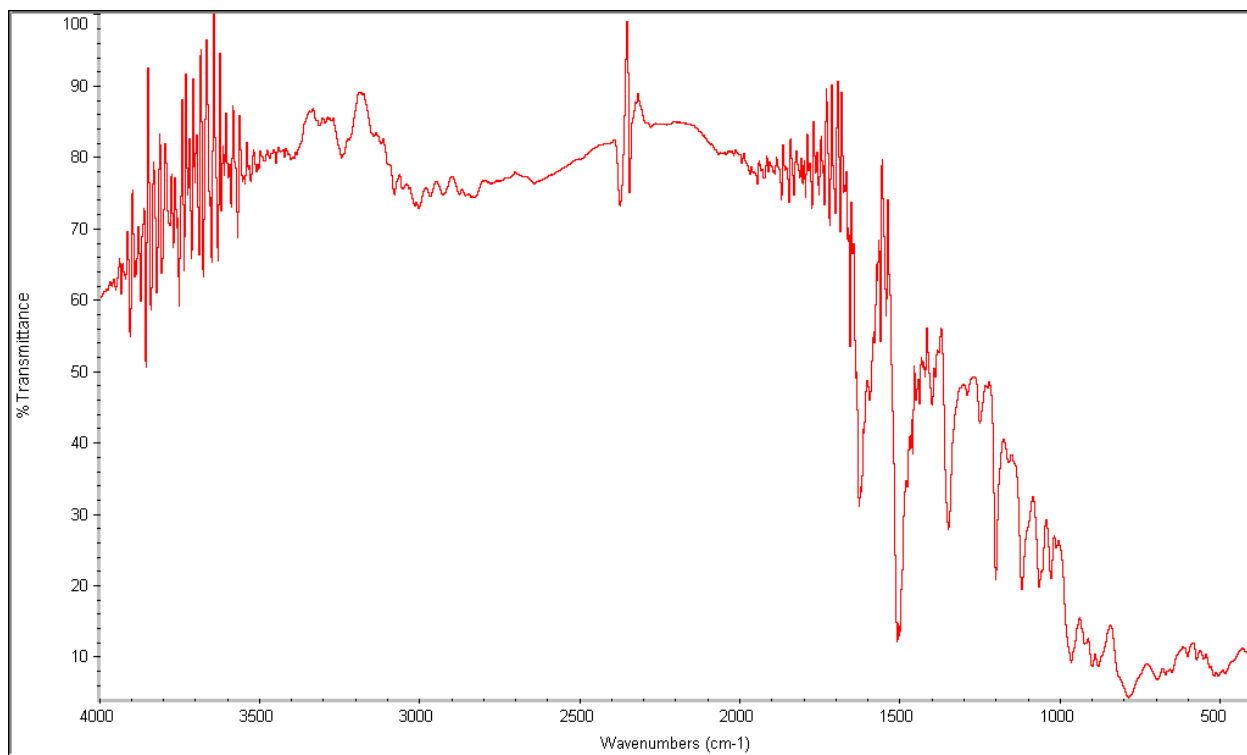

**Figure S29.** Infrared spectra for 1·H<sub>2</sub>O.

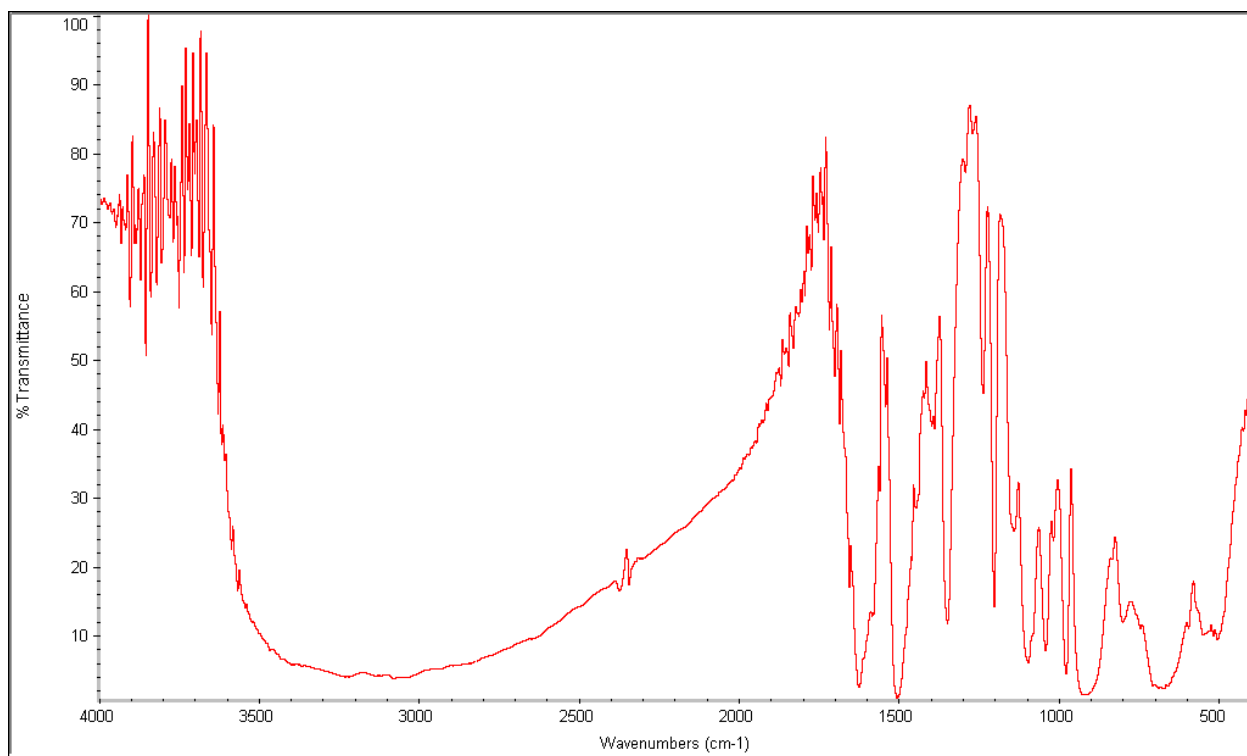

**Figure S30.** Infrared spectra for 2.

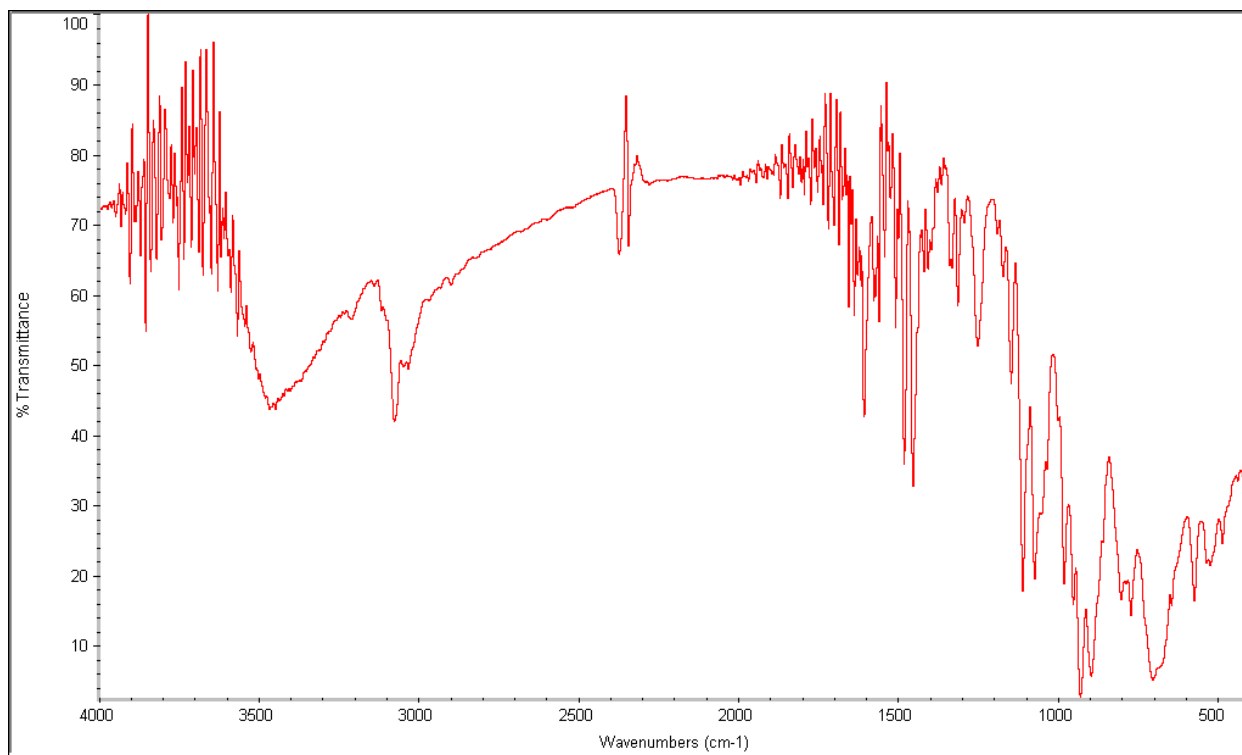

**Figure S31.** Infrared spectra for 3·H<sub>2</sub>O.

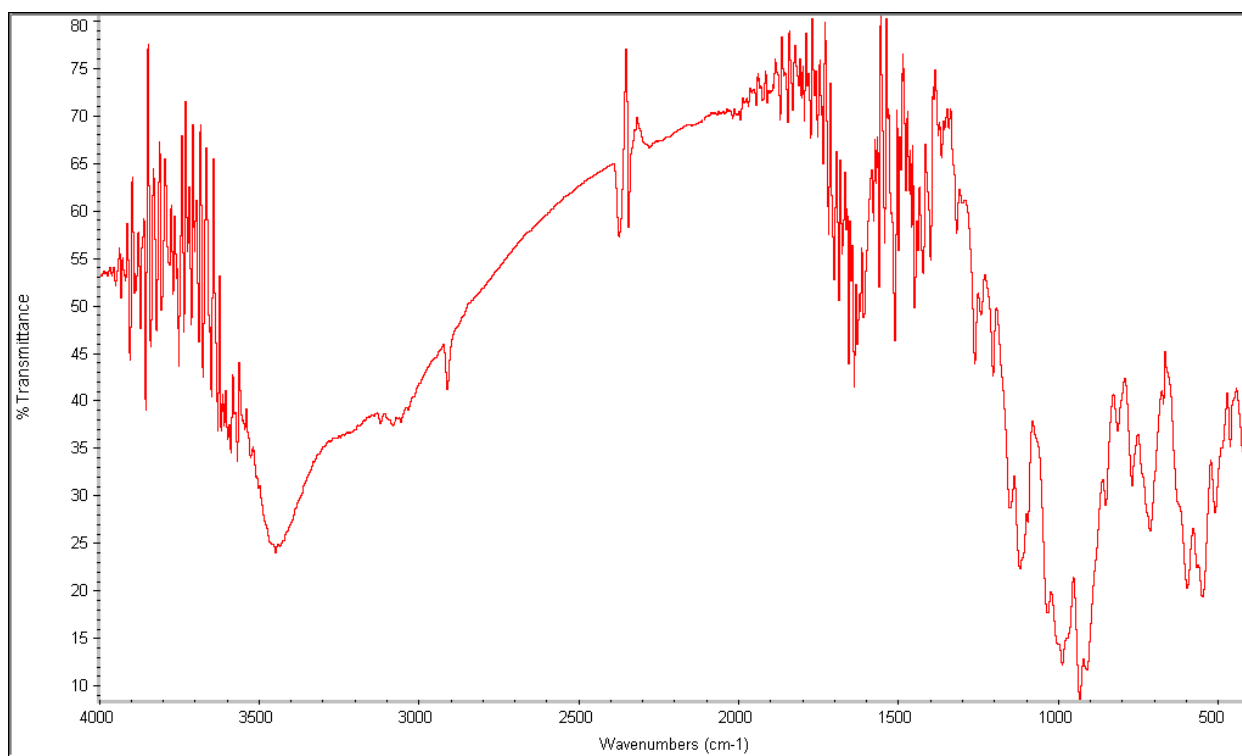

**Figure S32.** Infrared spectra for 4·6H<sub>2</sub>O.

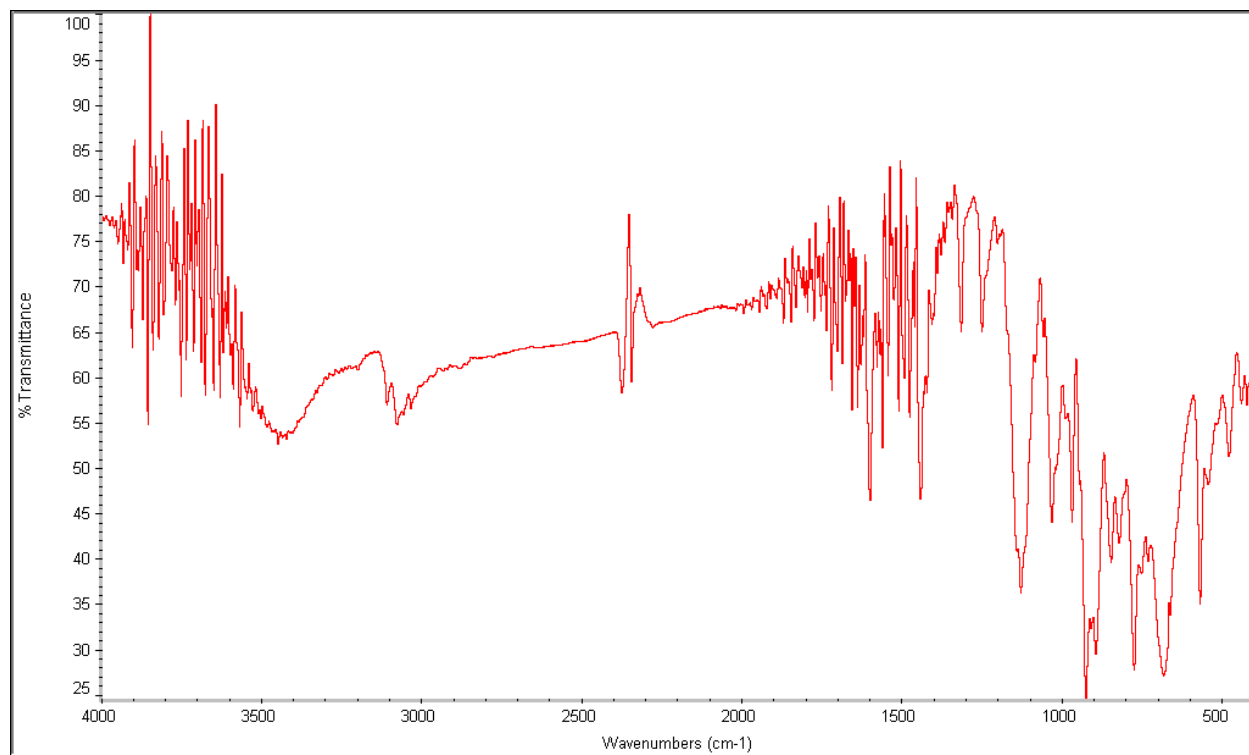

**Figure S33.** Infrared spectra for 5·6H<sub>2</sub>O.

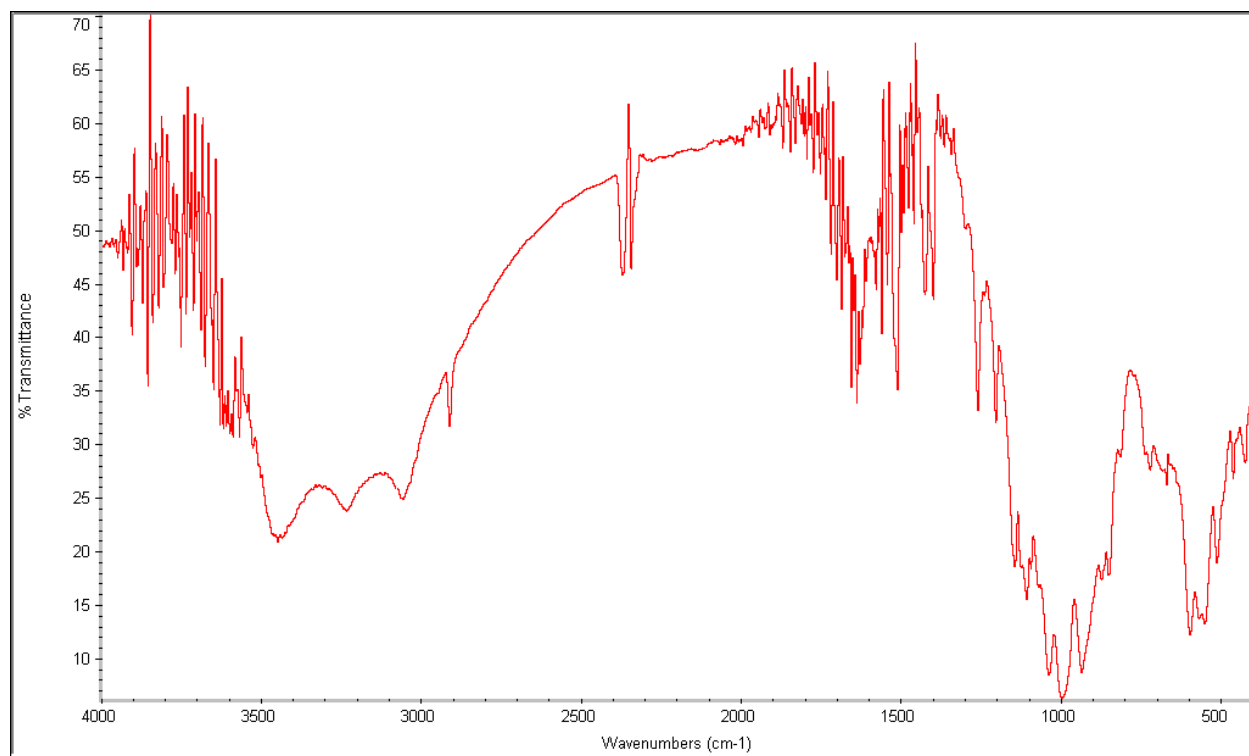

**Figure S34.** Infrared spectra for 6·4H<sub>2</sub>O.



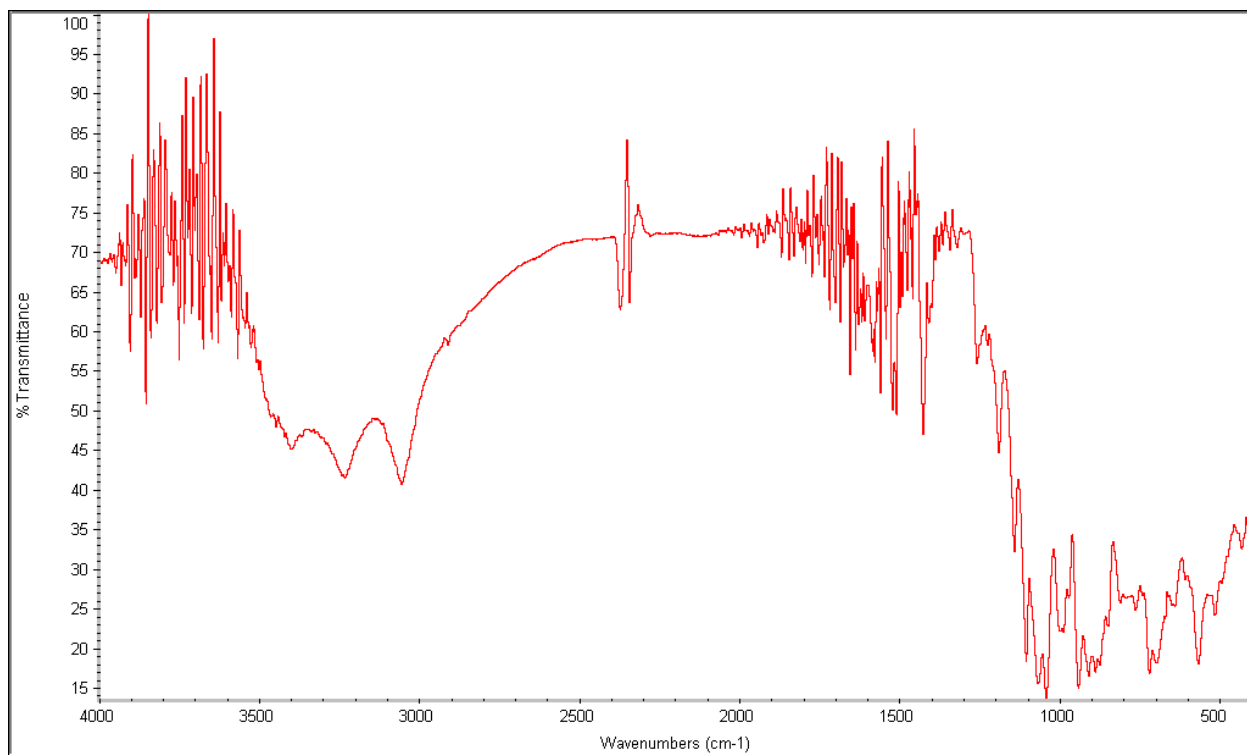

**Figure S35.** Infrared spectra for **7**.

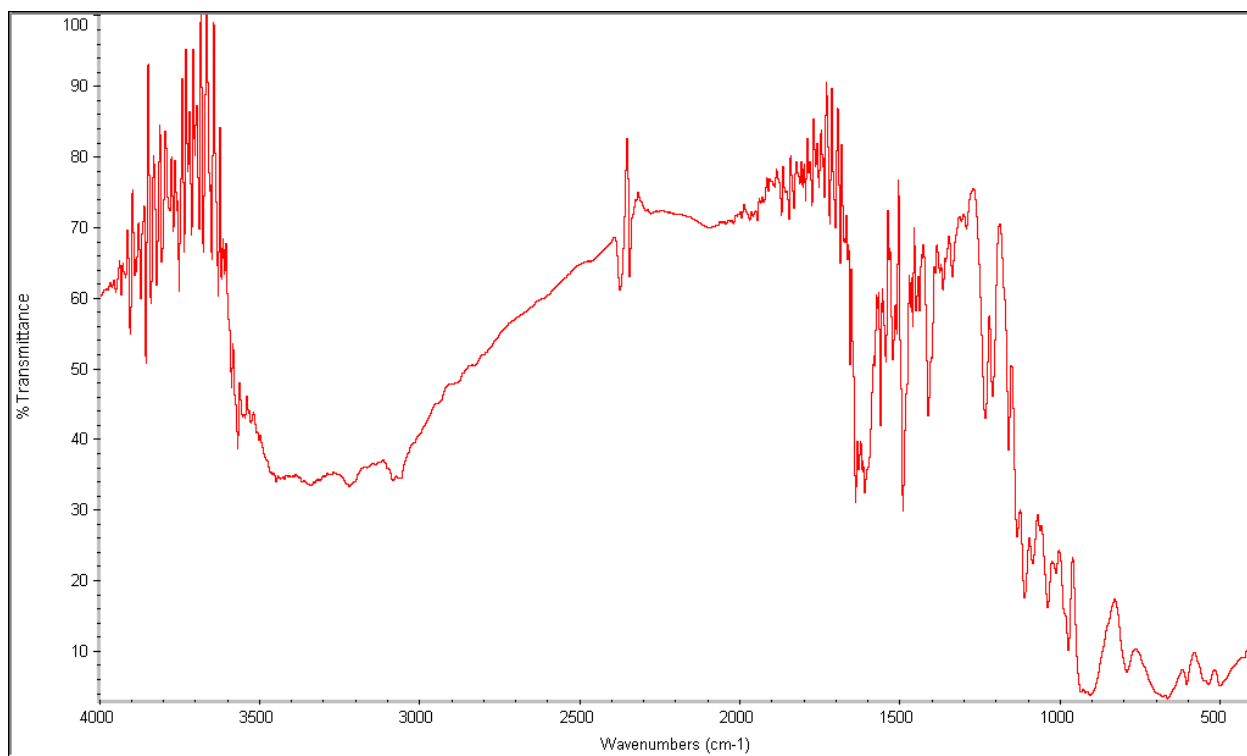

**Figure S36.** Infrared spectra for **8·4H<sub>2</sub>O**.

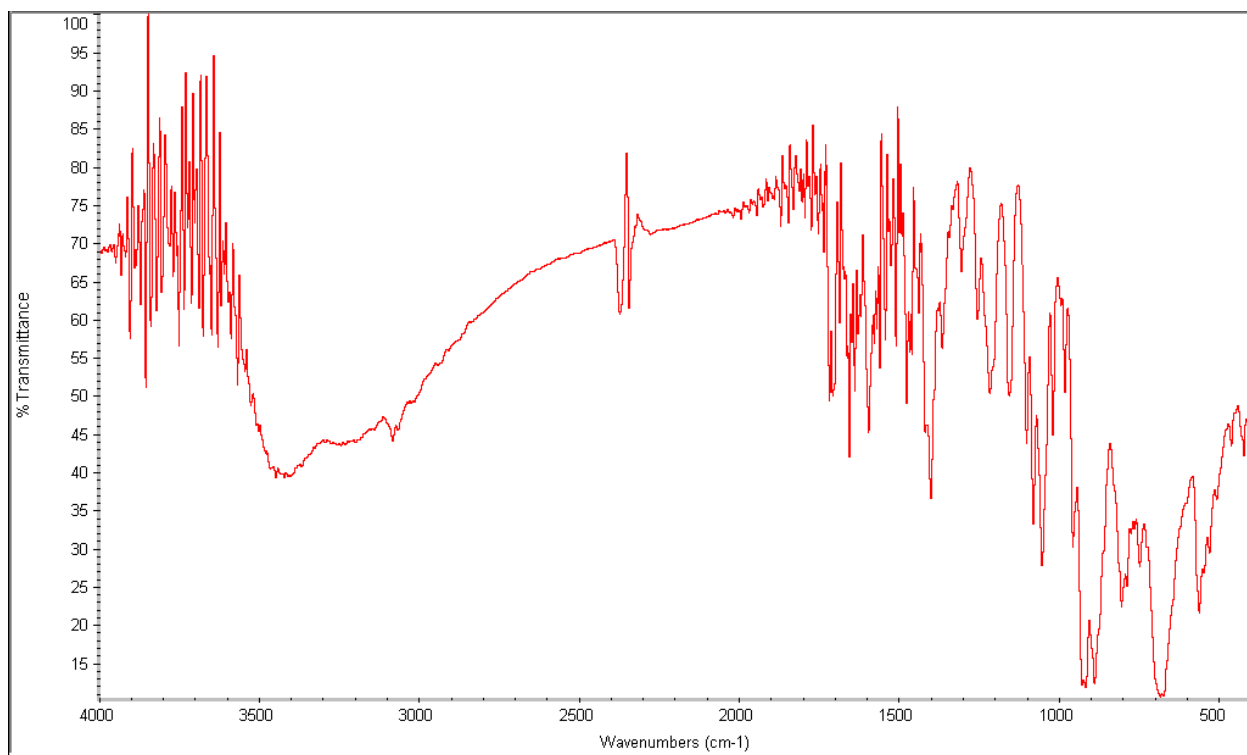

**Figure S37.** Infrared spectra for 9·6H<sub>2</sub>O.

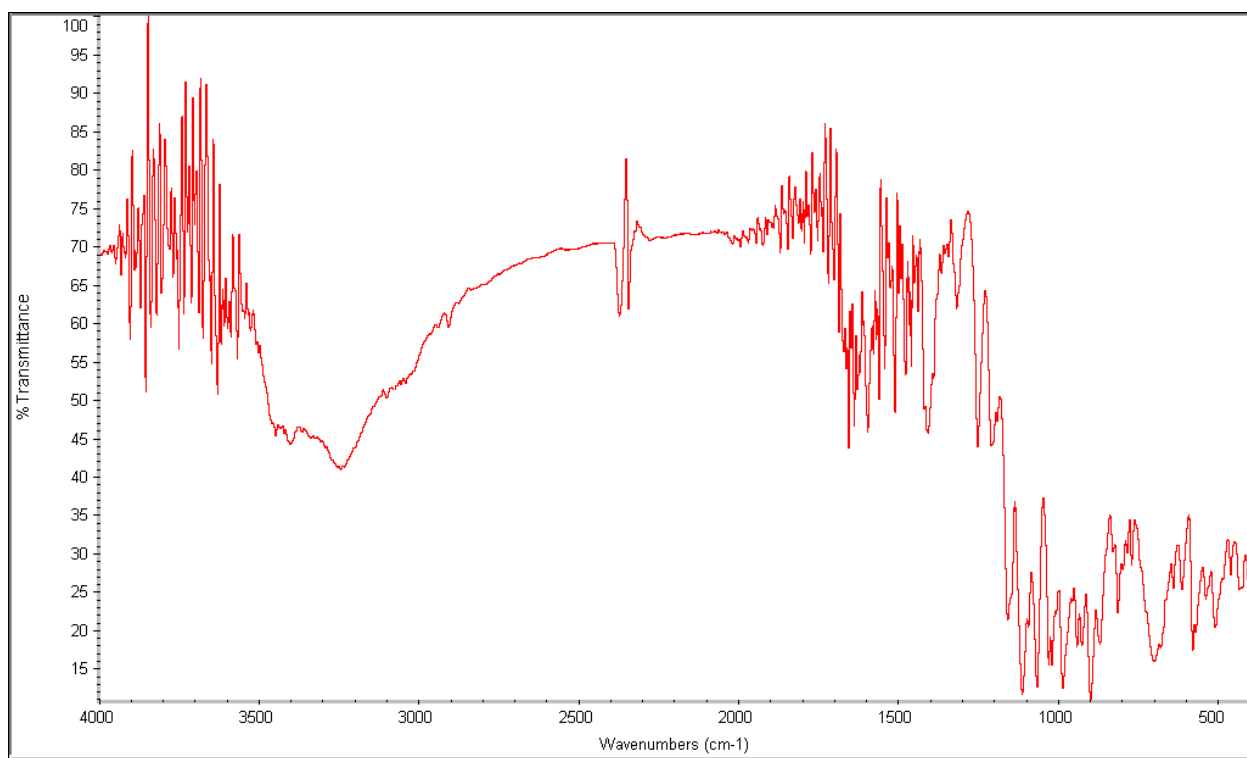

**Figure S38.** Infrared spectra for 10·4H<sub>2</sub>O.

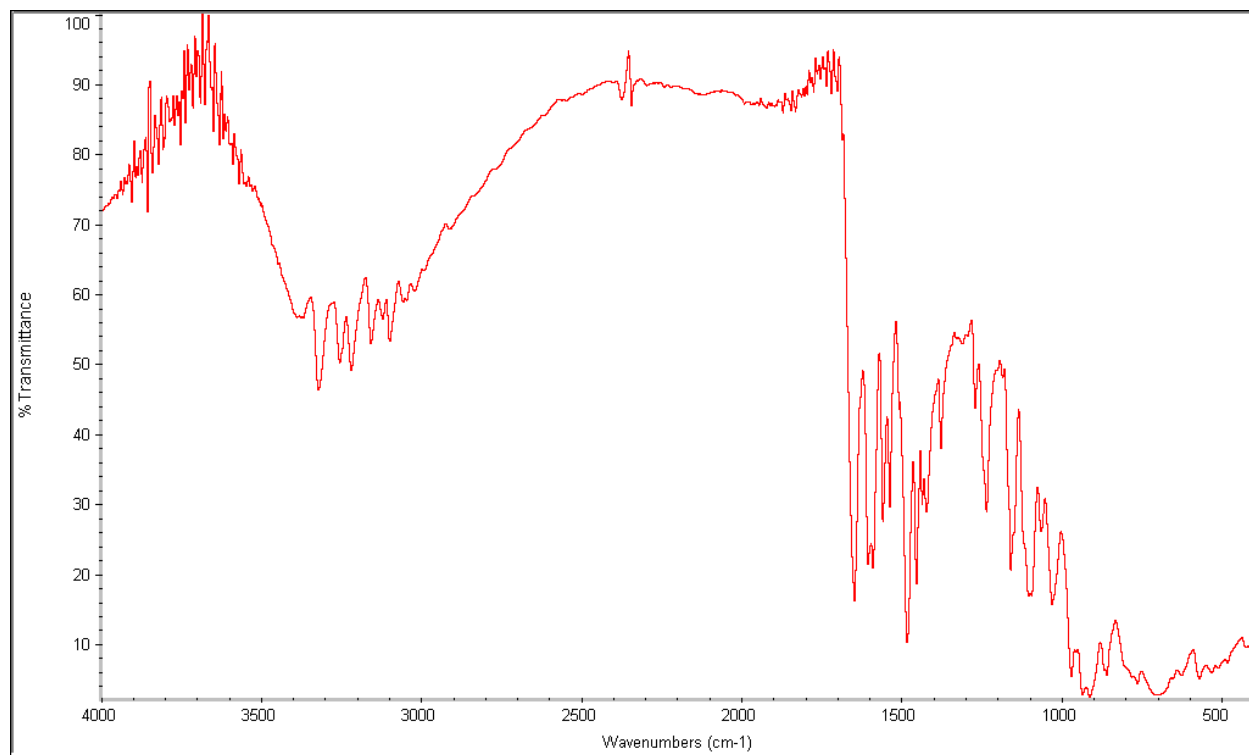

**Figure S39.** Infrared spectra for 11·2H<sub>2</sub>O.

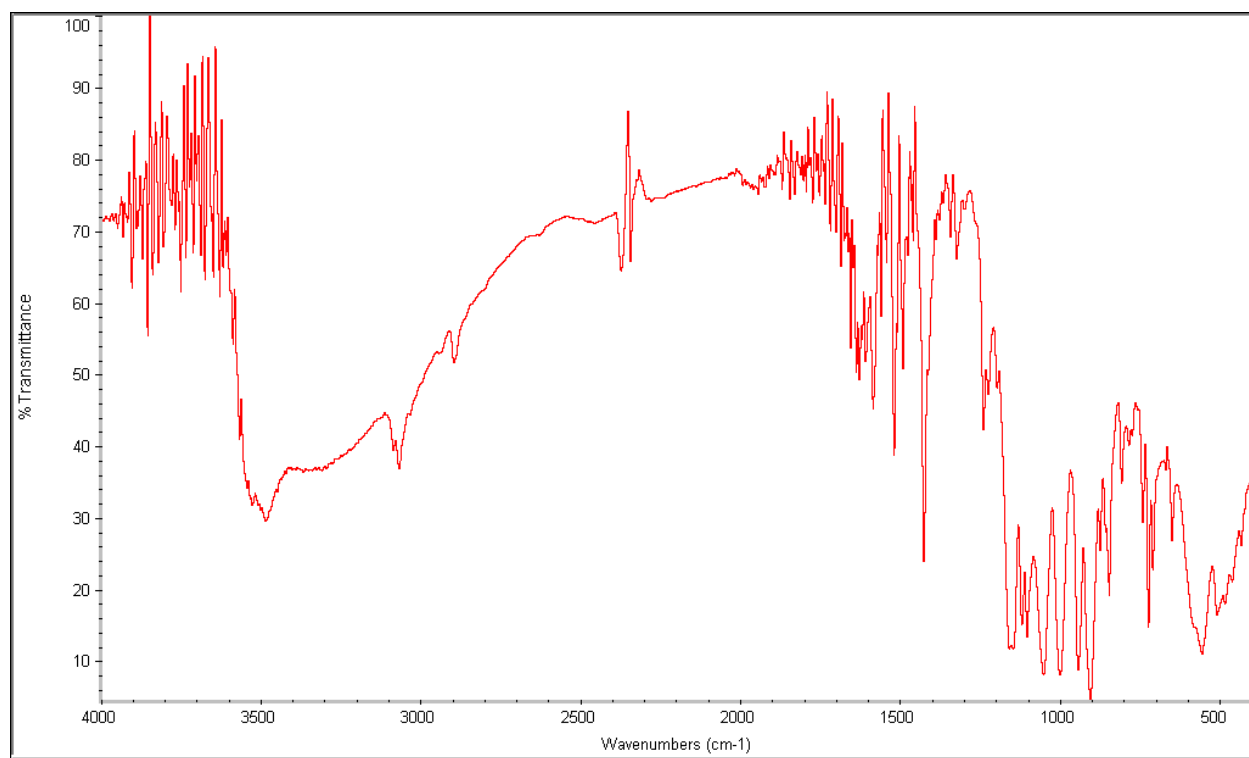

**Figure S40.** Infrared spectra for 12·H<sub>2</sub>O.

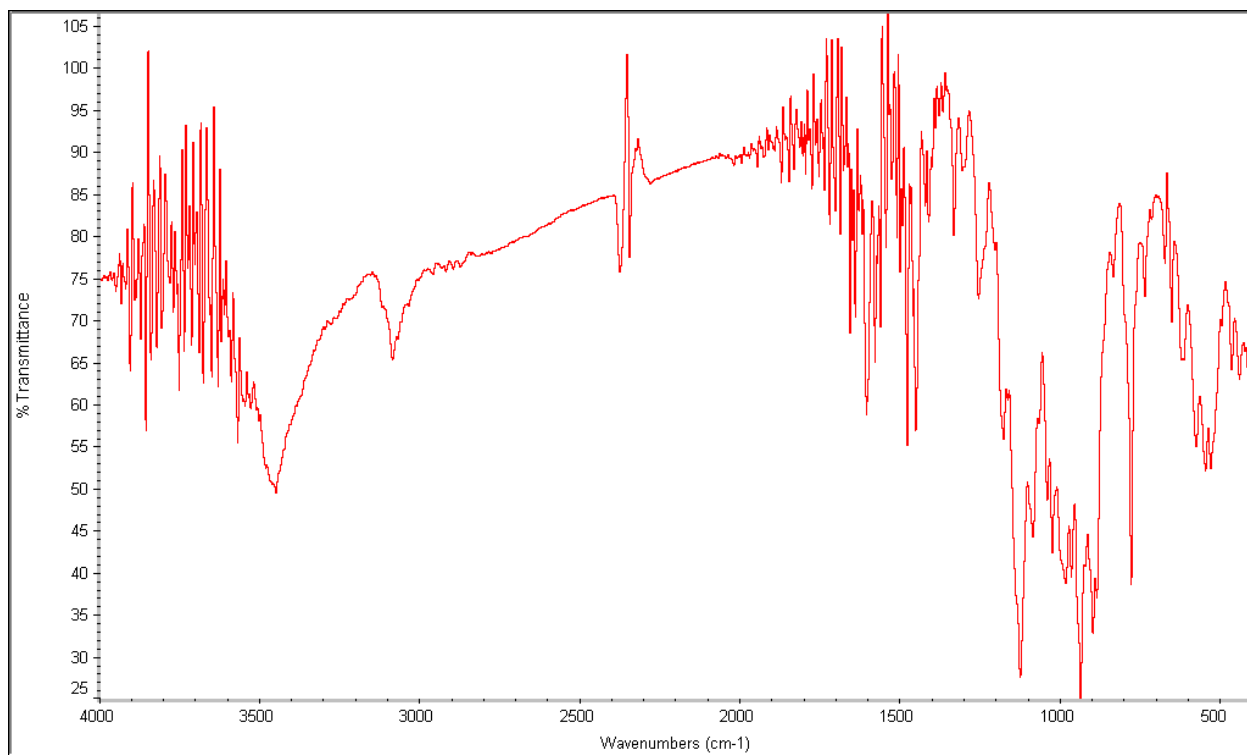

**Figure S41.** Infrared spectra for 13·H<sub>2</sub>O.

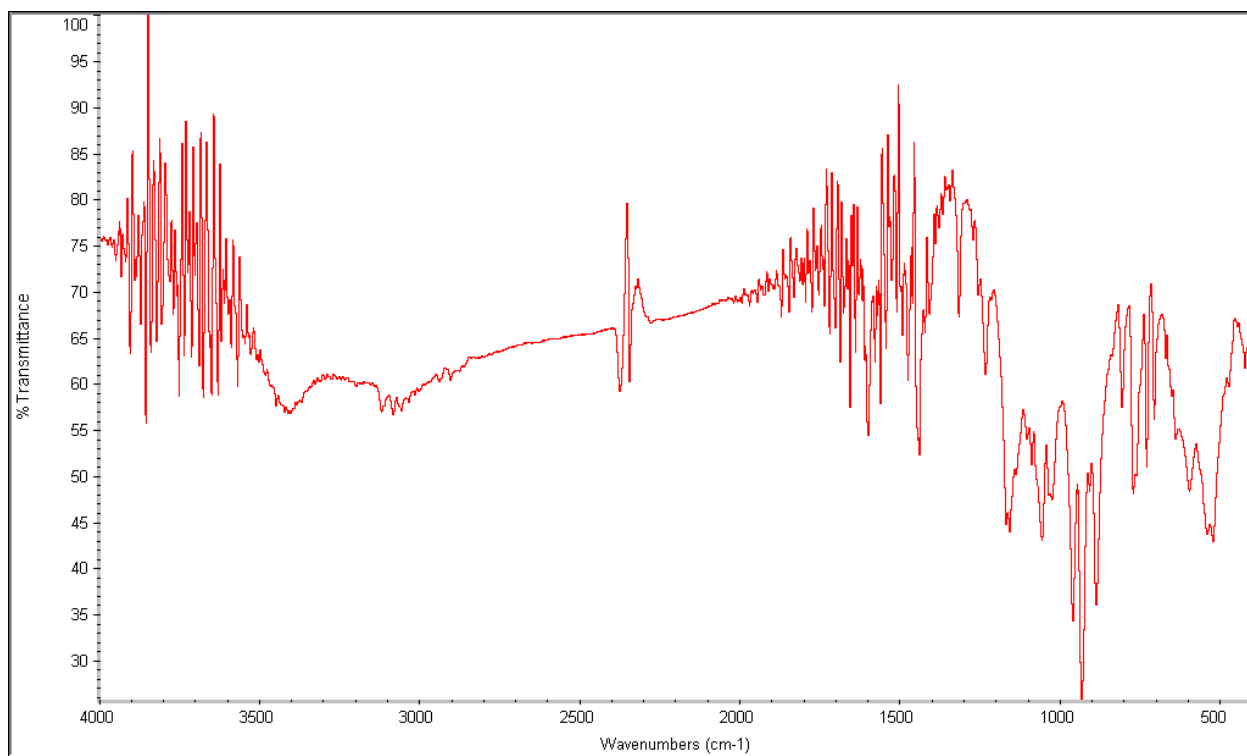

**Figure S42.** Infrared spectra for 14.

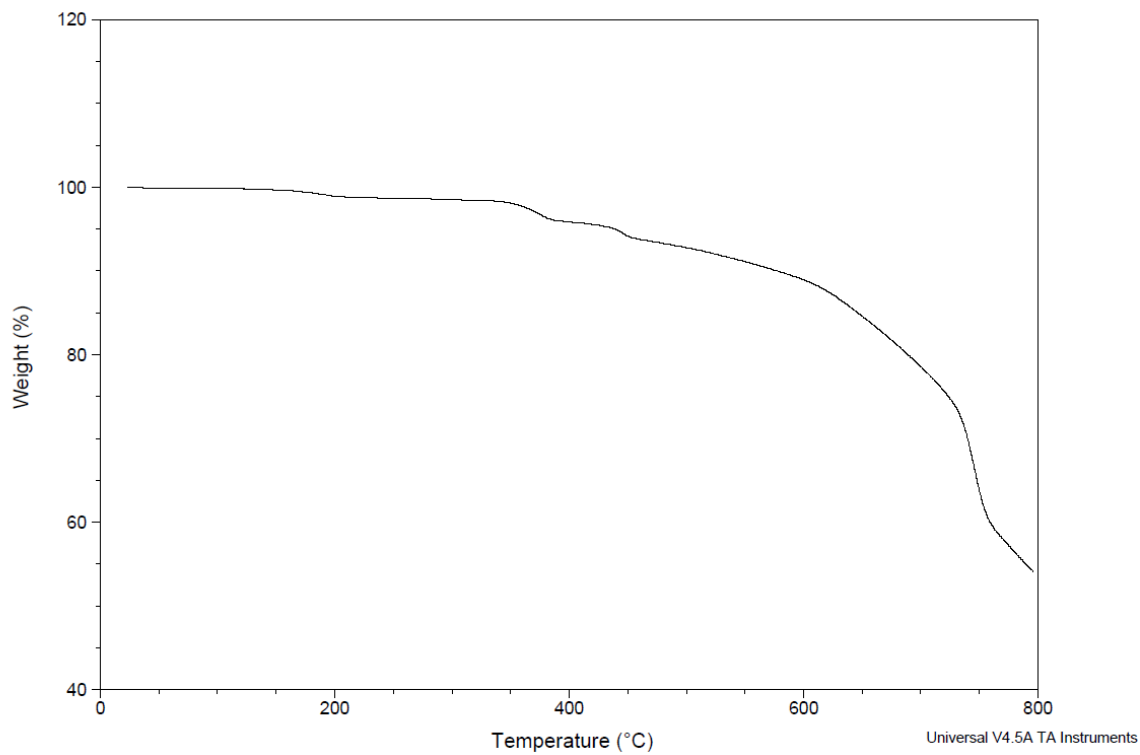

**Figure S43.** Thermogravimetric analysis profile for compound **1**·H<sub>2</sub>O in the 25-800°C range.

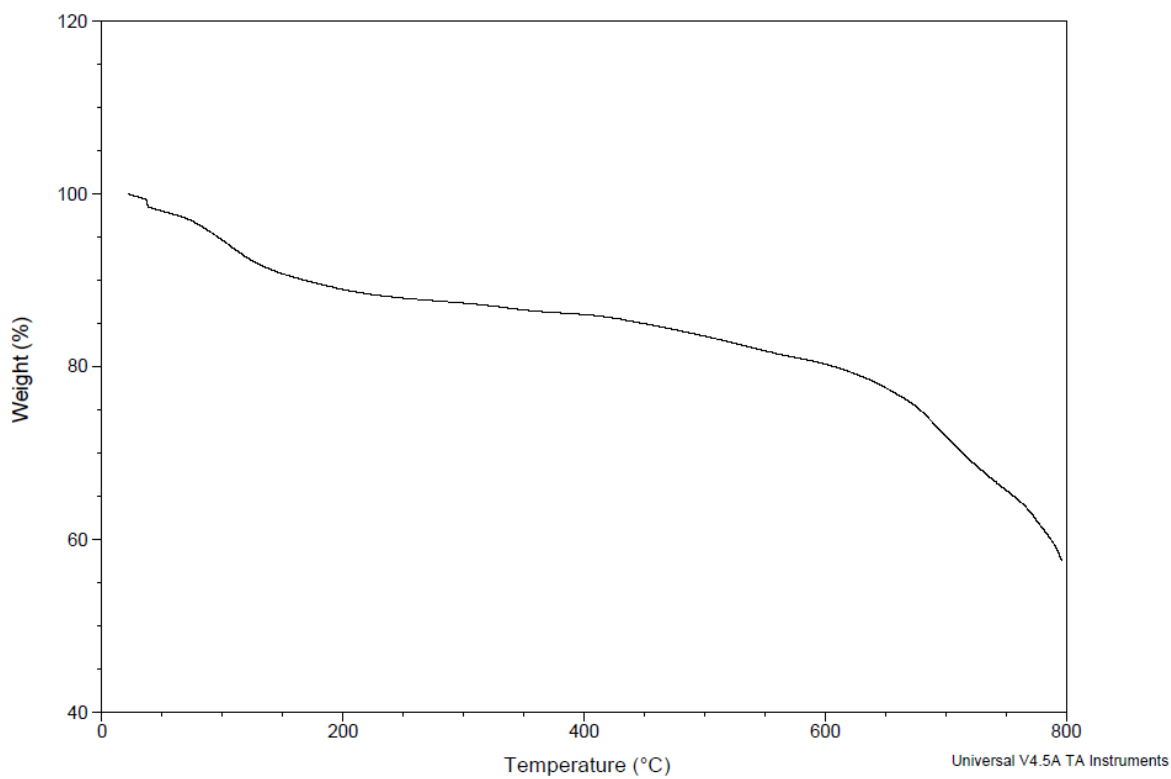

**Figure S44.** Thermogravimetric analysis profile for compound **2** in the 25-800°C range.



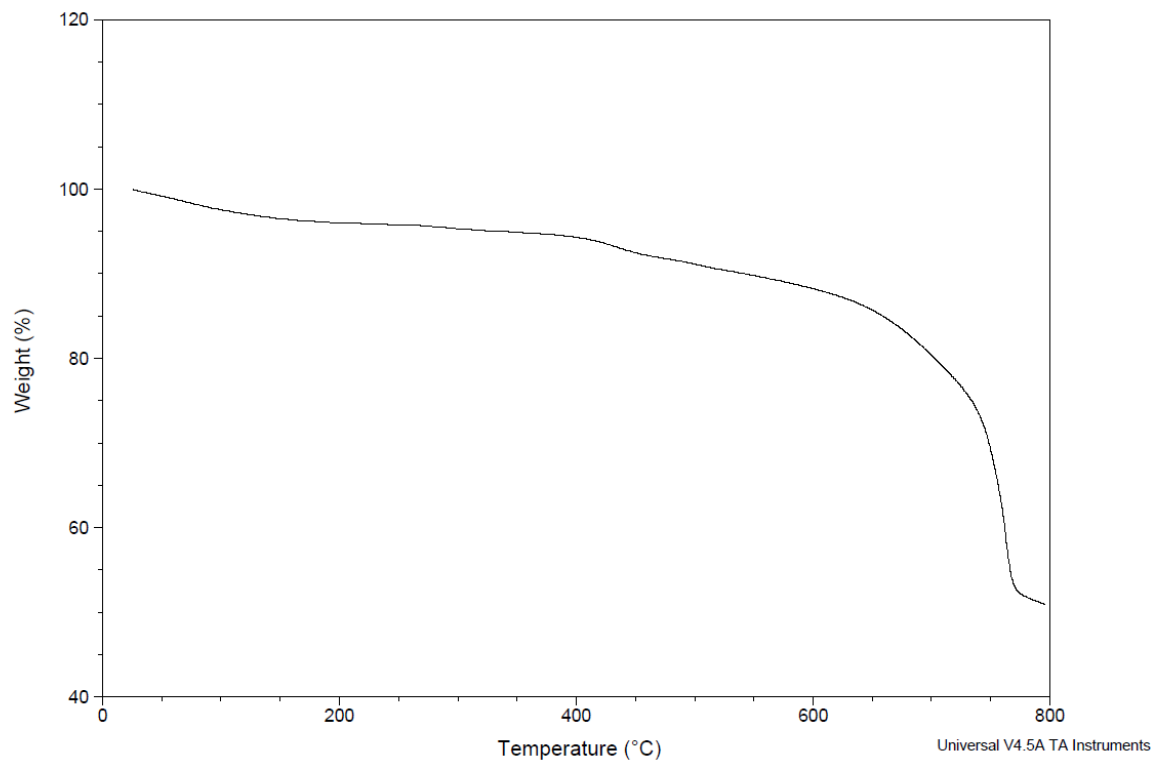

**Figure S45.** Thermogravimetric analysis profile for compound  $3 \cdot \text{H}_2\text{O}$  in the 25-800°C range.

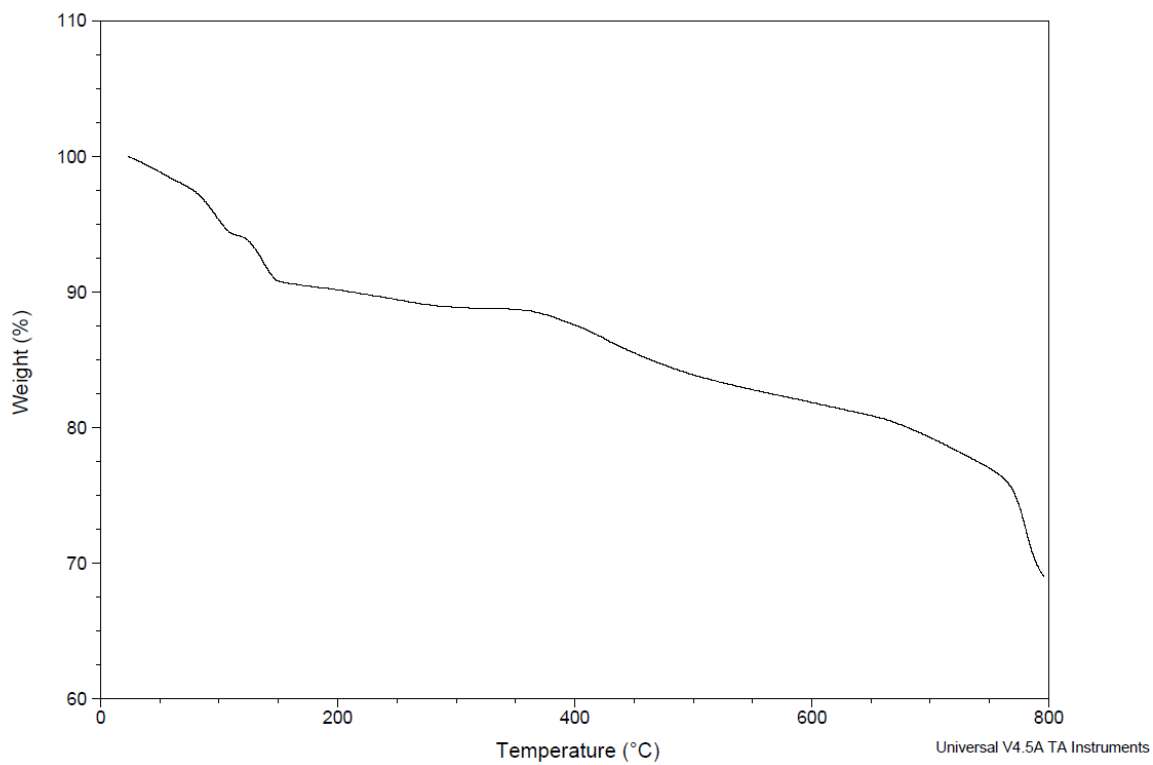

**Figure S46.** Thermogravimetric analysis profile for compound  $4 \cdot 6\text{H}_2\text{O}$  in the 25-800°C range.

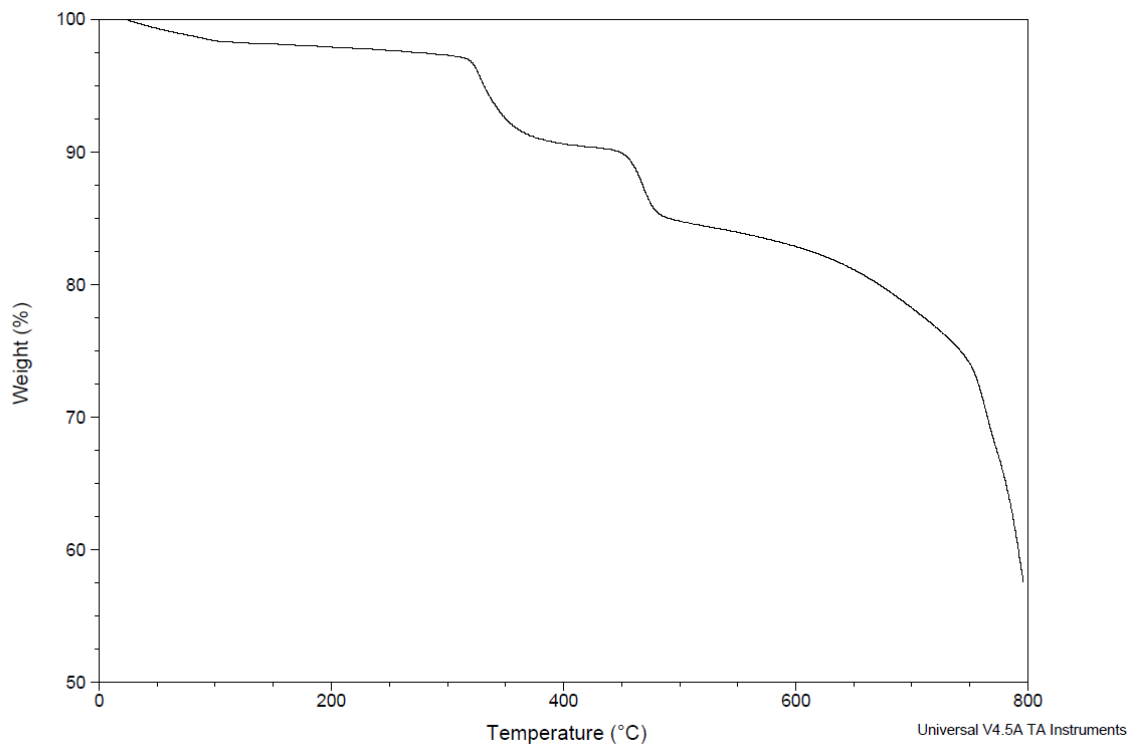

**Figure S47.** Thermogravimetric analysis profile for compound  $5 \cdot 6\text{H}_2\text{O}$  in the 25-800°C range.

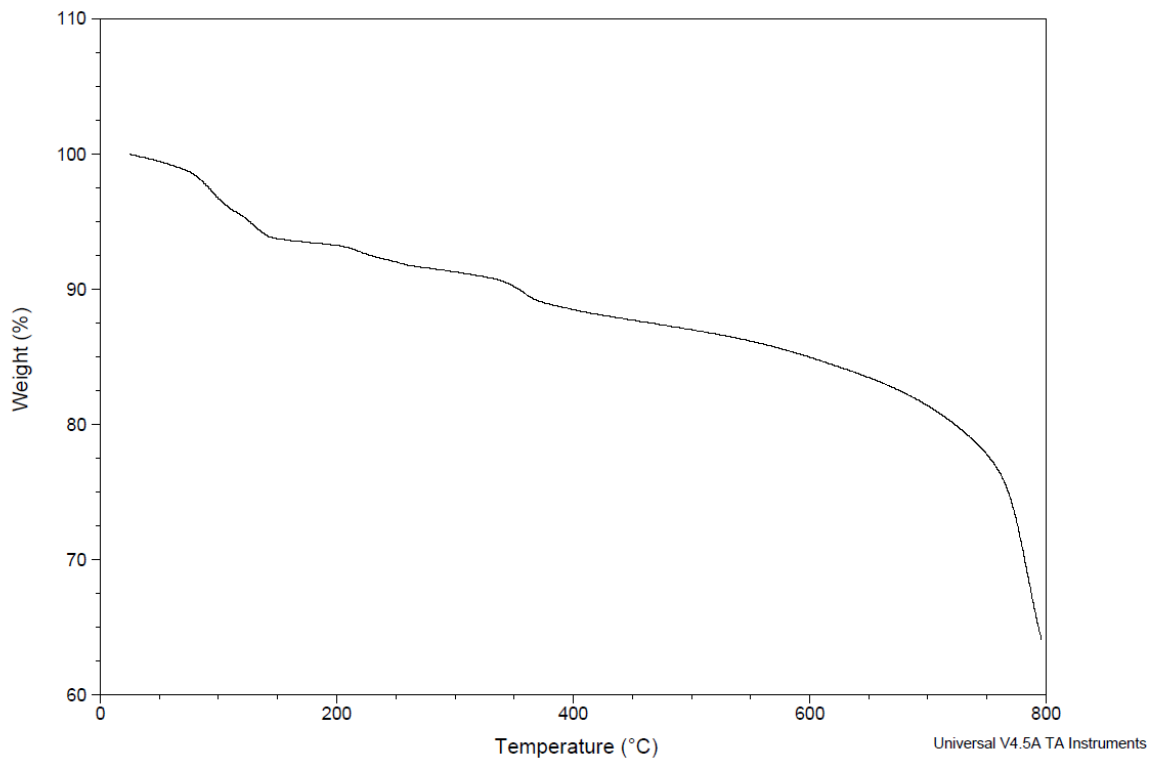

**Figure S48.** Thermogravimetric analysis profile for compound  $6 \cdot 4\text{H}_2\text{O}$  in the 25-800°C range.

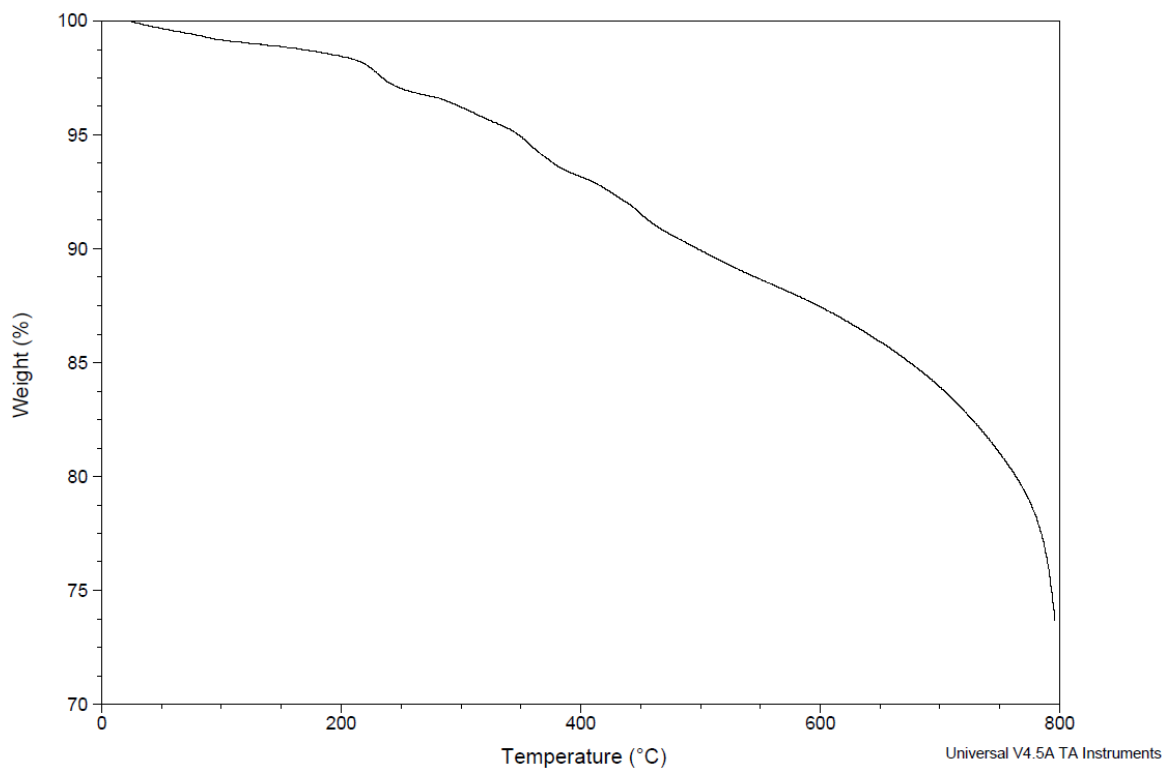

**Figure S49.** Thermogravimetric analysis profile for compound **7** in the 25-800°C range.

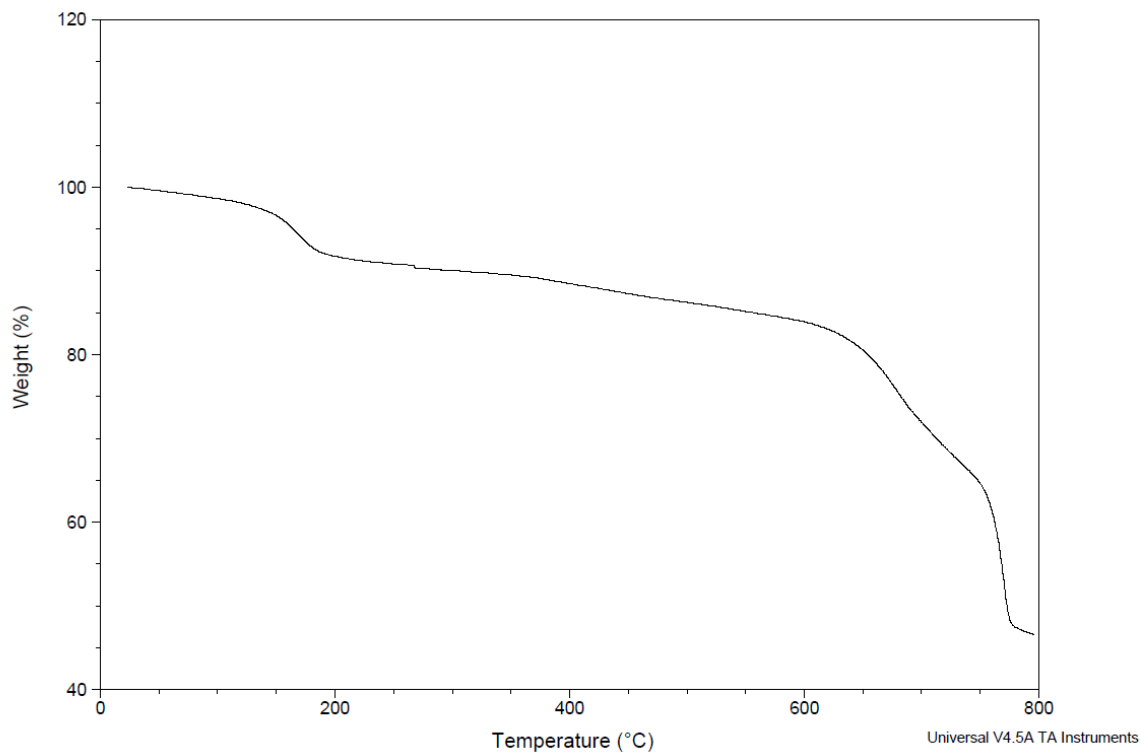

**Figure S50.** Thermogravimetric analysis profile for compound **8·4H<sub>2</sub>O** in the 25-800°C range.

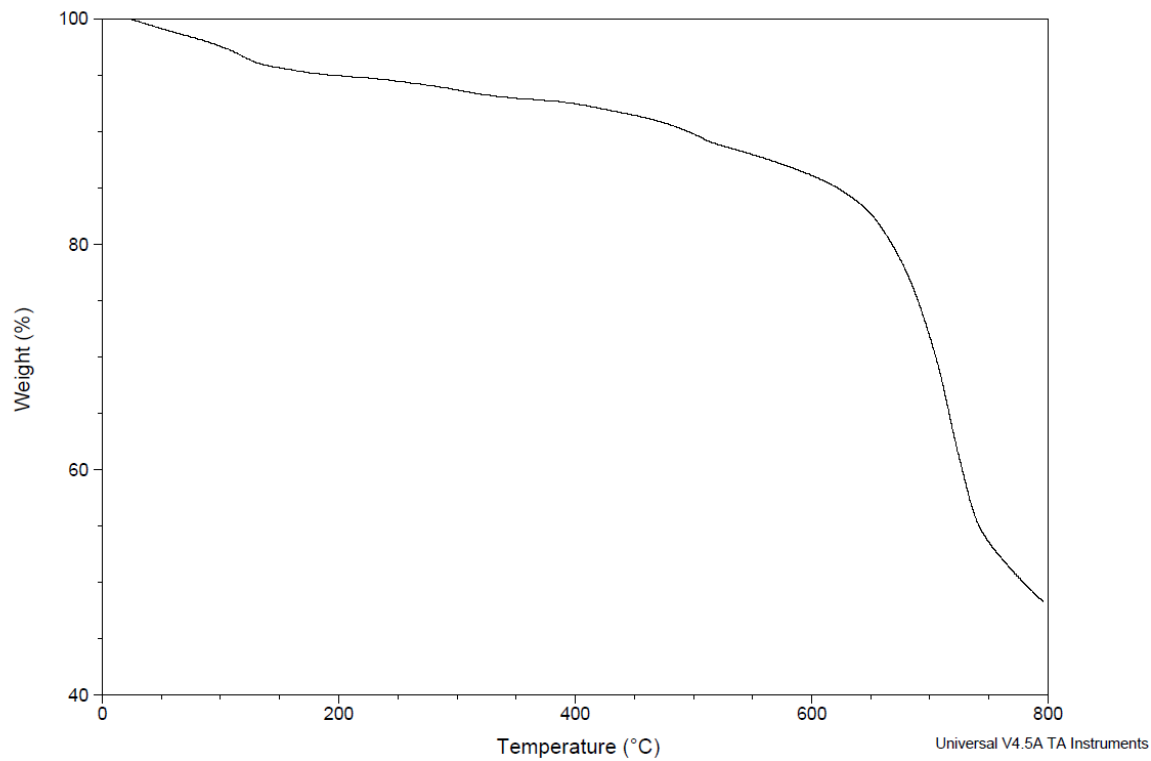

**Figure S51.** Thermogravimetric analysis profile for compound **9**·6H<sub>2</sub>O in the 25-800°C range.

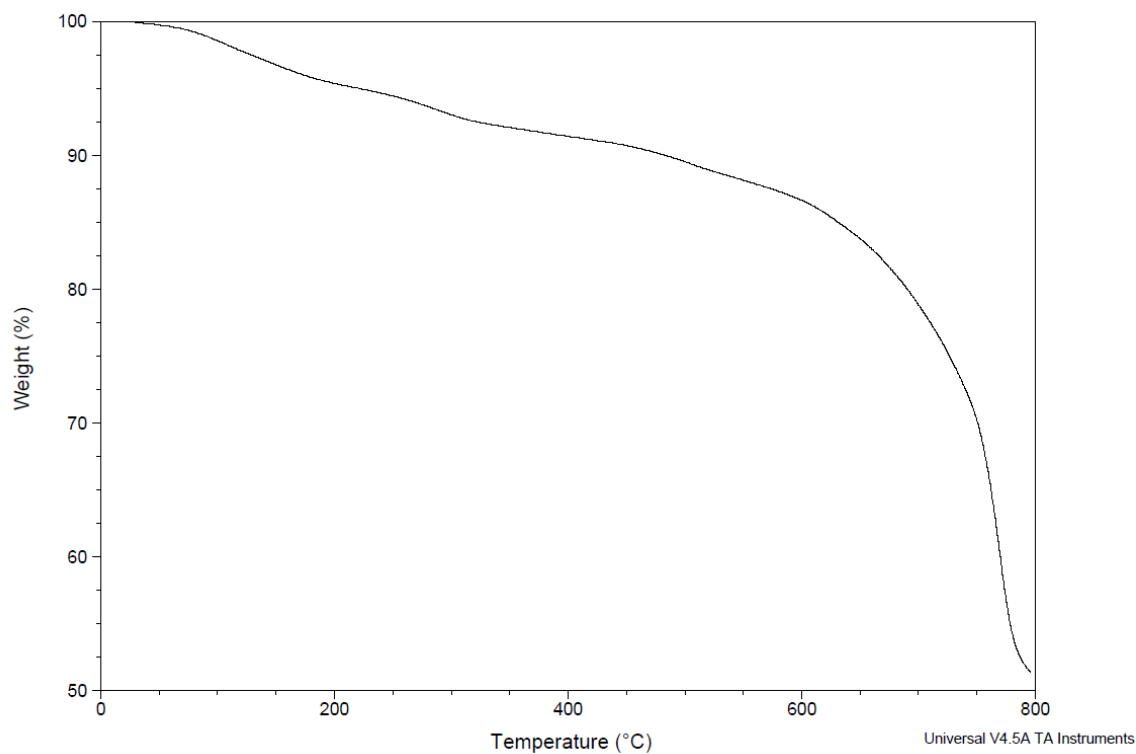

**Figure S52.** Thermogravimetric analysis profile for compound **10**·4H<sub>2</sub>O in the 25-800°C range.

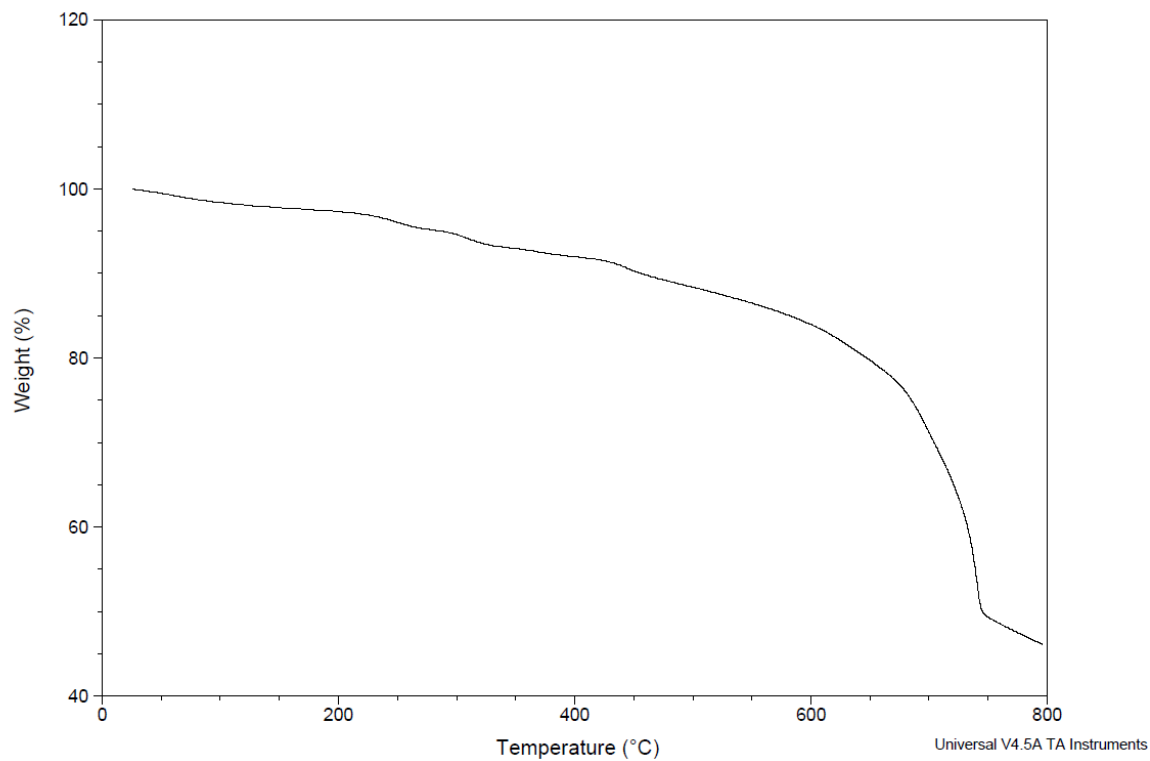

**Figure S53.** Thermogravimetric analysis profile for compound **11**·2H<sub>2</sub>O in the 25-800°C range.

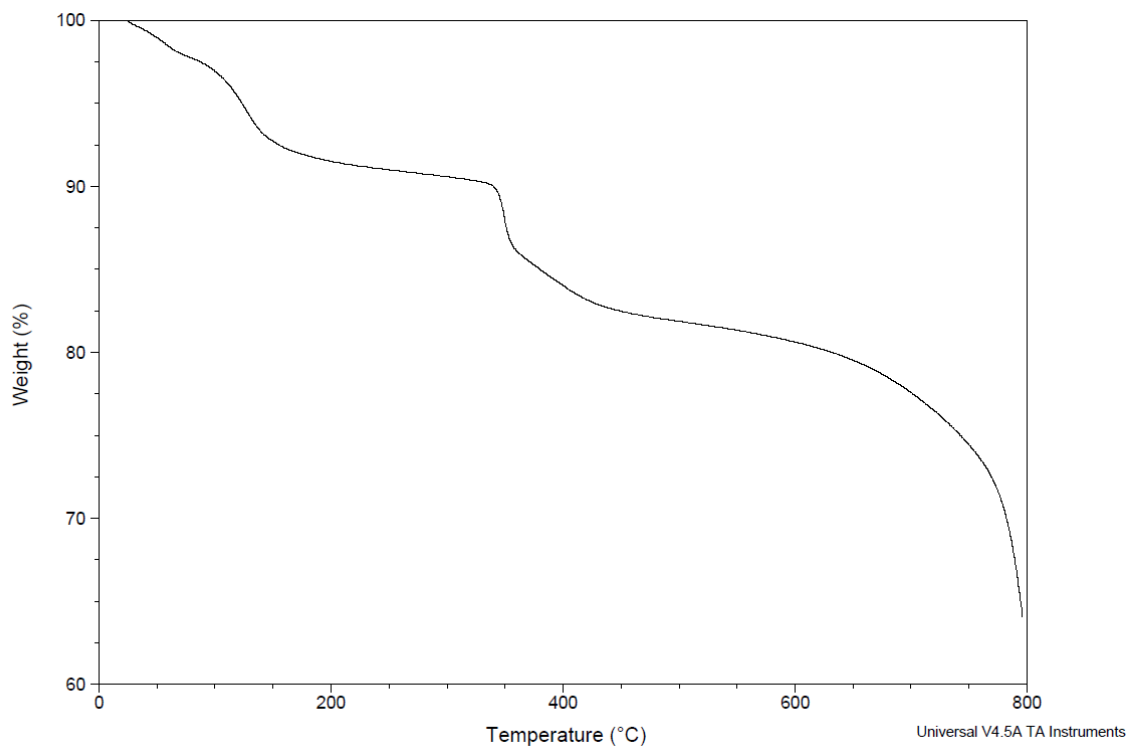

**Figure S54.** Thermogravimetric analysis profile for compound **12**·H<sub>2</sub>O in the 25-800°C range.



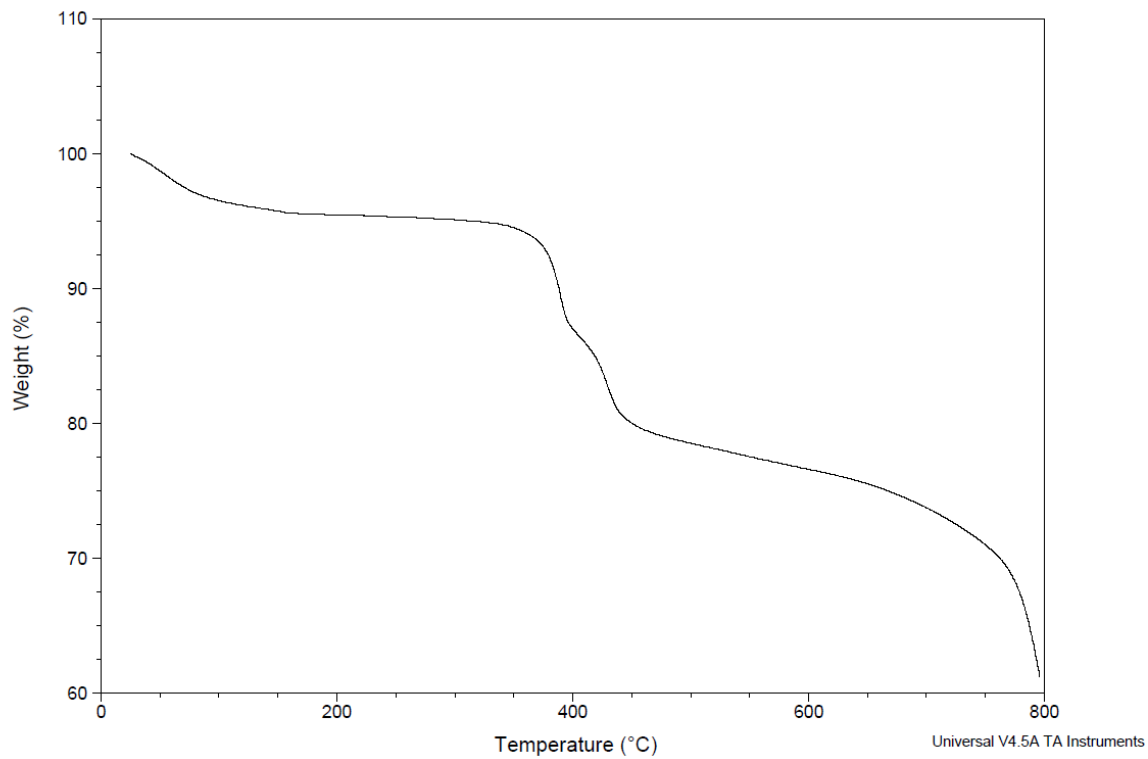

**Figure S55.** Thermogravimetric analysis profile for compound **13**·H<sub>2</sub>O in the 25-800°C range.

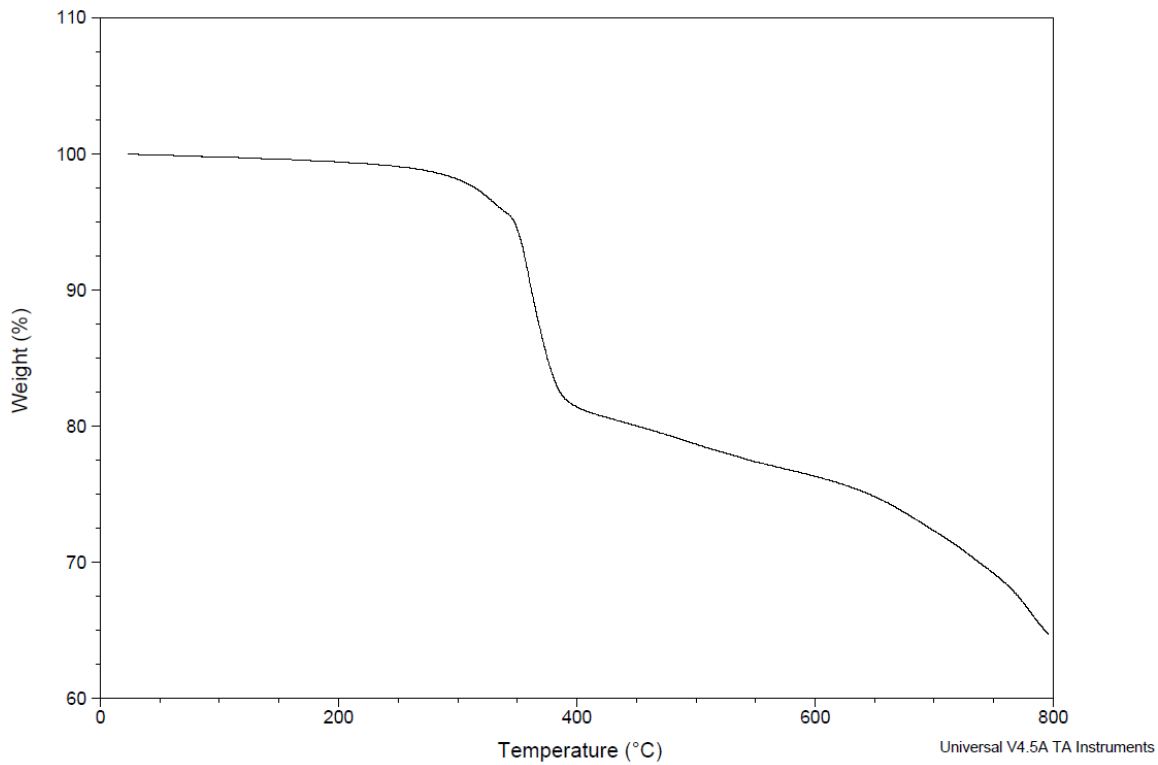

**Figure S56.** Thermogravimetric analysis profile for compound **14** in the 25-800°C range.

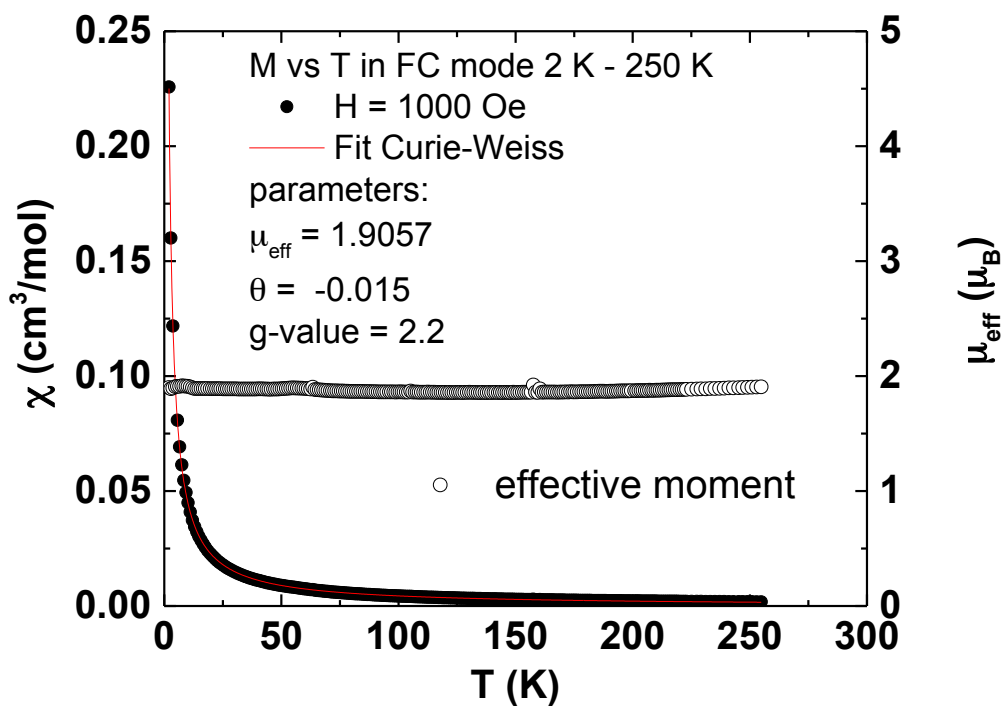

(a)

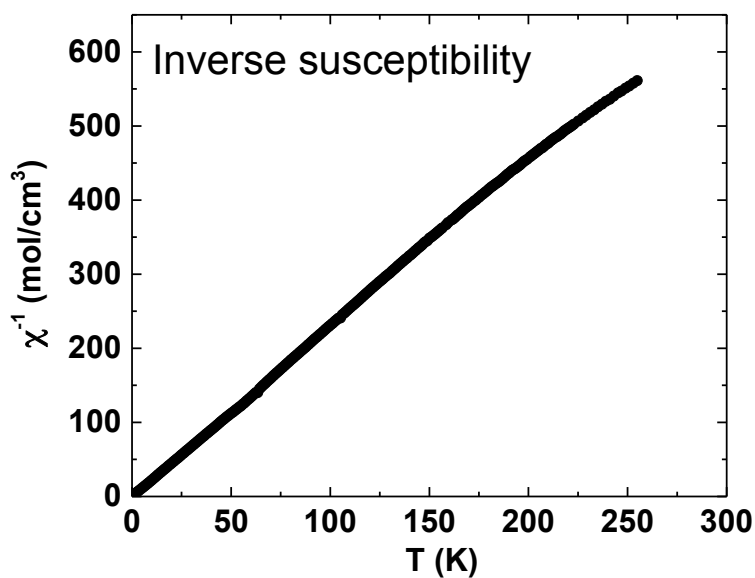

(b)

**Figure S57.** (a) The temperature dependence of the magnetic susceptibility  $\chi$  (filled circles) and of the effective magnetic moment  $\mu_{\text{eff}}$  (open circles) of **5**. The red line is the fit to equation 1. (b) A plot of the inverse susceptibility,  $1/\chi$ , as a function of temperature.

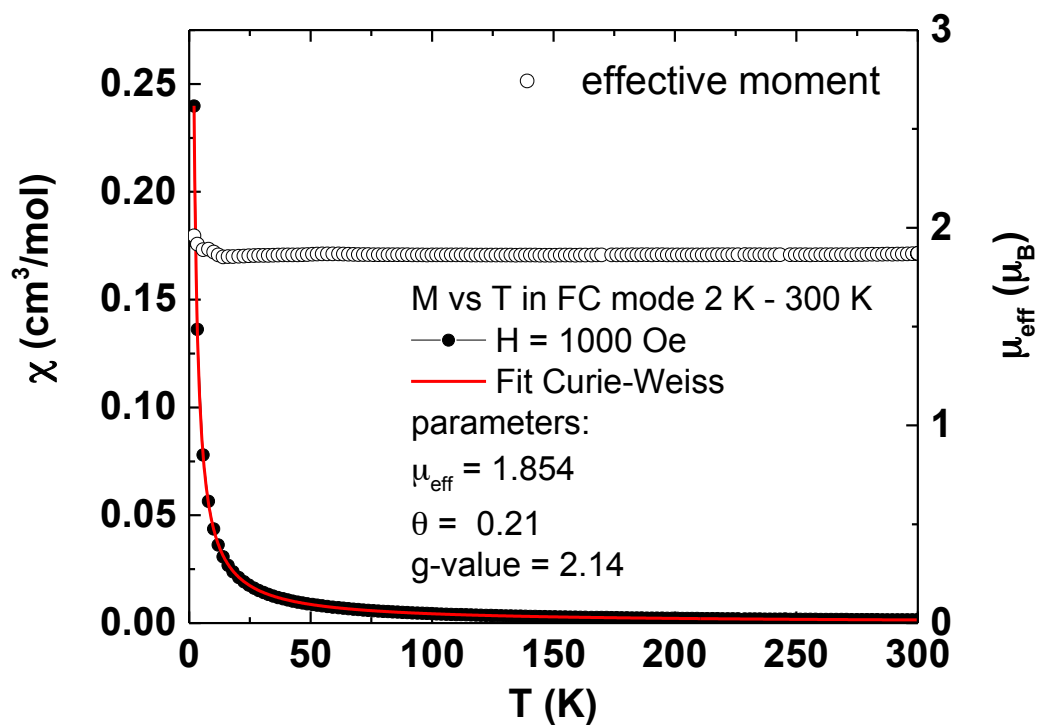

(a)

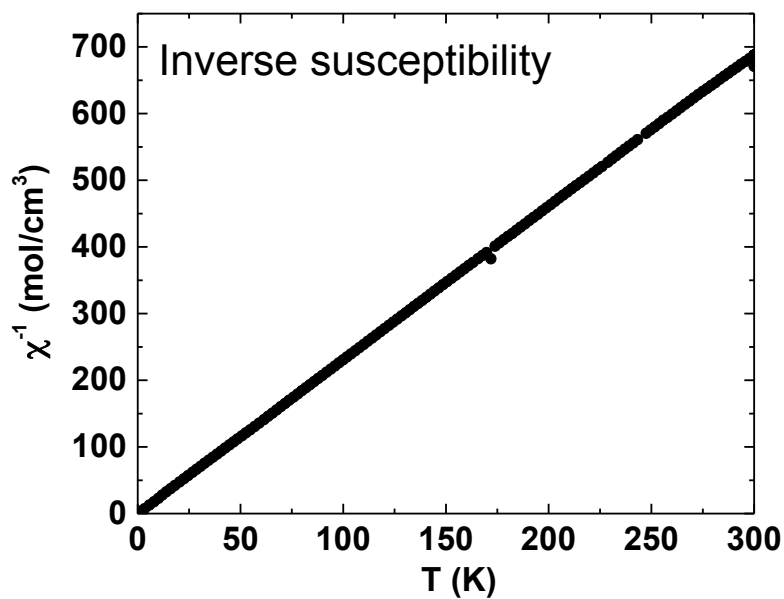

(b)

**Figure S58.** (a) The temperature dependence of the magnetic susceptibility  $\chi$  (filled circles) and of the effective magnetic moment  $\mu_{\text{eff}}$  (open circles) of 14. The red line is the fit to equation 1. (b) A plot of the inverse susceptibility,  $1/\chi$ , as a function of temperature.

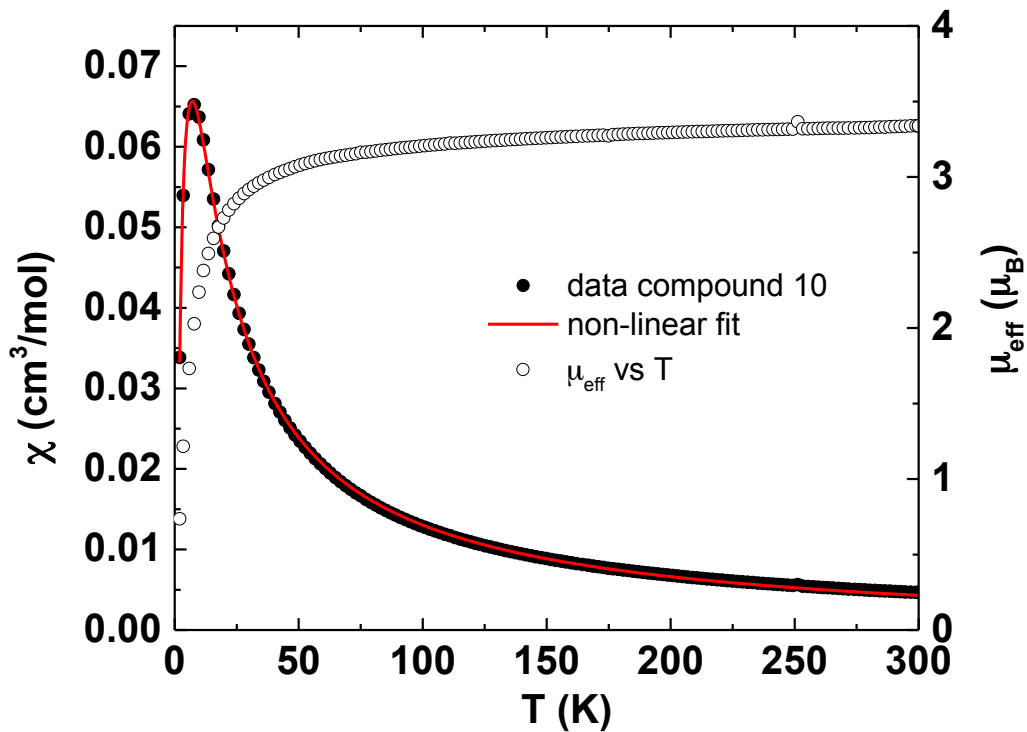

(a)

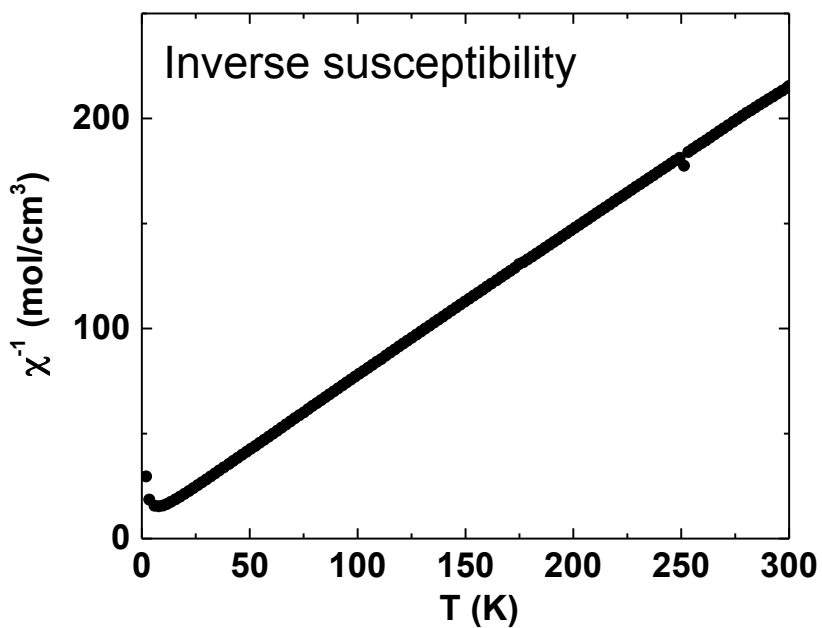

(b)

**Figure S59.** (a) The temperature dependence of the magnetic susceptibility  $\chi$  (filled circles) and of the effective magnetic moment  $\mu_{\text{eff}}$  (open circles) of **10**. The red line is the fit to equation 4. (b) A plot of the inverse susceptibility,  $1/\chi$ , as a function of temperature.

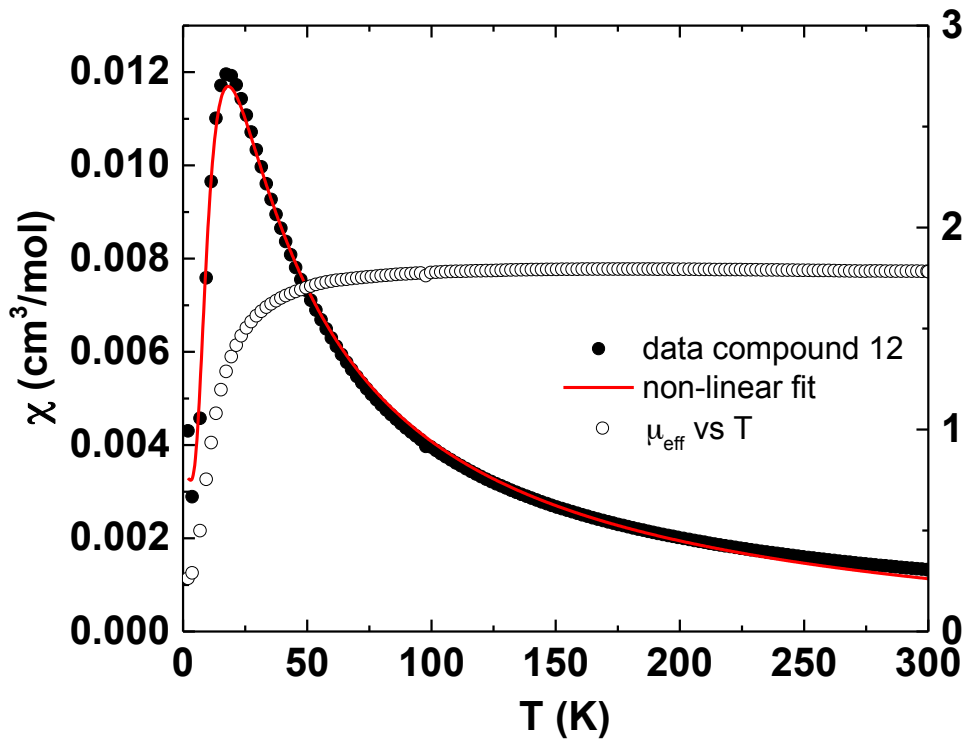

(a)

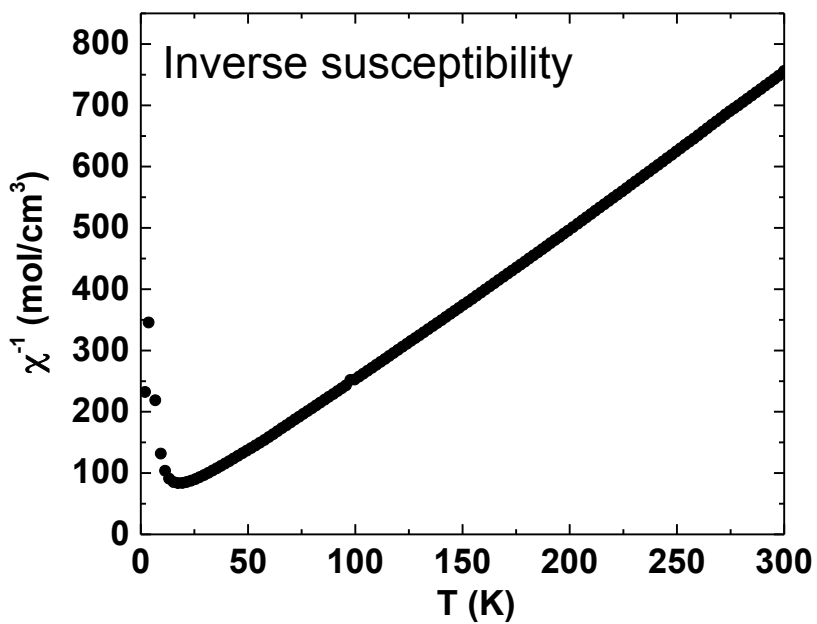

(b)

**Figure S60.** (a) The temperature dependence of the magnetic susceptibility  $\chi$  (filled circles) and of the effective magnetic moment  $\mu_{\text{eff}}$  (open circles) of **12**. The red line is the fit to equation 6. (b) A plot of the inverse susceptibility,  $1/\chi$ , as a function of temperature.



**Table S1.** Sample and crystal data for  $(\text{H}_2\text{-4,4}'\text{dpa})_2[\text{Mo}_5\text{O}_{15}(1,2\text{-O}_3\text{PC}_8\text{H}_8\text{PO}_3)\cdot\text{H}_2\text{O} (1\cdot\text{H}_2\text{O})$ .

|                        |                                                                                                                                        |                              |
|------------------------|----------------------------------------------------------------------------------------------------------------------------------------|------------------------------|
| Identification code    | $(\text{H}_2\text{-4,4}'\text{dpa})_2[\text{Mo}_5\text{O}_{15}(1,2\text{-O}_3\text{PC}_8\text{H}_8\text{PO}_3)\cdot\text{H}_2\text{O}$ |                              |
| Chemical formula       | $\text{C}_{28}\text{H}_{32}\text{Mo}_5\text{N}_6\text{O}_{22}\text{P}_2$                                                               |                              |
| Formula weight         | 1346.23                                                                                                                                |                              |
| Temperature            | 90(2) K                                                                                                                                |                              |
| Wavelength             | 0.71073 Å                                                                                                                              |                              |
| Crystal size           | 0.186 x 0.250 x 0.585 mm                                                                                                               |                              |
| Crystal system         | Monoclinic                                                                                                                             |                              |
| Space group            | P 21/c                                                                                                                                 |                              |
| Unit cell dimensions   | $a = 11.4959(7)$ Å                                                                                                                     | $\alpha = 90^\circ$          |
|                        | $b = 19.4686(12)$ Å                                                                                                                    | $\beta = 105.4640(10)^\circ$ |
|                        | $c = 18.3104(11)$ Å                                                                                                                    | $\gamma = 90^\circ$          |
| Volume                 | $3949.7(4)$ Å <sup>3</sup>                                                                                                             |                              |
| Z                      | 4                                                                                                                                      |                              |
| Density (calculated)   | $2.264$ g/cm <sup>3</sup>                                                                                                              |                              |
| Absorption coefficient | $1.721$ mm <sup>-1</sup>                                                                                                               |                              |
| F(000)                 | 2632                                                                                                                                   |                              |

**Table S2.** Data collection and structure refinement for  $(\text{H}_2\text{-4,4'dpa})_2[\text{Mo}_5\text{O}_{15}(1,2\text{-O}_3\text{PC}_8\text{H}_8\text{PO}_3)\cdot\text{H}_2\text{O} (1\cdot\text{H}_2\text{O})$ .

|                                     |                                                                                     |                           |
|-------------------------------------|-------------------------------------------------------------------------------------|---------------------------|
| Theta range for data collection     | 1.56 to 25.68°                                                                      |                           |
| Index ranges                        | -13<=h<=14, -23<=k<=23, -22<=l<=22                                                  |                           |
| Reflections collected               | 29843                                                                               |                           |
| Independent reflections             | 7495 [R(int) = 0.0123]                                                              |                           |
| Coverage of independent reflections | 99.9%                                                                               |                           |
| Max. and min. transmission          | 0.7400 and 0.4330                                                                   |                           |
| Refinement method                   | Full-matrix least-squares on $F^2$                                                  |                           |
| Refinement program                  | SHELXL-2013 (Sheldrick, 2013)                                                       |                           |
| Function minimized                  | $\Sigma w(F_o^2 - F_c^2)^2$                                                         |                           |
| Data / restraints / parameters      | 7495 / 8 / 598                                                                      |                           |
| Goodness-of-fit on $F^2$            | 0.930                                                                               |                           |
| $\Delta/\sigma_{\text{max}}$        | 0.003                                                                               |                           |
| Final R indices                     | 7165 data; $I > 2\sigma(I)$                                                         | R1 = 0.0154, wR2 = 0.0394 |
|                                     | all data                                                                            | R1 = 0.0165, wR2 = 0.0401 |
| Weighting scheme                    | $w = 1/[\sigma^2(F_o^2) + (0.0178P)^2 + 8.8933P]$<br>where $P = (F_o^2 + 2F_c^2)/3$ |                           |
| Largest diff. peak and hole         | 1.286 and -0.353 $\text{e}\text{\AA}^{-3}$                                          |                           |
| R.M.S. deviation from mean          | 0.066 $\text{e}\text{\AA}^{-3}$                                                     |                           |

**Table S3.** Atomic coordinates and equivalent isotropic atomic displacement parameters ( $\text{\AA}^2$ ) for  $(\text{H}_2\text{-4,4'dpa})_2[\text{Mo}_5\text{O}_{15}(1,2\text{-O}_3\text{PC}_8\text{H}_8\text{PO}_3)\cdot\text{H}_2\text{O} (1\cdot\text{H}_2\text{O})$ .

$U(\text{eq})$  is defined as one third of the trace of the orthogonalized  $U_{ij}$  tensor.

|     | <b>x/a</b>  | <b>y/b</b> | <b>z/c</b> | <b>U(eq)</b> |
|-----|-------------|------------|------------|--------------|
| Mo1 | 0.60957(2)  | 0.67461(2) | 0.34370(2) | 0.00997(4)   |
| Mo2 | 0.64208(2)  | 0.82537(2) | 0.43846(2) | 0.00893(4)   |
| Mo3 | 0.96519(2)  | 0.86512(2) | 0.48018(2) | 0.00901(4)   |
| Mo4 | 0.10245(2)  | 0.71388(2) | 0.47612(2) | 0.01001(4)   |
| Mo5 | 0.88814(2)  | 0.60093(2) | 0.38125(2) | 0.01049(4)   |
| P1  | 0.83474(4)  | 0.70650(3) | 0.51705(3) | 0.00882(10)  |
| P2  | 0.84865(4)  | 0.77302(3) | 0.32856(3) | 0.00912(10)  |
| O1  | 0.54275(13) | 0.60336(8) | 0.36913(9) | 0.0168(3)    |
| O2  | 0.52195(13) | 0.69634(8) | 0.25593(8) | 0.0172(3)    |
| O3  | 0.55743(12) | 0.73885(7) | 0.40812(8) | 0.0120(3)    |
| O4  | 0.73120(12) | 0.76371(7) | 0.35408(8) | 0.0099(3)    |
| O5  | 0.73829(12) | 0.63075(7) | 0.31114(8) | 0.0119(3)    |
| O6  | 0.78137(12) | 0.65473(7) | 0.45308(8) | 0.0105(3)    |
| O7  | 0.73765(12) | 0.75280(7) | 0.53090(8) | 0.0107(3)    |
| O8  | 0.56713(12) | 0.85447(7) | 0.50233(8) | 0.0133(3)    |
| O9  | 0.57575(13) | 0.87331(7) | 0.36019(8) | 0.0137(3)    |
| O10 | 0.79251(12) | 0.86962(7) | 0.46651(8) | 0.0108(3)    |
| O11 | 0.00722(13) | 0.87143(8) | 0.57679(8) | 0.0147(3)    |

|     | <b>x/a</b>  | <b>y/b</b>  | <b>z/c</b>  | <b>U(eq)</b> |
|-----|-------------|-------------|-------------|--------------|
| O12 | 0.00007(13) | 0.94363(8)  | 0.45147(8)  | 0.0146(3)    |
| O13 | 0.90586(12) | 0.84077(7)  | 0.35816(8)  | 0.0109(3)    |
| O14 | 0.93493(12) | 0.74982(7)  | 0.49697(8)  | 0.0102(3)    |
| O15 | 0.10185(12) | 0.81218(7)  | 0.46379(8)  | 0.0110(3)    |
| O16 | 0.17570(13) | 0.70690(8)  | 0.56938(8)  | 0.0153(3)    |
| O17 | 0.21059(13) | 0.69891(8)  | 0.42857(9)  | 0.0172(3)    |
| O18 | 0.02074(12) | 0.62625(7)  | 0.46217(8)  | 0.0121(3)    |
| O19 | 0.93637(12) | 0.71270(7)  | 0.35500(8)  | 0.0114(3)    |
| O20 | 0.95343(13) | 0.57468(8)  | 0.31174(8)  | 0.0158(3)    |
| O21 | 0.84375(13) | 0.52470(8)  | 0.41231(8)  | 0.0160(3)    |
| O90 | 0.1354(2)   | 0.84473(13) | 0.78029(12) | 0.0440(5)    |
| N1  | 0.17093(16) | 0.65397(10) | 0.83799(10) | 0.0147(4)    |
| N2  | 0.29731(16) | 0.58754(9)  | 0.65910(10) | 0.0129(3)    |
| N3  | 0.50990(17) | 0.66055(11) | 0.52712(11) | 0.0196(4)    |
| N4  | 0.23395(17) | 0.89869(10) | 0.67951(10) | 0.0177(4)    |
| N5  | 0.35751(16) | 0.93131(9)  | 0.49125(10) | 0.0134(4)    |
| N6  | 0.28538(16) | 0.07672(9)  | 0.32250(10) | 0.0144(4)    |
| C1  | 0.91177(18) | 0.66165(11) | 0.60232(11) | 0.0126(4)    |
| C2  | 0.82881(18) | 0.62250(11) | 0.63861(11) | 0.0133(4)    |
| C3  | 0.8003(2)   | 0.55493(12) | 0.61434(12) | 0.0205(5)    |
| C4  | 0.7203(2)   | 0.51619(12) | 0.64149(13) | 0.0246(5)    |

|     | <b>x/a</b>  | <b>y/b</b>  | <b>z/c</b>  | <b>U(eq)</b> |
|-----|-------------|-------------|-------------|--------------|
| C5  | 0.77801(18) | 0.65113(11) | 0.69348(11) | 0.0123(4)    |
| C6  | 0.69587(19) | 0.61125(12) | 0.71946(12) | 0.0169(4)    |
| C7  | 0.6660(2)   | 0.54523(12) | 0.69334(12) | 0.0213(5)    |
| C8  | 0.80858(19) | 0.77710(11) | 0.22547(11) | 0.0142(4)    |
| C9  | 0.11041(19) | 0.60605(11) | 0.78948(12) | 0.0145(4)    |
| C10 | 0.15270(18) | 0.58451(11) | 0.73012(12) | 0.0133(4)    |
| C11 | 0.27405(19) | 0.68116(11) | 0.83008(12) | 0.0162(4)    |
| C12 | 0.25935(18) | 0.61302(11) | 0.71902(11) | 0.0122(4)    |
| C13 | 0.32102(19) | 0.66196(11) | 0.77166(12) | 0.0141(4)    |
| C14 | 0.37309(18) | 0.61452(11) | 0.61944(12) | 0.0130(4)    |
| C15 | 0.3876(2)   | 0.57456(12) | 0.55839(12) | 0.0185(4)    |
| C16 | 0.43322(19) | 0.67769(11) | 0.63308(12) | 0.0149(4)    |
| C17 | 0.4559(2)   | 0.59913(13) | 0.51317(13) | 0.0222(5)    |
| C18 | 0.50060(19) | 0.69907(12) | 0.58563(12) | 0.0170(4)    |
| C19 | 0.28432(19) | 0.84742(12) | 0.65036(12) | 0.0173(4)    |
| C20 | 0.21965(19) | 0.96125(12) | 0.64817(12) | 0.0163(4)    |
| C21 | 0.32503(19) | 0.85788(11) | 0.58765(12) | 0.0153(4)    |
| C22 | 0.25921(18) | 0.97553(11) | 0.58553(11) | 0.0131(4)    |
| C23 | 0.31226(17) | 0.92277(11) | 0.55379(11) | 0.0123(4)    |
| C24 | 0.32989(18) | 0.98099(10) | 0.43639(11) | 0.0116(4)    |
| C25 | 0.22412(18) | 0.02037(10) | 0.42003(11) | 0.0116(4)    |



|     | <b>x/a</b>  | <b>y/b</b>  | <b>z/c</b>  | <b>U(eq)</b> |
|-----|-------------|-------------|-------------|--------------|
| C26 | 0.41063(18) | 0.99002(11) | 0.39126(12) | 0.0139(4)    |
| C27 | 0.20538(18) | 0.06824(11) | 0.36350(11) | 0.0135(4)    |
| C28 | 0.38539(19) | 0.03791(11) | 0.33491(12) | 0.0154(4)    |

**Table S4.** Bond lengths (Å) for (H<sub>2</sub>-4,4'dpa)<sub>2</sub>[Mo<sub>5</sub>O<sub>15</sub>(1,2-O<sub>3</sub>PC<sub>8</sub>H<sub>8</sub>PO<sub>3</sub>)·H<sub>2</sub>O (1·H<sub>2</sub>O).

|          |            |          |            |
|----------|------------|----------|------------|
| Mo1-O2   | 1.7067(15) | Mo1-O1   | 1.7094(15) |
| Mo1-O3   | 1.9214(14) | Mo1-O5   | 1.9352(14) |
| Mo1-O4   | 2.2041(14) | Mo1-O6   | 2.4397(14) |
| Mo2-O9   | 1.7099(14) | Mo2-O8   | 1.7229(14) |
| Mo2-O10  | 1.8770(14) | Mo2-O3   | 1.9504(14) |
| Mo2-O7   | 2.2531(14) | Mo2-O4   | 2.3921(13) |
| Mo3-O12  | 1.6989(15) | Mo3-O11  | 1.7093(14) |
| Mo3-O10  | 1.9354(14) | Mo3-O15  | 1.9677(14) |
| Mo3-O13  | 2.2066(14) | Mo3-O14  | 2.3046(14) |
| Mo4-O16  | 1.6961(15) | Mo4-O17  | 1.7221(14) |
| Mo4-O15  | 1.9269(14) | Mo4-O18  | 1.9313(14) |
| Mo4-O14  | 2.1763(13) | Mo4-O19  | 2.5113(14) |
| Mo5-O21  | 1.7149(15) | Mo5-O20  | 1.7186(14) |
| Mo5-O18  | 1.8862(14) | Mo5-O5   | 1.9426(14) |
| Mo5-O6   | 2.2792(13) | Mo5-O19  | 2.3273(14) |
| P1-O7    | 1.5078(14) | P1-O6    | 1.5430(14) |
| P1-O14   | 1.5488(14) | P1-C1    | 1.802(2)   |
| P2-O13   | 1.5087(15) | P2-O19   | 1.5394(15) |
| P2-O4    | 1.5526(14) | P2-C8    | 1.821(2)   |
| O90-H90A | 0.870(18)  | O90-H90B | 0.919(18)  |
| N1-C11   | 1.341(3)   | N1-C9    | 1.347(3)   |

|         |           |         |           |
|---------|-----------|---------|-----------|
| N1-H1'  | 0.863(17) | N2-C12  | 1.377(3)  |
| N2-C14  | 1.378(3)  | N2-H2'  | 0.851(17) |
| N3-C18  | 1.335(3)  | N3-C17  | 1.340(3)  |
| N3-H3'  | 0.859(17) | N4-C19  | 1.335(3)  |
| N4-C20  | 1.338(3)  | N4-H4'  | 0.859(17) |
| N5-C24  | 1.369(3)  | N5-C23  | 1.388(3)  |
| N5-H5'  | 0.851(17) | N6-C28  | 1.344(3)  |
| N6-C27  | 1.343(3)  | N6-H6'  | 0.872(17) |
| C1-C2   | 1.507(3)  | C1-H1A  | 0.99      |
| C1-H1B  | 0.99      | C2-C3   | 1.399(3)  |
| C2-C5   | 1.405(3)  | C3-C4   | 1.381(3)  |
| C3-H3   | 0.95      | C4-C7   | 1.388(3)  |
| C4-H4   | 0.95      | C5-C6   | 1.400(3)  |
| C5-C8   | 1.520(3)  | C6-C7   | 1.383(3)  |
| C6-H6   | 0.95      | C7-H7   | 0.95      |
| C8-C5   | 1.520(3)  | C8-H8A  | 0.99      |
| C8-H8B  | 0.99      | C9-C10  | 1.370(3)  |
| C9-H9   | 0.95      | C10-C12 | 1.409(3)  |
| C10-H10 | 0.95      | C11-C13 | 1.372(3)  |
| C11-H11 | 0.95      | C12-C13 | 1.405(3)  |
| C13-H13 | 0.95      | C14-C16 | 1.400(3)  |
| C14-C15 | 1.408(3)  | C15-C17 | 1.370(3)  |

|         |          |         |          |
|---------|----------|---------|----------|
| C15-H15 | 0.95     | C16-C18 | 1.374(3) |
| C16-H16 | 0.95     | C17-H17 | 0.95     |
| C18-H18 | 0.95     | C19-C21 | 1.366(3) |
| C19-H19 | 0.95     | C20-C22 | 1.370(3) |
| C20-H20 | 0.95     | C21-C23 | 1.398(3) |
| C21-H21 | 0.95     | C22-C23 | 1.398(3) |
| C22-H22 | 0.95     | C24-C25 | 1.401(3) |
| C24-C26 | 1.409(3) | C25-C27 | 1.367(3) |
| C25-H25 | 0.95     | C26-C28 | 1.363(3) |
| C26-H26 | 0.95     | C27-H27 | 0.95     |
| C28-H28 | 0.95     |         |          |

**Table S5.** Bond angles (°) for  $(\text{H}_2\text{-4,4'dpa})_2[\text{Mo}_5\text{O}_{15}(1,2\text{-O}_3\text{PC}_8\text{H}_8\text{PO}_3)\cdot\text{H}_2\text{O} (1\cdot\text{H}_2\text{O})$ .

|             |           |             |           |
|-------------|-----------|-------------|-----------|
| O2-Mo1-O1   | 105.21(7) | O2-Mo1-O3   | 102.38(7) |
| O1-Mo1-O3   | 97.16(6)  | O2-Mo1-O5   | 97.30(7)  |
| O1-Mo1-O5   | 99.32(7)  | O3-Mo1-O5   | 149.96(6) |
| O2-Mo1-O4   | 95.03(6)  | O1-Mo1-O4   | 159.38(6) |
| O3-Mo1-O4   | 74.30(5)  | O5-Mo1-O4   | 81.62(5)  |
| O2-Mo1-O6   | 163.26(6) | O1-Mo1-O6   | 88.39(6)  |
| O3-Mo1-O6   | 85.18(5)  | O5-Mo1-O6   | 70.42(5)  |
| O4-Mo1-O6   | 72.42(5)  | O9-Mo2-O8   | 101.39(7) |
| O9-Mo2-O10  | 98.69(7)  | O8-Mo2-O10  | 104.74(6) |
| O9-Mo2-O3   | 98.95(7)  | O8-Mo2-O3   | 100.11(6) |
| O10-Mo2-O3  | 145.85(6) | O9-Mo2-O7   | 172.34(6) |
| O8-Mo2-O7   | 85.89(6)  | O10-Mo2-O7  | 81.55(6)  |
| O3-Mo2-O7   | 77.22(6)  | O9-Mo2-O4   | 84.53(6)  |
| O8-Mo2-O4   | 168.90(6) | O10-Mo2-O4  | 83.40(5)  |
| O3-Mo2-O4   | 69.50(5)  | O7-Mo2-O4   | 87.91(5)  |
| O12-Mo3-O11 | 103.33(7) | O12-Mo3-O10 | 103.75(6) |
| O11-Mo3-O10 | 97.34(6)  | O12-Mo3-O15 | 99.22(6)  |
| O11-Mo3-O15 | 100.29(6) | O10-Mo3-O15 | 146.83(6) |
| O12-Mo3-O13 | 85.10(6)  | O11-Mo3-O13 | 171.51(6) |
| O10-Mo3-O13 | 81.33(5)  | O15-Mo3-O13 | 77.11(5)  |
| O12-Mo3-O14 | 166.94(6) | O11-Mo3-O14 | 86.74(6)  |

|             |           |             |           |
|-------------|-----------|-------------|-----------|
| O10-Mo3-O14 | 82.84(5)  | O15-Mo3-O14 | 70.44(5)  |
| O13-Mo3-O14 | 84.78(5)  | O16-Mo4-O17 | 105.31(7) |
| O16-Mo4-O15 | 100.54(7) | O17-Mo4-O15 | 95.13(7)  |
| O16-Mo4-O18 | 98.96(7)  | O17-Mo4-O18 | 100.07(7) |
| O15-Mo4-O18 | 151.09(6) | O16-Mo4-O14 | 94.25(6)  |
| O17-Mo4-O14 | 159.22(6) | O15-Mo4-O14 | 74.07(5)  |
| O18-Mo4-O14 | 83.41(6)  | O16-Mo4-O19 | 160.89(6) |
| O17-Mo4-O19 | 91.91(6)  | O15-Mo4-O19 | 85.83(5)  |
| O18-Mo4-O19 | 69.31(5)  | O14-Mo4-O19 | 69.99(5)  |
| O21-Mo5-O20 | 102.45(7) | O21-Mo5-O18 | 102.43(7) |
| O20-Mo5-O18 | 103.79(7) | O21-Mo5-O5  | 100.84(7) |
| O20-Mo5-O5  | 94.87(6)  | O18-Mo5-O5  | 146.05(6) |
| O21-Mo5-O6  | 87.29(6)  | O20-Mo5-O6  | 166.59(6) |
| O18-Mo5-O6  | 82.72(5)  | O5-Mo5-O6   | 74.03(5)  |
| O21-Mo5-O19 | 170.41(6) | O20-Mo5-O19 | 87.13(6)  |
| O18-Mo5-O19 | 74.38(5)  | O5-Mo5-O19  | 78.58(5)  |
| O6-Mo5-O19  | 83.34(5)  | O7-P1-O6    | 110.84(8) |
| O7-P1-O14   | 110.19(8) | O6-P1-O14   | 110.23(8) |
| O7-P1-C1    | 111.02(9) | O6-P1-C1    | 110.20(9) |
| O14-P1-C1   | 104.17(9) | O13-P2-O19  | 111.57(8) |
| O13-P2-O4   | 108.95(8) | O19-P2-O4   | 111.45(8) |
| O13-P2-C8   | 107.44(9) | O19-P2-C8   | 108.82(9) |



|               |            |             |            |
|---------------|------------|-------------|------------|
| O4-P2-C8      | 108.49(9)  | Mo1-O3-Mo2  | 121.56(7)  |
| P2-O4-Mo1     | 130.42(8)  | P2-O4-Mo2   | 133.82(8)  |
| Mo1-O4-Mo2    | 94.56(5)   | Mo1-O5-Mo5  | 122.99(7)  |
| P1-O6-Mo5     | 124.89(8)  | P1-O6-Mo1   | 126.19(8)  |
| Mo5-O6-Mo1    | 92.40(5)   | P1-O7-Mo2   | 118.88(8)  |
| Mo2-O10-Mo3   | 148.54(8)  | P2-O13-Mo3  | 122.61(8)  |
| P1-O14-Mo4    | 127.99(8)  | P1-O14-Mo3  | 135.25(8)  |
| Mo4-O14-Mo3   | 96.76(5)   | Mo4-O15-Mo3 | 118.71(7)  |
| Mo5-O18-Mo4   | 126.69(7)  | P2-O19-Mo5  | 127.30(8)  |
| P2-O19-Mo4    | 123.42(8)  | Mo5-O19-Mo4 | 89.60(5)   |
| H90A-O90-H90B | 86.(3)     | C11-N1-C9   | 121.22(18) |
| C11-N1-H1'    | 117.(2)    | C9-N1-H1'   | 122.(2)    |
| C12-N2-C14    | 131.43(19) | C12-N2-H2'  | 112.6(17)  |
| C14-N2-H2'    | 114.5(17)  | C18-N3-C17  | 121.46(19) |
| C18-N3-H3'    | 117.8(19)  | C17-N3-H3'  | 120.3(19)  |
| C19-N4-C20    | 121.76(19) | C19-N4-H4'  | 118.(2)    |
| C20-N4-H4'    | 120.(2)    | C24-N5-C23  | 128.69(18) |
| C24-N5-H5'    | 116.1(19)  | C23-N5-H5'  | 114.5(19)  |
| C28-N6-C27    | 121.26(19) | C28-N6-H6'  | 117.1(18)  |
| C27-N6-H6'    | 121.0(18)  | C2-C1-P1    | 113.87(14) |
| C2-C1-H1A     | 108.8      | P1-C1-H1A   | 108.8      |
| C2-C1-H1B     | 108.8      | P1-C1-H1B   | 108.8      |

|             |            |             |            |
|-------------|------------|-------------|------------|
| H1A-C1-H1B  | 107.7      | C3-C2-C5    | 119.6(2)   |
| C3-C2-C1    | 117.23(19) | C5-C2-C1    | 123.19(19) |
| C4-C3-C2    | 121.4(2)   | C4-C3-H3    | 119.3      |
| C2-C3-H3    | 119.3      | C3-C4-C7    | 119.2(2)   |
| C3-C4-H4    | 120.4      | C7-C4-H4    | 120.4      |
| C6-C5-C2    | 118.0(2)   | C6-C5-C8    | 119.11(18) |
| C2-C5-C8    | 122.88(18) | C7-C6-C5    | 121.7(2)   |
| C7-C6-H6    | 119.1      | C5-C6-H6    | 119.1      |
| C6-C7-C4    | 120.0(2)   | C6-C7-H7    | 120.0      |
| C4-C7-H7    | 120.0      | C5-C8-P2    | 114.09(14) |
| C5-C8-H8A   | 108.7      | P2-C8-H8A   | 108.7      |
| C5-C8-H8B   | 108.7      | P2-C8-H8B   | 108.7      |
| H8A-C8-H8B  | 107.6      | N1-C9-C10   | 120.35(19) |
| N1-C9-H9    | 119.8      | C10-C9-H9   | 119.8      |
| C9-C10-C12  | 120.0(2)   | C9-C10-H10  | 120.0      |
| C12-C10-H10 | 120.0      | N1-C11-C13  | 121.3(2)   |
| N1-C11-H11  | 119.3      | C13-C11-H11 | 119.3      |
| N2-C12-C13  | 125.57(19) | N2-C12-C10  | 116.48(19) |
| C13-C12-C10 | 117.87(19) | C11-C13-C12 | 119.2(2)   |
| C11-C13-H13 | 120.4      | C12-C13-H13 | 120.4      |
| N2-C14-C16  | 126.30(19) | N2-C14-C15  | 115.66(19) |
| C16-C14-C15 | 118.01(19) | C17-C15-C14 | 119.7(2)   |

|             |            |             |            |
|-------------|------------|-------------|------------|
| C17-C15-H15 | 120.2      | C14-C15-H15 | 120.2      |
| C18-C16-C14 | 119.2(2)   | C18-C16-H16 | 120.4      |
| C14-C16-H16 | 120.4      | N3-C17-C15  | 120.5(2)   |
| N3-C17-H17  | 119.8      | C15-C17-H17 | 119.8      |
| N3-C18-C16  | 121.1(2)   | N3-C18-H18  | 119.4      |
| C16-C18-H18 | 119.4      | N4-C19-C21  | 120.5(2)   |
| N4-C19-H19  | 119.8      | C21-C19-H19 | 119.8      |
| N4-C20-C22  | 120.9(2)   | N4-C20-H20  | 119.6      |
| C22-C20-H20 | 119.6      | C19-C21-C23 | 119.3(2)   |
| C19-C21-H21 | 120.4      | C23-C21-H21 | 120.4      |
| C20-C22-C23 | 118.6(2)   | C20-C22-H22 | 120.7      |
| C23-C22-H22 | 120.7      | N5-C23-C21  | 117.13(19) |
| N5-C23-C22  | 123.78(19) | C21-C23-C22 | 119.06(19) |
| N5-C24-C25  | 124.17(19) | N5-C24-C26  | 117.28(18) |
| C25-C24-C26 | 118.46(19) | C27-C25-C24 | 119.19(19) |
| C27-C25-H25 | 120.4      | C24-C25-H25 | 120.4      |
| C28-C26-C24 | 119.26(19) | C28-C26-H26 | 120.4      |
| C24-C26-H26 | 120.4      | N6-C27-C25  | 120.92(19) |
| N6-C27-H27  | 119.5      | C25-C27-H27 | 119.5      |
| N6-C28-C26  | 120.83(19) | N6-C28-H28  | 119.6      |
| C26-C28-H28 | 119.6      |             |            |

**Table S6.** Torsion angles (°) for (H<sub>2</sub>-4,4'dpa)<sub>2</sub>[Mo<sub>5</sub>O<sub>15</sub>(1,2-O<sub>3</sub>PC<sub>8</sub>H<sub>8</sub>PO<sub>3</sub>)·H<sub>2</sub>O (1·H<sub>2</sub>O).

|                 |             |                 |             |
|-----------------|-------------|-----------------|-------------|
| O13-P2-O4-Mo1   | -172.75(9)  | O19-P2-O4-Mo1   | -49.20(12)  |
| C8-P2-O4-Mo1    | 70.58(12)   | O13-P2-O4-Mo2   | -8.53(13)   |
| O19-P2-O4-Mo2   | 115.02(11)  | C8-P2-O4-Mo2    | -125.20(11) |
| O7-P1-O6-Mo5    | 156.88(8)   | O14-P1-O6-Mo5   | 34.60(11)   |
| C1-P1-O6-Mo5    | -79.82(11)  | O7-P1-O6-Mo1    | 31.89(11)   |
| O14-P1-O6-Mo1   | -90.38(10)  | C1-P1-O6-Mo1    | 155.19(9)   |
| O6-P1-O7-Mo2    | -64.83(10)  | O14-P1-O7-Mo2   | 57.47(10)   |
| C1-P1-O7-Mo2    | 172.35(9)   | O9-Mo2-O10-Mo3  | -114.87(15) |
| O8-Mo2-O10-Mo3  | 140.85(15)  | O3-Mo2-O10-Mo3  | 5.5(2)      |
| O7-Mo2-O10-Mo3  | 57.40(15)   | O4-Mo2-O10-Mo3  | -31.46(15)  |
| O19-P2-O13-Mo3  | -63.26(11)  | O4-P2-O13-Mo3   | 60.21(11)   |
| C8-P2-O13-Mo3   | 177.54(9)   | O7-P1-O14-Mo4   | 176.89(9)   |
| O6-P1-O14-Mo4   | -60.45(12)  | C1-P1-O14-Mo4   | 57.74(12)   |
| O7-P1-O14-Mo3   | -2.39(14)   | O6-P1-O14-Mo3   | 120.27(11)  |
| C1-P1-O14-Mo3   | -121.53(12) | O21-Mo5-O18-Mo4 | -169.18(9)  |
| O20-Mo5-O18-Mo4 | 84.48(10)   | O5-Mo5-O18-Mo4  | -36.93(16)  |
| O6-Mo5-O18-Mo4  | -83.59(9)   | O19-Mo5-O18-Mo4 | 1.50(8)     |
| O13-P2-O19-Mo5  | 147.75(9)   | O4-P2-O19-Mo5   | 25.71(12)   |
| C8-P2-O19-Mo5   | -93.88(11)  | O13-P2-O19-Mo4  | 28.26(11)   |
| O4-P2-O19-Mo4   | -93.78(9)   | C8-P2-O19-Mo4   | 146.63(9)   |
| O7-P1-C1-C2     | 54.06(17)   | O6-P1-C1-C2     | -69.14(16)  |

|                 |            |                |             |
|-----------------|------------|----------------|-------------|
| O14-P1-C1-C2    | 172.64(14) | P1-C1-C2-C3    | 88.3(2)     |
| P1-C1-C2-C5     | -90.3(2)   | C5-C2-C3-C4    | 2.0(3)      |
| C1-C2-C3-C4     | -176.7(2)  | C2-C3-C4-C7    | 0.7(4)      |
| C3-C2-C5-C6     | -2.8(3)    | C1-C2-C5-C6    | 175.83(19)  |
| C3-C2-C5-C8     | 177.15(19) | C1-C2-C5-C8    | -4.3(3)     |
| C2-C5-C6-C7     | 0.9(3)     | C8-C5-C6-C7    | -179.0(2)   |
| C5-C6-C7-C4     | 1.8(3)     | C3-C4-C7-C6    | -2.6(3)     |
| O13-P2-C8-C5    | -30.04(17) | O19-P2-C8-C5   | -150.99(14) |
| O4-P2-C8-C5     | 87.59(16)  | C11-N1-C9-C10  | -0.7(3)     |
| N1-C9-C10-C12   | -0.7(3)    | C9-N1-C11-C13  | 0.9(3)      |
| C14-N2-C12-C13  | -24.2(3)   | C14-N2-C12-C10 | 159.3(2)    |
| C9-C10-C12-N2   | 178.59(19) | C9-C10-C12-C13 | 1.8(3)      |
| N1-C11-C13-C12  | 0.3(3)     | N2-C12-C13-C11 | -178.0(2)   |
| C10-C12-C13-C11 | -1.6(3)    | C12-N2-C14-C16 | 0.9(4)      |
| C12-N2-C14-C15  | -177.4(2)  | N2-C14-C15-C17 | 176.4(2)    |
| C16-C14-C15-C17 | -2.1(3)    | N2-C14-C16-C18 | -176.4(2)   |
| C15-C14-C16-C18 | 1.8(3)     | C18-N3-C17-C15 | 1.0(4)      |
| C14-C15-C17-N3  | 0.7(4)     | C17-N3-C18-C16 | -1.2(3)     |
| C14-C16-C18-N3  | -0.2(3)    | C20-N4-C19-C21 | 1.1(3)      |
| C19-N4-C20-C22  | -1.6(3)    | N4-C19-C21-C23 | -0.7(3)     |
| N4-C20-C22-C23  | 1.6(3)     | C24-N5-C23-C21 | 160.6(2)    |
| C24-N5-C23-C22  | -21.6(3)   | C19-C21-C23-N5 | 178.56(19)  |

|                 |          |                |             |
|-----------------|----------|----------------|-------------|
| C19-C21-C23-C22 | 0.7(3)   | C20-C22-C23-N5 | -178.85(19) |
| C20-C22-C23-C21 | -1.1(3)  | C23-N5-C24-C25 | -20.7(3)    |
| C23-N5-C24-C26  | 162.8(2) | N5-C24-C25-C27 | -179.45(19) |
| C26-C24-C25-C27 | -3.0(3)  | N5-C24-C26-C28 | 178.63(19)  |
| C25-C24-C26-C28 | 1.9(3)   | C28-N6-C27-C25 | 0.9(3)      |
| C24-C25-C27-N6  | 1.6(3)   | C27-N6-C28-C26 | -2.0(3)     |
| C24-C26-C28-N6  | 0.6(3)   |                |             |

**Table S7.** Anisotropic atomic displacement parameters ( $\text{\AA}^2$ ) for  $(\text{H}_2\text{-4,4'dpa})_2[\text{Mo}_5\text{O}_{15}(1,2\text{-O}_3\text{PC}_8\text{H}_8\text{PO}_3)\cdot\text{H}_2\text{O} (1\cdot\text{H}_2\text{O})$ .

The anisotropic atomic displacement factor exponent takes the form:  $-2\pi^2 [ h^2 a^{*2} U_{11} + \dots + 2 h k a^* b^* U_{12} ]$

|     | $U_{11}$   | $U_{22}$   | $U_{33}$   | $U_{23}$     | $U_{13}$    | $U_{12}$     |
|-----|------------|------------|------------|--------------|-------------|--------------|
| Mo1 | 0.00964(8) | 0.01110(9) | 0.00978(8) | -0.00202(6)  | 0.00365(6)  | -0.00216(6)  |
| Mo2 | 0.00743(8) | 0.00936(8) | 0.01063(8) | -0.00080(6)  | 0.00351(6)  | 0.00032(6)   |
| Mo3 | 0.00785(8) | 0.00928(8) | 0.01038(8) | -0.00175(6)  | 0.00324(6)  | -0.00085(6)  |
| Mo4 | 0.00837(8) | 0.01080(9) | 0.01146(8) | 0.00015(6)   | 0.00369(6)  | 0.00100(6)   |
| Mo5 | 0.01236(8) | 0.00898(9) | 0.01100(8) | -0.00158(6)  | 0.00462(6)  | -0.00007(6)  |
| P1  | 0.0096(2)  | 0.0095(2)  | 0.0080(2)  | -0.00005(19) | 0.00341(18) | -0.00013(19) |
| P2  | 0.0094(2)  | 0.0103(2)  | 0.0086(2)  | 0.00027(19)  | 0.00391(18) | -0.00046(19) |
| O1  | 0.0180(8)  | 0.0151(8)  | 0.0200(8)  | -0.0039(6)   | 0.0100(6)   | -0.0054(6)   |
| O2  | 0.0142(7)  | 0.0225(8)  | 0.0133(7)  | -0.0018(6)   | 0.0011(6)   | -0.0014(6)   |
| O3  | 0.0093(7)  | 0.0139(7)  | 0.0136(7)  | -0.0021(6)   | 0.0045(5)   | -0.0014(5)   |
| O4  | 0.0099(6)  | 0.0102(7)  | 0.0104(7)  | -0.0006(5)   | 0.0042(5)   | -0.0004(5)   |
| O5  | 0.0133(7)  | 0.0129(7)  | 0.0103(7)  | -0.0031(6)   | 0.0043(5)   | -0.0004(6)   |
| O6  | 0.0120(7)  | 0.0101(7)  | 0.0103(7)  | -0.0005(5)   | 0.0045(5)   | -0.0007(5)   |
| O7  | 0.0112(7)  | 0.0115(7)  | 0.0104(7)  | -0.0003(5)   | 0.0048(5)   | 0.0001(5)    |
| O8  | 0.0113(7)  | 0.0144(7)  | 0.0152(7)  | -0.0019(6)   | 0.0055(6)   | 0.0006(6)    |
| O9  | 0.0121(7)  | 0.0145(7)  | 0.0149(7)  | 0.0006(6)    | 0.0044(6)   | 0.0028(6)    |
| O10 | 0.0096(7)  | 0.0098(7)  | 0.0133(7)  | -0.0021(5)   | 0.0038(5)   | -0.0005(5)   |
| O11 | 0.0128(7)  | 0.0177(8)  | 0.0136(7)  | -0.0037(6)   | 0.0036(6)   | -0.0010(6)   |



|     | <b>U<sub>11</sub></b> | <b>U<sub>22</sub></b> | <b>U<sub>33</sub></b> | <b>U<sub>23</sub></b> | <b>U<sub>13</sub></b> | <b>U<sub>12</sub></b> |
|-----|-----------------------|-----------------------|-----------------------|-----------------------|-----------------------|-----------------------|
| O12 | 0.0137(7)             | 0.0124(7)             | 0.0182(7)             | -0.0017(6)            | 0.0053(6)             | -0.0021(6)            |
| O13 | 0.0109(7)             | 0.0111(7)             | 0.0113(7)             | 0.0000(5)             | 0.0039(5)             | -0.0010(5)            |
| O14 | 0.0095(6)             | 0.0108(7)             | 0.0113(7)             | -0.0005(5)            | 0.0041(5)             | 0.0001(5)             |
| O15 | 0.0091(7)             | 0.0116(7)             | 0.0128(7)             | -0.0007(6)            | 0.0039(5)             | -0.0003(5)            |
| O16 | 0.0129(7)             | 0.0155(8)             | 0.0163(7)             | 0.0019(6)             | 0.0015(6)             | 0.0010(6)             |
| O17 | 0.0157(7)             | 0.0162(8)             | 0.0228(8)             | -0.0007(6)            | 0.0105(6)             | 0.0014(6)             |
| O18 | 0.0130(7)             | 0.0102(7)             | 0.0134(7)             | 0.0004(6)             | 0.0038(6)             | 0.0021(5)             |
| O19 | 0.0118(7)             | 0.0117(7)             | 0.0117(7)             | 0.0000(6)             | 0.0049(5)             | 0.0000(5)             |
| O20 | 0.0171(7)             | 0.0147(7)             | 0.0170(7)             | -0.0028(6)            | 0.0069(6)             | 0.0006(6)             |
| O21 | 0.0191(8)             | 0.0127(7)             | 0.0167(7)             | -0.0010(6)            | 0.0055(6)             | -0.0010(6)            |
| O90 | 0.0427(12)            | 0.0583(15)            | 0.0411(12)            | 0.0191(10)            | 0.0291(10)            | 0.0165(11)            |
| N1  | 0.0177(9)             | 0.0154(9)             | 0.0132(9)             | 0.0006(7)             | 0.0081(7)             | 0.0038(7)             |
| N2  | 0.0150(9)             | 0.0115(9)             | 0.0140(9)             | -0.0015(7)            | 0.0070(7)             | -0.0016(7)            |
| N3  | 0.0184(9)             | 0.0255(10)            | 0.0185(10)            | 0.0033(8)             | 0.0112(8)             | -0.0016(8)            |
| N4  | 0.0165(9)             | 0.0246(10)            | 0.0126(9)             | 0.0050(8)             | 0.0050(7)             | 0.0003(8)             |
| N5  | 0.0140(9)             | 0.0126(9)             | 0.0143(9)             | 0.0020(7)             | 0.0051(7)             | 0.0046(7)             |
| N6  | 0.0178(9)             | 0.0148(9)             | 0.0108(8)             | 0.0030(7)             | 0.0040(7)             | 0.0002(7)             |
| C1  | 0.0134(10)            | 0.0155(10)            | 0.0093(9)             | 0.0010(8)             | 0.0036(8)             | 0.0035(8)             |
| C2  | 0.0142(10)            | 0.0161(11)            | 0.0082(9)             | 0.0031(8)             | 0.0008(8)             | 0.0024(8)             |
| C3  | 0.0294(12)            | 0.0180(11)            | 0.0141(10)            | -0.0019(9)            | 0.0058(9)             | 0.0007(9)             |
| C4  | 0.0359(14)            | 0.0174(12)            | 0.0173(11)            | -0.0012(9)            | 0.0014(10)            | -0.0081(10)           |

|     | <b>U<sub>11</sub></b> | <b>U<sub>22</sub></b> | <b>U<sub>33</sub></b> | <b>U<sub>23</sub></b> | <b>U<sub>13</sub></b> | <b>U<sub>12</sub></b> |
|-----|-----------------------|-----------------------|-----------------------|-----------------------|-----------------------|-----------------------|
| C5  | 0.0127(10)            | 0.0144(10)            | 0.0084(9)             | 0.0009(8)             | 0.0003(7)             | 0.0006(8)             |
| C6  | 0.0159(10)            | 0.0236(12)            | 0.0105(10)            | 0.0027(9)             | 0.0024(8)             | 0.0003(9)             |
| C7  | 0.0215(11)            | 0.0248(12)            | 0.0149(11)            | 0.0045(9)             | 0.0003(9)             | -0.0092(10)           |
| C8  | 0.0194(10)            | 0.0149(10)            | 0.0094(9)             | -0.0003(8)            | 0.0058(8)             | -0.0009(8)            |
| C9  | 0.0146(10)            | 0.0129(10)            | 0.0174(10)            | 0.0037(8)             | 0.0068(8)             | 0.0019(8)             |
| C10 | 0.0148(10)            | 0.0118(10)            | 0.0138(10)            | 0.0011(8)             | 0.0047(8)             | 0.0002(8)             |
| C11 | 0.0175(10)            | 0.0157(11)            | 0.0142(10)            | -0.0006(8)            | 0.0024(8)             | 0.0007(8)             |
| C12 | 0.0133(10)            | 0.0115(10)            | 0.0122(10)            | 0.0040(8)             | 0.0040(8)             | 0.0043(8)             |
| C13 | 0.0128(10)            | 0.0148(10)            | 0.0147(10)            | 0.0015(8)             | 0.0036(8)             | 0.0000(8)             |
| C14 | 0.0102(9)             | 0.0157(10)            | 0.0135(10)            | 0.0037(8)             | 0.0040(8)             | 0.0029(8)             |
| C15 | 0.0205(11)            | 0.0182(11)            | 0.0188(11)            | -0.0026(9)            | 0.0087(9)             | -0.0030(9)            |
| C16 | 0.0148(10)            | 0.0150(10)            | 0.0161(10)            | 0.0002(8)             | 0.0060(8)             | 0.0024(8)             |
| C17 | 0.0246(12)            | 0.0268(13)            | 0.0190(11)            | -0.0039(10)           | 0.0121(9)             | -0.0034(10)           |
| C18 | 0.0132(10)            | 0.0161(11)            | 0.0216(11)            | 0.0037(9)             | 0.0045(8)             | 0.0008(8)             |
| C19 | 0.0147(10)            | 0.0172(11)            | 0.0182(11)            | 0.0068(9)             | 0.0011(8)             | 0.0001(8)             |
| C20 | 0.0157(10)            | 0.0196(11)            | 0.0129(10)            | -0.0003(8)            | 0.0026(8)             | 0.0019(9)             |
| C21 | 0.0137(10)            | 0.0133(10)            | 0.0174(10)            | 0.0016(8)             | 0.0017(8)             | 0.0012(8)             |
| C22 | 0.0132(10)            | 0.0121(10)            | 0.0126(10)            | 0.0010(8)             | 0.0012(8)             | -0.0004(8)            |
| C23 | 0.0087(9)             | 0.0153(10)            | 0.0113(10)            | 0.0014(8)             | 0.0000(7)             | -0.0020(8)            |
| C24 | 0.0142(10)            | 0.0100(10)            | 0.0094(9)             | -0.0028(8)            | 0.0012(8)             | -0.0019(8)            |
| C25 | 0.0116(9)             | 0.0138(10)            | 0.0095(9)             | -0.0023(8)            | 0.0031(7)             | -0.0017(8)            |

|     | <b>U<sub>11</sub></b> | <b>U<sub>22</sub></b> | <b>U<sub>33</sub></b> | <b>U<sub>23</sub></b> | <b>U<sub>13</sub></b> | <b>U<sub>12</sub></b> |
|-----|-----------------------|-----------------------|-----------------------|-----------------------|-----------------------|-----------------------|
| C26 | 0.0117(10)            | 0.0149(10)            | 0.0154(10)            | -0.0016(8)            | 0.0039(8)             | 0.0021(8)             |
| C27 | 0.0132(10)            | 0.0141(10)            | 0.0130(10)            | -0.0013(8)            | 0.0033(8)             | 0.0014(8)             |
| C28 | 0.0165(10)            | 0.0170(11)            | 0.0145(10)            | -0.0018(8)            | 0.0075(8)             | -0.0021(8)            |

**Table S8.** Hydrogen atomic coordinates and isotropic atomic displacement parameters ( $\text{\AA}^2$ ) for  $(\text{H}_2\text{-4,4'dpa})_2[\text{Mo}_5\text{O}_{15}(1,2\text{-O}_3\text{PC}_8\text{H}_8\text{PO}_3)\cdot\text{H}_2\text{O} (1\cdot\text{H}_2\text{O})$ .

|      | <b>x/a</b> | <b>y/b</b> | <b>z/c</b> | <b>U(eq)</b> |
|------|------------|------------|------------|--------------|
| H90A | 0.069(2)   | 0.8638(18) | 0.784(2)   | 0.053        |
| H90B | 0.174(3)   | 0.8801(15) | 0.8103(18) | 0.053        |
| H1A  | 0.9702     | 0.6291     | 0.5902     | 0.015        |
| H1B  | 0.9581     | 0.6953     | 0.6393     | 0.015        |
| H3   | 0.8369     | 0.5353     | 0.5784     | 0.025        |
| H4   | 0.7026     | 0.4702     | 0.6249     | 0.03         |
| H6   | 0.6597     | 0.6301     | 0.7560     | 0.02         |
| H7   | 0.6083     | 0.5197     | 0.7109     | 0.026        |
| H8A  | 0.8768     | 0.7591     | 0.2077     | 0.017        |
| H8B  | 0.7383     | 0.7468     | 0.2050     | 0.017        |
| H9   | 0.0380     | 0.5871     | 0.7965     | 0.017        |
| H10  | 0.1101     | 0.5503     | 0.6964     | 0.016        |
| H11  | 0.3154     | 0.7144     | 0.8656     | 0.019        |
| H13  | 0.3943     | 0.6815     | 0.7669     | 0.017        |
| H15  | 0.3502     | 0.5308     | 0.5486     | 0.022        |
| H16  | 0.4275     | 0.7054     | 0.6747     | 0.018        |
| H17  | 0.4650     | 0.5724     | 0.4716     | 0.027        |
| H18  | 0.5413     | 0.7420     | 0.5946     | 0.02         |
| H19  | 0.2919     | 0.8033     | 0.6734     | 0.021        |

|     | <b>x/a</b> | <b>y/b</b> | <b>z/c</b> | <b>U(eq)</b> |
|-----|------------|------------|------------|--------------|
| H20 | 0.1816     | 0.9963     | 0.6696     | 0.02         |
| H21 | 0.3616     | 0.8215     | 0.5673     | 0.018        |
| H22 | 0.2508     | 1.0203     | 0.5641     | 0.016        |
| H25 | 0.1661     | 1.0139     | 0.4479     | 0.014        |
| H26 | 0.4819     | 0.9630     | 0.4000     | 0.017        |
| H27 | 0.1348     | 1.0959     | 0.3531     | 0.016        |
| H28 | 0.4392     | 1.0439     | 0.3040     | 0.018        |
| H2' | 0.255(2)   | 0.5535(11) | 0.6377(14) | 0.018(6)     |
| H6' | 0.269(2)   | 1.1029(12) | 0.2824(12) | 0.023(7)     |
| H1' | 0.145(2)   | 0.6685(14) | 0.8754(13) | 0.028(7)     |
| H5' | 0.418(2)   | 0.9059(13) | 0.4913(16) | 0.027(7)     |
| H4' | 0.206(2)   | 0.8900(15) | 0.7176(13) | 0.031(8)     |
| H3' | 0.544(2)   | 0.6784(14) | 0.4952(14) | 0.026(7)     |

**Table S9.** Sample and crystal data for  $(\text{H}_24,4'\text{-dpa})_2[\text{Mo}_5\text{O}_{15}(1,3\text{-O}_3\text{PC}_8\text{H}_8\text{PO}_3)]$  (**2**).

|                        |                                                                                                           |                      |
|------------------------|-----------------------------------------------------------------------------------------------------------|----------------------|
| Identification code    | $(\text{H}_24,4'\text{-dpa})_2[\text{Mo}_5\text{O}_{15}(1,3\text{-O}_3\text{PC}_8\text{H}_8\text{PO}_3)]$ |                      |
| Chemical formula       | $\text{C}_{28}\text{H}_{30}\text{Mo}_5\text{N}_6\text{O}_{21}\text{P}_2$                                  |                      |
| Formula weight         | 1328.22                                                                                                   |                      |
| Temperature            | 90(2) K                                                                                                   |                      |
| Wavelength             | 0.71073 Å                                                                                                 |                      |
| Crystal size           | 0.080 x 0.154 x 0.265 mm                                                                                  |                      |
| Crystal system         | Trigonal                                                                                                  |                      |
| Space group            | P 32                                                                                                      |                      |
| Unit cell dimensions   | $a = 11.1778(7)$ Å                                                                                        | $\alpha = 90^\circ$  |
|                        | $b = 11.1778(7)$ Å                                                                                        | $\beta = 90^\circ$   |
|                        | $c = 27.6410(17)$ Å                                                                                       | $\gamma = 120^\circ$ |
| Volume                 | $2990.9(4)$ Å <sup>3</sup>                                                                                |                      |
| Z                      | 3                                                                                                         |                      |
| Density (calculated)   | $2.212$ g/cm <sup>3</sup>                                                                                 |                      |
| Absorption coefficient | $1.701$ mm <sup>-1</sup>                                                                                  |                      |
| F(000)                 | 1944                                                                                                      |                      |

**Table S10.** Data collection and structure refinement for (H<sub>2</sub>4,4'-dpa)<sub>2</sub>  
[Mo<sub>5</sub>O<sub>15</sub>(1,3-O<sub>3</sub>PC<sub>8</sub>H<sub>8</sub>PO<sub>3</sub>)] (**2**).

|                                     |                                                                            |                           |
|-------------------------------------|----------------------------------------------------------------------------|---------------------------|
| Theta range for data collection     | 2.10 to 27.09°                                                             |                           |
| Index ranges                        | -14<=h<=13, -13<=k<=14, -35<=l<=35                                         |                           |
| Reflections collected               | 32751                                                                      |                           |
| Independent reflections             | 8572 [R(int) = 0.0209]                                                     |                           |
| Coverage of independent reflections | 100.0%                                                                     |                           |
| Max. and min. transmission          | 0.8760 and 0.6610                                                          |                           |
| Refinement method                   | Full-matrix least-squares on F <sup>2</sup>                                |                           |
| Refinement program                  | SHELXL-2013 (Sheldrick, 2013)                                              |                           |
| Function minimized                  | $\Sigma w(F_o^2 - F_c^2)^2$                                                |                           |
| Data / restraints / parameters      | 8572 / 1 / 560                                                             |                           |
| Goodness-of-fit on F <sup>2</sup>   | 1.049                                                                      |                           |
| $\Delta/\sigma_{\max}$              | 0.001                                                                      |                           |
| Final R indices                     | 8346 data; I>2σ(I)                                                         | R1 = 0.0338, wR2 = 0.0902 |
|                                     | all data                                                                   | R1 = 0.0350, wR2 = 0.0908 |
| Weighting scheme                    | $w=1/[\sigma^2(F_o^2)+(0.0509P)^2+12.8222P]$<br>where $P=(F_o^2+2F_c^2)/3$ |                           |
| Absolute structure parameter        | 0.0(0)                                                                     |                           |
| Largest diff. peak and hole         | 1.133 and -0.560 eÅ <sup>-3</sup>                                          |                           |
| R.M.S. deviation from mean          | 0.143 eÅ <sup>-3</sup>                                                     |                           |



**Table S11.** Atomic coordinates and equivalent isotropic atomic displacement parameters ( $\text{\AA}^2$ ) for  $(\text{H}_2\text{4,4}'\text{-dpa})_2[\text{Mo}_5\text{O}_{15}(1,3\text{-O}_3\text{PC}_8\text{H}_8\text{PO}_3)]$  (**2**).

$U(\text{eq})$  is defined as one third of the trace of the orthogonalized  $U_{ij}$  tensor.

|     | <b>x/a</b> | <b>y/b</b> | <b>z/c</b> | <b>U(eq)</b> |
|-----|------------|------------|------------|--------------|
| Mo1 | 0.15857(7) | 0.71566(7) | 0.31185(3) | 0.01639(15)  |
| Mo2 | 0.94565(8) | 0.81303(7) | 0.36164(3) | 0.01747(16)  |
| Mo3 | 0.67841(7) | 0.53954(8) | 0.41701(3) | 0.01796(16)  |
| Mo4 | 0.06339(7) | 0.39100(7) | 0.35212(3) | 0.01630(15)  |
| Mo5 | 0.70357(7) | 0.25655(7) | 0.39677(2) | 0.01626(15)  |
| P1  | 0.8103(2)  | 0.4909(2)  | 0.30721(7) | 0.0146(4)    |
| P2  | 0.0028(2)  | 0.5839(2)  | 0.42716(7) | 0.0132(4)    |
| O1  | 0.3067(7)  | 0.8529(7)  | 0.3339(2)  | 0.0273(15)   |
| O2  | 0.1982(7)  | 0.7119(7)  | 0.2516(2)  | 0.0262(14)   |
| O3  | 0.9598(6)  | 0.5185(6)  | 0.3086(2)  | 0.0162(12)   |
| O4  | 0.1967(6)  | 0.5754(6)  | 0.3373(2)  | 0.0167(11)   |
| O5  | 0.0399(7)  | 0.3137(7)  | 0.2967(2)  | 0.0218(13)   |
| O6  | 0.1558(7)  | 0.3306(7)  | 0.3818(2)  | 0.0220(13)   |
| O7  | 0.8809(6)  | 0.2773(6)  | 0.3777(2)  | 0.0174(12)   |
| O8  | 0.0770(6)  | 0.5019(6)  | 0.4239(2)  | 0.0156(11)   |
| O9  | 0.7012(7)  | 0.2063(7)  | 0.4553(2)  | 0.0236(13)   |
| O10 | 0.5943(6)  | 0.3470(7)  | 0.4013(2)  | 0.0213(13)   |
| O11 | 0.7122(6)  | 0.3391(6)  | 0.3187(2)  | 0.0184(12)   |

|     | <b>x/a</b> | <b>y/b</b> | <b>z/c</b> | <b>U(eq)</b> |
|-----|------------|------------|------------|--------------|
| O12 | 0.8451(6)  | 0.4852(6)  | 0.4219(2)  | 0.0149(11)   |
| O13 | 0.5506(7)  | 0.5660(8)  | 0.3945(3)  | 0.0277(15)   |
| O14 | 0.0561(6)  | 0.6982(6)  | 0.3885(2)  | 0.0155(11)   |
| O15 | 0.5899(7)  | 0.1041(7)  | 0.3696(2)  | 0.0256(14)   |
| O16 | 0.8530(7)  | 0.8724(7)  | 0.3297(2)  | 0.0258(14)   |
| O17 | 0.6559(7)  | 0.5327(7)  | 0.4779(2)  | 0.0295(15)   |
| O18 | 0.7903(6)  | 0.5861(6)  | 0.3427(2)  | 0.0138(11)   |
| O19 | 0.8328(6)  | 0.7290(6)  | 0.4166(2)  | 0.0185(12)   |
| O20 | 0.0728(7)  | 0.9592(7)  | 0.3880(2)  | 0.0250(14)   |
| O21 | 0.0409(7)  | 0.7919(6)  | 0.3064(2)  | 0.0192(12)   |
| N1  | 0.8333(11) | 0.7765(9)  | 0.1264(3)  | 0.039(2)     |
| N2  | 0.0388(8)  | 0.0141(8)  | 0.2461(3)  | 0.0221(16)   |
| N3  | 0.4392(8)  | 0.2125(8)  | 0.2963(3)  | 0.0219(16)   |
| N4  | 0.3991(9)  | 0.9184(9)  | 0.4390(3)  | 0.0320(19)   |
| N5  | 0.3503(10) | 0.1309(10) | 0.5521(3)  | 0.034(2)     |
| N6  | 0.3886(11) | 0.5122(11) | 0.5707(4)  | 0.045(3)     |
| C1  | 0.7740(9)  | 0.5304(9)  | 0.2476(3)  | 0.0168(16)   |
| C2  | 0.0306(9)  | 0.6687(8)  | 0.4853(3)  | 0.0150(15)   |
| C3  | 0.0164(8)  | 0.5813(8)  | 0.5285(3)  | 0.0139(15)   |
| C4  | 0.8955(9)  | 0.4524(9)  | 0.5362(3)  | 0.0164(16)   |
| C5  | 0.8863(8)  | 0.3694(9)  | 0.5756(3)  | 0.0172(16)   |

|     | <b>x/a</b> | <b>y/b</b> | <b>z/c</b> | <b>U(eq)</b> |
|-----|------------|------------|------------|--------------|
| C6  | 0.9979(9)  | 0.4175(9)  | 0.6077(3)  | 0.0198(17)   |
| C7  | 0.1128(9)  | 0.5454(9)  | 0.6014(3)  | 0.0207(17)   |
| C8  | 0.1243(9)  | 0.6282(9)  | 0.5622(3)  | 0.0186(17)   |
| C9  | 0.9712(13) | 0.8579(12) | 0.1230(4)  | 0.037(3)     |
| C10 | 0.7645(12) | 0.7763(10) | 0.1656(4)  | 0.034(2)     |
| C11 | 0.0438(12) | 0.9424(11) | 0.1613(4)  | 0.035(2)     |
| C12 | 0.9781(10) | 0.9392(9)  | 0.2045(3)  | 0.0238(19)   |
| C13 | 0.8322(11) | 0.8525(10) | 0.2066(4)  | 0.029(2)     |
| C14 | 0.1759(9)  | 0.0794(8)  | 0.2610(3)  | 0.0180(16)   |
| C15 | 0.2811(11) | 0.0671(10) | 0.2379(3)  | 0.0258(19)   |
| C16 | 0.2073(9)  | 0.1579(9)  | 0.3026(3)  | 0.0196(17)   |
| C17 | 0.4107(10) | 0.1381(10) | 0.2565(4)  | 0.027(2)     |
| C18 | 0.3429(9)  | 0.2259(9)  | 0.3205(3)  | 0.0206(17)   |
| C19 | 0.3388(10) | 0.9954(10) | 0.4300(4)  | 0.028(2)     |
| C20 | 0.4364(11) | 0.9066(11) | 0.4834(4)  | 0.031(2)     |
| C21 | 0.3194(10) | 0.0669(10) | 0.4656(4)  | 0.030(2)     |
| C22 | 0.4231(11) | 0.9787(11) | 0.5210(4)  | 0.030(2)     |
| C23 | 0.3644(11) | 0.0617(10) | 0.5125(4)  | 0.028(2)     |
| C24 | 0.3573(10) | 0.2558(11) | 0.5552(4)  | 0.031(2)     |
| C25 | 0.3817(12) | 0.3449(12) | 0.5168(5)  | 0.038(3)     |
| C26 | 0.3463(13) | 0.2984(14) | 0.6027(5)  | 0.043(3)     |

|     | <b>x/a</b> | <b>y/b</b> | <b>z/c</b> | <b>U(eq)</b> |
|-----|------------|------------|------------|--------------|
| C27 | 0.3966(12) | 0.4746(12) | 0.5252(5)  | 0.044(3)     |
| C28 | 0.3634(12) | 0.4262(14) | 0.6094(5)  | 0.045(3)     |

**Table S12.** Bond lengths (Å) for (H<sub>2</sub>4,4'-dpa)<sub>2</sub>[Mo<sub>5</sub>O<sub>15</sub>(1,3-O<sub>3</sub>PC<sub>8</sub>H<sub>8</sub>PO<sub>3</sub>)] (**2**).

|         |           |         |           |
|---------|-----------|---------|-----------|
| Mo1-O1  | 1.711(7)  | Mo1-O2  | 1.728(6)  |
| Mo1-O21 | 1.898(6)  | Mo1-O4  | 1.950(6)  |
| Mo1-O3  | 2.214(6)  | Mo1-O14 | 2.370(6)  |
| Mo2-O20 | 1.702(7)  | Mo2-O16 | 1.726(7)  |
| Mo2-O19 | 1.897(6)  | Mo2-O21 | 1.941(6)  |
| Mo2-O14 | 2.304(6)  | Mo2-O18 | 2.306(6)  |
| Mo3-O17 | 1.698(7)  | Mo3-O13 | 1.714(6)  |
| Mo3-O10 | 1.919(6)  | Mo3-O19 | 1.952(6)  |
| Mo3-O12 | 2.234(6)  | Mo3-O18 | 2.326(6)  |
| Mo4-O6  | 1.700(6)  | Mo4-O5  | 1.714(6)  |
| Mo4-O4  | 1.888(6)  | Mo4-O7  | 1.919(6)  |
| Mo4-O8  | 2.304(6)  | Mo5-O15 | 1.708(6)  |
| Mo5-O9  | 1.710(7)  | Mo5-O10 | 1.940(6)  |
| Mo5-O7  | 1.950(6)  | Mo5-O11 | 2.330(6)  |
| Mo5-O12 | 2.339(6)  | P1-O11  | 1.524(6)  |
| P1-O3   | 1.541(6)  | P1-O18  | 1.543(6)  |
| P1-C1   | 1.803(8)  | P2-O8   | 1.516(6)  |
| P2-O14  | 1.539(6)  | P2-O12  | 1.550(6)  |
| P2-C2   | 1.811(8)  | N1-C10  | 1.328(16) |
| N1-C9   | 1.345(16) | N1-H1'  | 0.88      |
| N2-C12  | 1.382(12) | N2-C14  | 1.391(11) |

|         |           |         |           |
|---------|-----------|---------|-----------|
| N2-H2'  | 0.88      | N3-C17  | 1.319(13) |
| N3-C18  | 1.337(12) | N3-H3'  | 0.88      |
| N4-C20  | 1.323(14) | N4-C19  | 1.357(14) |
| N4-H4'  | 0.88      | N5-C24  | 1.362(14) |
| N5-C23  | 1.394(13) | N5-H5'  | 0.88      |
| N6-C27  | 1.343(18) | N6-C28  | 1.370(19) |
| N6-H6'  | 0.88      | C1-C5   | 1.540(11) |
| C1-H1A  | 0.99      | C1-H1B  | 0.99      |
| C2-C3   | 1.501(11) | C2-H2A  | 0.99      |
| C2-H2B  | 0.99      | C3-C8   | 1.402(12) |
| C3-C4   | 1.415(12) | C4-C5   | 1.399(12) |
| C4-H4   | 0.95      | C5-C6   | 1.401(12) |
| C5-C1   | 1.540(11) | C6-C7   | 1.374(12) |
| C6-H6   | 0.95      | C7-C8   | 1.390(12) |
| C7-H7   | 0.95      | C8-H8   | 0.95      |
| C9-C11  | 1.380(15) | C9-H9   | 0.95      |
| C10-C13 | 1.393(14) | C10-H10 | 0.95      |
| C11-C12 | 1.394(15) | C11-H11 | 0.95      |
| C12-C13 | 1.422(14) | C13-H13 | 0.95      |
| C14-C16 | 1.380(12) | C14-C15 | 1.405(13) |
| C15-C17 | 1.357(14) | C15-H15 | 0.95      |
| C16-C18 | 1.403(12) | C16-H16 | 0.95      |

|         |           |         |           |
|---------|-----------|---------|-----------|
| C17-H17 | 0.95      | C18-H18 | 0.95      |
| C19-C21 | 1.351(15) | C19-H19 | 0.95      |
| C20-C22 | 1.369(15) | C20-H20 | 0.95      |
| C21-C23 | 1.403(15) | C21-H21 | 0.95      |
| C22-C23 | 1.398(15) | C22-H22 | 0.95      |
| C24-C25 | 1.388(16) | C24-C26 | 1.421(16) |
| C25-C27 | 1.394(17) | C25-H25 | 0.95      |
| C26-C28 | 1.356(19) | C26-H26 | 0.95      |
| C27-H27 | 0.95      | C28-H28 | 0.95      |



**Table S13.** Bond angles (°) for (H<sub>2</sub>4,4'-dpa)<sub>2</sub>[Mo<sub>5</sub>O<sub>15</sub>(1,3-O<sub>3</sub>PC<sub>8</sub>H<sub>8</sub>PO<sub>3</sub>)] (**2**).

|             |          |             |          |
|-------------|----------|-------------|----------|
| O1-Mo1-O2   | 102.7(3) | O1-Mo1-O21  | 101.7(3) |
| O2-Mo1-O21  | 100.3(3) | O1-Mo1-O4   | 95.2(3)  |
| O2-Mo1-O4   | 99.6(3)  | O21-Mo1-O4  | 150.3(2) |
| O1-Mo1-O3   | 161.2(3) | O2-Mo1-O3   | 94.5(3)  |
| O21-Mo1-O3  | 82.4(2)  | O4-Mo1-O3   | 74.2(2)  |
| O1-Mo1-O14  | 88.1(3)  | O2-Mo1-O14  | 168.0(3) |
| O21-Mo1-O14 | 72.1(2)  | O4-Mo1-O14  | 84.4(2)  |
| O3-Mo1-O14  | 75.6(2)  | O20-Mo2-O16 | 102.9(3) |
| O20-Mo2-O19 | 99.3(3)  | O16-Mo2-O19 | 102.8(3) |
| O20-Mo2-O21 | 102.0(3) | O16-Mo2-O21 | 96.7(3)  |
| O19-Mo2-O21 | 147.0(2) | O20-Mo2-O14 | 88.5(3)  |
| O16-Mo2-O14 | 166.1(3) | O19-Mo2-O14 | 82.8(2)  |
| O21-Mo2-O14 | 72.9(2)  | O20-Mo2-O18 | 164.0(3) |
| O16-Mo2-O18 | 92.3(3)  | O19-Mo2-O18 | 71.9(2)  |
| O21-Mo2-O18 | 81.1(2)  | O14-Mo2-O18 | 77.3(2)  |
| O17-Mo3-O13 | 104.5(3) | O17-Mo3-O10 | 101.3(3) |
| O13-Mo3-O10 | 97.3(3)  | O17-Mo3-O19 | 94.8(3)  |
| O13-Mo3-O19 | 99.9(3)  | O10-Mo3-O19 | 152.5(3) |
| O17-Mo3-O12 | 93.0(3)  | O13-Mo3-O12 | 161.6(3) |
| O10-Mo3-O12 | 73.5(2)  | O19-Mo3-O12 | 83.7(2)  |
| O17-Mo3-O18 | 159.6(3) | O13-Mo3-O18 | 92.4(3)  |

|             |          |             |          |
|-------------|----------|-------------|----------|
| O10-Mo3-O18 | 87.6(2)  | O19-Mo3-O18 | 70.6(2)  |
| O12-Mo3-O18 | 71.7(2)  | O6-Mo4-O5   | 101.6(3) |
| O6-Mo4-O4   | 103.5(3) | O5-Mo4-O4   | 101.2(3) |
| O6-Mo4-O7   | 102.4(3) | O5-Mo4-O7   | 98.7(3)  |
| O4-Mo4-O7   | 143.1(3) | O6-Mo4-O8   | 84.7(3)  |
| O5-Mo4-O8   | 173.5(3) | O4-Mo4-O8   | 78.2(2)  |
| O7-Mo4-O8   | 78.6(2)  | O15-Mo5-O9  | 102.0(3) |
| O15-Mo5-O10 | 101.5(3) | O9-Mo5-O10  | 101.6(3) |
| O15-Mo5-O7  | 101.8(3) | O9-Mo5-O7   | 98.3(3)  |
| O10-Mo5-O7  | 145.3(3) | O15-Mo5-O11 | 81.4(3)  |
| O9-Mo5-O11  | 176.4(3) | O10-Mo5-O11 | 76.4(2)  |
| O7-Mo5-O11  | 82.2(2)  | O15-Mo5-O12 | 168.4(3) |
| O9-Mo5-O12  | 88.2(3)  | O10-Mo5-O12 | 70.7(2)  |
| O7-Mo5-O12  | 81.9(2)  | O11-Mo5-O12 | 88.3(2)  |
| O11-P1-O3   | 108.8(3) | O11-P1-O18  | 111.4(3) |
| O3-P1-O18   | 111.3(3) | O11-P1-C1   | 109.8(4) |
| O3-P1-C1    | 109.1(4) | O18-P1-C1   | 106.5(4) |
| O8-P2-O14   | 111.1(3) | O8-P2-O12   | 109.6(3) |
| O14-P2-O12  | 110.9(3) | O8-P2-C2    | 111.5(4) |
| O14-P2-C2   | 106.7(4) | O12-P2-C2   | 107.0(4) |
| P1-O3-Mo1   | 130.4(3) | Mo4-O4-Mo1  | 125.9(3) |
| Mo4-O7-Mo5  | 149.2(3) | P2-O8-Mo4   | 117.8(3) |

|             |           |             |          |
|-------------|-----------|-------------|----------|
| Mo3-O10-Mo5 | 121.1(3)  | P1-O11-Mo5  | 119.9(3) |
| P2-O12-Mo3  | 128.2(3)  | P2-O12-Mo5  | 135.5(3) |
| Mo3-O12-Mo5 | 94.5(2)   | P2-O14-Mo2  | 126.4(3) |
| P2-O14-Mo1  | 131.3(3)  | Mo2-O14-Mo1 | 92.1(2)  |
| P1-O18-Mo2  | 127.9(3)  | P1-O18-Mo3  | 130.8(3) |
| Mo2-O18-Mo3 | 94.0(2)   | Mo2-O19-Mo3 | 123.3(3) |
| Mo1-O21-Mo2 | 122.6(3)  | C10-N1-C9   | 121.7(9) |
| C10-N1-H1'  | 119.1     | C9-N1-H1'   | 119.1    |
| C12-N2-C14  | 130.0(9)  | C12-N2-H2'  | 115.0    |
| C14-N2-H2'  | 115.0     | C17-N3-C18  | 122.2(8) |
| C17-N3-H3'  | 118.9     | C18-N3-H3'  | 118.9    |
| C20-N4-C19  | 121.0(9)  | C20-N4-H4'  | 119.5    |
| C19-N4-H4'  | 119.5     | C24-N5-C23  | 131.0(9) |
| C24-N5-H5'  | 114.5     | C23-N5-H5'  | 114.5    |
| C27-N6-C28  | 122.2(11) | C27-N6-H6'  | 118.9    |
| C28-N6-H6'  | 118.9     | C5-C1-P1    | 114.5(6) |
| C5-C1-H1A   | 108.6     | P1-C1-H1A   | 108.6    |
| C5-C1-H1B   | 108.6     | P1-C1-H1B   | 108.6    |
| H1A-C1-H1B  | 107.6     | C3-C2-P2    | 115.5(6) |
| C3-C2-H2A   | 108.4     | P2-C2-H2A   | 108.4    |
| C3-C2-H2B   | 108.4     | P2-C2-H2B   | 108.4    |
| H2A-C2-H2B  | 107.5     | C8-C3-C4    | 119.0(7) |

|             |           |             |           |
|-------------|-----------|-------------|-----------|
| C8-C3-C2    | 119.7(7)  | C4-C3-C2    | 121.3(7)  |
| C5-C4-C3    | 120.6(7)  | C5-C4-H4    | 119.7     |
| C3-C4-H4    | 119.7     | C4-C5-C6    | 118.8(8)  |
| C4-C5-C1    | 118.9(8)  | C6-C5-C1    | 122.2(8)  |
| C7-C6-C5    | 120.6(8)  | C7-C6-H6    | 119.7     |
| C5-C6-H6    | 119.7     | C6-C7-C8    | 121.2(8)  |
| C6-C7-H7    | 119.4     | C8-C7-H7    | 119.4     |
| C7-C8-C3    | 119.6(8)  | C7-C8-H8    | 120.2     |
| C3-C8-H8    | 120.2     | N1-C9-C11   | 119.5(11) |
| N1-C9-H9    | 120.3     | C11-C9-H9   | 120.3     |
| N1-C10-C13  | 121.7(11) | N1-C10-H10  | 119.2     |
| C13-C10-H10 | 119.2     | C9-C11-C12  | 121.2(10) |
| C9-C11-H11  | 119.4     | C12-C11-H11 | 119.4     |
| N2-C12-C11  | 127.2(9)  | N2-C12-C13  | 115.3(9)  |
| C11-C12-C13 | 117.5(9)  | C10-C13-C12 | 118.1(11) |
| C10-C13-H13 | 120.9     | C12-C13-H13 | 120.9     |
| C16-C14-N2  | 116.4(8)  | C16-C14-C15 | 118.8(8)  |
| N2-C14-C15  | 124.7(8)  | C17-C15-C14 | 118.1(8)  |
| C17-C15-H15 | 120.9     | C14-C15-H15 | 120.9     |
| C14-C16-C18 | 120.0(9)  | C14-C16-H16 | 120.0     |
| C18-C16-H16 | 120.0     | N3-C17-C15  | 122.4(9)  |
| N3-C17-H17  | 118.8     | C15-C17-H17 | 118.8     |

|             |           |             |           |
|-------------|-----------|-------------|-----------|
| N3-C18-C16  | 118.4(8)  | N3-C18-H18  | 120.8     |
| C16-C18-H18 | 120.8     | C21-C19-N4  | 121.2(9)  |
| C21-C19-H19 | 119.4     | N4-C19-H19  | 119.4     |
| N4-C20-C22  | 120.9(10) | N4-C20-H20  | 119.6     |
| C22-C20-H20 | 119.6     | C19-C21-C23 | 118.8(10) |
| C19-C21-H21 | 120.6     | C23-C21-H21 | 120.6     |
| C20-C22-C23 | 119.2(10) | C20-C22-H22 | 120.4     |
| C23-C22-H22 | 120.4     | N5-C23-C22  | 117.2(9)  |
| N5-C23-C21  | 124.1(10) | C22-C23-C21 | 118.7(9)  |
| N5-C24-C25  | 125.2(10) | N5-C24-C26  | 115.6(11) |
| C25-C24-C26 | 119.0(11) | C24-C25-C27 | 119.8(12) |
| C24-C25-H25 | 120.1     | C27-C25-H25 | 120.1     |
| C28-C26-C24 | 119.3(13) | C28-C26-H26 | 120.3     |
| C24-C26-H26 | 120.3     | N6-C27-C25  | 119.4(13) |
| N6-C27-H27  | 120.3     | C25-C27-H27 | 120.3     |
| C26-C28-N6  | 120.3(12) | C26-C28-H28 | 119.9     |
| N6-C28-H28  | 119.9     |             |           |

**Table S14.** Torsion angles (°) for (H<sub>2</sub>4,4'-dpa)<sub>2</sub>[Mo<sub>5</sub>O<sub>15</sub>(1,3-O<sub>3</sub>PC<sub>8</sub>H<sub>8</sub>PO<sub>3</sub>)] (2).

|                 |           |                 |           |
|-----------------|-----------|-----------------|-----------|
| O11-P1-O3-Mo1   | -164.9(4) | O18-P1-O3-Mo1   | -41.8(5)  |
| C1-P1-O3-Mo1    | 75.4(5)   | O6-Mo4-O4-Mo1   | -170.2(4) |
| O5-Mo4-O4-Mo1   | 84.8(4)   | O7-Mo4-O4-Mo1   | -36.6(6)  |
| O8-Mo4-O4-Mo1   | -88.6(4)  | O14-P2-O8-Mo4   | -59.0(4)  |
| O12-P2-O8-Mo4   | 63.9(4)   | C2-P2-O8-Mo4    | -177.8(3) |
| O3-P1-O11-Mo5   | 70.2(4)   | O18-P1-O11-Mo5  | -52.8(5)  |
| C1-P1-O11-Mo5   | -170.5(4) | O8-P2-O12-Mo3   | -174.3(4) |
| O14-P2-O12-Mo3  | -51.3(5)  | C2-P2-O12-Mo3   | 64.7(5)   |
| O8-P2-O12-Mo5   | -13.7(6)  | O14-P2-O12-Mo5  | 109.3(5)  |
| C2-P2-O12-Mo5   | -134.7(5) | O8-P2-O14-Mo2   | 161.6(4)  |
| O12-P2-O14-Mo2  | 39.4(5)   | C2-P2-O14-Mo2   | -76.8(5)  |
| O8-P2-O14-Mo1   | 26.4(5)   | O12-P2-O14-Mo1  | -95.7(5)  |
| C2-P2-O14-Mo1   | 148.1(4)  | O11-P1-O18-Mo2  | 157.8(4)  |
| O3-P1-O18-Mo2   | 36.2(5)   | C1-P1-O18-Mo2   | -82.6(5)  |
| O11-P1-O18-Mo3  | 15.6(5)   | O3-P1-O18-Mo3   | -106.0(4) |
| C1-P1-O18-Mo3   | 135.2(4)  | O20-Mo2-O19-Mo3 | -169.8(4) |
| O16-Mo2-O19-Mo3 | 84.6(4)   | O21-Mo2-O19-Mo3 | -40.1(7)  |
| O14-Mo2-O19-Mo3 | -82.5(4)  | O18-Mo2-O19-Mo3 | -3.6(3)   |
| O1-Mo1-O21-Mo2  | -79.2(4)  | O2-Mo1-O21-Mo2  | 175.4(4)  |
| O4-Mo1-O21-Mo2  | 44.0(7)   | O3-Mo1-O21-Mo2  | 82.2(4)   |
| O14-Mo1-O21-Mo2 | 4.9(3)    | O11-P1-C1-C5    | 64.9(7)   |

|                 |           |                 |           |
|-----------------|-----------|-----------------|-----------|
| O3-P1-C1-C5     | -176.0(6) | O18-P1-C1-C5    | -55.8(7)  |
| O8-P2-C2-C3     | -45.1(7)  | O14-P2-C2-C3    | -166.5(6) |
| O12-P2-C2-C3    | 74.8(7)   | P2-C2-C3-C8     | 126.2(7)  |
| P2-C2-C3-C4     | -54.4(10) | C8-C3-C4-C5     | -3.4(12)  |
| C2-C3-C4-C5     | 177.2(8)  | C3-C4-C5-C6     | 1.3(12)   |
| C3-C4-C5-C1     | -176.3(7) | C4-C5-C6-C7     | 1.7(13)   |
| C1-C5-C6-C7     | 179.2(8)  | C5-C6-C7-C8     | -2.6(14)  |
| C6-C7-C8-C3     | 0.4(14)   | C4-C3-C8-C7     | 2.5(12)   |
| C2-C3-C8-C7     | -178.1(8) | C10-N1-C9-C11   | 0.9(17)   |
| C9-N1-C10-C13   | -4.9(16)  | N1-C9-C11-C12   | 3.7(18)   |
| C14-N2-C12-C11  | -19.5(16) | C14-N2-C12-C13  | 162.0(9)  |
| C9-C11-C12-N2   | 177.5(10) | C9-C11-C12-C13  | -4.0(16)  |
| N1-C10-C13-C12  | 4.2(15)   | N2-C12-C13-C10  | 178.8(8)  |
| C11-C12-C13-C10 | 0.2(14)   | C12-N2-C14-C16  | 174.0(8)  |
| C12-N2-C14-C15  | -8.2(14)  | C16-C14-C15-C17 | -2.7(13)  |
| N2-C14-C15-C17  | 179.5(9)  | N2-C14-C16-C18  | 179.3(8)  |
| C15-C14-C16-C18 | 1.3(13)   | C18-N3-C17-C15  | -1.6(15)  |
| C14-C15-C17-N3  | 2.9(15)   | C17-N3-C18-C16  | 0.0(13)   |
| C14-C16-C18-N3  | 0.1(13)   | C20-N4-C19-C21  | 2.5(15)   |
| C19-N4-C20-C22  | -4.1(16)  | N4-C19-C21-C23  | 0.8(15)   |
| N4-C20-C22-C23  | 2.4(16)   | C24-N5-C23-C22  | 147.2(11) |
| C24-N5-C23-C21  | -35.1(18) | C20-C22-C23-N5  | 178.7(10) |

|                 |            |                |            |
|-----------------|------------|----------------|------------|
| C20-C22-C23-C21 | 0.8(15)    | C19-C21-C23-N5 | 179.9(10)  |
| C19-C21-C23-C22 | -2.4(15)   | C23-N5-C24-C25 | 0.1(19)    |
| C23-N5-C24-C26  | -176.2(11) | N5-C24-C25-C27 | -175.3(10) |
| C26-C24-C25-C27 | 0.8(16)    | N5-C24-C26-C28 | 174.8(11)  |
| C25-C24-C26-C28 | -1.7(17)   | C28-N6-C27-C25 | -1.3(17)   |
| C24-C25-C27-N6  | 0.7(17)    | C24-C26-C28-N6 | 1.1(18)    |
| C27-N6-C28-C26  | 0.4(18)    |                |            |



**Table S15.** Anisotropic atomic displacement parameters ( $\text{\AA}^2$ ) for  $(\text{H}_24,4'\text{-dpa})_2[\text{Mo}_5\text{O}_{15}(1,3\text{-O}_3\text{PC}_8\text{H}_8\text{PO}_3)]$  (**2**).

The anisotropic atomic displacement factor exponent takes the form:  $-2\pi^2 [ h^2 a^{*2} U_{11} + \dots + 2 h k a^* b^* U_{12} ]$

|     | $U_{11}$   | $U_{22}$   | $U_{33}$  | $U_{23}$   | $U_{13}$   | $U_{12}$  |
|-----|------------|------------|-----------|------------|------------|-----------|
| Mo1 | 0.0161(3)  | 0.0140(3)  | 0.0137(3) | 0.0011(3)  | 0.0021(3)  | 0.0035(3) |
| Mo2 | 0.0213(4)  | 0.0154(3)  | 0.0163(3) | -0.0014(3) | -0.0038(3) | 0.0096(3) |
| Mo3 | 0.0146(3)  | 0.0225(4)  | 0.0176(3) | -0.0043(3) | -0.0003(3) | 0.0099(3) |
| Mo4 | 0.0160(3)  | 0.0174(3)  | 0.0172(3) | 0.0018(3)  | 0.0031(3)  | 0.0097(3) |
| Mo5 | 0.0131(3)  | 0.0148(3)  | 0.0156(3) | 0.0003(3)  | 0.0024(3)  | 0.0030(3) |
| P1  | 0.0128(10) | 0.0156(10) | 0.0141(9) | -0.0015(7) | -0.0022(7) | 0.0062(8) |
| P2  | 0.0124(9)  | 0.0138(9)  | 0.0119(9) | 0.0006(7)  | -0.0001(7) | 0.0053(8) |
| O1  | 0.025(3)   | 0.020(3)   | 0.020(3)  | -0.001(2)  | 0.006(3)   | -0.002(3) |
| O2  | 0.035(4)   | 0.023(3)   | 0.014(3)  | 0.002(2)   | 0.002(3)   | 0.009(3)  |
| O3  | 0.014(3)   | 0.016(3)   | 0.019(3)  | 0.001(2)   | -0.003(2)  | 0.008(2)  |
| O4  | 0.010(3)   | 0.019(3)   | 0.018(3)  | 0.002(2)   | 0.000(2)   | 0.005(2)  |
| O5  | 0.021(3)   | 0.027(3)   | 0.020(3)  | -0.001(2)  | 0.000(2)   | 0.014(3)  |
| O6  | 0.024(3)   | 0.021(3)   | 0.025(3)  | -0.001(2)  | -0.001(3)  | 0.014(3)  |
| O7  | 0.015(3)   | 0.013(3)   | 0.022(3)  | 0.001(2)   | 0.004(2)   | 0.005(2)  |
| O8  | 0.016(3)   | 0.015(3)   | 0.016(3)  | 0.001(2)   | 0.001(2)   | 0.008(2)  |
| O9  | 0.024(3)   | 0.018(3)   | 0.021(3)  | 0.001(2)   | 0.004(3)   | 0.004(3)  |
| O10 | 0.013(3)   | 0.026(3)   | 0.020(3)  | -0.004(2)  | 0.001(2)   | 0.006(3)  |
| O11 | 0.014(3)   | 0.019(3)   | 0.020(3)  | -0.002(2)  | -0.001(2)  | 0.006(2)  |

|     | <b>U<sub>11</sub></b> | <b>U<sub>22</sub></b> | <b>U<sub>33</sub></b> | <b>U<sub>23</sub></b> | <b>U<sub>13</sub></b> | <b>U<sub>12</sub></b> |
|-----|-----------------------|-----------------------|-----------------------|-----------------------|-----------------------|-----------------------|
| O12 | 0.013(3)              | 0.016(3)              | 0.015(3)              | 0.003(2)              | 0.000(2)              | 0.006(2)              |
| O13 | 0.020(3)              | 0.039(4)              | 0.033(4)              | -0.008(3)             | -0.003(3)             | 0.021(3)              |
| O14 | 0.019(3)              | 0.015(3)              | 0.014(3)              | 0.004(2)              | 0.003(2)              | 0.010(2)              |
| O15 | 0.024(3)              | 0.018(3)              | 0.025(3)              | -0.005(3)             | 0.004(3)              | 0.003(3)              |
| O16 | 0.032(4)              | 0.021(3)              | 0.028(3)              | -0.004(3)             | -0.008(3)             | 0.016(3)              |
| O17 | 0.028(4)              | 0.033(4)              | 0.020(3)              | -0.008(3)             | 0.001(3)              | 0.009(3)              |
| O18 | 0.015(3)              | 0.012(3)              | 0.017(3)              | 0.000(2)              | -0.002(2)             | 0.009(2)              |
| O19 | 0.022(3)              | 0.015(3)              | 0.017(3)              | -0.006(2)             | -0.003(2)             | 0.008(2)              |
| O20 | 0.031(4)              | 0.018(3)              | 0.025(3)              | -0.004(3)             | -0.005(3)             | 0.012(3)              |
| O21 | 0.027(3)              | 0.017(3)              | 0.014(3)              | 0.003(2)              | -0.001(2)             | 0.011(3)              |
| N1  | 0.051(6)              | 0.025(4)              | 0.030(5)              | -0.003(4)             | -0.016(4)             | 0.011(4)              |
| N2  | 0.021(4)              | 0.022(4)              | 0.024(4)              | -0.003(3)             | -0.008(3)             | 0.011(3)              |
| N3  | 0.011(3)              | 0.023(4)              | 0.027(4)              | 0.004(3)              | -0.001(3)             | 0.005(3)              |
| N4  | 0.032(5)              | 0.027(4)              | 0.035(5)              | -0.007(4)             | 0.000(4)              | 0.013(4)              |
| N5  | 0.041(5)              | 0.030(5)              | 0.028(4)              | 0.002(4)              | 0.007(4)              | 0.016(4)              |
| N6  | 0.033(5)              | 0.039(6)              | 0.075(8)              | -0.022(5)             | -0.016(5)             | 0.027(5)              |
| C1  | 0.019(4)              | 0.023(4)              | 0.013(4)              | -0.001(3)             | -0.005(3)             | 0.013(3)              |
| C2  | 0.017(4)              | 0.014(4)              | 0.011(3)              | 0.002(3)              | -0.001(3)             | 0.005(3)              |
| C3  | 0.015(4)              | 0.014(4)              | 0.012(4)              | 0.001(3)              | 0.004(3)              | 0.007(3)              |
| C4  | 0.016(4)              | 0.024(4)              | 0.012(4)              | 0.000(3)              | -0.001(3)             | 0.011(3)              |
| C5  | 0.012(4)              | 0.016(4)              | 0.021(4)              | 0.000(3)              | 0.004(3)              | 0.005(3)              |

|     | <b>U<sub>11</sub></b> | <b>U<sub>22</sub></b> | <b>U<sub>33</sub></b> | <b>U<sub>23</sub></b> | <b>U<sub>13</sub></b> | <b>U<sub>12</sub></b> |
|-----|-----------------------|-----------------------|-----------------------|-----------------------|-----------------------|-----------------------|
| C6  | 0.023(4)              | 0.020(4)              | 0.015(4)              | 0.004(3)              | 0.000(3)              | 0.010(4)              |
| C7  | 0.013(4)              | 0.022(4)              | 0.021(4)              | -0.002(3)             | -0.004(3)             | 0.004(3)              |
| C8  | 0.015(4)              | 0.017(4)              | 0.020(4)              | 0.002(3)              | 0.004(3)              | 0.005(3)              |
| C9  | 0.049(7)              | 0.034(6)              | 0.022(5)              | -0.004(4)             | -0.005(4)             | 0.015(5)              |
| C10 | 0.035(6)              | 0.018(5)              | 0.046(6)              | -0.002(4)             | -0.013(5)             | 0.011(4)              |
| C11 | 0.038(6)              | 0.024(5)              | 0.027(5)              | 0.002(4)              | -0.003(4)             | 0.004(5)              |
| C12 | 0.030(5)              | 0.018(4)              | 0.020(4)              | 0.005(3)              | -0.005(4)             | 0.010(4)              |
| C13 | 0.029(5)              | 0.020(4)              | 0.039(5)              | -0.002(4)             | -0.016(4)             | 0.013(4)              |
| C14 | 0.016(4)              | 0.007(4)              | 0.022(4)              | 0.005(3)              | 0.002(3)              | -0.001(3)             |
| C15 | 0.034(5)              | 0.021(5)              | 0.020(4)              | -0.002(3)             | 0.006(4)              | 0.012(4)              |
| C16 | 0.020(4)              | 0.015(4)              | 0.023(4)              | 0.002(3)              | -0.002(3)             | 0.008(3)              |
| C17 | 0.024(5)              | 0.025(5)              | 0.033(5)              | 0.001(4)              | 0.008(4)              | 0.014(4)              |
| C18 | 0.021(4)              | 0.023(4)              | 0.018(4)              | -0.002(3)             | -0.004(3)             | 0.011(4)              |
| C19 | 0.021(5)              | 0.029(5)              | 0.022(4)              | 0.001(4)              | -0.001(4)             | 0.003(4)              |
| C20 | 0.030(5)              | 0.024(5)              | 0.038(6)              | -0.004(4)             | -0.002(4)             | 0.013(4)              |
| C21 | 0.019(5)              | 0.022(5)              | 0.041(6)              | 0.001(4)              | -0.003(4)             | 0.004(4)              |
| C22 | 0.029(5)              | 0.025(5)              | 0.026(5)              | 0.001(4)              | 0.001(4)              | 0.006(4)              |
| C23 | 0.031(5)              | 0.021(5)              | 0.027(5)              | 0.002(4)              | 0.008(4)              | 0.010(4)              |
| C24 | 0.015(4)              | 0.025(5)              | 0.041(6)              | -0.009(4)             | 0.002(4)              | 0.000(4)              |
| C25 | 0.030(6)              | 0.037(6)              | 0.050(7)              | -0.001(5)             | 0.001(5)              | 0.019(5)              |
| C26 | 0.043(7)              | 0.052(7)              | 0.040(6)              | -0.011(5)             | -0.015(5)             | 0.028(6)              |

|     | <b>U<sub>11</sub></b> | <b>U<sub>22</sub></b> | <b>U<sub>33</sub></b> | <b>U<sub>23</sub></b> | <b>U<sub>13</sub></b> | <b>U<sub>12</sub></b> |
|-----|-----------------------|-----------------------|-----------------------|-----------------------|-----------------------|-----------------------|
| C27 | 0.029(6)              | 0.027(6)              | 0.071(9)              | -0.004(5)             | 0.001(6)              | 0.011(5)              |
| C28 | 0.031(6)              | 0.054(8)              | 0.051(7)              | -0.023(6)             | -0.015(5)             | 0.021(6)              |

**Table S16.** Hydrogen atomic coordinates and isotropic atomic displacement parameters ( $\text{\AA}^2$ ) for  $(\text{H}_24,4'\text{-dpa})_2[\text{Mo}_5\text{O}_{15}(1,3\text{-O}_3\text{PC}_8\text{H}_8\text{PO}_3)]$  (**2**).

|     | <b>x/a</b> | <b>y/b</b> | <b>z/c</b> | <b>U(eq)</b> |
|-----|------------|------------|------------|--------------|
| H1' | -0.2124    | -0.2781    | 0.1021     | 0.046        |
| H2' | -0.0182    | 0.0216     | 0.2662     | 0.027        |
| H3' | 0.5245     | 0.2549     | 0.3073     | 0.026        |
| H4' | 0.4137     | -0.1244    | 0.4150     | 0.038        |
| H5' | 0.3341     | 0.0863     | 0.5797     | 0.041        |
| H6' | 0.3998     | 0.5950     | 0.5759     | 0.054        |
| H1A | 0.8452     | 0.6261     | 0.2393     | 0.02         |
| H1B | 0.7816     | 0.4679     | 0.2241     | 0.02         |
| H2A | 1.1245     | 0.7507     | 0.4855     | 0.018        |
| H2B | 0.9639     | 0.7020     | 0.4886     | 0.018        |
| H4  | 0.8198     | 0.4219     | 0.5146     | 0.02         |
| H6  | 0.9941     | 0.3612     | 0.6341     | 0.024        |
| H7  | 1.1859     | 0.5778     | 0.6243     | 0.025        |
| H8  | 1.2047     | 0.7161     | 0.5583     | 0.022        |
| H9  | 0.0182     | -0.1427    | 0.0944     | 0.045        |
| H10 | -0.3335    | -0.2773    | 0.1656     | 0.041        |
| H11 | 0.1404     | 0.0038     | 0.1582     | 0.042        |
| H13 | -0.2177    | -0.1532    | 0.2352     | 0.035        |
| H15 | 0.2621     | 0.0107     | 0.2100     | 0.031        |

|     | <b>x/a</b> | <b>y/b</b> | <b>z/c</b> | <b>U(eq)</b> |
|-----|------------|------------|------------|--------------|
| H16 | 0.1370     | 0.1658     | 0.3191     | 0.024        |
| H17 | 0.4835     | 0.1339     | 0.2403     | 0.032        |
| H18 | 0.3658     | 0.2801     | 0.3491     | 0.025        |
| H19 | 0.3096     | -0.0007    | 0.3980     | 0.034        |
| H20 | 0.4729     | -0.1528    | 0.4892     | 0.037        |
| H21 | 0.2760     | 0.1196     | 0.4589     | 0.036        |
| H22 | 0.4533     | -0.0276    | 0.5525     | 0.036        |
| H25 | 0.3881     | 0.3176     | 0.4848     | 0.046        |
| H26 | 0.3272     | 0.2380     | 0.6294     | 0.052        |
| H27 | 0.4123     | 0.5359     | 0.4991     | 0.053        |
| H28 | 0.3579     | 0.4561     | 0.6411     | 0.054        |

**Table S17.** Sample and crystal data for [Co(terpy)<sub>2</sub>](H<sub>3</sub>O)[Mo<sub>5</sub>O<sub>15</sub>(1,4-O<sub>3</sub>PC<sub>8</sub>H<sub>8</sub>PO<sub>3</sub>)] · H<sub>2</sub>O (3·H<sub>2</sub>O).

|                        |                                                                                                                                                                      |         |
|------------------------|----------------------------------------------------------------------------------------------------------------------------------------------------------------------|---------|
| Identification code    | [Co(terpy) <sub>2</sub> ](H <sub>3</sub> O)[Mo <sub>5</sub> O <sub>15</sub> (1,4-O <sub>3</sub> PC <sub>8</sub> H <sub>8</sub> PO <sub>3</sub> )] · H <sub>2</sub> O |         |
| Chemical formula       | C <sub>38</sub> H <sub>35</sub> CoMo <sub>5</sub> N <sub>6</sub> O <sub>23</sub> P <sub>2</sub>                                                                      |         |
| Formula weight         | 1544.29                                                                                                                                                              |         |
| Temperature            | 90(2) K                                                                                                                                                              |         |
| Wavelength             | 0.71073 Å                                                                                                                                                            |         |
| Crystal size           | 0.059 x 0.099 x 0.291 mm                                                                                                                                             |         |
| Crystal system         | Orthorhombic                                                                                                                                                         |         |
| Space group            | P n a 21                                                                                                                                                             |         |
| Unit cell dimensions   | a = 23.327(3) Å                                                                                                                                                      | α = 90° |
|                        | b = 21.115(3) Å                                                                                                                                                      | β = 90° |
|                        | c = 9.7462(14) Å                                                                                                                                                     | γ = 90° |
| Volume                 | 4800.5(11) Å <sup>3</sup>                                                                                                                                            |         |
| Z                      | 4                                                                                                                                                                    |         |
| Density (calculated)   | 2.137 g/cm <sup>3</sup>                                                                                                                                              |         |
| Absorption coefficient | 1.763 mm <sup>-1</sup>                                                                                                                                               |         |
| F(000)                 | 3024                                                                                                                                                                 |         |

**Table S18.** Data collection and structure refinement for [Co(terpy)<sub>2</sub>](H<sub>3</sub>O)[Mo<sub>5</sub>O<sub>15</sub>(1,4-O<sub>3</sub>PC<sub>8</sub>H<sub>8</sub>PO<sub>3</sub>)] · H<sub>2</sub>O (**3** · H<sub>2</sub>O).

|                                     |                                                                                                                                                                       |                           |
|-------------------------------------|-----------------------------------------------------------------------------------------------------------------------------------------------------------------------|---------------------------|
| Theta range for data collection     | 2.00 to 27.12°                                                                                                                                                        |                           |
| Index ranges                        | -29 ≤ h ≤ 29, -27 ≤ k ≤ 27, -12 ≤ l ≤ 12                                                                                                                              |                           |
| Reflections collected               | 56796                                                                                                                                                                 |                           |
| Independent reflections             | 10565 [R(int) = 0.0631]                                                                                                                                               |                           |
| Coverage of independent reflections | 99.7%                                                                                                                                                                 |                           |
| Absorption correction               | multi-scan                                                                                                                                                            |                           |
| Max. and min. transmission          | 0.9030 and 0.6280                                                                                                                                                     |                           |
| Refinement method                   | Full-matrix least-squares on F <sup>2</sup>                                                                                                                           |                           |
| Refinement program                  | SHELXL-2013 (Sheldrick, 2013)                                                                                                                                         |                           |
| Function minimized                  | Σ w(F <sub>o</sub> <sup>2</sup> - F <sub>c</sub> <sup>2</sup> ) <sup>2</sup>                                                                                          |                           |
| Data / restraints / parameters      | 10565 / 1 / 677                                                                                                                                                       |                           |
| Goodness-of-fit on F <sup>2</sup>   | 1.030                                                                                                                                                                 |                           |
| Δ/σ <sub>max</sub>                  | 0.003                                                                                                                                                                 |                           |
| Final R indices                     | 9133 data; I > 2σ(I)                                                                                                                                                  | R1 = 0.0395, wR2 = 0.0864 |
|                                     | all data                                                                                                                                                              | R1 = 0.0494, wR2 = 0.0903 |
| Weighting scheme                    | w = 1/[σ <sup>2</sup> (F <sub>o</sub> <sup>2</sup> ) + (0.0484P) <sup>2</sup> + 0.5799P]<br>where P = (F <sub>o</sub> <sup>2</sup> + 2F <sub>c</sub> <sup>2</sup> )/3 |                           |
| Absolute structure parameter        | 0.5(0)                                                                                                                                                                |                           |
| Largest diff. peak and hole         | 1.212 and -0.970 eÅ <sup>-3</sup>                                                                                                                                     |                           |
| R.M.S. deviation from mean          | 0.126 eÅ <sup>-3</sup>                                                                                                                                                |                           |



**Table S19.** Atomic coordinates and equivalent isotropic atomic displacement parameters ( $\text{\AA}^2$ ) for  $[\text{Co}(\text{terpy})_2](\text{H}_3\text{O})[\text{Mo}_5\text{O}_{15}(1,4\text{-O}_3\text{PC}_8\text{H}_8\text{PO}_3)] \cdot \text{H}_2\text{O} (\mathbf{3} \cdot \text{H}_2\text{O})$ .

$U(\text{eq})$  is defined as one third of the trace of the orthogonalized  $U_{ij}$  tensor.

|     | <b>x/a</b>  | <b>y/b</b>  | <b>z/c</b>  | <b>U(eq)</b> |
|-----|-------------|-------------|-------------|--------------|
| Mo1 | 0.75696(3)  | 0.92314(4)  | 0.32527(8)  | 0.01853(18)  |
| Mo2 | 0.61693(3)  | 0.93485(4)  | 0.23037(7)  | 0.01616(17)  |
| Mo3 | 0.61298(3)  | 0.07301(4)  | 0.99838(7)  | 0.01656(17)  |
| Mo4 | 0.75036(3)  | 0.09118(4)  | 0.89464(8)  | 0.01780(17)  |
| Mo5 | 0.83816(3)  | 0.00636(4)  | 0.10279(10) | 0.01834(16)  |
| Co1 | 0.49721(5)  | 0.26827(4)  | 0.36109(15) | 0.0127(2)    |
| P1  | 0.71081(10) | 0.07357(10) | 0.2376(2)   | 0.0153(5)    |
| P2  | 0.78928(10) | 0.43757(10) | 0.4819(2)   | 0.0142(5)    |
| O1  | 0.6986(3)   | 0.0042(3)   | 0.2806(6)   | 0.0142(13)   |
| O2  | 0.6802(3)   | 0.8874(3)   | 0.2978(6)   | 0.0198(14)   |
| O3  | 0.7550(3)   | 0.9340(3)   | 0.5004(7)   | 0.0276(16)   |
| O4  | 0.7927(3)   | 0.8530(3)   | 0.3053(7)   | 0.0245(15)   |
| O5  | 0.8162(3)   | 0.9839(3)   | 0.2878(6)   | 0.0201(14)   |
| O6  | 0.5942(3)   | 0.9653(3)   | 0.3914(7)   | 0.0246(14)   |
| O7  | 0.5651(3)   | 0.8789(3)   | 0.2036(7)   | 0.0233(15)   |
| O8  | 0.5926(2)   | 0.0036(3)   | 0.1123(8)   | 0.0188(11)   |
| O9  | 0.5895(3)   | 0.0428(3)   | 0.8353(7)   | 0.0216(14)   |
| O10 | 0.5607(3)   | 0.1266(3)   | 0.0274(7)   | 0.0267(16)   |

|     | <b>x/a</b> | <b>y/b</b> | <b>z/c</b> | <b>U(eq)</b> |
|-----|------------|------------|------------|--------------|
| O11 | 0.6551(3)  | 0.1029(3)  | 0.1858(6)  | 0.0181(13)   |
| O12 | 0.6732(3)  | 0.1234(3)  | 0.9288(6)  | 0.0201(14)   |
| O13 | 0.7454(3)  | 0.0814(3)  | 0.7207(7)  | 0.0264(16)   |
| O14 | 0.7858(3)  | 0.1616(3)  | 0.9133(7)  | 0.0268(15)   |
| O15 | 0.8116(3)  | 0.0305(3)  | 0.9223(6)  | 0.0212(14)   |
| O16 | 0.7594(3)  | 0.0756(3)  | 0.1288(6)  | 0.0173(14)   |
| O17 | 0.8828(3)  | 0.9458(3)  | 0.0597(8)  | 0.0308(17)   |
| O18 | 0.8831(3)  | 0.0678(3)  | 0.1388(8)  | 0.0289(17)   |
| O19 | 0.7403(3)  | 0.4362(3)  | 0.5879(7)  | 0.0186(13)   |
| O20 | 0.8042(3)  | 0.5068(3)  | 0.4405(6)  | 0.0160(14)   |
| O21 | 0.8427(3)  | 0.4062(3)  | 0.5386(6)  | 0.0171(13)   |
| C1  | 0.7342(4)  | 0.1175(4)  | 0.3871(9)  | 0.0203(19)   |
| C2  | 0.7412(4)  | 0.1891(4)  | 0.3697(9)  | 0.0174(19)   |
| C3  | 0.7807(4)  | 0.2152(4)  | 0.2761(10) | 0.021(2)     |
| C4  | 0.7114(4)  | 0.2315(5)  | 0.4493(10) | 0.021(2)     |
| C5  | 0.7892(4)  | 0.2804(4)  | 0.2660(10) | 0.020(2)     |
| C6  | 0.7177(4)  | 0.2974(4)  | 0.4421(9)  | 0.0186(19)   |
| C7  | 0.7576(4)  | 0.3234(4)  | 0.3473(9)  | 0.0197(19)   |
| C8  | 0.7660(4)  | 0.3942(4)  | 0.3322(9)  | 0.0178(18)   |
| N1  | 0.4266(3)  | 0.2770(3)  | 0.4651(7)  | 0.0153(16)   |
| N2  | 0.4940(3)  | 0.3565(3)  | 0.3582(9)  | 0.0160(14)   |

|     | <b>x/a</b> | <b>y/b</b> | <b>z/c</b> | <b>U(eq)</b> |
|-----|------------|------------|------------|--------------|
| N3  | 0.5671(3)  | 0.2817(3)  | 0.2574(7)  | 0.0136(15)   |
| N4  | 0.5405(3)  | 0.2601(3)  | 0.5308(7)  | 0.0154(16)   |
| N5  | 0.4991(3)  | 0.1802(3)  | 0.3643(9)  | 0.0138(12)   |
| N6  | 0.4545(3)  | 0.2534(3)  | 0.1930(7)  | 0.0149(16)   |
| C9  | 0.3937(4)  | 0.2304(4)  | 0.5168(9)  | 0.0168(19)   |
| C10 | 0.3457(4)  | 0.2427(4)  | 0.5954(9)  | 0.0176(18)   |
| C11 | 0.3306(4)  | 0.3057(5)  | 0.6220(9)  | 0.023(2)     |
| C12 | 0.3640(4)  | 0.3531(4)  | 0.5687(9)  | 0.020(2)     |
| C13 | 0.4115(4)  | 0.3389(4)  | 0.4883(9)  | 0.0188(19)   |
| C14 | 0.4500(4)  | 0.3850(4)  | 0.4233(8)  | 0.0181(19)   |
| C15 | 0.4465(4)  | 0.4512(4)  | 0.4226(10) | 0.024(2)     |
| C16 | 0.4882(4)  | 0.4842(4)  | 0.3517(12) | 0.032(2)     |
| C17 | 0.5335(4)  | 0.4535(4)  | 0.2847(9)  | 0.025(2)     |
| C18 | 0.5356(4)  | 0.3876(4)  | 0.2884(9)  | 0.0172(19)   |
| C19 | 0.5775(4)  | 0.3444(4)  | 0.2269(9)  | 0.0173(18)   |
| C20 | 0.6238(4)  | 0.3620(5)  | 0.1503(10) | 0.024(2)     |
| C21 | 0.6605(4)  | 0.3142(4)  | 0.0970(11) | 0.023(2)     |
| C22 | 0.6022(4)  | 0.2375(4)  | 0.2084(9)  | 0.0148(18)   |
| C23 | 0.6500(4)  | 0.2522(4)  | 0.1257(8)  | 0.019(2)     |
| C24 | 0.5623(4)  | 0.3065(5)  | 0.6070(10) | 0.025(2)     |
| C25 | 0.5928(4)  | 0.2942(5)  | 0.7268(11) | 0.029(2)     |

|     | <b>x/a</b> | <b>y/b</b> | <b>z/c</b> | <b>U(eq)</b> |
|-----|------------|------------|------------|--------------|
| C26 | 0.6007(5)  | 0.2322(5)  | 0.7678(11) | 0.034(3)     |
| C27 | 0.5788(5)  | 0.1841(6)  | 0.6879(12) | 0.036(3)     |
| C28 | 0.5486(4)  | 0.1986(4)  | 0.5701(9)  | 0.0173(19)   |
| C29 | 0.5244(4)  | 0.1518(4)  | 0.4728(10) | 0.0189(19)   |
| C30 | 0.5247(4)  | 0.0867(4)  | 0.4812(12) | 0.025(2)     |
| C31 | 0.4998(4)  | 0.0526(4)  | 0.3756(14) | 0.030(2)     |
| C32 | 0.4733(4)  | 0.0819(4)  | 0.2656(12) | 0.025(2)     |
| C33 | 0.4739(4)  | 0.1479(4)  | 0.2621(10) | 0.0168(19)   |
| C34 | 0.4487(4)  | 0.1912(4)  | 0.1612(10) | 0.018(2)     |
| C35 | 0.4200(4)  | 0.1717(5)  | 0.0411(9)  | 0.024(2)     |
| C36 | 0.3966(5)  | 0.2173(5)  | 0.9578(10) | 0.032(3)     |
| C37 | 0.4032(4)  | 0.2807(5)  | 0.9894(11) | 0.031(2)     |
| C38 | 0.4325(4)  | 0.2980(4)  | 0.1093(10) | 0.021(2)     |
| O90 | 0.6491(3)  | 0.0016(5)  | 0.6209(11) | 0.062(2)     |
| O91 | 0.8432(3)  | 0.0018(3)  | 0.6504(6)  | 0.0317(16)   |

**Table S20.** Bond lengths (Å) for [Co(terpy)<sub>2</sub>](H<sub>3</sub>O)[Mo<sub>5</sub>O<sub>15</sub>(1,4-O<sub>3</sub>PC<sub>8</sub>H<sub>8</sub>PO<sub>3</sub>)] · H<sub>2</sub>O (**3**·H<sub>2</sub>O).

|         |          |         |          |
|---------|----------|---------|----------|
| Mo1-O4  | 1.710(6) | Mo1-O3  | 1.723(7) |
| Mo1-O5  | 1.920(7) | Mo1-O2  | 1.962(6) |
| Mo1-O1  | 2.230(6) | Mo1-O19 | 2.331(6) |
| Mo2-O7  | 1.711(6) | Mo2-O6  | 1.777(6) |
| Mo2-O2  | 1.900(6) | Mo2-O8  | 1.937(7) |
| Mo2-O21 | 2.179(6) | Mo2-O1  | 2.453(6) |
| Mo3-O10 | 1.688(7) | Mo3-O9  | 1.798(6) |
| Mo3-O12 | 1.888(6) | Mo3-O8  | 1.900(7) |
| Mo3-O11 | 2.169(6) | Mo3-O20 | 2.450(6) |
| Mo4-O14 | 1.711(6) | Mo4-O13 | 1.712(7) |
| Mo4-O15 | 1.938(7) | Mo4-O12 | 1.954(6) |
| Mo4-O20 | 2.236(6) | Mo4-O16 | 2.316(6) |
| Mo5-O17 | 1.700(7) | Mo5-O18 | 1.704(6) |
| Mo5-O5  | 1.934(6) | Mo5-O15 | 1.933(6) |
| Mo5-O19 | 2.358(6) | Mo5-O16 | 2.362(7) |
| Co1-N5  | 1.860(6) | Co1-N2  | 1.864(6) |
| Co1-N3  | 1.938(7) | Co1-N1  | 1.942(8) |
| Co1-N6  | 1.943(7) | Co1-N4  | 1.946(7) |
| P1-O11  | 1.525(6) | P1-O1   | 1.550(6) |
| P1-O16  | 1.553(7) | P1-C1   | 1.812(9) |
| P2-O21  | 1.515(6) | P2-O19  | 1.541(7) |

|         |           |         |           |
|---------|-----------|---------|-----------|
| P2-O20  | 1.555(6)  | P2-C8   | 1.806(9)  |
| O19-Mo1 | 2.331(6)  | O19-Mo5 | 2.358(6)  |
| O20-Mo4 | 2.236(6)  | O20-Mo3 | 2.451(6)  |
| O21-Mo2 | 2.179(6)  | C1-C2   | 1.529(12) |
| C1-H1A  | 0.97      | C1-H1B  | 0.97      |
| C2-C4   | 1.373(12) | C2-C3   | 1.409(13) |
| C3-C5   | 1.395(12) | C3-H3   | 0.93      |
| C4-C6   | 1.401(13) | C4-H4   | 0.93      |
| C5-C7   | 1.412(12) | C5-H5   | 0.93      |
| C6-C7   | 1.422(12) | C6-H6   | 0.93      |
| C7-C8   | 1.516(12) | C8-H8A  | 0.97      |
| C8-H8B  | 0.97      | N1-C9   | 1.346(11) |
| N1-C13  | 1.373(11) | N2-C14  | 1.349(11) |
| N2-C18  | 1.354(12) | N3-C22  | 1.329(11) |
| N3-C19  | 1.379(11) | N4-C24  | 1.330(12) |
| N4-C28  | 1.367(11) | N5-C33  | 1.343(12) |
| N5-C29  | 1.352(12) | N6-C38  | 1.347(11) |
| N6-C34  | 1.355(11) | C9-C10  | 1.383(13) |
| C9-H9   | 0.93      | C10-C11 | 1.401(12) |
| C10-H10 | 0.93      | C11-C12 | 1.369(13) |
| C11-H11 | 0.93      | C12-C13 | 1.389(12) |
| C12-H12 | 0.93      | C13-C14 | 1.466(12) |

|          |           |          |           |
|----------|-----------|----------|-----------|
| C14-C15  | 1.400(12) | C15-C16  | 1.382(13) |
| C15-H15  | 0.93      | C16-C17  | 1.401(14) |
| C16-H16  | 0.93      | C17-C18  | 1.393(12) |
| C17-H17  | 0.93      | C18-C19  | 1.466(12) |
| C19-C20  | 1.364(13) | C20-C21  | 1.422(13) |
| C20-H20  | 0.93      | C21-C23  | 1.362(12) |
| C21-H21  | 0.93      | C22-C23  | 1.411(12) |
| C22-H22  | 0.93      | C23-H23  | 0.93      |
| C24-C25  | 1.392(13) | C24-H24  | 0.93      |
| C25-C26  | 1.381(15) | C25-H25  | 0.93      |
| C26-C27  | 1.378(16) | C26-H26  | 0.93      |
| C27-C28  | 1.383(14) | C27-H27  | 0.93      |
| C28-C29  | 1.481(13) | C29-C30  | 1.377(13) |
| C30-C31  | 1.384(16) | C30-H30  | 0.93      |
| C31-C32  | 1.383(16) | C31-H31  | 0.93      |
| C32-C33  | 1.395(12) | C32-H32  | 0.93      |
| C33-C34  | 1.465(13) | C34-C35  | 1.410(13) |
| C35-C36  | 1.374(14) | C35-H35  | 0.93      |
| C36-C37  | 1.382(15) | C36-H36  | 0.93      |
| C37-C38  | 1.402(13) | C37-H37  | 0.93      |
| C38-H38  | 0.93      | O90-H90A | 0.8488    |
| O90-H90B | 0.8575    |          |           |

**Table S21.** Bond angles (°) for [Co(terpy)<sub>2</sub>](H<sub>3</sub>O)[Mo<sub>5</sub>O<sub>15</sub>(1,4-O<sub>3</sub>PC<sub>8</sub>H<sub>8</sub>PO<sub>3</sub>)] ·H<sub>2</sub>O (**3**·H<sub>2</sub>O).

|             |          |             |          |
|-------------|----------|-------------|----------|
| O4-Mo1-O3   | 103.9(3) | O4-Mo1-O5   | 101.9(3) |
| O3-Mo1-O5   | 96.8(3)  | O4-Mo1-O2   | 95.6(3)  |
| O3-Mo1-O2   | 99.4(3)  | O5-Mo1-O2   | 152.6(3) |
| O4-Mo1-O1   | 160.0(3) | O3-Mo1-O1   | 94.3(3)  |
| O5-Mo1-O1   | 83.6(3)  | O2-Mo1-O1   | 73.2(2)  |
| O4-Mo1-O19  | 88.6(3)  | O3-Mo1-O19  | 165.5(3) |
| O5-Mo1-O19  | 73.3(2)  | O2-Mo1-O19  | 86.3(2)  |
| O1-Mo1-O19  | 74.4(2)  | O7-Mo2-O6   | 100.0(3) |
| O7-Mo2-O2   | 103.8(3) | O6-Mo2-O2   | 96.7(3)  |
| O7-Mo2-O8   | 102.7(3) | O6-Mo2-O8   | 99.6(3)  |
| O2-Mo2-O8   | 145.9(2) | O7-Mo2-O21  | 89.0(3)  |
| O6-Mo2-O21  | 170.8(3) | O2-Mo2-O21  | 79.3(2)  |
| O8-Mo2-O21  | 79.9(3)  | O7-Mo2-O1   | 172.8(3) |
| O6-Mo2-O1   | 80.7(3)  | O2-Mo2-O1   | 69.1(2)  |
| O8-Mo2-O1   | 84.2(2)  | O21-Mo2-O1  | 90.0(2)  |
| O10-Mo3-O9  | 99.6(3)  | O10-Mo3-O12 | 102.6(3) |
| O9-Mo3-O12  | 96.3(3)  | O10-Mo3-O8  | 103.8(3) |
| O9-Mo3-O8   | 99.6(3)  | O12-Mo3-O8  | 146.2(2) |
| O10-Mo3-O11 | 89.5(3)  | O9-Mo3-O11  | 170.4(3) |
| O12-Mo3-O11 | 78.5(2)  | O8-Mo3-O11  | 81.1(3)  |
| O10-Mo3-O20 | 172.2(3) | O9-Mo3-O20  | 80.4(2)  |



|             |           |             |          |
|-------------|-----------|-------------|----------|
| O12-Mo3-O20 | 69.7(2)   | O8-Mo3-O20  | 83.8(2)  |
| O11-Mo3-O20 | 90.1(2)   | O14-Mo4-O13 | 104.0(3) |
| O14-Mo4-O15 | 101.7(3)  | O13-Mo4-O15 | 96.2(3)  |
| O14-Mo4-O12 | 97.1(3)   | O13-Mo4-O12 | 98.6(3)  |
| O15-Mo4-O12 | 152.4(3)  | O14-Mo4-O20 | 161.2(3) |
| O13-Mo4-O20 | 93.7(3)   | O15-Mo4-O20 | 82.3(2)  |
| O12-Mo4-O20 | 73.7(2)   | O14-Mo4-O16 | 88.5(3)  |
| O13-Mo4-O16 | 164.9(3)  | O15-Mo4-O16 | 72.6(2)  |
| O12-Mo4-O16 | 88.0(2)   | O20-Mo4-O16 | 75.0(2)  |
| O17-Mo5-O18 | 104.3(3)  | O17-Mo5-O5  | 102.0(3) |
| O18-Mo5-O5  | 99.1(3)   | O17-Mo5-O15 | 99.8(3)  |
| O18-Mo5-O15 | 100.6(3)  | O5-Mo5-O15  | 145.9(2) |
| O17-Mo5-O19 | 89.3(3)   | O18-Mo5-O19 | 165.4(3) |
| O5-Mo5-O19  | 72.4(2)   | O15-Mo5-O19 | 82.0(2)  |
| O17-Mo5-O16 | 165.4(3)  | O18-Mo5-O16 | 89.1(3)  |
| O5-Mo5-O16  | 81.1(2)   | O15-Mo5-O16 | 71.6(2)  |
| O19-Mo5-O16 | 78.00(17) | N5-Co1-N2   | 179.1(3) |
| N5-Co1-N3   | 97.7(3)   | N2-Co1-N3   | 83.1(3)  |
| N5-Co1-N1   | 96.1(3)   | N2-Co1-N1   | 83.1(3)  |
| N3-Co1-N1   | 166.2(3)  | N5-Co1-N6   | 82.2(3)  |
| N2-Co1-N6   | 97.4(3)   | N3-Co1-N6   | 90.9(3)  |
| N1-Co1-N6   | 91.2(3)   | N5-Co1-N4   | 83.4(3)  |

|             |           |             |          |
|-------------|-----------|-------------|----------|
| N2-Co1-N4   | 97.0(3)   | N3-Co1-N4   | 91.1(3)  |
| N1-Co1-N4   | 90.3(3)   | N6-Co1-N4   | 165.6(3) |
| O11-P1-O1   | 108.5(4)  | O11-P1-O16  | 112.6(4) |
| O1-P1-O16   | 110.2(3)  | O11-P1-C1   | 108.3(4) |
| O1-P1-C1    | 108.8(4)  | O16-P1-C1   | 108.4(4) |
| O21-P2-O19  | 111.0(4)  | O21-P2-O20  | 108.7(4) |
| O19-P2-O20  | 110.9(3)  | O21-P2-C8   | 108.7(4) |
| O19-P2-C8   | 108.0(4)  | O20-P2-C8   | 109.5(4) |
| P1-O1-Mo1   | 131.8(4)  | P1-O1-Mo2   | 130.8(3) |
| Mo1-O1-Mo2  | 93.14(19) | Mo2-O2-Mo1  | 123.6(3) |
| Mo1-O5-Mo5  | 122.2(3)  | Mo3-O8-Mo2  | 148.4(3) |
| P1-O11-Mo3  | 123.1(4)  | Mo3-O12-Mo4 | 123.4(3) |
| Mo5-O15-Mo4 | 122.5(3)  | P1-O16-Mo4  | 127.6(4) |
| P1-O16-Mo5  | 128.6(4)  | Mo4-O16-Mo5 | 93.0(2)  |
| P2-O19-Mo1  | 130.3(4)  | P2-O19-Mo5  | 127.3(4) |
| Mo1-O19-Mo5 | 92.0(2)   | P2-O20-Mo4  | 132.3(4) |
| P2-O20-Mo3  | 130.8(3)  | Mo4-O20-Mo3 | 92.3(2)  |
| P2-O21-Mo2  | 123.2(3)  | C2-C1-P1    | 116.7(6) |
| C2-C1-H1A   | 108.1     | P1-C1-H1A   | 108.1    |
| C2-C1-H1B   | 108.1     | P1-C1-H1B   | 108.1    |
| H1A-C1-H1B  | 107.3     | C4-C2-C3    | 116.2(8) |
| C4-C2-C1    | 121.8(8)  | C3-C2-C1    | 121.9(8) |

|            |          |            |          |
|------------|----------|------------|----------|
| C5-C3-C2   | 121.7(8) | C5-C3-H3   | 119.2    |
| C2-C3-H3   | 119.2    | C2-C4-C6   | 124.5(9) |
| C2-C4-H4   | 117.8    | C6-C4-H4   | 117.8    |
| C3-C5-C7   | 121.4(9) | C3-C5-H5   | 119.3    |
| C7-C5-H5   | 119.3    | C4-C6-C7   | 119.0(8) |
| C4-C6-H6   | 120.5    | C7-C6-H6   | 120.5    |
| C5-C7-C6   | 117.3(8) | C5-C7-C8   | 120.8(8) |
| C6-C7-C8   | 121.9(8) | C7-C8-P2   | 117.4(6) |
| C7-C8-H8A  | 107.9    | P2-C8-H8A  | 107.9    |
| C7-C8-H8B  | 107.9    | P2-C8-H8B  | 107.9    |
| H8A-C8-H8B | 107.2    | C9-N1-C13  | 119.2(8) |
| C9-N1-Co1  | 127.5(6) | C13-N1-Co1 | 113.2(6) |
| C14-N2-C18 | 124.4(7) | C14-N2-Co1 | 117.9(6) |
| C18-N2-Co1 | 117.6(6) | C22-N3-C19 | 119.2(8) |
| C22-N3-Co1 | 127.1(6) | C19-N3-Co1 | 113.6(6) |
| C24-N4-C28 | 119.4(8) | C24-N4-Co1 | 127.4(6) |
| C28-N4-Co1 | 113.2(6) | C33-N5-C29 | 123.1(6) |
| C33-N5-Co1 | 119.0(6) | C29-N5-Co1 | 117.9(6) |
| C38-N6-C34 | 120.0(8) | C38-N6-Co1 | 126.3(6) |
| C34-N6-Co1 | 113.6(6) | N1-C9-C10  | 122.2(8) |
| N1-C9-H9   | 118.9    | C10-C9-H9  | 118.9    |
| C9-C10-C11 | 118.9(9) | C9-C10-H10 | 120.5    |

|             |          |             |          |
|-------------|----------|-------------|----------|
| C11-C10-H10 | 120.5    | C12-C11-C10 | 118.7(9) |
| C12-C11-H11 | 120.6    | C10-C11-H11 | 120.6    |
| C11-C12-C13 | 120.7(9) | C11-C12-H12 | 119.6    |
| C13-C12-H12 | 119.6    | N1-C13-C12  | 120.1(8) |
| N1-C13-C14  | 113.8(8) | C12-C13-C14 | 126.1(8) |
| N2-C14-C15  | 119.1(8) | N2-C14-C13  | 111.9(7) |
| C15-C14-C13 | 129.0(8) | C16-C15-C14 | 117.8(9) |
| C16-C15-H15 | 121.1    | C14-C15-H15 | 121.1    |
| C15-C16-C17 | 122.0(8) | C15-C16-H16 | 119.0    |
| C17-C16-H16 | 119.0    | C18-C17-C16 | 118.4(9) |
| C18-C17-H17 | 120.8    | C16-C17-H17 | 120.8    |
| N2-C18-C17  | 118.3(8) | N2-C18-C19  | 112.4(8) |
| C17-C18-C19 | 129.3(8) | C20-C19-N3  | 121.3(8) |
| C20-C19-C18 | 125.6(8) | N3-C19-C18  | 113.1(8) |
| C19-C20-C21 | 118.8(9) | C19-C20-H20 | 120.6    |
| C21-C20-H20 | 120.6    | C23-C21-C20 | 120.0(9) |
| C23-C21-H21 | 120.0    | C20-C21-H21 | 120.0    |
| N3-C22-C23  | 122.6(8) | N3-C22-H22  | 118.7    |
| C23-C22-H22 | 118.7    | C21-C23-C22 | 118.0(9) |
| C21-C23-H23 | 121.0    | C22-C23-H23 | 121.0    |
| N4-C24-C25  | 121.7(9) | N4-C24-H24  | 119.1    |
| C25-C24-H24 | 119.1    | C26-C25-C24 | 119.2(9) |

|             |           |               |           |
|-------------|-----------|---------------|-----------|
| C26-C25-H25 | 120.4     | C24-C25-H25   | 120.4     |
| C27-C26-C25 | 119.1(10) | C27-C26-H26   | 120.5     |
| C25-C26-H26 | 120.5     | C26-C27-C28   | 119.6(10) |
| C26-C27-H27 | 120.2     | C28-C27-H27   | 120.2     |
| N4-C28-C27  | 120.9(9)  | N4-C28-C29    | 113.8(7)  |
| C27-C28-C29 | 125.3(9)  | N5-C29-C30    | 119.5(9)  |
| N5-C29-C28  | 111.7(7)  | C30-C29-C28   | 128.8(9)  |
| C29-C30-C31 | 118.2(9)  | C29-C30-H30   | 120.9     |
| C31-C30-H30 | 120.9     | C30-C31-C32   | 122.1(8)  |
| C30-C31-H31 | 118.9     | C32-C31-H31   | 118.9     |
| C31-C32-C33 | 117.5(9)  | C31-C32-H32   | 121.2     |
| C33-C32-H32 | 121.2     | N5-C33-C32    | 119.6(9)  |
| N5-C33-C34  | 110.9(7)  | C32-C33-C34   | 129.5(9)  |
| N6-C34-C35  | 121.4(9)  | N6-C34-C33    | 114.3(8)  |
| C35-C34-C33 | 124.4(8)  | C36-C35-C34   | 118.3(9)  |
| C36-C35-H35 | 120.9     | C34-C35-H35   | 120.9     |
| C35-C36-C37 | 120.3(9)  | C35-C36-H36   | 119.9     |
| C37-C36-H36 | 119.9     | C36-C37-C38   | 119.4(10) |
| C36-C37-H37 | 120.3     | C38-C37-H37   | 120.3     |
| N6-C38-C37  | 120.6(9)  | N6-C38-H38    | 119.7     |
| C37-C38-H38 | 119.7     | H90A-O90-H90B | 110.4     |

**Table S22.** Torsion angles (°) for [Co(terpy)<sub>2</sub>](H<sub>3</sub>O)[Mo<sub>5</sub>O<sub>15</sub>(1,4-O<sub>3</sub>PC<sub>8</sub>H<sub>8</sub>PO<sub>3</sub>)] ·H<sub>2</sub>O (**3**·H<sub>2</sub>O).

|                 |           |                 |           |
|-----------------|-----------|-----------------|-----------|
| O11-P1-O1-Mo1   | 165.7(4)  | O16-P1-O1-Mo1   | 41.9(6)   |
| C1-P1-O1-Mo1    | -76.7(5)  | O11-P1-O1-Mo2   | 15.5(5)   |
| O16-P1-O1-Mo2   | -108.2(5) | C1-P1-O1-Mo2    | 133.1(5)  |
| O7-Mo2-O2-Mo1   | 171.6(4)  | O6-Mo2-O2-Mo1   | -86.3(4)  |
| O8-Mo2-O2-Mo1   | 31.8(7)   | O21-Mo2-O2-Mo1  | 85.2(4)   |
| O1-Mo2-O2-Mo1   | -9.0(3)   | O1-P1-O11-Mo3   | -67.5(5)  |
| O16-P1-O11-Mo3  | 54.8(5)   | C1-P1-O11-Mo3   | 174.6(4)  |
| O10-Mo3-O12-Mo4 | 172.4(4)  | O9-Mo3-O12-Mo4  | -86.3(4)  |
| O8-Mo3-O12-Mo4  | 31.5(7)   | O11-Mo3-O12-Mo4 | 85.6(4)   |
| O20-Mo3-O12-Mo4 | -8.9(3)   | O11-P1-O16-Mo4  | -17.8(5)  |
| O1-P1-O16-Mo4   | 103.5(4)  | C1-P1-O16-Mo4   | -137.6(4) |
| O11-P1-O16-Mo5  | -152.3(4) | O1-P1-O16-Mo5   | -31.0(5)  |
| C1-P1-O16-Mo5   | 87.9(5)   | O21-P2-O19-Mo1  | 20.3(6)   |
| O20-P2-O19-Mo1  | -100.7(5) | C8-P2-O19-Mo1   | 139.3(4)  |
| O21-P2-O19-Mo5  | 154.9(4)  | O20-P2-O19-Mo5  | 34.0(5)   |
| C8-P2-O19-Mo5   | -86.0(5)  | O21-P2-O20-Mo4  | -164.1(4) |
| O19-P2-O20-Mo4  | -41.8(6)  | C8-P2-O20-Mo4   | 77.2(5)   |
| O21-P2-O20-Mo3  | -15.2(5)  | O19-P2-O20-Mo3  | 107.1(5)  |
| C8-P2-O20-Mo3   | -133.8(5) | O19-P2-O21-Mo2  | -55.3(5)  |
| O20-P2-O21-Mo2  | 67.0(5)   | C8-P2-O21-Mo2   | -173.9(4) |
| O11-P1-C1-C2    | -54.9(8)  | O1-P1-C1-C2     | -172.6(6) |

|                 |           |                |           |
|-----------------|-----------|----------------|-----------|
| O16-P1-C1-C2    | 67.6(8)   | P1-C1-C2-C4    | 121.7(8)  |
| P1-C1-C2-C3     | -61.6(10) | C4-C2-C3-C5    | 0.4(12)   |
| C1-C2-C3-C5     | -176.4(8) | C3-C2-C4-C6    | 0.4(13)   |
| C1-C2-C4-C6     | 177.3(8)  | C2-C3-C5-C7    | -1.3(13)  |
| C2-C4-C6-C7     | -0.4(13)  | C3-C5-C7-C6    | 1.3(13)   |
| C3-C5-C7-C8     | -178.2(8) | C4-C6-C7-C5    | -0.5(12)  |
| C4-C6-C7-C8     | 179.0(8)  | C5-C7-C8-P2    | -120.4(8) |
| C6-C7-C8-P2     | 60.1(10)  | O21-P2-C8-C7   | 52.8(7)   |
| O19-P2-C8-C7    | -67.7(7)  | O20-P2-C8-C7   | 171.4(6)  |
| N3-Co1-N2-C14   | -178.9(7) | N1-Co1-N2-C14  | 0.8(7)    |
| N6-Co1-N2-C14   | 91.1(7)   | N4-Co1-N2-C14  | -88.6(7)  |
| N3-Co1-N2-C18   | 2.4(7)    | N1-Co1-N2-C18  | -177.8(7) |
| N6-Co1-N2-C18   | -87.6(7)  | N4-Co1-N2-C18  | 92.7(7)   |
| N3-Co1-N5-C33   | -89.4(7)  | N1-Co1-N5-C33  | 90.8(7)   |
| N6-Co1-N5-C33   | 0.4(7)    | N4-Co1-N5-C33  | -179.6(7) |
| N3-Co1-N5-C29   | 92.8(7)   | N1-Co1-N5-C29  | -87.0(7)  |
| N6-Co1-N5-C29   | -177.4(7) | N4-Co1-N5-C29  | 2.6(7)    |
| C13-N1-C9-C10   | -1.4(13)  | Co1-N1-C9-C10  | 176.7(6)  |
| N1-C9-C10-C11   | 0.1(13)   | C9-C10-C11-C12 | 0.2(13)   |
| C10-C11-C12-C13 | 0.8(14)   | C9-N1-C13-C12  | 2.4(13)   |
| Co1-N1-C13-C12  | -175.9(7) | C9-N1-C13-C14  | -178.4(7) |
| Co1-N1-C13-C14  | 3.3(9)    | C11-C12-C13-N1 | -2.1(14)  |

|                 |           |                 |           |
|-----------------|-----------|-----------------|-----------|
| C11-C12-C13-C14 | 178.7(9)  | C18-N2-C14-C15  | -1.3(14)  |
| Co1-N2-C14-C15  | -179.9(6) | C18-N2-C14-C13  | 179.3(8)  |
| Co1-N2-C14-C13  | 0.7(10)   | N1-C13-C14-N2   | -2.6(11)  |
| C12-C13-C14-N2  | 176.5(9)  | N1-C13-C14-C15  | 178.1(8)  |
| C12-C13-C14-C15 | -2.7(15)  | N2-C14-C15-C16  | 1.5(13)   |
| C13-C14-C15-C16 | -179.3(9) | C14-C15-C16-C17 | -1.4(15)  |
| C15-C16-C17-C18 | 1.1(15)   | C14-N2-C18-C17  | 1.0(14)   |
| Co1-N2-C18-C17  | 179.6(6)  | C14-N2-C18-C19  | -179.3(8) |
| Co1-N2-C18-C19  | -0.7(10)  | C16-C17-C18-N2  | -0.8(13)  |
| C16-C17-C18-C19 | 179.6(9)  | C22-N3-C19-C20  | -1.5(12)  |
| Co1-N3-C19-C20  | -177.6(7) | C22-N3-C19-C18  | -179.7(7) |
| Co1-N3-C19-C18  | 4.2(9)    | N2-C18-C19-C20  | 179.6(9)  |
| C17-C18-C19-C20 | -0.7(15)  | N2-C18-C19-N3   | -2.3(10)  |
| C17-C18-C19-N3  | 177.3(9)  | N3-C19-C20-C21  | 2.4(14)   |
| C18-C19-C20-C21 | -179.7(9) | C19-C20-C21-C23 | -1.7(15)  |
| C19-N3-C22-C23  | -0.1(12)  | Co1-N3-C22-C23  | 175.5(6)  |
| C20-C21-C23-C22 | 0.3(14)   | N3-C22-C23-C21  | 0.7(13)   |
| C28-N4-C24-C25  | -0.5(14)  | Co1-N4-C24-C25  | -179.8(7) |
| N4-C24-C25-C26  | 0.0(16)   | C24-C25-C26-C27 | 0.8(17)   |
| C25-C26-C27-C28 | -1.1(17)  | C24-N4-C28-C27  | 0.2(14)   |
| Co1-N4-C28-C27  | 179.6(8)  | C24-N4-C28-C29  | -177.3(8) |
| Co1-N4-C28-C29  | 2.1(10)   | C26-C27-C28-N4  | 0.7(16)   |



|                 |           |                 |           |
|-----------------|-----------|-----------------|-----------|
| C26-C27-C28-C29 | 177.9(10) | C33-N5-C29-C30  | -0.1(15)  |
| Co1-N5-C29-C30  | 177.6(7)  | C33-N5-C29-C28  | -179.7(7) |
| Co1-N5-C29-C28  | -2.1(10)  | N4-C28-C29-N5   | -0.1(11)  |
| C27-C28-C29-N5  | -177.5(9) | N4-C28-C29-C30  | -179.7(9) |
| C27-C28-C29-C30 | 2.9(16)   | N5-C29-C30-C31  | 1.2(14)   |
| C28-C29-C30-C31 | -179.2(9) | C29-C30-C31-C32 | -2.0(16)  |
| C30-C31-C32-C33 | 1.7(16)   | C29-N5-C33-C32  | -0.3(15)  |
| Co1-N5-C33-C32  | -177.9(7) | C29-N5-C33-C34  | 178.2(7)  |
| Co1-N5-C33-C34  | 0.6(10)   | C31-C32-C33-N5  | -0.5(14)  |
| C31-C32-C33-C34 | -178.7(9) | C38-N6-C34-C35  | 0.2(13)   |
| Co1-N6-C34-C35  | -178.6(7) | C38-N6-C34-C33  | -179.2(8) |
| Co1-N6-C34-C33  | 2.1(10)   | N5-C33-C34-N6   | -1.7(11)  |
| C32-C33-C34-N6  | 176.6(9)  | N5-C33-C34-C35  | 178.9(9)  |
| C32-C33-C34-C35 | -2.8(16)  | N6-C34-C35-C36  | -1.6(14)  |
| C33-C34-C35-C36 | 177.7(9)  | C34-C35-C36-C37 | 2.4(15)   |
| C35-C36-C37-C38 | -1.9(16)  | C34-N6-C38-C37  | 0.4(13)   |
| Co1-N6-C38-C37  | 179.0(7)  | C36-C37-C38-N6  | 0.5(15)   |

**Table S23.** Anisotropic atomic displacement parameters ( $\text{\AA}^2$ ) for  $[\text{Co}(\text{terpy})_2](\text{H}_3\text{O})$   
 $[\text{Mo}_5\text{O}_{15}(1,4\text{-O}_3\text{PC}_8\text{H}_8\text{PO}_3)] \cdot \text{H}_2\text{O} (3 \cdot \text{H}_2\text{O})$ .

The anisotropic atomic displacement factor exponent takes the form:  $-2\pi^2 [ h^2 a^{*2} U_{11} + \dots + 2 h k a^* b^* U_{12} ]$

|     | $U_{11}$   | $U_{22}$   | $U_{33}$   | $U_{23}$   | $U_{13}$   | $U_{12}$   |
|-----|------------|------------|------------|------------|------------|------------|
| Mo1 | 0.0209(4)  | 0.0205(4)  | 0.0142(4)  | 0.0043(3)  | 0.0020(3)  | 0.0080(3)  |
| Mo2 | 0.0159(4)  | 0.0157(4)  | 0.0170(4)  | 0.0009(3)  | 0.0026(3)  | 0.0008(3)  |
| Mo3 | 0.0177(4)  | 0.0145(4)  | 0.0174(4)  | 0.0010(3)  | -0.0032(3) | -0.0007(3) |
| Mo4 | 0.0204(4)  | 0.0194(4)  | 0.0135(3)  | 0.0034(3)  | -0.0021(3) | -0.0081(3) |
| Mo5 | 0.0147(3)  | 0.0219(4)  | 0.0185(3)  | 0.0013(3)  | -0.0013(4) | -0.0013(4) |
| Co1 | 0.0166(5)  | 0.0088(5)  | 0.0127(4)  | -0.0002(4) | -0.0049(3) | 0.0009(5)  |
| P1  | 0.0194(12) | 0.0123(11) | 0.0141(10) | -0.0011(9) | -0.0018(9) | -0.0005(9) |
| P2  | 0.0165(12) | 0.0131(11) | 0.0129(10) | -0.0005(9) | -0.0038(9) | 0.0001(9)  |
| O1  | 0.016(3)   | 0.011(3)   | 0.015(3)   | 0.001(2)   | -0.001(2)  | 0.002(2)   |
| O2  | 0.028(4)   | 0.009(3)   | 0.022(3)   | 0.002(2)   | 0.003(3)   | 0.004(2)   |
| O3  | 0.031(4)   | 0.037(4)   | 0.015(3)   | 0.005(3)   | 0.004(3)   | 0.012(3)   |
| O4  | 0.026(3)   | 0.023(4)   | 0.025(3)   | 0.005(3)   | 0.005(3)   | 0.015(3)   |
| O5  | 0.020(3)   | 0.025(4)   | 0.015(3)   | -0.003(3)  | -0.005(2)  | 0.000(3)   |
| O6  | 0.027(4)   | 0.029(4)   | 0.018(3)   | -0.002(3)  | 0.005(3)   | 0.006(3)   |
| O7  | 0.021(4)   | 0.021(4)   | 0.028(4)   | -0.001(3)  | 0.005(3)   | -0.003(3)  |
| O8  | 0.016(2)   | 0.019(3)   | 0.022(2)   | -0.001(2)  | 0.002(3)   | 0.005(3)   |
| O9  | 0.020(3)   | 0.020(3)   | 0.025(3)   | 0.000(3)   | -0.007(3)  | -0.003(3)  |
| O10 | 0.029(4)   | 0.025(4)   | 0.027(4)   | 0.008(3)   | -0.006(3)  | 0.001(3)   |

|     | <b>U<sub>11</sub></b> | <b>U<sub>22</sub></b> | <b>U<sub>33</sub></b> | <b>U<sub>23</sub></b> | <b>U<sub>13</sub></b> | <b>U<sub>12</sub></b> |
|-----|-----------------------|-----------------------|-----------------------|-----------------------|-----------------------|-----------------------|
| O11 | 0.022(3)              | 0.015(3)              | 0.017(3)              | -0.001(2)             | -0.003(3)             | 0.004(3)              |
| O12 | 0.019(3)              | 0.020(3)              | 0.022(3)              | 0.003(3)              | -0.006(3)             | -0.005(3)             |
| O13 | 0.033(4)              | 0.029(4)              | 0.017(3)              | 0.007(3)              | -0.005(3)             | -0.012(3)             |
| O14 | 0.029(4)              | 0.027(4)              | 0.025(3)              | 0.008(3)              | -0.002(3)             | -0.012(3)             |
| O15 | 0.018(3)              | 0.026(4)              | 0.020(3)              | 0.002(3)              | 0.008(3)              | -0.009(3)             |
| O16 | 0.021(3)              | 0.018(3)              | 0.013(3)              | -0.002(2)             | -0.004(2)             | -0.008(3)             |
| O17 | 0.021(4)              | 0.037(4)              | 0.034(4)              | 0.008(3)              | 0.006(3)              | 0.003(3)              |
| O18 | 0.027(4)              | 0.028(4)              | 0.032(4)              | 0.002(3)              | -0.009(3)             | -0.011(3)             |
| O19 | 0.020(3)              | 0.021(3)              | 0.015(3)              | 0.001(3)              | 0.001(3)              | -0.003(3)             |
| O20 | 0.016(3)              | 0.014(3)              | 0.018(3)              | -0.001(2)             | 0.000(2)              | 0.004(2)              |
| O21 | 0.020(3)              | 0.013(3)              | 0.018(3)              | -0.001(2)             | -0.008(2)             | 0.001(3)              |
| C1  | 0.025(5)              | 0.021(5)              | 0.015(4)              | -0.003(4)             | -0.007(4)             | -0.004(4)             |
| C2  | 0.018(4)              | 0.022(5)              | 0.012(4)              | -0.002(3)             | -0.008(3)             | 0.000(4)              |
| C3  | 0.022(5)              | 0.017(5)              | 0.023(5)              | -0.016(4)             | -0.006(4)             | 0.001(4)              |
| C4  | 0.018(5)              | 0.028(5)              | 0.017(4)              | -0.003(4)             | -0.001(4)             | -0.003(4)             |
| C5  | 0.014(4)              | 0.024(5)              | 0.020(5)              | -0.001(4)             | -0.002(4)             | -0.007(4)             |
| C6  | 0.020(5)              | 0.022(5)              | 0.013(4)              | 0.001(3)              | -0.001(3)             | -0.002(4)             |
| C7  | 0.014(4)              | 0.023(5)              | 0.021(5)              | -0.012(4)             | 0.002(4)              | -0.005(4)             |
| C8  | 0.019(4)              | 0.024(5)              | 0.011(4)              | -0.001(4)             | 0.004(4)              | 0.000(4)              |
| N1  | 0.018(4)              | 0.010(4)              | 0.017(4)              | -0.003(3)             | -0.007(3)             | 0.007(3)              |
| N2  | 0.022(4)              | 0.012(3)              | 0.015(3)              | -0.001(3)             | -0.004(2)             | -0.003(3)             |

|     | <b>U<sub>11</sub></b> | <b>U<sub>22</sub></b> | <b>U<sub>33</sub></b> | <b>U<sub>23</sub></b> | <b>U<sub>13</sub></b> | <b>U<sub>12</sub></b> |
|-----|-----------------------|-----------------------|-----------------------|-----------------------|-----------------------|-----------------------|
| N3  | 0.016(4)              | 0.016(4)              | 0.009(3)              | 0.003(3)              | -0.005(3)             | 0.000(3)              |
| N4  | 0.016(4)              | 0.013(4)              | 0.017(4)              | 0.007(3)              | -0.007(3)             | -0.008(3)             |
| N5  | 0.012(3)              | 0.009(3)              | 0.020(3)              | 0.003(3)              | -0.001(2)             | -0.003(3)             |
| N6  | 0.015(4)              | 0.019(4)              | 0.011(3)              | 0.000(3)              | -0.002(3)             | 0.004(3)              |
| C9  | 0.024(5)              | 0.008(4)              | 0.018(4)              | 0.000(3)              | -0.009(4)             | 0.000(3)              |
| C10 | 0.028(5)              | 0.010(4)              | 0.015(4)              | -0.002(4)             | -0.003(4)             | 0.000(4)              |
| C11 | 0.020(5)              | 0.035(6)              | 0.014(5)              | -0.002(4)             | -0.005(3)             | 0.003(4)              |
| C12 | 0.032(5)              | 0.013(4)              | 0.016(4)              | -0.004(3)             | 0.000(4)              | 0.007(4)              |
| C13 | 0.027(5)              | 0.014(4)              | 0.016(4)              | -0.001(4)             | -0.002(4)             | 0.001(4)              |
| C14 | 0.024(5)              | 0.021(5)              | 0.009(4)              | -0.006(3)             | -0.004(3)             | 0.002(4)              |
| C15 | 0.033(6)              | 0.013(4)              | 0.027(5)              | 0.000(4)              | 0.004(4)              | 0.003(4)              |
| C16 | 0.044(7)              | 0.010(4)              | 0.042(5)              | -0.001(4)             | 0.002(5)              | 0.003(4)              |
| C17 | 0.035(6)              | 0.013(5)              | 0.027(5)              | 0.004(4)              | 0.009(4)              | -0.001(4)             |
| C18 | 0.022(5)              | 0.014(4)              | 0.016(4)              | 0.000(3)              | -0.005(3)             | 0.005(4)              |
| C19 | 0.027(5)              | 0.013(4)              | 0.012(4)              | 0.000(3)              | -0.004(4)             | 0.000(4)              |
| C20 | 0.035(6)              | 0.018(5)              | 0.019(4)              | 0.005(4)              | 0.004(4)              | -0.003(4)             |
| C21 | 0.019(5)              | 0.030(5)              | 0.021(4)              | 0.003(4)              | 0.003(4)              | -0.010(4)             |
| C22 | 0.016(4)              | 0.015(4)              | 0.014(4)              | 0.001(3)              | -0.003(3)             | 0.000(3)              |
| C23 | 0.019(5)              | 0.022(5)              | 0.015(4)              | -0.002(4)             | -0.006(3)             | -0.003(4)             |
| C24 | 0.028(5)              | 0.031(6)              | 0.015(4)              | 0.005(4)              | -0.002(4)             | -0.010(4)             |
| C25 | 0.030(6)              | 0.036(6)              | 0.023(5)              | 0.001(5)              | -0.015(4)             | -0.009(4)             |

|     | <b>U<sub>11</sub></b> | <b>U<sub>22</sub></b> | <b>U<sub>33</sub></b> | <b>U<sub>23</sub></b> | <b>U<sub>13</sub></b> | <b>U<sub>12</sub></b> |
|-----|-----------------------|-----------------------|-----------------------|-----------------------|-----------------------|-----------------------|
| C26 | 0.037(6)              | 0.041(7)              | 0.024(5)              | -0.003(5)             | -0.014(4)             | 0.004(5)              |
| C27 | 0.028(6)              | 0.035(6)              | 0.044(7)              | 0.016(5)              | -0.009(5)             | 0.004(5)              |
| C28 | 0.014(4)              | 0.023(5)              | 0.016(5)              | 0.010(4)              | -0.004(3)             | -0.001(4)             |
| C29 | 0.007(4)              | 0.020(5)              | 0.030(5)              | 0.007(4)              | 0.002(3)              | 0.003(4)              |
| C30 | 0.008(4)              | 0.023(5)              | 0.043(6)              | 0.010(4)              | 0.001(4)              | -0.006(4)             |
| C31 | 0.019(4)              | 0.007(4)              | 0.063(7)              | 0.006(5)              | 0.010(4)              | -0.003(4)             |
| C32 | 0.020(5)              | 0.014(5)              | 0.042(6)              | -0.012(4)             | 0.010(4)              | -0.005(4)             |
| C33 | 0.011(4)              | 0.010(4)              | 0.030(5)              | -0.012(4)             | 0.004(4)              | 0.001(3)              |
| C34 | 0.014(5)              | 0.015(5)              | 0.025(5)              | -0.006(4)             | -0.002(4)             | 0.003(4)              |
| C35 | 0.025(5)              | 0.028(5)              | 0.019(5)              | -0.014(4)             | -0.003(4)             | 0.000(4)              |
| C36 | 0.030(6)              | 0.042(7)              | 0.024(5)              | -0.016(5)             | -0.008(4)             | 0.003(5)              |
| C37 | 0.022(5)              | 0.052(7)              | 0.020(5)              | 0.002(5)              | -0.005(4)             | 0.016(5)              |
| C38 | 0.022(5)              | 0.018(5)              | 0.023(5)              | -0.001(4)             | -0.006(4)             | 0.006(4)              |
| O90 | 0.032(4)              | 0.108(7)              | 0.046(5)              | -0.027(4)             | -0.003(5)             | -0.012(5)             |
| O91 | 0.034(4)              | 0.025(4)              | 0.036(4)              | 0.006(3)              | 0.005(3)              | 0.002(3)              |

**Table S24.** Hydrogen atomic coordinates and isotropic atomic displacement parameters ( $\text{\AA}^2$ ) for  $[\text{Co}(\text{terpy})_2](\text{H}_3\text{O})[\text{Mo}_5\text{O}_{15}(1,4\text{-O}_3\text{PC}_8\text{H}_8\text{PO}_3)] \cdot \text{H}_2\text{O} (\mathbf{3} \cdot \text{H}_2\text{O})$ .

|     | <b>x/a</b> | <b>y/b</b> | <b>z/c</b> | <b>U(eq)</b> |
|-----|------------|------------|------------|--------------|
| H1A | 0.7068     | 0.1101     | 0.4603     | 0.024        |
| H1B | 0.7707     | 0.1002     | 0.4168     | 0.024        |
| H3  | 0.8016     | 0.1883     | 0.2197     | 0.025        |
| H4  | 0.6852     | 0.2153     | 0.5122     | 0.025        |
| H5  | 0.8162     | 0.2959     | 0.2044     | 0.024        |
| H6  | 0.6961     | 0.3237     | 0.4984     | 0.022        |
| H8A | 0.7300     | 0.4124     | 0.3017     | 0.021        |
| H8B | 0.7938     | 0.4013     | 0.2599     | 0.021        |
| H9  | 0.4037     | 0.1885     | 0.4990     | 0.02         |
| H10 | 0.3237     | 0.2096     | 0.6301     | 0.021        |
| H11 | 0.2986     | 0.3153     | 0.6748     | 0.027        |
| H12 | 0.3548     | 0.3951     | 0.5865     | 0.024        |
| H15 | 0.4172     | 0.4722     | 0.4682     | 0.029        |
| H16 | 0.4862     | 0.5281     | 0.3484     | 0.038        |
| H17 | 0.5615     | 0.4766     | 0.2387     | 0.03         |
| H20 | 0.6312     | 0.4046     | 0.1332     | 0.028        |
| H21 | 0.6916     | 0.3253     | 0.0425     | 0.028        |
| H22 | 0.5949     | 0.1953     | 0.2294     | 0.018        |
| H23 | 0.6737     | 0.2204     | 0.0919     | 0.022        |

|      | <b>x/a</b> | <b>y/b</b> | <b>z/c</b> | <b>U(eq)</b> |
|------|------------|------------|------------|--------------|
| H24  | 0.5570     | 0.3483     | 0.5795     | 0.029        |
| H25  | 0.6076     | 0.3273     | 0.7787     | 0.035        |
| H26  | 0.6205     | 0.2230     | 0.8482     | 0.041        |
| H27  | 0.5843     | 0.1420     | 0.7132     | 0.043        |
| H30  | 0.5412     | 0.0662     | 0.5558     | 0.03         |
| H31  | 0.5008     | 0.0086     | 0.3788     | 0.036        |
| H32  | 0.4559     | 0.0584     | 0.1965     | 0.031        |
| H35  | 0.4170     | 0.1290     | 0.0189     | 0.029        |
| H36  | 0.3762     | 0.2055     | -0.1202    | 0.038        |
| H37  | 0.3883     | 0.3117     | -0.0684    | 0.037        |
| H38  | 0.4368     | 0.3406     | 0.1313     | 0.025        |
| H90A | 0.6269     | 0.0011     | 0.5519     | 0.093        |
| H90B | 0.6829     | 0.0131     | 0.5969     | 0.093        |

**Table S25.** Sample and crystal data for [Co(2,2'-bpy)<sub>3</sub>](H<sub>3</sub>O)[Mo<sub>5</sub>O<sub>15</sub>(1,4-O<sub>3</sub>PC<sub>8</sub>H<sub>8</sub>O<sub>3</sub>P)] · 6H<sub>2</sub>O (4·6H<sub>2</sub>O).

|                        |                                                                                                                                                                          |         |
|------------------------|--------------------------------------------------------------------------------------------------------------------------------------------------------------------------|---------|
| Identification code    | [Co(2,2'-bpy) <sub>3</sub> ](H <sub>3</sub> O)[Mo <sub>5</sub> O <sub>15</sub> (1,4-O <sub>3</sub> PC <sub>8</sub> H <sub>8</sub> O <sub>3</sub> P)] · 6H <sub>2</sub> O |         |
| Chemical formula       | C <sub>38</sub> H <sub>47</sub> CoMo <sub>5</sub> N <sub>6</sub> O <sub>28</sub> P <sub>2</sub>                                                                          |         |
| Formula weight         | 1636.38                                                                                                                                                                  |         |
| Temperature            | 90(2) K                                                                                                                                                                  |         |
| Wavelength             | 0.71073 Å                                                                                                                                                                |         |
| Crystal system         | Orthorhombic                                                                                                                                                             |         |
| Space group            | P 21 21 21                                                                                                                                                               |         |
| Unit cell dimensions   | a = 14.574(3) Å                                                                                                                                                          | α = 90° |
|                        | b = 17.358(3) Å                                                                                                                                                          | β = 90° |
|                        | c = 20.413(4) Å                                                                                                                                                          | γ = 90° |
| Volume                 | 5164.0(16) Å <sup>3</sup>                                                                                                                                                |         |
| Z                      | 4                                                                                                                                                                        |         |
| Density (calculated)   | 2.105 g/cm <sup>3</sup>                                                                                                                                                  |         |
| Absorption coefficient | 1.652 mm <sup>-1</sup>                                                                                                                                                   |         |
| F(000)                 | 3232                                                                                                                                                                     |         |



**Table S26.** Data collection and structure refinement for [Co(2,2'-bpy)<sub>3</sub>]  
(H<sub>3</sub>O)[Mo<sub>5</sub>O<sub>15</sub>(1,4-O<sub>3</sub>PC<sub>8</sub>H<sub>8</sub>O<sub>3</sub>P)] · 6H<sub>2</sub>O (4·6H<sub>2</sub>O).

|                                   |                                                                   |                           |
|-----------------------------------|-------------------------------------------------------------------|---------------------------|
| Theta range for data collection   | 1.72 to 25.68°                                                    |                           |
| Index ranges                      | -17<=h<=17, -21<=k<=21, -24<=l<=24                                |                           |
| Reflections collected             | 54251                                                             |                           |
| Independent reflections           | 9786 [R(int) = 0.0895]                                            |                           |
| Refinement method                 | Full-matrix least-squares on F <sup>2</sup>                       |                           |
| Refinement program                | SHELXL-2013 (Sheldrick, 2013)                                     |                           |
| Function minimized                | $\Sigma w(F_o^2 - F_c^2)^2$                                       |                           |
| Data / restraints / parameters    | 9786 / 273 / 757                                                  |                           |
| Goodness-of-fit on F <sup>2</sup> | 0.973                                                             |                           |
| $\Delta/\sigma_{\max}$            | 0.001                                                             |                           |
| Final R indices                   | 8527 data; I>2σ(I)                                                | R1 = 0.0377, wR2 = 0.0735 |
|                                   | all data                                                          | R1 = 0.0478, wR2 = 0.0766 |
| Weighting scheme                  | $w=1/[\sigma^2(F_o^2)+(0.0390P)^2]$<br>where $P=(F_o^2+2F_c^2)/3$ |                           |
| Absolute structure parameter      | 0.5(0)                                                            |                           |
| Largest diff. peak and hole       | 1.219 and -0.700 eÅ <sup>-3</sup>                                 |                           |
| R.M.S. deviation from mean        | 0.121 eÅ <sup>-3</sup>                                            |                           |

**Table S27.** Atomic coordinates and equivalent isotropic atomic displacement parameters ( $\text{\AA}^2$ ) for  $[\text{Co}(2,2'\text{-bpy})_3](\text{H}_3\text{O})[\text{Mo}_5\text{O}_{15}(1,4\text{-O}_3\text{PC}_8\text{H}_8\text{O}_3\text{P})] \cdot 6\text{H}_2\text{O}$  (**4·6H<sub>2</sub>O**).

$U(\text{eq})$  is defined as one third of the trace of the orthogonalized  $U_{ij}$  tensor.

|     | <b>x/a</b>  | <b>y/b</b>  | <b>z/c</b>  | <b>U(eq)</b> |
|-----|-------------|-------------|-------------|--------------|
| Mo1 | 0.46730(5)  | 0.05527(4)  | 0.04360(3)  | 0.00945(17)  |
| Mo2 | 0.41800(5)  | 0.20117(4)  | 0.14679(4)  | 0.01001(17)  |
| Mo3 | 0.22436(5)  | 0.16188(4)  | 0.22870(4)  | 0.00943(17)  |
| Mo4 | 0.12277(5)  | 0.99822(4)  | 0.15184(3)  | 0.00906(16)  |
| Mo5 | 0.31402(5)  | 0.91297(4)  | 0.06053(4)  | 0.00916(17)  |
| Co1 | 0.77506(8)  | 0.91804(7)  | 0.89269(5)  | 0.0082(2)    |
| P1  | 0.36256(15) | 0.01276(13) | 0.19342(10) | 0.0085(5)    |
| P2  | 0.25662(15) | 0.88578(12) | 0.56068(11) | 0.0085(5)    |
| O1  | 0.4377(4)   | 0.9494(3)   | 0.0505(3)   | 0.0112(12)   |
| O2  | 0.4729(4)   | 0.0668(3)   | 0.9604(3)   | 0.0146(13)   |
| O3  | 0.5791(4)   | 0.0493(3)   | 0.0668(3)   | 0.0153(13)   |
| O4  | 0.4447(4)   | 0.1638(3)   | 0.0616(3)   | 0.0095(12)   |
| O5  | 0.4252(4)   | 0.0667(3)   | 0.1541(3)   | 0.0090(12)   |
| O6  | 0.5239(4)   | 0.2070(4)   | 0.1821(3)   | 0.0158(14)   |
| O7  | 0.3912(4)   | 0.2943(3)   | 0.1296(3)   | 0.0154(14)   |
| O8  | 0.3485(4)   | 0.1861(3)   | 0.2280(3)   | 0.0116(13)   |
| O9  | 0.1708(4)   | 0.2490(3)   | 0.2193(3)   | 0.0169(14)   |
| O10 | 0.2135(4)   | 0.1435(3)   | 0.3095(3)   | 0.0161(14)   |

|      | <b>x/a</b> | <b>y/b</b> | <b>z/c</b> | <b>U(eq)</b> |
|------|------------|------------|------------|--------------|
| O11  | 0.1088(4)  | 0.1042(3)  | 0.1960(3)  | 0.0097(12)   |
| O12  | 0.2645(4)  | 0.0469(3)  | 0.1997(3)  | 0.0087(12)   |
| O13  | 0.0149(4)  | 0.9870(3)  | 0.1215(3)  | 0.0151(14)   |
| O14  | 0.1152(4)  | 0.9495(3)  | 0.2247(3)  | 0.0118(12)   |
| O15  | 0.1936(4)  | 0.9305(3)  | 0.1018(3)  | 0.0104(12)   |
| O16  | 0.3561(4)  | 0.9337(3)  | 0.1638(3)  | 0.0111(13)   |
| O17  | 0.3348(4)  | 0.8179(3)  | 0.0735(3)  | 0.0145(14)   |
| O18  | 0.2793(4)  | 0.9135(3)  | 0.9809(3)  | 0.0139(13)   |
| O19  | 0.1854(4)  | 0.9502(3)  | 0.5503(3)  | 0.0092(12)   |
| O20  | 0.2295(4)  | 0.8317(3)  | 0.6175(3)  | 0.0096(12)   |
| O21  | 0.3497(4)  | 0.9216(3)  | 0.5725(3)  | 0.0085(12)   |
| O90  | 0.4835(5)  | 0.8130(4)  | 0.1982(3)  | 0.0220(16)   |
| O91  | 0.9524(6)  | 0.3041(5)  | 0.4367(4)  | 0.048(2)     |
| O92  | 0.9587(6)  | 0.3605(4)  | 0.1703(3)  | 0.0353(19)   |
| O93  | 0.9836(5)  | 0.1968(4)  | 0.1491(3)  | 0.0246(16)   |
| O94  | 0.0421(7)  | 0.2577(5)  | 0.0356(4)  | 0.043(2)     |
| O95A | 0.1656(16) | 0.3304(14) | 0.1059(11) | 0.024(8)     |
| O95B | 0.1340(9)  | 0.3612(8)  | 0.1265(6)  | 0.028(4)     |
| O96  | 0.0390(10) | 0.3169(7)  | 0.3104(5)  | 0.095(4)     |
| N1   | 0.6430(5)  | 0.9270(4)  | 0.8920(3)  | 0.0082(14)   |
| N2   | 0.7539(5)  | 0.8567(4)  | 0.9701(3)  | 0.0095(15)   |

|     | <b>x/a</b> | <b>y/b</b> | <b>z/c</b> | <b>U(eq)</b> |
|-----|------------|------------|------------|--------------|
| N3  | 0.8000(5)  | 0.0024(4)  | 0.9513(3)  | 0.0104(14)   |
| N4  | 0.9051(5)  | 0.9031(4)  | 0.8980(3)  | 0.0113(15)   |
| N5  | 0.7967(5)  | 0.9797(4)  | 0.8151(3)  | 0.0084(15)   |
| N6  | 0.7574(5)  | 0.8375(4)  | 0.8295(3)  | 0.0090(15)   |
| C1  | 0.5921(6)  | 0.9562(5)  | 0.8440(4)  | 0.0110(18)   |
| C2  | 0.4983(6)  | 0.9451(5)  | 0.8413(4)  | 0.0160(19)   |
| C3  | 0.4555(6)  | 0.9016(5)  | 0.8899(4)  | 0.0136(19)   |
| C4  | 0.5073(6)  | 0.8721(5)  | 0.9399(4)  | 0.0128(19)   |
| C5  | 0.6017(6)  | 0.8862(4)  | 0.9400(4)  | 0.0083(17)   |
| C6  | 0.6644(6)  | 0.8539(5)  | 0.9897(4)  | 0.0108(18)   |
| C7  | 0.6379(6)  | 0.8262(5)  | 0.0493(4)  | 0.0136(19)   |
| C8  | 0.7050(7)  | 0.7973(5)  | 0.0910(4)  | 0.020(2)     |
| C9  | 0.7959(6)  | 0.7953(5)  | 0.0704(4)  | 0.019(2)     |
| C10 | 0.8164(6)  | 0.8259(5)  | 0.0102(4)  | 0.0125(18)   |
| C11 | 0.7383(6)  | 0.0499(5)  | 0.9767(4)  | 0.0109(18)   |
| C12 | 0.7621(7)  | 0.1094(5)  | 0.0176(4)  | 0.018(2)     |
| C13 | 0.8537(6)  | 0.1224(5)  | 0.0312(4)  | 0.017(2)     |
| C14 | 0.9189(7)  | 0.0726(5)  | 0.0053(4)  | 0.0144(19)   |
| C15 | 0.8907(6)  | 0.0133(5)  | 0.9656(4)  | 0.0124(18)   |
| C16 | 0.9505(6)  | 0.9546(5)  | 0.9369(4)  | 0.0106(17)   |
| C17 | 0.0448(6)  | 0.9484(5)  | 0.9470(4)  | 0.0147(19)   |

|     | <b>x/a</b> | <b>y/b</b> | <b>z/c</b> | <b>U(eq)</b> |
|-----|------------|------------|------------|--------------|
| C18 | 0.0919(6)  | 0.8908(5)  | 0.9170(4)  | 0.018(2)     |
| C19 | 0.0448(6)  | 0.8387(6)  | 0.8771(4)  | 0.018(2)     |
| C20 | 0.9524(6)  | 0.8460(5)  | 0.8692(4)  | 0.0143(19)   |
| C21 | 0.8124(6)  | 0.0556(5)  | 0.8127(4)  | 0.0126(18)   |
| C22 | 0.8412(6)  | 0.0905(5)  | 0.7553(4)  | 0.016(2)     |
| C23 | 0.8568(6)  | 0.0476(5)  | 0.7006(4)  | 0.015(2)     |
| C24 | 0.8386(6)  | 0.9692(5)  | 0.7030(4)  | 0.016(2)     |
| C25 | 0.8074(6)  | 0.9372(5)  | 0.7598(4)  | 0.0097(17)   |
| C26 | 0.7806(6)  | 0.8561(5)  | 0.7678(4)  | 0.0097(17)   |
| C27 | 0.7756(6)  | 0.8039(5)  | 0.7168(4)  | 0.0132(18)   |
| C28 | 0.7445(6)  | 0.7309(5)  | 0.7302(5)  | 0.017(2)     |
| C29 | 0.7166(6)  | 0.7123(5)  | 0.7919(4)  | 0.0147(19)   |
| C30 | 0.7235(6)  | 0.7665(5)  | 0.8410(4)  | 0.0144(19)   |
| C31 | 0.4139(6)  | 0.0063(5)  | 0.2731(4)  | 0.0115(17)   |
| C32 | 0.3697(6)  | 0.9547(5)  | 0.3235(4)  | 0.0097(17)   |
| C33 | 0.2821(6)  | 0.9696(5)  | 0.3470(4)  | 0.0109(17)   |
| C34 | 0.4182(6)  | 0.8953(5)  | 0.3525(4)  | 0.0106(17)   |
| C35 | 0.2460(6)  | 0.9281(5)  | 0.3988(4)  | 0.0121(19)   |
| C36 | 0.3834(6)  | 0.8537(5)  | 0.4044(4)  | 0.0108(18)   |
| C37 | 0.2963(6)  | 0.8703(5)  | 0.4291(4)  | 0.0120(18)   |
| C38 | 0.2599(6)  | 0.8280(5)  | 0.4882(4)  | 0.0115(18)   |

**Table S28.** Bond lengths (Å) for [Co(2,2'-bpy)<sub>3</sub>](H<sub>3</sub>O)[Mo<sub>5</sub>O<sub>15</sub>(1,4-O<sub>3</sub>PC<sub>8</sub>H<sub>8</sub>O<sub>3</sub>P)] · 6H<sub>2</sub>O (4·6H<sub>2</sub>O).

|         |          |         |          |
|---------|----------|---------|----------|
| Mo1-O3  | 1.700(6) | Mo1-O2  | 1.712(6) |
| Mo1-O1  | 1.893(6) | Mo1-O4  | 1.947(6) |
| Mo1-O19 | 2.231(6) | Mo1-O5  | 2.346(5) |
| Mo2-O7  | 1.699(6) | Mo2-O6  | 1.706(6) |
| Mo2-O4  | 1.897(5) | Mo2-O8  | 1.961(6) |
| Mo2-O20 | 2.303(6) | Mo2-O5  | 2.341(5) |
| Mo3-O10 | 1.688(6) | Mo3-O9  | 1.712(6) |
| Mo3-O8  | 1.857(6) | Mo3-O11 | 2.070(6) |
| Mo3-O12 | 2.163(6) | Mo3-O20 | 2.370(5) |
| Mo4-O13 | 1.701(6) | Mo4-O14 | 1.715(6) |
| Mo4-O15 | 1.868(6) | Mo4-O11 | 2.059(5) |
| Mo4-O21 | 2.173(5) | Mo4-O12 | 2.436(6) |
| Mo5-O17 | 1.698(6) | Mo5-O18 | 1.702(6) |
| Mo5-O1  | 1.922(6) | Mo5-O15 | 1.970(6) |
| Mo5-O16 | 2.225(6) | Mo5-O19 | 2.384(5) |
| Co1-N4  | 1.916(7) | Co1-N6  | 1.921(7) |
| Co1-N3  | 1.926(7) | Co1-N2  | 1.931(7) |
| Co1-N1  | 1.931(7) | Co1-N5  | 1.937(7) |
| P1-O16  | 1.503(6) | P1-O5   | 1.535(6) |

|          |           |          |           |
|----------|-----------|----------|-----------|
| P1-O12   | 1.552(6)  | P1-C31   | 1.793(8)  |
| P2-O21   | 1.511(6)  | P2-O19   | 1.540(6)  |
| P2-O20   | 1.544(6)  | P2-C38   | 1.788(8)  |
| O19-Mo1  | 2.232(6)  | O19-Mo5  | 2.384(5)  |
| O20-Mo2  | 2.303(6)  | O20-Mo3  | 2.370(5)  |
| O21-Mo4  | 2.173(5)  | O90-H90A | 0.84(3)   |
| O90-H90B | 0.84(3)   | O91-H91A | 0.86(3)   |
| O91-H91B | 0.86(3)   | O92-H92A | 0.84(3)   |
| O92-H92B | 0.85(3)   | O93-H93A | 0.82(3)   |
| O93-H93B | 0.84(3)   | O94-H94A | 0.82(3)   |
| O94-H94B | 0.84(3)   | O96-H96A | 0.85(3)   |
| O96-H96B | 0.85(3)   | N1-C1    | 1.330(11) |
| N1-C5    | 1.351(10) | N2-C10   | 1.335(11) |
| N2-C6    | 1.365(11) | N3-C11   | 1.325(11) |
| N3-C15   | 1.366(11) | N4-C20   | 1.343(11) |
| N4-C16   | 1.367(11) | N5-C21   | 1.339(10) |
| N5-C25   | 1.358(10) | N6-C26   | 1.343(11) |
| N6-C30   | 1.347(10) | C1-C2    | 1.381(12) |
| C1-H1    | 0.93      | C2-C3    | 1.394(12) |
| C2-H2    | 0.93      | C3-C4    | 1.369(12) |
| C3-H3    | 0.93      | C4-C5    | 1.396(11) |
| C4-H4    | 0.93      | C5-C6    | 1.475(11) |

|         |           |          |           |
|---------|-----------|----------|-----------|
| C6-C7   | 1.364(12) | C7-C8    | 1.391(12) |
| C7-H7   | 0.93      | C8-C9    | 1.391(13) |
| C8-H8   | 0.93      | C9-C10   | 1.372(12) |
| C9-H9   | 0.93      | C10-H10  | 0.93      |
| C11-C12 | 1.372(12) | C11-H11  | 0.93      |
| C12-C13 | 1.383(13) | C12-H12  | 0.93      |
| C13-C14 | 1.388(13) | C13-H13  | 0.93      |
| C14-C15 | 1.374(12) | C14-H14  | 0.93      |
| C15-C16 | 1.463(12) | C16-C17  | 1.393(12) |
| C17-C18 | 1.359(13) | C17-H17  | 0.93      |
| C18-C19 | 1.397(13) | C18-H18  | 0.93      |
| C19-C20 | 1.362(12) | C19-H19  | 0.93      |
| C20-H20 | 0.93      | C21-C22  | 1.383(12) |
| C21-H21 | 0.93      | C22-C23  | 1.361(12) |
| C22-H22 | 0.93      | C23-C24  | 1.387(12) |
| C23-H23 | 0.93      | C24-C25  | 1.364(12) |
| C24-H24 | 0.93      | C25-C26  | 1.470(11) |
| C26-C27 | 1.381(11) | C27-C28  | 1.373(12) |
| C27-H27 | 0.93      | C28-C29  | 1.363(12) |
| C28-H28 | 0.93      | C29-C30  | 1.378(12) |
| C29-H29 | 0.93      | C30-H30  | 0.93      |
| C31-C32 | 1.510(11) | C31-H31A | 0.97      |



|          |           |          |           |
|----------|-----------|----------|-----------|
| C31-H31B | 0.97      | C32-C34  | 1.382(12) |
| C32-C33  | 1.387(11) | C33-C35  | 1.384(12) |
| C33-H33  | 0.93      | C34-C36  | 1.379(12) |
| C34-H34  | 0.93      | C35-C37  | 1.387(12) |
| C35-H35  | 0.93      | C36-C37  | 1.395(12) |
| C36-H36  | 0.93      | C37-C38  | 1.510(11) |
| C38-H38A | 0.97      | C38-H38B | 0.97      |

**Table S29.** Bond angles (°) for [Co(2,2'-bpy)<sub>3</sub>](H<sub>3</sub>O)[Mo<sub>5</sub>O<sub>15</sub>(1,4-O<sub>3</sub>PC<sub>8</sub>H<sub>8</sub>O<sub>3</sub>P)] · 6H<sub>2</sub>O (4·6H<sub>2</sub>O).

|             |           |             |           |
|-------------|-----------|-------------|-----------|
| O3-Mo1-O2   | 103.8(3)  | O3-Mo1-O1   | 98.0(3)   |
| O2-Mo1-O1   | 101.4(3)  | O3-Mo1-O4   | 99.7(3)   |
| O2-Mo1-O4   | 94.7(2)   | O1-Mo1-O4   | 152.5(2)  |
| O3-Mo1-O19  | 159.4(2)  | O2-Mo1-O19  | 96.5(3)   |
| O1-Mo1-O19  | 74.2(2)   | O4-Mo1-O19  | 82.0(2)   |
| O3-Mo1-O5   | 89.3(2)   | O2-Mo1-O5   | 163.0(2)  |
| O1-Mo1-O5   | 87.2(2)   | O4-Mo1-O5   | 72.1(2)   |
| O19-Mo1-O5  | 71.56(19) | O7-Mo2-O6   | 103.8(3)  |
| O7-Mo2-O4   | 100.6(3)  | O6-Mo2-O4   | 102.8(3)  |
| O7-Mo2-O8   | 100.5(3)  | O6-Mo2-O8   | 96.8(3)   |
| O4-Mo2-O8   | 146.7(2)  | O7-Mo2-O20  | 88.2(3)   |
| O6-Mo2-O20  | 165.6(2)  | O4-Mo2-O20  | 82.5(2)   |
| O8-Mo2-O20  | 72.8(2)   | O7-Mo2-O5   | 166.3(3)  |
| O6-Mo2-O5   | 89.5(3)   | O4-Mo2-O5   | 73.0(2)   |
| O8-Mo2-O5   | 80.6(2)   | O20-Mo2-O5  | 79.13(19) |
| O10-Mo3-O9  | 103.5(3)  | O10-Mo3-O8  | 98.1(3)   |
| O9-Mo3-O8   | 104.1(3)  | O10-Mo3-O11 | 98.5(3)   |
| O9-Mo3-O11  | 91.2(3)   | O8-Mo3-O11  | 154.1(2)  |
| O10-Mo3-O12 | 96.8(2)   | O9-Mo3-O12  | 155.2(3)  |
| O8-Mo3-O12  | 86.8(2)   | O11-Mo3-O12 | 71.7(2)   |

|             |           |             |           |
|-------------|-----------|-------------|-----------|
| O10-Mo3-O20 | 166.4(3)  | O9-Mo3-O20  | 88.9(2)   |
| O8-Mo3-O20  | 72.9(2)   | O11-Mo3-O20 | 86.8(2)   |
| O12-Mo3-O20 | 72.8(2)   | O13-Mo4-O14 | 101.6(3)  |
| O13-Mo4-O15 | 103.9(3)  | O14-Mo4-O15 | 101.5(3)  |
| O13-Mo4-O11 | 99.8(3)   | O14-Mo4-O11 | 93.1(2)   |
| O15-Mo4-O11 | 148.9(2)  | O13-Mo4-O21 | 88.4(2)   |
| O14-Mo4-O21 | 167.0(2)  | O15-Mo4-O21 | 83.9(2)   |
| O11-Mo4-O21 | 76.8(2)   | O13-Mo4-O12 | 165.8(2)  |
| O14-Mo4-O12 | 82.9(2)   | O15-Mo4-O12 | 88.2(2)   |
| O11-Mo4-O12 | 66.3(2)   | O21-Mo4-O12 | 85.42(19) |
| O17-Mo5-O18 | 101.9(3)  | O17-Mo5-O1  | 99.7(3)   |
| O18-Mo5-O1  | 100.1(3)  | O17-Mo5-O15 | 104.0(3)  |
| O18-Mo5-O15 | 98.2(3)   | O1-Mo5-O15  | 146.1(2)  |
| O17-Mo5-O16 | 87.7(2)   | O18-Mo5-O16 | 170.3(3)  |
| O1-Mo5-O16  | 77.8(2)   | O15-Mo5-O16 | 79.3(2)   |
| O17-Mo5-O19 | 168.8(3)  | O18-Mo5-O19 | 85.0(2)   |
| O1-Mo5-O19  | 70.1(2)   | O15-Mo5-O19 | 83.5(2)   |
| O16-Mo5-O19 | 85.46(19) | N4-Co1-N6   | 94.1(3)   |
| N4-Co1-N3   | 83.2(3)   | N6-Co1-N3   | 175.3(3)  |
| N4-Co1-N2   | 92.1(3)   | N6-Co1-N2   | 97.3(3)   |
| N3-Co1-N2   | 86.6(3)   | N4-Co1-N1   | 175.7(3)  |
| N6-Co1-N1   | 85.4(3)   | N3-Co1-N1   | 97.6(3)   |

|               |           |               |           |
|---------------|-----------|---------------|-----------|
| N2-Co1-N1     | 83.7(3)   | N4-Co1-N5     | 87.7(3)   |
| N6-Co1-N5     | 82.8(3)   | N3-Co1-N5     | 93.3(3)   |
| N2-Co1-N5     | 179.8(3)  | N1-Co1-N5     | 96.5(3)   |
| O16-P1-O5     | 112.6(3)  | O16-P1-O12    | 108.9(3)  |
| O5-P1-O12     | 111.0(3)  | O16-P1-C31    | 109.5(4)  |
| O5-P1-C31     | 105.3(4)  | O12-P1-C31    | 109.5(4)  |
| O21-P2-O19    | 109.2(3)  | O21-P2-O20    | 111.1(3)  |
| O19-P2-O20    | 111.8(3)  | O21-P2-C38    | 109.8(4)  |
| O19-P2-C38    | 108.1(4)  | O20-P2-C38    | 106.7(4)  |
| Mo1-O1-Mo5    | 122.8(3)  | Mo2-O4-Mo1    | 122.6(3)  |
| P1-O5-Mo2     | 128.0(3)  | P1-O5-Mo1     | 127.4(3)  |
| Mo2-O5-Mo1    | 92.01(19) | Mo3-O8-Mo2    | 122.7(3)  |
| Mo4-O11-Mo3   | 119.5(3)  | P1-O12-Mo3    | 128.6(3)  |
| P1-O12-Mo4    | 128.0(3)  | Mo3-O12-Mo4   | 101.6(2)  |
| Mo4-O15-Mo5   | 145.4(3)  | P1-O16-Mo5    | 123.1(3)  |
| P2-O19-Mo1    | 130.5(3)  | P2-O19-Mo5    | 135.1(3)  |
| Mo1-O19-Mo5   | 92.9(2)   | P2-O20-Mo2    | 125.8(3)  |
| P2-O20-Mo3    | 128.2(3)  | Mo2-O20-Mo3   | 91.60(19) |
| P2-O21-Mo4    | 123.2(3)  | H90A-O90-H90B | 105.(6)   |
| H91A-O91-H91B | 108.(7)   | H92A-O92-H92B | 105.(6)   |
| H93A-O93-H93B | 110.(6)   | H94A-O94-H94B | 117.(7)   |
| H96A-O96-H96B | 106.(7)   | C1-N1-C5      | 119.1(7)  |

|            |          |            |          |
|------------|----------|------------|----------|
| C1-N1-Co1  | 126.3(6) | C5-N1-Co1  | 113.4(5) |
| C10-N2-C6  | 117.4(7) | C10-N2-Co1 | 127.8(6) |
| C6-N2-Co1  | 114.3(6) | C11-N3-C15 | 119.1(7) |
| C11-N3-Co1 | 126.0(6) | C15-N3-Co1 | 114.9(6) |
| C20-N4-C16 | 119.2(7) | C20-N4-Co1 | 125.7(6) |
| C16-N4-Co1 | 115.1(6) | C21-N5-C25 | 119.0(7) |
| C21-N5-Co1 | 127.0(6) | C25-N5-Co1 | 113.5(5) |
| C26-N6-C30 | 118.5(7) | C26-N6-Co1 | 114.9(5) |
| C30-N6-Co1 | 126.6(6) | N1-C1-C2   | 121.8(8) |
| N1-C1-H1   | 119.1    | C2-C1-H1   | 119.1    |
| C1-C2-C3   | 119.4(8) | C1-C2-H2   | 120.3    |
| C3-C2-H2   | 120.3    | C4-C3-C2   | 119.1(8) |
| C4-C3-H3   | 120.5    | C2-C3-H3   | 120.5    |
| C3-C4-C5   | 118.7(8) | C3-C4-H4   | 120.7    |
| C5-C4-H4   | 120.7    | N1-C5-C4   | 121.9(8) |
| N1-C5-C6   | 114.9(7) | C4-C5-C6   | 123.0(8) |
| C7-C6-N2   | 122.9(8) | C7-C6-C5   | 124.9(8) |
| N2-C6-C5   | 112.2(7) | C6-C7-C8   | 118.4(8) |
| C6-C7-H7   | 120.8    | C8-C7-H7   | 120.8    |
| C9-C8-C7   | 119.5(8) | C9-C8-H8   | 120.2    |
| C7-C8-H8   | 120.2    | C10-C9-C8  | 118.0(9) |
| C10-C9-H9  | 121.0    | C8-C9-H9   | 121.0    |

|             |          |             |          |
|-------------|----------|-------------|----------|
| N2-C10-C9   | 123.7(9) | N2-C10-H10  | 118.2    |
| C9-C10-H10  | 118.2    | N3-C11-C12  | 122.4(8) |
| N3-C11-H11  | 118.8    | C12-C11-H11 | 118.8    |
| C11-C12-C13 | 119.3(9) | C11-C12-H12 | 120.4    |
| C13-C12-H12 | 120.4    | C12-C13-C14 | 118.8(8) |
| C12-C13-H13 | 120.6    | C14-C13-H13 | 120.6    |
| C15-C14-C13 | 119.1(9) | C15-C14-H14 | 120.4    |
| C13-C14-H14 | 120.4    | N3-C15-C14  | 121.3(8) |
| N3-C15-C16  | 113.3(7) | C14-C15-C16 | 125.4(8) |
| N4-C16-C17  | 120.9(8) | N4-C16-C15  | 113.5(7) |
| C17-C16-C15 | 125.6(8) | C18-C17-C16 | 119.2(8) |
| C18-C17-H17 | 120.4    | C16-C17-H17 | 120.4    |
| C17-C18-C19 | 119.4(9) | C17-C18-H18 | 120.3    |
| C19-C18-H18 | 120.3    | C20-C19-C18 | 119.6(9) |
| C20-C19-H19 | 120.2    | C18-C19-H19 | 120.2    |
| N4-C20-C19  | 121.6(9) | N4-C20-H20  | 119.2    |
| C19-C20-H20 | 119.2    | N5-C21-C22  | 120.9(8) |
| N5-C21-H21  | 119.5    | C22-C21-H21 | 119.5    |
| C23-C22-C21 | 120.4(9) | C23-C22-H22 | 119.8    |
| C21-C22-H22 | 119.8    | C22-C23-C24 | 118.5(9) |
| C22-C23-H23 | 120.8    | C24-C23-H23 | 120.8    |
| C25-C24-C23 | 119.5(9) | C25-C24-H24 | 120.3    |

|               |          |             |          |
|---------------|----------|-------------|----------|
| C23-C24-H24   | 120.3    | N5-C25-C24  | 121.6(8) |
| N5-C25-C26    | 113.4(7) | C24-C25-C26 | 125.0(8) |
| N6-C26-C27    | 122.3(8) | N6-C26-C25  | 113.7(7) |
| C27-C26-C25   | 123.9(8) | C28-C27-C26 | 118.2(8) |
| C28-C27-H27   | 120.9    | C26-C27-H27 | 120.9    |
| C29-C28-C27   | 120.0(8) | C29-C28-H28 | 120.0    |
| C27-C28-H28   | 120.0    | C28-C29-C30 | 119.3(8) |
| C28-C29-H29   | 120.4    | C30-C29-H29 | 120.4    |
| N6-C30-C29    | 121.5(8) | N6-C30-H30  | 119.2    |
| C29-C30-H30   | 119.2    | C32-C31-P1  | 118.5(6) |
| C32-C31-H31A  | 107.7    | P1-C31-H31A | 107.7    |
| C32-C31-H31B  | 107.7    | P1-C31-H31B | 107.7    |
| H31A-C31-H31B | 107.1    | C34-C32-C33 | 117.5(8) |
| C34-C32-C31   | 121.1(8) | C33-C32-C31 | 121.2(8) |
| C35-C33-C32   | 121.1(8) | C35-C33-H33 | 119.4    |
| C32-C33-H33   | 119.4    | C36-C34-C32 | 122.1(8) |
| C36-C34-H34   | 119.0    | C32-C34-H34 | 119.0    |
| C33-C35-C37   | 121.0(8) | C33-C35-H35 | 119.5    |
| C37-C35-H35   | 119.5    | C34-C36-C37 | 120.2(8) |
| C34-C36-H36   | 119.9    | C37-C36-H36 | 119.9    |
| C35-C37-C36   | 118.0(8) | C35-C37-C38 | 121.4(8) |
| C36-C37-C38   | 120.6(8) | C37-C38-P2  | 113.5(6) |

|               |       |             |       |
|---------------|-------|-------------|-------|
| C37-C38-H38A  | 108.9 | P2-C38-H38A | 108.9 |
| C37-C38-H38B  | 108.9 | P2-C38-H38B | 108.9 |
| H38A-C38-H38B | 107.7 |             |       |



**Table S30.** Torsion angles (°) for [Co(2,2'-bpy)<sub>3</sub>](H<sub>3</sub>O)[Mo<sub>5</sub>O<sub>15</sub>(1,4-O<sub>3</sub>PC<sub>8</sub>H<sub>8</sub>O<sub>3</sub>P)] · 6H<sub>2</sub>O (4·6H<sub>2</sub>O).

|                 |           |                 |           |
|-----------------|-----------|-----------------|-----------|
| O3-Mo1-O1-Mo5   | 158.4(3)  | O2-Mo1-O1-Mo5   | -95.7(4)  |
| O4-Mo1-O1-Mo5   | 28.9(7)   | O19-Mo1-O1-Mo5  | -2.1(3)   |
| O5-Mo1-O1-Mo5   | 69.5(3)   | O7-Mo2-O4-Mo1   | -172.6(3) |
| O6-Mo2-O4-Mo1   | 80.5(4)   | O8-Mo2-O4-Mo1   | -44.1(6)  |
| O20-Mo2-O4-Mo1  | -85.9(3)  | O5-Mo2-O4-Mo1   | -5.0(3)   |
| O16-P1-O5-Mo2   | 152.5(3)  | O12-P1-O5-Mo2   | 30.2(5)   |
| C31-P1-O5-Mo2   | -88.2(5)  | O16-P1-O5-Mo1   | 21.9(5)   |
| O12-P1-O5-Mo1   | -100.5(4) | C31-P1-O5-Mo1   | 141.1(4)  |
| O10-Mo3-O8-Mo2  | 171.4(4)  | O9-Mo3-O8-Mo2   | -82.4(4)  |
| O11-Mo3-O8-Mo2  | 42.0(7)   | O12-Mo3-O8-Mo2  | 75.0(3)   |
| O20-Mo3-O8-Mo2  | 2.0(3)    | O16-P1-O12-Mo3  | -173.1(4) |
| O5-P1-O12-Mo3   | -48.6(5)  | C31-P1-O12-Mo3  | 67.2(5)   |
| O16-P1-O12-Mo4  | -11.6(5)  | O5-P1-O12-Mo4   | 112.9(4)  |
| C31-P1-O12-Mo4  | -131.3(4) | O13-Mo4-O15-Mo5 | 145.1(5)  |
| O14-Mo4-O15-Mo5 | -109.8(5) | O11-Mo4-O15-Mo5 | 6.6(9)    |
| O21-Mo4-O15-Mo5 | 58.2(5)   | O12-Mo4-O15-Mo5 | -27.3(5)  |
| O5-P1-O16-Mo5   | -55.0(5)  | O12-P1-O16-Mo5  | 68.5(4)   |
| C31-P1-O16-Mo5  | -171.9(4) | O21-P2-O19-Mo1  | -170.8(4) |
| O20-P2-O19-Mo1  | -47.5(5)  | C38-P2-O19-Mo1  | 69.7(5)   |

|                 |           |                 |           |
|-----------------|-----------|-----------------|-----------|
| O21-P2-O19-Mo5  | -8.3(5)   | O20-P2-O19-Mo5  | 115.1(4)  |
| C38-P2-O19-Mo5  | -127.7(5) | O21-P2-O20-Mo2  | 155.3(3)  |
| O19-P2-O20-Mo2  | 33.1(5)   | C38-P2-O20-Mo2  | -85.0(5)  |
| O21-P2-O20-Mo3  | 27.7(5)   | O19-P2-O20-Mo3  | -94.6(4)  |
| C38-P2-O20-Mo3  | 147.3(4)  | O19-P2-O21-Mo4  | 58.0(4)   |
| O20-P2-O21-Mo4  | -65.8(4)  | C38-P2-O21-Mo4  | 176.4(4)  |
| C5-N1-C1-C2     | -1.0(12)  | Co1-N1-C1-C2    | 165.6(6)  |
| N1-C1-C2-C3     | -0.5(13)  | C1-C2-C3-C4     | 1.3(13)   |
| C2-C3-C4-C5     | -0.6(13)  | C1-N1-C5-C4     | 1.7(12)   |
| Co1-N1-C5-C4    | -166.5(6) | C1-N1-C5-C6     | 177.9(7)  |
| Co1-N1-C5-C6    | 9.7(9)    | C3-C4-C5-N1     | -0.9(12)  |
| C3-C4-C5-C6     | -176.8(8) | C10-N2-C6-C7    | 4.6(12)   |
| Co1-N2-C6-C7    | -167.3(7) | C10-N2-C6-C5    | -177.2(7) |
| Co1-N2-C6-C5    | 10.9(9)   | N1-C5-C6-C7     | 164.6(8)  |
| C4-C5-C6-C7     | -19.3(13) | N1-C5-C6-N2     | -13.6(10) |
| C4-C5-C6-N2     | 162.6(8)  | N2-C6-C7-C8     | -2.1(13)  |
| C5-C6-C7-C8     | 179.9(8)  | C6-C7-C8-C9     | -1.9(13)  |
| C7-C8-C9-C10    | 3.3(13)   | C6-N2-C10-C9    | -3.1(12)  |
| Co1-N2-C10-C9   | 167.5(7)  | C8-C9-C10-N2    | -0.7(13)  |
| C15-N3-C11-C12  | -0.5(12)  | Co1-N3-C11-C12  | -179.1(6) |
| N3-C11-C12-C13  | 2.2(13)   | C11-C12-C13-C14 | -2.7(13)  |
| C12-C13-C14-C15 | 1.7(13)   | C11-N3-C15-C14  | -0.5(12)  |

|                 |           |                 |           |
|-----------------|-----------|-----------------|-----------|
| Co1-N3-C15-C14  | 178.2(6)  | C11-N3-C15-C16  | 177.2(7)  |
| Co1-N3-C15-C16  | -4.1(9)   | C13-C14-C15-N3  | -0.1(13)  |
| C13-C14-C15-C16 | -177.5(8) | C20-N4-C16-C17  | -0.1(12)  |
| Co1-N4-C16-C17  | 177.5(6)  | C20-N4-C16-C15  | -179.4(7) |
| Co1-N4-C16-C15  | -1.8(9)   | N3-C15-C16-N4   | 3.8(10)   |
| C14-C15-C16-N4  | -178.6(8) | N3-C15-C16-C17  | -175.4(8) |
| C14-C15-C16-C17 | 2.2(13)   | N4-C16-C17-C18  | 0.8(12)   |
| C15-C16-C17-C18 | -180.0(8) | C16-C17-C18-C19 | -0.5(13)  |
| C17-C18-C19-C20 | -0.5(13)  | C16-N4-C20-C19  | -0.9(12)  |
| Co1-N4-C20-C19  | -178.2(6) | C18-C19-C20-N4  | 1.2(13)   |
| C25-N5-C21-C22  | -1.5(12)  | Co1-N5-C21-C22  | 169.7(6)  |
| N5-C21-C22-C23  | -2.0(13)  | C21-C22-C23-C24 | 3.3(13)   |
| C22-C23-C24-C25 | -1.1(13)  | C21-N5-C25-C24  | 3.8(12)   |
| Co1-N5-C25-C24  | -168.5(7) | C21-N5-C25-C26  | -175.1(7) |
| Co1-N5-C25-C26  | 12.5(9)   | C23-C24-C25-N5  | -2.5(13)  |
| C23-C24-C25-C26 | 176.3(8)  | C30-N6-C26-C27  | -3.6(12)  |
| Co1-N6-C26-C27  | 177.3(7)  | C30-N6-C26-C25  | 173.9(7)  |
| Co1-N6-C26-C25  | -5.2(9)   | N5-C25-C26-N6   | -4.9(10)  |
| C24-C25-C26-N6  | 176.1(8)  | N5-C25-C26-C27  | 172.5(8)  |
| C24-C25-C26-C27 | -6.4(14)  | N6-C26-C27-C28  | 1.0(13)   |
| C25-C26-C27-C28 | -176.3(8) | C26-C27-C28-C29 | 2.1(13)   |
| C27-C28-C29-C30 | -2.5(14)  | C26-N6-C30-C29  | 3.2(12)   |

|                 |           |                 |           |
|-----------------|-----------|-----------------|-----------|
| Co1-N6-C30-C29  | -177.9(6) | C28-C29-C30-N6  | -0.2(13)  |
| O16-P1-C31-C32  | -56.8(7)  | O5-P1-C31-C32   | -178.1(6) |
| O12-P1-C31-C32  | 62.5(7)   | P1-C31-C32-C34  | 122.2(8)  |
| P1-C31-C32-C33  | -64.0(10) | C34-C32-C33-C35 | 2.0(12)   |
| C31-C32-C33-C35 | -172.0(8) | C33-C32-C34-C36 | -2.4(12)  |
| C31-C32-C34-C36 | 171.6(8)  | C32-C33-C35-C37 | 0.1(13)   |
| C32-C34-C36-C37 | 0.7(13)   | C33-C35-C37-C36 | -1.8(12)  |
| C33-C35-C37-C38 | 176.3(8)  | C34-C36-C37-C35 | 1.5(12)   |
| C34-C36-C37-C38 | -176.7(8) | C35-C37-C38-P2  | -70.7(10) |
| C36-C37-C38-P2  | 107.4(8)  | O21-P2-C38-C37  | -52.7(7)  |
| O19-P2-C38-C37  | 66.4(7)   | O20-P2-C38-C37  | -173.1(6) |

**Table S31.** Anisotropic atomic displacement parameters ( $\text{\AA}^2$ ) for  $[\text{Co}(2,2',\text{-bpy})_3](\text{H}_3\text{O})[\text{Mo}_5\text{O}_{15}(1,4\text{-O}_3\text{PC}_8\text{H}_8\text{O}_3\text{P})] \cdot 6\text{H}_2\text{O} (4 \cdot 6\text{H}_2\text{O})$ .

The anisotropic atomic displacement factor exponent takes the form:  $-2\pi^2 [ h^2 a^{*2} U_{11} + \dots + 2 h k a^* b^* U_{12} ]$

|     | $U_{11}$   | $U_{22}$   | $U_{33}$   | $U_{23}$   | $U_{13}$   | $U_{12}$   |
|-----|------------|------------|------------|------------|------------|------------|
| Mo1 | 0.0082(4)  | 0.0110(4)  | 0.0091(4)  | 0.0002(3)  | 0.0007(3)  | -0.0018(3) |
| Mo2 | 0.0105(4)  | 0.0093(4)  | 0.0102(4)  | -0.0007(3) | 0.0001(3)  | -0.0038(3) |
| Mo3 | 0.0101(4)  | 0.0080(4)  | 0.0102(4)  | -0.0004(3) | -0.0002(3) | -0.0005(3) |
| Mo4 | 0.0074(4)  | 0.0075(4)  | 0.0123(4)  | 0.0010(3)  | 0.0002(3)  | -0.0006(3) |
| Mo5 | 0.0086(4)  | 0.0085(4)  | 0.0104(4)  | -0.0014(3) | 0.0004(3)  | -0.0008(3) |
| Co1 | 0.0060(6)  | 0.0081(6)  | 0.0105(5)  | 0.0002(5)  | 0.0005(5)  | -0.0011(5) |
| P1  | 0.0076(11) | 0.0093(12) | 0.0085(10) | 0.0007(9)  | 0.0005(8)  | -0.0010(9) |
| P2  | 0.0099(12) | 0.0073(10) | 0.0082(10) | 0.0006(9)  | 0.0016(9)  | -0.0009(9) |
| O1  | 0.011(3)   | 0.012(3)   | 0.011(3)   | 0.000(3)   | 0.001(2)   | 0.000(2)   |
| O2  | 0.019(3)   | 0.011(3)   | 0.014(3)   | -0.003(3)  | 0.003(3)   | 0.000(3)   |
| O3  | 0.008(3)   | 0.023(3)   | 0.015(3)   | -0.003(3)  | 0.002(2)   | -0.002(3)  |
| O4  | 0.012(3)   | 0.011(3)   | 0.006(3)   | 0.002(2)   | 0.000(2)   | -0.003(2)  |
| O5  | 0.009(3)   | 0.008(3)   | 0.010(3)   | 0.001(2)   | 0.001(2)   | -0.003(2)  |
| O6  | 0.010(3)   | 0.021(3)   | 0.016(3)   | -0.004(3)  | -0.005(3)  | -0.006(3)  |
| O7  | 0.019(4)   | 0.009(3)   | 0.018(3)   | 0.000(3)   | 0.003(3)   | -0.003(3)  |
| O8  | 0.012(3)   | 0.014(3)   | 0.009(3)   | -0.002(3)  | 0.000(2)   | -0.004(2)  |
| O9  | 0.020(4)   | 0.012(3)   | 0.018(3)   | -0.001(3)  | -0.001(3)  | 0.003(3)   |
| O10 | 0.016(3)   | 0.017(3)   | 0.016(3)   | 0.001(3)   | -0.001(3)  | -0.001(3)  |

|     | <b>U<sub>11</sub></b> | <b>U<sub>22</sub></b> | <b>U<sub>33</sub></b> | <b>U<sub>23</sub></b> | <b>U<sub>13</sub></b> | <b>U<sub>12</sub></b> |
|-----|-----------------------|-----------------------|-----------------------|-----------------------|-----------------------|-----------------------|
| O11 | 0.010(3)              | 0.006(3)              | 0.012(3)              | 0.001(2)              | 0.002(2)              | 0.000(2)              |
| O12 | 0.007(3)              | 0.006(3)              | 0.013(3)              | 0.000(2)              | 0.002(2)              | 0.001(2)              |
| O13 | 0.008(3)              | 0.016(3)              | 0.021(3)              | -0.002(3)             | -0.003(2)             | -0.002(3)             |
| O14 | 0.012(3)              | 0.008(3)              | 0.015(3)              | 0.001(3)              | 0.006(3)              | 0.001(3)              |
| O15 | 0.011(3)              | 0.008(3)              | 0.012(3)              | -0.001(2)             | 0.002(2)              | -0.002(2)             |
| O16 | 0.012(3)              | 0.010(3)              | 0.012(3)              | 0.002(2)              | 0.000(2)              | 0.003(2)              |
| O17 | 0.014(3)              | 0.012(3)              | 0.018(3)              | -0.002(3)             | 0.002(3)              | 0.000(3)              |
| O18 | 0.015(3)              | 0.014(3)              | 0.013(3)              | -0.002(3)             | 0.001(2)              | -0.006(3)             |
| O19 | 0.009(3)              | 0.007(3)              | 0.012(3)              | -0.002(2)             | -0.002(2)             | 0.000(2)              |
| O20 | 0.007(3)              | 0.011(3)              | 0.011(3)              | 0.001(2)              | 0.002(2)              | -0.001(3)             |
| O21 | 0.009(3)              | 0.005(3)              | 0.011(3)              | -0.001(2)             | 0.002(2)              | -0.002(2)             |
| O90 | 0.025(4)              | 0.013(4)              | 0.028(4)              | 0.002(3)              | -0.004(3)             | 0.004(3)              |
| O91 | 0.054(6)              | 0.039(5)              | 0.052(6)              | 0.003(5)              | 0.005(5)              | 0.001(5)              |
| O92 | 0.060(6)              | 0.025(4)              | 0.021(4)              | 0.002(3)              | 0.009(4)              | 0.007(4)              |
| O93 | 0.023(4)              | 0.012(3)              | 0.039(4)              | -0.004(3)             | -0.014(4)             | 0.000(3)              |
| O94 | 0.065(7)              | 0.040(5)              | 0.023(4)              | -0.001(4)             | -0.005(4)             | 0.037(5)              |
| O96 | 0.095(9)              | 0.127(11)             | 0.063(7)              | 0.030(7)              | 0.027(7)              | 0.073(9)              |
| N1  | 0.005(3)              | 0.008(4)              | 0.011(3)              | -0.001(3)             | 0.000(3)              | -0.001(3)             |
| N2  | 0.009(4)              | 0.007(4)              | 0.013(3)              | 0.000(3)              | -0.001(3)             | -0.003(3)             |
| N3  | 0.013(4)              | 0.011(3)              | 0.007(3)              | 0.001(3)              | -0.002(3)             | -0.006(3)             |
| N4  | 0.007(3)              | 0.013(4)              | 0.014(4)              | 0.002(3)              | -0.001(3)             | -0.002(3)             |

|     | <b>U<sub>11</sub></b> | <b>U<sub>22</sub></b> | <b>U<sub>33</sub></b> | <b>U<sub>23</sub></b> | <b>U<sub>13</sub></b> | <b>U<sub>12</sub></b> |
|-----|-----------------------|-----------------------|-----------------------|-----------------------|-----------------------|-----------------------|
| N5  | 0.004(4)              | 0.010(3)              | 0.011(3)              | 0.001(3)              | 0.001(3)              | -0.005(3)             |
| N6  | 0.006(4)              | 0.008(3)              | 0.012(3)              | -0.004(3)             | 0.000(3)              | 0.003(3)              |
| C1  | 0.007(4)              | 0.011(4)              | 0.015(4)              | -0.001(4)             | 0.002(3)              | 0.002(4)              |
| C2  | 0.006(4)              | 0.020(5)              | 0.022(5)              | 0.000(4)              | -0.004(4)             | 0.007(4)              |
| C3  | 0.005(4)              | 0.015(5)              | 0.021(5)              | 0.002(4)              | 0.000(3)              | 0.002(4)              |
| C4  | 0.007(4)              | 0.015(5)              | 0.016(4)              | -0.004(4)             | 0.006(3)              | -0.005(4)             |
| C5  | 0.008(4)              | 0.004(4)              | 0.013(4)              | -0.006(3)             | -0.001(3)             | 0.002(3)              |
| C6  | 0.008(4)              | 0.010(5)              | 0.014(4)              | -0.003(3)             | 0.000(3)              | 0.003(4)              |
| C7  | 0.011(5)              | 0.018(5)              | 0.013(4)              | -0.003(4)             | -0.001(3)             | -0.010(4)             |
| C8  | 0.024(5)              | 0.016(5)              | 0.019(5)              | 0.005(4)              | 0.000(4)              | -0.004(4)             |
| C9  | 0.021(5)              | 0.015(5)              | 0.021(5)              | 0.004(4)              | -0.008(4)             | -0.008(4)             |
| C10 | 0.009(4)              | 0.009(5)              | 0.020(4)              | 0.001(4)              | -0.006(4)             | 0.000(4)              |
| C11 | 0.011(4)              | 0.014(4)              | 0.008(4)              | -0.002(3)             | -0.001(3)             | -0.005(4)             |
| C12 | 0.019(5)              | 0.020(5)              | 0.014(5)              | -0.001(4)             | 0.004(4)              | 0.005(4)              |
| C13 | 0.022(5)              | 0.012(5)              | 0.018(5)              | -0.009(4)             | -0.001(4)             | -0.009(4)             |
| C14 | 0.018(5)              | 0.006(4)              | 0.019(5)              | 0.001(4)              | -0.008(4)             | -0.003(4)             |
| C15 | 0.010(4)              | 0.013(4)              | 0.014(4)              | 0.005(3)              | -0.003(3)             | -0.002(4)             |
| C16 | 0.008(4)              | 0.013(4)              | 0.010(4)              | 0.005(3)              | 0.002(3)              | -0.003(3)             |
| C17 | 0.005(4)              | 0.018(5)              | 0.021(5)              | 0.005(4)              | -0.005(4)             | -0.006(4)             |
| C18 | 0.006(5)              | 0.025(5)              | 0.022(5)              | 0.010(4)              | 0.003(4)              | 0.003(4)              |
| C19 | 0.012(5)              | 0.019(5)              | 0.022(5)              | 0.006(4)              | 0.006(4)              | 0.005(4)              |

|     | <b>U<sub>11</sub></b> | <b>U<sub>22</sub></b> | <b>U<sub>33</sub></b> | <b>U<sub>23</sub></b> | <b>U<sub>13</sub></b> | <b>U<sub>12</sub></b> |
|-----|-----------------------|-----------------------|-----------------------|-----------------------|-----------------------|-----------------------|
| C20 | 0.014(5)              | 0.019(5)              | 0.010(4)              | 0.004(4)              | -0.001(4)             | 0.000(4)              |
| C21 | 0.011(5)              | 0.010(4)              | 0.017(4)              | -0.002(4)             | 0.000(4)              | 0.002(4)              |
| C22 | 0.017(5)              | 0.010(4)              | 0.021(5)              | 0.006(4)              | -0.003(4)             | 0.000(4)              |
| C23 | 0.014(5)              | 0.015(5)              | 0.016(4)              | 0.004(4)              | 0.001(4)              | -0.002(4)             |
| C24 | 0.017(5)              | 0.017(5)              | 0.014(4)              | -0.004(4)             | 0.004(4)              | 0.001(4)              |
| C25 | 0.003(4)              | 0.011(4)              | 0.015(4)              | -0.001(3)             | -0.002(3)             | 0.001(3)              |
| C26 | 0.003(4)              | 0.009(4)              | 0.017(4)              | -0.008(3)             | -0.001(4)             | -0.001(3)             |
| C27 | 0.012(5)              | 0.015(4)              | 0.013(4)              | 0.001(4)              | 0.000(4)              | 0.001(4)              |
| C28 | 0.023(6)              | 0.012(4)              | 0.017(4)              | -0.004(4)             | -0.005(4)             | 0.001(4)              |
| C29 | 0.018(5)              | 0.004(4)              | 0.022(5)              | -0.002(3)             | 0.002(4)              | -0.002(4)             |
| C30 | 0.009(5)              | 0.013(4)              | 0.021(5)              | 0.001(4)              | 0.005(4)              | 0.002(4)              |
| C31 | 0.011(4)              | 0.013(4)              | 0.010(4)              | 0.000(4)              | -0.002(3)             | 0.001(4)              |
| C32 | 0.006(4)              | 0.015(5)              | 0.008(4)              | -0.003(3)             | 0.001(3)              | -0.005(4)             |
| C33 | 0.005(4)              | 0.010(4)              | 0.018(4)              | 0.000(4)              | -0.005(4)             | -0.001(3)             |
| C34 | 0.010(4)              | 0.010(4)              | 0.011(4)              | -0.005(3)             | 0.003(4)              | 0.003(3)              |
| C35 | 0.012(5)              | 0.012(5)              | 0.012(4)              | -0.003(4)             | 0.000(3)              | 0.003(4)              |
| C36 | 0.011(4)              | 0.006(4)              | 0.015(4)              | -0.003(3)             | -0.003(4)             | 0.004(4)              |
| C37 | 0.015(5)              | 0.008(4)              | 0.013(4)              | -0.002(3)             | 0.002(3)              | -0.006(4)             |
| C38 | 0.013(5)              | 0.005(4)              | 0.016(4)              | -0.002(3)             | 0.005(3)              | -0.001(4)             |



**Table S32.** Hydrogen atomic coordinates and isotropic atomic displacement parameters ( $\text{\AA}^2$ ) for  $[\text{Co}(2,2'\text{-bpy})_3](\text{H}_3\text{O})[\text{Mo}_5\text{O}_{15}(1,4\text{-O}_3\text{PC}_8\text{H}_8\text{O}_3\text{P})] \cdot 6\text{H}_2\text{O} (4 \cdot 6\text{H}_2\text{O})$ .

|      | <b>x/a</b> | <b>y/b</b> | <b>z/c</b> | <b>U(eq)</b> |
|------|------------|------------|------------|--------------|
| H90A | 0.453(6)   | 0.853(3)   | 0.203(4)   | 0.026        |
| H90B | 0.493(7)   | 0.797(5)   | 0.237(2)   | 0.026        |
| H91A | 0.987(7)   | 0.305(6)   | 0.403(4)   | 0.058        |
| H91B | 0.931(8)   | 0.349(3)   | 0.442(6)   | 0.058        |
| H92A | 0.926(7)   | 0.388(5)   | 0.194(4)   | 0.042        |
| H92B | 0.954(8)   | 0.380(5)   | 0.132(2)   | 0.042        |
| H93A | 0.961(7)   | 0.155(3)   | 0.158(4)   | 0.03         |
| H93B | 0.983(7)   | 0.225(4)   | 0.182(3)   | 0.03         |
| H94A | 0.005(6)   | 0.281(5)   | 0.012(5)   | 0.051        |
| H94B | 0.070(7)   | 0.283(5)   | 0.064(4)   | 0.051        |
| H96A | 0.030(13)  | 0.276(5)   | 0.333(6)   | 0.114        |
| H96B | 0.060(12)  | 0.302(8)   | 0.273(4)   | 0.114        |
| H1   | 0.6204     | 0.9849     | 0.8113     | 0.013        |
| H2   | 0.4641     | 0.9665     | 0.8075     | 0.019        |
| H3   | 0.3926     | 0.8927     | 0.8884     | 0.016        |
| H4   | 0.4803     | 0.8433     | 0.9731     | 0.015        |
| H7   | 0.5765     | 0.8267     | 1.0617     | 0.016        |
| H8   | 0.6892     | 0.7794     | 1.1325     | 0.023        |
| H9   | 0.8414     | 0.7738     | 1.0966     | 0.023        |

|      | <b>x/a</b> | <b>y/b</b> | <b>z/c</b> | <b>U(eq)</b> |
|------|------------|------------|------------|--------------|
| H10  | 0.8772     | 0.8251     | 0.9964     | 0.015        |
| H11  | 0.6768     | 1.0425     | 0.9666     | 0.013        |
| H12  | 0.7171     | 1.1407     | 1.0359     | 0.021        |
| H13  | 0.8714     | 1.1638     | 1.0573     | 0.021        |
| H14  | 0.9808     | 1.0794     | 1.0148     | 0.017        |
| H17  | 1.0751     | 0.9833     | 0.9740     | 0.018        |
| H18  | 1.1549     | 0.8861     | 0.9230     | 0.021        |
| H19  | 1.0764     | 0.7993     | 0.8560     | 0.021        |
| H20  | 0.9213     | 0.8105     | 0.8433     | 0.017        |
| H21  | 0.8039     | 1.0854     | 0.8501     | 0.015        |
| H22  | 0.8499     | 1.1436     | 0.7541     | 0.019        |
| H23  | 0.8791     | 1.0704     | 0.6626     | 0.018        |
| H24  | 0.8477     | 0.9387     | 0.6661     | 0.019        |
| H27  | 0.7929     | 0.8179     | 0.6746     | 0.016        |
| H28  | 0.7424     | 0.6942     | 0.6971     | 0.021        |
| H29  | 0.6933     | 0.6636     | 0.8009     | 0.018        |
| H30  | 0.7043     | 0.7539     | 0.8831     | 0.017        |
| H31A | 0.4768     | 0.9892     | 0.2673     | 0.014        |
| H31B | 0.4164     | 1.0579     | 0.2912     | 0.014        |
| H33  | 0.2471     | 1.0081     | 0.3276     | 0.013        |
| H34  | 0.4761     | 0.8830     | 0.3364     | 0.013        |

|      | <b>x/a</b> | <b>y/b</b> | <b>z/c</b> | <b>U(eq)</b> |
|------|------------|------------|------------|--------------|
| H35  | 0.1871     | 0.9392     | 0.4136     | 0.015        |
| H36  | 0.4181     | 0.8145     | 0.4230     | 0.013        |
| H38A | 0.2981     | 0.7832     | 0.4963     | 0.014        |
| H38B | 0.1983     | 0.8099     | 0.4787     | 0.014        |

**Table S33.** Sample and crystal data for [ $\{\text{Cu}(2,2\text{-bpy})_2\}_2\text{Mo}_5\text{O}_{15}(1,4\text{-O}_3\text{PC}_8\text{H}_8\text{PO}_3)$ ]  $\cdot 6\text{H}_2\text{O}$  (**5** $\cdot 6\text{H}_2\text{O}$ ).

|                        |                                                                                                                                             |                            |
|------------------------|---------------------------------------------------------------------------------------------------------------------------------------------|----------------------------|
| Identification code    | [ $\{\text{Cu}(2,2\text{-bpy})_2\}_2\text{Mo}_5\text{O}_{15}(1,4\text{-O}_3\text{PC}_8\text{H}_8\text{PO}_3)$ ] $\cdot 6\text{H}_2\text{O}$ |                            |
| Chemical formula       | $\text{C}_{48}\text{H}_{52}\text{Cu}_2\text{Mo}_5\text{N}_8\text{O}_{27}\text{P}_2$                                                         |                            |
| Formula weight         | 1841.69                                                                                                                                     |                            |
| Temperature            | 90(2) K                                                                                                                                     |                            |
| Wavelength             | 0.71073 Å                                                                                                                                   |                            |
| Crystal size           | 0.063 x 0.064 x 0.123 mm                                                                                                                    |                            |
| Crystal system         | Triclinic                                                                                                                                   |                            |
| Space group            | P -1                                                                                                                                        |                            |
| Unit cell dimensions   | $a = 13.0366(13)$ Å                                                                                                                         | $\alpha = 76.271(3)^\circ$ |
|                        | $b = 13.0703(13)$ Å                                                                                                                         | $\beta = 85.514(3)^\circ$  |
|                        | $c = 20.989(2)$ Å                                                                                                                           | $\gamma = 60.541(3)^\circ$ |
| Volume                 | $3021.9(5)$ Å <sup>3</sup>                                                                                                                  |                            |
| Z                      | 2                                                                                                                                           |                            |
| Density (calculated)   | $2.024$ g/cm <sup>3</sup>                                                                                                                   |                            |
| Absorption coefficient | $1.840$ mm <sup>-1</sup>                                                                                                                    |                            |
| F(000)                 | 1820                                                                                                                                        |                            |

**Table S34.** Data collection and structure refinement for [ $\{\text{Cu}(2,2\text{-bpy})_2\}_2\text{Mo}_5\text{O}_{15}(1,4\text{-O}_3\text{PC}_8\text{H}_8\text{PO}_3)] \cdot 6\text{H}_2\text{O}$  (**5**·6H<sub>2</sub>O).

|                                     |                                                                            |                           |
|-------------------------------------|----------------------------------------------------------------------------|---------------------------|
| Theta range for data collection     | 1.80 to 25.03°                                                             |                           |
| Index ranges                        | -14≤h≤15, -15≤k≤15, -24≤l≤24                                               |                           |
| Reflections collected               | 33166                                                                      |                           |
| Independent reflections             | 10663 [R(int) = 0.0530]                                                    |                           |
| Coverage of independent reflections | 99.8%                                                                      |                           |
| Absorption correction               | multi-scan                                                                 |                           |
| Max. and min. transmission          | 0.8930 and 0.8050                                                          |                           |
| Structure solution technique        | direct methods                                                             |                           |
| Structure solution program          | SHELXS-97 (Sheldrick, 2008)                                                |                           |
| Refinement method                   | Full-matrix least-squares on F <sup>2</sup>                                |                           |
| Refinement program                  | SHELXL-2013 (Sheldrick, 2013)                                              |                           |
| Function minimized                  | $\Sigma w(F_o^2 - F_c^2)^2$                                                |                           |
| Data / restraints / parameters      | 10663 / 6 / 821                                                            |                           |
| Goodness-of-fit on F <sup>2</sup>   | 1.041                                                                      |                           |
| $\Delta/\sigma_{\text{max}}$        | 2.070                                                                      |                           |
| Final R indices                     | 8149 data; I>2σ(I)                                                         | R1 = 0.0450, wR2 = 0.1178 |
|                                     | all data                                                                   | R1 = 0.0671, wR2 = 0.1292 |
| Weighting scheme                    | $w=1/[\sigma^2(F_o^2)+(0.0606P)^2+18.5078P]$<br>where $P=(F_o^2+2F_c^2)/3$ |                           |
| Largest diff. peak and hole         | 2.114 and -0.767 eÅ <sup>-3</sup>                                          |                           |
| R.M.S. deviation from mean          | 0.182 eÅ <sup>-3</sup>                                                     |                           |

**Table S35.** Atomic coordinates and equivalent isotropic atomic displacement parameters ( $\text{\AA}^2$ ) for  $[\{\text{Cu}(2,2\text{-bpy})_2\}_2\text{Mo}_5\text{O}_{15}(1,4\text{-O}_3\text{PC}_8\text{H}_8\text{PO}_3)] \cdot 6\text{H}_2\text{O}$  (**5**·6H<sub>2</sub>O).

U(eq) is defined as one third of the trace of the orthogonalized  $U_{ij}$  tensor.

|     | <b>x/a</b>  | <b>y/b</b>  | <b>z/c</b> | <b>U(eq)</b> |
|-----|-------------|-------------|------------|--------------|
| Mo1 | 0.91934(5)  | 0.89271(5)  | 0.27787(3) | 0.01296(15)  |
| Mo2 | 0.19444(5)  | 0.77422(5)  | 0.34394(3) | 0.00851(14)  |
| Mo3 | 0.38579(5)  | 0.56473(5)  | 0.26304(3) | 0.00997(14)  |
| Mo4 | 0.23353(5)  | 0.52310(5)  | 0.15856(3) | 0.01144(15)  |
| Mo5 | 0.94417(5)  | 0.67798(5)  | 0.18352(3) | 0.01327(15)  |
| Cu1 | 0.31923(7)  | 0.92749(7)  | 0.38978(4) | 0.01181(19)  |
| Cu2 | 0.38905(8)  | 0.23734(7)  | 0.12499(4) | 0.01240(19)  |
| P1  | 0.13555(16) | 0.80838(15) | 0.17694(9) | 0.0113(4)    |
| P2  | 0.12333(15) | 0.57034(15) | 0.31523(8) | 0.0090(4)    |
| O1  | 0.8620(4)   | 0.8507(4)   | 0.3492(3)  | 0.0184(11)   |
| O2  | 0.8157(4)   | 0.0390(4)   | 0.2503(3)  | 0.0200(12)   |
| O3  | 0.0421(4)   | 0.9078(4)   | 0.3154(2)  | 0.0110(10)   |
| O4  | 0.0218(4)   | 0.9137(4)   | 0.1908(2)  | 0.0143(11)   |
| O5  | 0.8887(4)   | 0.8090(4)   | 0.2252(2)  | 0.0158(11)   |
| O6  | 0.1803(4)   | 0.7492(4)   | 0.4267(2)  | 0.0132(10)   |
| O7  | 0.2715(4)   | 0.8557(4)   | 0.3301(2)  | 0.0123(10)   |
| O8  | 0.3219(4)   | 0.6164(4)   | 0.3424(2)  | 0.0095(10)   |
| O9  | 0.2305(4)   | 0.7600(4)   | 0.2320(2)  | 0.0118(10)   |

|     | <b>x/a</b> | <b>y/b</b> | <b>z/c</b> | <b>U(eq)</b> |
|-----|------------|------------|------------|--------------|
| O10 | 0.4810(4)  | 0.6216(4)  | 0.2455(2)  | 0.0160(11)   |
| O11 | 0.4796(4)  | 0.4149(4)  | 0.2949(2)  | 0.0152(11)   |
| O12 | 0.3500(4)  | 0.5639(4)  | 0.1765(2)  | 0.0136(10)   |
| O13 | 0.2326(4)  | 0.5195(4)  | 0.2730(2)  | 0.0095(10)   |
| O14 | 0.2388(5)  | 0.5542(4)  | 0.0754(2)  | 0.0190(11)   |
| O15 | 0.3157(4)  | 0.3656(4)  | 0.1824(2)  | 0.0144(11)   |
| O16 | 0.0828(4)  | 0.5341(4)  | 0.1686(2)  | 0.0131(10)   |
| O17 | 0.1104(4)  | 0.7082(4)  | 0.1682(2)  | 0.0121(10)   |
| O18 | 0.8992(5)  | 0.7557(4)  | 0.1038(2)  | 0.0220(12)   |
| O19 | 0.8454(4)  | 0.6261(4)  | 0.2041(2)  | 0.0178(11)   |
| O20 | 0.0183(4)  | 0.5735(4)  | 0.2882(2)  | 0.0121(10)   |
| O21 | 0.0906(4)  | 0.6986(4)  | 0.3211(2)  | 0.0110(10)   |
| O90 | 0.7727(7)  | 0.7085(7)  | 0.4158(5)  | 0.064(2)     |
| O91 | 0.7208(7)  | 0.4175(8)  | 0.2929(5)  | 0.071(3)     |
| O92 | 0.7841(9)  | 0.5691(7)  | 0.3318(5)  | 0.077(3)     |
| N1  | 0.4225(5)  | 0.0079(5)  | 0.3690(3)  | 0.0136(13)   |
| N2  | 0.1985(5)  | 0.0902(5)  | 0.3453(3)  | 0.0125(12)   |
| N3  | 0.4362(5)  | 0.7638(5)  | 0.4374(3)  | 0.0137(13)   |
| N4  | 0.2466(5)  | 0.9271(5)  | 0.4811(3)  | 0.0133(13)   |
| N5  | 0.3816(6)  | 0.2879(6)  | 0.0257(3)  | 0.0202(14)   |
| N6  | 0.5219(5)  | 0.2727(5)  | 0.1139(3)  | 0.0155(13)   |

|     | <b>x/a</b> | <b>y/b</b> | <b>z/c</b> | <b>U(eq)</b> |
|-----|------------|------------|------------|--------------|
| N7  | 0.4634(5)  | 0.0671(5)  | 0.1849(3)  | 0.0134(13)   |
| N8  | 0.2476(5)  | 0.2148(5)  | 0.1357(3)  | 0.0147(13)   |
| C1  | 0.5365(6)  | 0.9602(6)  | 0.3854(4)  | 0.0181(16)   |
| C2  | 0.5947(7)  | 0.0263(7)  | 0.3731(4)  | 0.0198(17)   |
| C3  | 0.5332(6)  | 0.1471(6)  | 0.3433(4)  | 0.0167(16)   |
| C4  | 0.4141(6)  | 0.1985(6)  | 0.3259(3)  | 0.0137(15)   |
| C5  | 0.3611(6)  | 0.1266(6)  | 0.3393(3)  | 0.0119(14)   |
| C6  | 0.2355(6)  | 0.1713(6)  | 0.3240(3)  | 0.0096(14)   |
| C7  | 0.1587(6)  | 0.2880(6)  | 0.2904(3)  | 0.0147(15)   |
| C8  | 0.0401(6)  | 0.3240(6)  | 0.2819(4)  | 0.0149(15)   |
| C9  | 0.0036(7)  | 0.2382(6)  | 0.3056(4)  | 0.0187(16)   |
| C10 | 0.0853(6)  | 0.1230(6)  | 0.3353(4)  | 0.0176(16)   |
| C11 | 0.5293(7)  | 0.6857(6)  | 0.4099(4)  | 0.0190(16)   |
| C12 | 0.6101(6)  | 0.5739(6)  | 0.4459(4)  | 0.0170(16)   |
| C13 | 0.5952(7)  | 0.5419(7)  | 0.5114(4)  | 0.0203(17)   |
| C14 | 0.4988(6)  | 0.6229(6)  | 0.5400(4)  | 0.0164(16)   |
| C15 | 0.4192(7)  | 0.7323(6)  | 0.5015(3)  | 0.0146(15)   |
| C16 | 0.3089(6)  | 0.8224(6)  | 0.5257(4)  | 0.0140(15)   |
| C17 | 0.2712(7)  | 0.8028(7)  | 0.5891(4)  | 0.0181(16)   |
| C18 | 0.1717(7)  | 0.8932(7)  | 0.6077(4)  | 0.0180(16)   |
| C19 | 0.1077(7)  | 0.0023(7)  | 0.5627(4)  | 0.0206(17)   |



|     | <b>x/a</b> | <b>y/b</b> | <b>z/c</b> | <b>U(eq)</b> |
|-----|------------|------------|------------|--------------|
| C20 | 0.1486(6)  | 0.0138(7)  | 0.4999(4)  | 0.0172(16)   |
| C21 | 0.3089(8)  | 0.2866(9)  | 0.9842(4)  | 0.033(2)     |
| C22 | 0.3140(9)  | 0.3171(9)  | 0.9175(4)  | 0.039(2)     |
| C23 | 0.3984(9)  | 0.3488(9)  | 0.8919(4)  | 0.038(2)     |
| C24 | 0.4750(7)  | 0.3478(7)  | 0.9342(4)  | 0.0262(19)   |
| C25 | 0.4645(7)  | 0.3171(7)  | 0.0011(4)  | 0.0204(17)   |
| C26 | 0.5413(7)  | 0.3130(6)  | 0.0505(4)  | 0.0179(16)   |
| C27 | 0.6260(7)  | 0.3482(7)  | 0.0358(4)  | 0.028(2)     |
| C28 | 0.6891(8)  | 0.3459(8)  | 0.0871(5)  | 0.035(2)     |
| C29 | 0.6674(7)  | 0.3071(8)  | 0.1511(5)  | 0.032(2)     |
| C30 | 0.5822(7)  | 0.2714(7)  | 0.1621(4)  | 0.0199(17)   |
| C31 | 0.5767(6)  | 0.9961(6)  | 0.2058(4)  | 0.0169(16)   |
| C32 | 0.6232(7)  | 0.8740(7)  | 0.2335(4)  | 0.0198(17)   |
| C33 | 0.5511(7)  | 0.8233(7)  | 0.2375(4)  | 0.0199(17)   |
| C34 | 0.4324(7)  | 0.8969(6)  | 0.2169(3)  | 0.0153(16)   |
| C35 | 0.3912(6)  | 0.0180(6)  | 0.1919(3)  | 0.0133(15)   |
| C36 | 0.2672(6)  | 0.1052(6)  | 0.1701(3)  | 0.0139(15)   |
| C37 | 0.1761(7)  | 0.0787(7)  | 0.1840(4)  | 0.0201(17)   |
| C38 | 0.0629(7)  | 0.1659(7)  | 0.1618(4)  | 0.0249(18)   |
| C39 | 0.0423(7)  | 0.2795(7)  | 0.1270(4)  | 0.0208(17)   |
| C40 | 0.1367(7)  | 0.3009(7)  | 0.1155(4)  | 0.0182(16)   |

|     | <b>x/a</b> | <b>y/b</b> | <b>z/c</b> | <b>U(eq)</b> |
|-----|------------|------------|------------|--------------|
| C41 | 0.1905(6)  | 0.8558(6)  | 0.1005(3)  | 0.0161(16)   |
| C42 | 0.0933(7)  | 0.9307(6)  | 0.0470(3)  | 0.0170(16)   |
| C43 | 0.0448(7)  | 0.8763(6)  | 0.0191(4)  | 0.0210(18)   |
| C44 | 0.0477(7)  | 0.0539(7)  | 0.0269(3)  | 0.0197(17)   |
| C45 | 0.1695(6)  | 0.4688(6)  | 0.3958(3)  | 0.0120(14)   |
| C46 | 0.0799(6)  | 0.4881(6)  | 0.4483(3)  | 0.0120(14)   |
| C47 | 0.0216(7)  | 0.4193(6)  | 0.4615(4)  | 0.0174(16)   |
| C48 | 0.0554(6)  | 0.5695(6)  | 0.4877(4)  | 0.0172(16)   |

**Table S36.** Bond lengths (Å) for [ $\{\text{Cu}(2,2\text{-bpy})_2\}_2\text{Mo}_5\text{O}_{15}(1,4\text{-O}_3\text{PC}_8\text{H}_8\text{PO}_3)\} \cdot 6\text{H}_2\text{O} (\mathbf{5} \cdot 6\text{H}_2\text{O})$ ].

|         |          |         |          |
|---------|----------|---------|----------|
| Mo1-O2  | 1.695(5) | Mo1-O1  | 1.716(5) |
| Mo1-O5  | 1.911(5) | Mo1-O3  | 1.950(5) |
| Mo1-O4  | 2.223(5) | Mo1-O21 | 2.429(5) |
| Mo2-O6  | 1.702(5) | Mo2-O7  | 1.757(5) |
| Mo2-O3  | 1.905(5) | Mo2-O8  | 1.916(4) |
| Mo2-O21 | 2.164(5) | Mo2-O9  | 2.393(5) |
| Mo3-O11 | 1.712(5) | Mo3-O10 | 1.713(5) |
| Mo3-O12 | 1.914(5) | Mo3-O8  | 1.920(4) |
| Mo3-O9  | 2.318(4) | Mo3-O13 | 2.328(4) |
| Mo4-O14 | 1.700(5) | Mo4-O15 | 1.750(5) |
| Mo4-O16 | 1.896(5) | Mo4-O12 | 1.926(5) |
| Mo4-O17 | 2.198(5) | Mo4-O13 | 2.390(4) |
| Mo5-O19 | 1.714(5) | Mo5-O18 | 1.714(5) |
| Mo5-O5  | 1.901(5) | Mo5-O16 | 1.937(5) |
| Mo5-O20 | 2.289(5) | Mo5-O17 | 2.373(5) |
| Cu1-N2  | 1.966(6) | Cu1-N3  | 1.979(6) |
| Cu1-O7  | 2.022(5) | Cu1-N1  | 2.048(6) |
| Cu1-N4  | 2.071(6) | Cu2-N6  | 1.985(6) |
| Cu2-N8  | 1.993(6) | Cu2-N5  | 2.027(6) |
| Cu2-N7  | 2.052(6) | Cu2-O15 | 2.093(5) |
| P1-O4   | 1.514(5) | P1-O9   | 1.541(5) |

|          |           |          |          |
|----------|-----------|----------|----------|
| P1-O17   | 1.550(5)  | P1-C41   | 1.805(7) |
| P2-O20   | 1.500(5)  | P2-O21   | 1.547(5) |
| P2-O13   | 1.552(5)  | P2-C45   | 1.814(7) |
| O90-H90A | 0.86(2)   | O90-H90B | 0.85(2)  |
| O91-H91A | 0.84(2)   | O91-H91B | 0.84(2)  |
| O92-H92A | 0.96(4)   | O92-H92B | 0.85(2)  |
| N1-C1    | 1.335(9)  | N1-C5    | 1.354(9) |
| N2-C10   | 1.337(9)  | N2-C6    | 1.342(9) |
| N3-C11   | 1.343(9)  | N3-C15   | 1.344(9) |
| N4-C20   | 1.335(9)  | N4-C16   | 1.352(9) |
| N5-C21   | 1.343(10) | N5-C25   | 1.344(9) |
| N6-C30   | 1.321(10) | N6-C26   | 1.364(9) |
| N7-C31   | 1.340(9)  | N7-C35   | 1.359(9) |
| N8-C40   | 1.344(10) | N8-C36   | 1.348(9) |
| C1-C2    | 1.378(10) | C1-H1    | 0.95     |
| C2-C3    | 1.375(10) | C2-H2    | 0.95     |
| C3-C4    | 1.393(10) | C3-H3    | 0.95     |
| C4-C5    | 1.386(10) | C4-H4    | 0.95     |
| C5-C6    | 1.476(10) | C6-C7    | 1.387(9) |
| C7-C8    | 1.390(10) | C7-H7    | 0.95     |
| C8-C9    | 1.397(10) | C8-H8    | 0.95     |
| C9-C10   | 1.368(10) | C9-H9    | 0.95     |

|         |           |         |           |
|---------|-----------|---------|-----------|
| C10-H10 | 0.95      | C11-C12 | 1.379(10) |
| C11-H11 | 0.95      | C12-C13 | 1.367(10) |
| C12-H12 | 0.95      | C13-C14 | 1.392(11) |
| C13-H13 | 0.95      | C14-C15 | 1.377(10) |
| C14-H14 | 0.95      | C15-C16 | 1.490(10) |
| C16-C17 | 1.392(10) | C17-C18 | 1.364(11) |
| C17-H17 | 0.95      | C18-C19 | 1.391(11) |
| C18-H18 | 0.95      | C19-C20 | 1.385(10) |
| C19-H19 | 0.95      | C20-H20 | 0.95      |
| C21-C22 | 1.368(11) | C21-H21 | 0.95      |
| C22-C23 | 1.386(13) | C22-H22 | 0.95      |
| C23-C24 | 1.380(13) | C23-H23 | 0.95      |
| C24-C25 | 1.382(11) | C24-H24 | 0.95      |
| C25-C26 | 1.470(11) | C26-C27 | 1.380(11) |
| C27-C28 | 1.391(13) | C27-H27 | 0.95      |
| C28-C29 | 1.379(12) | C28-H28 | 0.95      |
| C29-C30 | 1.386(11) | C29-H29 | 0.95      |
| C30-H30 | 0.95      | C31-C32 | 1.383(10) |
| C31-H31 | 0.95      | C32-C33 | 1.380(11) |
| C32-H32 | 0.95      | C33-C34 | 1.397(11) |
| C33-H33 | 0.95      | C34-C35 | 1.373(10) |
| C34-H34 | 0.95      | C35-C36 | 1.475(10) |

|          |           |          |           |
|----------|-----------|----------|-----------|
| C36-C37  | 1.384(10) | C37-C38  | 1.376(11) |
| C37-H37  | 0.95      | C38-C39  | 1.391(11) |
| C38-H38  | 0.95      | C39-C40  | 1.382(10) |
| C39-H39  | 0.95      | C40-H40  | 0.95      |
| C41-C42  | 1.519(10) | C41-H41A | 0.99      |
| C41-H41B | 0.99      | C42-C44  | 1.378(10) |
| C42-C43  | 1.395(11) | C43-C44  | 1.379(11) |
| C43-H43  | 0.95      | C44-C43  | 1.379(11) |
| C44-H44  | 0.95      | C45-C46  | 1.511(9)  |
| C45-H45A | 0.99      | C45-H45B | 0.99      |
| C46-C48  | 1.400(10) | C46-C47  | 1.408(10) |
| C47-C48  | 1.388(10) | C47-H47  | 0.95      |
| C48-C47  | 1.388(10) | C48-H48  | 0.95      |

**Table S37.** Bond angles (°) for  $[\{\text{Cu}(2,2\text{-bpy})_2\}_2\text{Mo}_5\text{O}_{15}(1,4\text{-O}_3\text{PC}_8\text{H}_8\text{PO}_3)] \cdot 6\text{H}_2\text{O} (\mathbf{5} \cdot 6\text{H}_2\text{O})$ .

|             |            |             |            |
|-------------|------------|-------------|------------|
| O2-Mo1-O1   | 102.2(2)   | O2-Mo1-O5   | 103.9(2)   |
| O1-Mo1-O5   | 98.3(2)    | O2-Mo1-O3   | 102.1(2)   |
| O1-Mo1-O3   | 99.0(2)    | O5-Mo1-O3   | 144.8(2)   |
| O2-Mo1-O4   | 88.2(2)    | O1-Mo1-O4   | 169.5(2)   |
| O5-Mo1-O4   | 79.75(19)  | O3-Mo1-O4   | 77.77(19)  |
| O2-Mo1-O21  | 169.3(2)   | O1-Mo1-O21  | 81.7(2)    |
| O5-Mo1-O21  | 85.23(18)  | O3-Mo1-O21  | 67.31(17)  |
| O4-Mo1-O21  | 87.91(16)  | O6-Mo2-O7   | 103.4(2)   |
| O6-Mo2-O3   | 100.3(2)   | O7-Mo2-O3   | 97.1(2)    |
| O6-Mo2-O8   | 96.9(2)    | O7-Mo2-O8   | 99.8(2)    |
| O3-Mo2-O8   | 152.4(2)   | O6-Mo2-O21  | 97.8(2)    |
| O7-Mo2-O21  | 158.2(2)   | O3-Mo2-O21  | 74.07(18)  |
| O8-Mo2-O21  | 82.33(18)  | O6-Mo2-O9   | 166.60(18) |
| O7-Mo2-O9   | 85.44(19)  | O3-Mo2-O9   | 88.37(17)  |
| O8-Mo2-O9   | 71.44(17)  | O21-Mo2-O9  | 74.64(16)  |
| O11-Mo3-O10 | 102.1(2)   | O11-Mo3-O12 | 101.9(2)   |
| O10-Mo3-O12 | 100.1(2)   | O11-Mo3-O8  | 100.0(2)   |
| O10-Mo3-O8  | 100.8(2)   | O12-Mo3-O8  | 145.6(2)   |
| O11-Mo3-O9  | 168.39(19) | O10-Mo3-O9  | 88.6(2)    |
| O12-Mo3-O9  | 80.42(18)  | O8-Mo3-O9   | 73.16(17)  |
| O11-Mo3-O13 | 87.9(2)    | O10-Mo3-O13 | 169.4(2)   |

|             |            |             |           |
|-------------|------------|-------------|-----------|
| O12-Mo3-O13 | 73.87(18)  | O8-Mo3-O13  | 80.80(17) |
| O9-Mo3-O13  | 81.82(16)  | O14-Mo4-O15 | 104.3(2)  |
| O14-Mo4-O16 | 100.7(2)   | O15-Mo4-O16 | 96.5(2)   |
| O14-Mo4-O12 | 97.1(2)    | O15-Mo4-O12 | 99.7(2)   |
| O16-Mo4-O12 | 152.1(2)   | O14-Mo4-O17 | 97.4(2)   |
| O15-Mo4-O17 | 157.62(19) | O16-Mo4-O17 | 73.81(18) |
| O12-Mo4-O17 | 82.77(18)  | O14-Mo4-O13 | 166.5(2)  |
| O15-Mo4-O13 | 85.95(19)  | O16-Mo4-O13 | 86.49(18) |
| O12-Mo4-O13 | 72.22(17)  | O17-Mo4-O13 | 73.55(16) |
| O19-Mo5-O18 | 101.4(2)   | O19-Mo5-O5  | 103.7(2)  |
| O18-Mo5-O5  | 100.1(2)   | O19-Mo5-O16 | 101.3(2)  |
| O18-Mo5-O16 | 99.5(2)    | O5-Mo5-O16  | 144.2(2)  |
| O19-Mo5-O20 | 82.8(2)    | O18-Mo5-O20 | 175.5(2)  |
| O5-Mo5-O20  | 80.24(19)  | O16-Mo5-O20 | 77.95(18) |
| O19-Mo5-O17 | 167.7(2)   | O18-Mo5-O17 | 88.1(2)   |
| O5-Mo5-O17  | 82.00(18)  | O16-Mo5-O17 | 69.11(18) |
| O20-Mo5-O17 | 87.48(16)  | N2-Cu1-N3   | 177.6(2)  |
| N2-Cu1-O7   | 89.9(2)    | N3-Cu1-O7   | 90.4(2)   |
| N2-Cu1-N1   | 81.1(2)    | N3-Cu1-N1   | 100.5(2)  |
| O7-Cu1-N1   | 128.0(2)   | N2-Cu1-N4   | 97.0(2)   |
| N3-Cu1-N4   | 80.8(2)    | O7-Cu1-N4   | 115.4(2)  |
| N1-Cu1-N4   | 116.6(2)   | N6-Cu2-N8   | 175.8(2)  |



|               |           |               |           |
|---------------|-----------|---------------|-----------|
| N6-Cu2-N5     | 81.2(3)   | N8-Cu2-N5     | 98.4(2)   |
| N6-Cu2-N7     | 102.8(2)  | N8-Cu2-N7     | 80.8(2)   |
| N5-Cu2-N7     | 129.3(2)  | N6-Cu2-O15    | 86.3(2)   |
| N8-Cu2-O15    | 90.4(2)   | N5-Cu2-O15    | 121.2(2)  |
| N7-Cu2-O15    | 109.5(2)  | O4-P1-O9      | 111.2(3)  |
| O4-P1-O17     | 109.3(3)  | O9-P1-O17     | 111.2(3)  |
| O4-P1-C41     | 109.7(3)  | O9-P1-C41     | 108.5(3)  |
| O17-P1-C41    | 106.8(3)  | O20-P2-O21    | 109.4(3)  |
| O20-P2-O13    | 112.3(3)  | O21-P2-O13    | 110.6(2)  |
| O20-P2-C45    | 110.3(3)  | O21-P2-C45    | 109.0(3)  |
| O13-P2-C45    | 105.0(3)  | Mo2-O3-Mo1    | 123.0(2)  |
| P1-O4-Mo1     | 121.7(3)  | Mo5-O5-Mo1    | 149.8(3)  |
| Mo2-O7-Cu1    | 132.2(3)  | Mo2-O8-Mo3    | 123.6(2)  |
| P1-O9-Mo3     | 126.8(3)  | P1-O9-Mo2     | 125.8(3)  |
| Mo3-O9-Mo2    | 91.71(16) | Mo3-O12-Mo4   | 122.7(2)  |
| P2-O13-Mo3    | 126.4(3)  | P2-O13-Mo4    | 127.3(3)  |
| Mo3-O13-Mo4   | 91.15(15) | Mo4-O15-Cu2   | 129.8(3)  |
| Mo4-O16-Mo5   | 122.4(2)  | P1-O17-Mo4    | 129.9(3)  |
| P1-O17-Mo5    | 134.3(3)  | Mo4-O17-Mo5   | 94.53(17) |
| P2-O20-Mo5    | 120.8(3)  | P2-O21-Mo2    | 132.6(3)  |
| P2-O21-Mo1    | 130.5(3)  | Mo2-O21-Mo1   | 94.91(16) |
| H90A-O90-H90B | 118.(10)  | H91A-O91-H91B | 104.(10)  |

|               |          |            |          |
|---------------|----------|------------|----------|
| H92A-O92-H92B | 135.(10) | C1-N1-C5   | 118.7(6) |
| C1-N1-Cu1     | 128.1(5) | C5-N1-Cu1  | 113.0(5) |
| C10-N2-C6     | 119.5(6) | C10-N2-Cu1 | 124.5(5) |
| C6-N2-Cu1     | 116.0(5) | C11-N3-C15 | 119.6(6) |
| C11-N3-Cu1    | 124.2(5) | C15-N3-Cu1 | 116.2(5) |
| C20-N4-C16    | 118.2(6) | C20-N4-Cu1 | 128.8(5) |
| C16-N4-Cu1    | 113.1(5) | C21-N5-C25 | 119.2(7) |
| C21-N5-Cu2    | 126.5(5) | C25-N5-Cu2 | 114.1(5) |
| C30-N6-C26    | 119.4(6) | C30-N6-Cu2 | 125.4(5) |
| C26-N6-Cu2    | 114.8(5) | C31-N7-C35 | 118.9(6) |
| C31-N7-Cu2    | 127.2(5) | C35-N7-Cu2 | 112.7(5) |
| C40-N8-C36    | 119.1(6) | C40-N8-Cu2 | 125.4(5) |
| C36-N8-Cu2    | 115.3(5) | N1-C1-C2   | 122.9(7) |
| N1-C1-H1      | 118.6    | C2-C1-H1   | 118.6    |
| C3-C2-C1      | 119.0(7) | C3-C2-H2   | 120.5    |
| C1-C2-H2      | 120.5    | C2-C3-C4   | 118.9(7) |
| C2-C3-H3      | 120.5    | C4-C3-H3   | 120.5    |
| C5-C4-C3      | 119.1(7) | C5-C4-H4   | 120.4    |
| C3-C4-H4      | 120.4    | N1-C5-C4   | 121.4(7) |
| N1-C5-C6      | 114.7(6) | C4-C5-C6   | 124.0(6) |
| N2-C6-C7      | 121.0(6) | N2-C6-C5   | 115.1(6) |
| C7-C6-C5      | 123.9(6) | C6-C7-C8   | 119.7(6) |

|             |          |             |          |
|-------------|----------|-------------|----------|
| C6-C7-H7    | 120.2    | C8-C7-H7    | 120.2    |
| C7-C8-C9    | 118.0(7) | C7-C8-H8    | 121.0    |
| C9-C8-H8    | 121.0    | C10-C9-C8   | 119.1(7) |
| C10-C9-H9   | 120.5    | C8-C9-H9    | 120.5    |
| N2-C10-C9   | 122.5(7) | N2-C10-H10  | 118.7    |
| C9-C10-H10  | 118.7    | N3-C11-C12  | 121.7(7) |
| N3-C11-H11  | 119.1    | C12-C11-H11 | 119.1    |
| C13-C12-C11 | 119.2(7) | C13-C12-H12 | 120.4    |
| C11-C12-H12 | 120.4    | C12-C13-C14 | 119.1(7) |
| C12-C13-H13 | 120.4    | C14-C13-H13 | 120.4    |
| C15-C14-C13 | 119.3(7) | C15-C14-H14 | 120.3    |
| C13-C14-H14 | 120.3    | N3-C15-C14  | 121.0(7) |
| N3-C15-C16  | 115.0(6) | C14-C15-C16 | 124.0(6) |
| N4-C16-C17  | 121.6(7) | N4-C16-C15  | 114.7(6) |
| C17-C16-C15 | 123.7(7) | C18-C17-C16 | 119.3(7) |
| C18-C17-H17 | 120.3    | C16-C17-H17 | 120.3    |
| C17-C18-C19 | 119.8(7) | C17-C18-H18 | 120.1    |
| C19-C18-H18 | 120.1    | C20-C19-C18 | 117.6(7) |
| C20-C19-H19 | 121.2    | C18-C19-H19 | 121.2    |
| N4-C20-C19  | 123.5(7) | N4-C20-H20  | 118.2    |
| C19-C20-H20 | 118.2    | N5-C21-C22  | 122.4(8) |
| N5-C21-H21  | 118.8    | C22-C21-H21 | 118.8    |

|             |          |             |          |
|-------------|----------|-------------|----------|
| C21-C22-C23 | 118.5(9) | C21-C22-H22 | 120.7    |
| C23-C22-H22 | 120.7    | C24-C23-C22 | 119.4(8) |
| C24-C23-H23 | 120.3    | C22-C23-H23 | 120.3    |
| C23-C24-C25 | 119.1(8) | C23-C24-H24 | 120.4    |
| C25-C24-H24 | 120.4    | N5-C25-C24  | 121.3(8) |
| N5-C25-C26  | 115.0(7) | C24-C25-C26 | 123.7(7) |
| N6-C26-C27  | 121.0(7) | N6-C26-C25  | 114.8(6) |
| C27-C26-C25 | 124.2(7) | C26-C27-C28 | 118.9(8) |
| C26-C27-H27 | 120.6    | C28-C27-H27 | 120.6    |
| C29-C28-C27 | 119.7(8) | C29-C28-H28 | 120.1    |
| C27-C28-H28 | 120.1    | C28-C29-C30 | 118.2(8) |
| C28-C29-H29 | 120.9    | C30-C29-H29 | 120.9    |
| N6-C30-C29  | 122.8(8) | N6-C30-H30  | 118.6    |
| C29-C30-H30 | 118.6    | N7-C31-C32  | 122.3(7) |
| N7-C31-H31  | 118.8    | C32-C31-H31 | 118.8    |
| C33-C32-C31 | 118.6(7) | C33-C32-H32 | 120.7    |
| C31-C32-H32 | 120.7    | C32-C33-C34 | 119.5(7) |
| C32-C33-H33 | 120.2    | C34-C33-H33 | 120.2    |
| C35-C34-C33 | 118.7(7) | C35-C34-H34 | 120.7    |
| C33-C34-H34 | 120.7    | N7-C35-C34  | 121.9(7) |
| N7-C35-C36  | 114.4(6) | C34-C35-C36 | 123.7(6) |
| N8-C36-C37  | 121.5(7) | N8-C36-C35  | 115.1(6) |

|               |          |               |          |
|---------------|----------|---------------|----------|
| C37-C36-C35   | 123.4(6) | C38-C37-C36   | 119.4(7) |
| C38-C37-H37   | 120.3    | C36-C37-H37   | 120.3    |
| C37-C38-C39   | 119.1(7) | C37-C38-H38   | 120.4    |
| C39-C38-H38   | 120.4    | C40-C39-C38   | 118.7(7) |
| C40-C39-H39   | 120.6    | C38-C39-H39   | 120.6    |
| N8-C40-C39    | 122.1(7) | N8-C40-H40    | 119.0    |
| C39-C40-H40   | 119.0    | C42-C41-P1    | 111.8(5) |
| C42-C41-H41A  | 109.3    | P1-C41-H41A   | 109.3    |
| C42-C41-H41B  | 109.3    | P1-C41-H41B   | 109.3    |
| H41A-C41-H41B | 107.9    | C44-C42-C43   | 118.6(7) |
| C44-C42-C41   | 121.0(7) | C43-C42-C41   | 120.3(6) |
| C44-C43-C42   | 119.8(7) | C44-C43-H43   | 120.1    |
| C42-C43-H43   | 120.1    | C42-C44-C43   | 121.6(7) |
| C42-C44-H44   | 119.2    | C43-C44-H44   | 119.2    |
| C46-C45-P2    | 118.7(5) | C46-C45-H45A  | 107.6    |
| P2-C45-H45A   | 107.7    | C46-C45-H45B  | 107.6    |
| P2-C45-H45B   | 107.6    | H45A-C45-H45B | 107.1    |
| C48-C46-C47   | 117.2(6) | C48-C46-C45   | 122.2(6) |
| C47-C46-C45   | 120.5(6) | C48-C47-C46   | 121.3(7) |
| C48-C47-H47   | 119.4    | C46-C47-H47   | 119.4    |
| C47-C48-C46   | 121.5(7) | C47-C48-H48   | 119.3    |
| C46-C48-H48   | 119.3    |               |          |

**Table S38.** Torsion angles (°) for  $[\{\text{Cu}(2,2\text{-bpy})_2\}_2\text{Mo}_5\text{O}_{15}(1,4\text{-O}_3\text{PC}_8\text{H}_8\text{PO}_3)] \cdot 6\text{H}_2\text{O} (5 \cdot 6\text{H}_2\text{O})$ .

|                 |           |                 |           |
|-----------------|-----------|-----------------|-----------|
| O9-P1-O4-Mo1    | -63.0(4)  | O17-P1-O4-Mo1   | 60.2(4)   |
| C41-P1-O4-Mo1   | 177.0(3)  | O6-Mo2-O7-Cu1   | -7.3(4)   |
| O3-Mo2-O7-Cu1   | 95.1(3)   | O8-Mo2-O7-Cu1   | -106.9(3) |
| O21-Mo2-O7-Cu1  | 159.2(4)  | O9-Mo2-O7-Cu1   | -177.2(3) |
| O4-P1-O9-Mo3    | 152.6(3)  | O17-P1-O9-Mo3   | 30.6(4)   |
| C41-P1-O9-Mo3   | -86.6(4)  | O4-P1-O9-Mo2    | 26.8(4)   |
| O17-P1-O9-Mo2   | -95.2(3)  | C41-P1-O9-Mo2   | 147.5(3)  |
| O20-P2-O13-Mo3  | 152.6(3)  | O21-P2-O13-Mo3  | 30.0(4)   |
| C45-P2-O13-Mo3  | -87.5(4)  | O20-P2-O13-Mo4  | 26.2(4)   |
| O21-P2-O13-Mo4  | -96.4(3)  | C45-P2-O13-Mo4  | 146.1(3)  |
| O14-Mo4-O15-Cu2 | -6.7(4)   | O16-Mo4-O15-Cu2 | 96.1(3)   |
| O12-Mo4-O15-Cu2 | -106.7(3) | O17-Mo4-O15-Cu2 | 158.7(4)  |
| O13-Mo4-O15-Cu2 | -177.9(3) | O14-Mo4-O16-Mo5 | -97.9(3)  |
| O15-Mo4-O16-Mo5 | 156.1(3)  | O12-Mo4-O16-Mo5 | 30.9(6)   |
| O17-Mo4-O16-Mo5 | -3.3(2)   | O13-Mo4-O16-Mo5 | 70.6(3)   |
| O4-P1-O17-Mo4   | -172.0(3) | O9-P1-O17-Mo4   | -48.9(4)  |
| C41-P1-O17-Mo4  | 69.4(4)   | O4-P1-O17-Mo5   | -8.3(4)   |
| O9-P1-O17-Mo5   | 114.8(4)  | C41-P1-O17-Mo5  | -126.9(4) |
| O21-P2-O20-Mo5  | 65.7(3)   | O13-P2-O20-Mo5  | -57.6(3)  |
| C45-P2-O20-Mo5  | -174.3(3) | O20-P2-O21-Mo2  | -171.5(3) |
| O13-P2-O21-Mo2  | -47.2(4)  | C45-P2-O21-Mo2  | 67.8(4)   |

|                 |           |                 |           |
|-----------------|-----------|-----------------|-----------|
| O20-P2-O21-Mo1  | -11.8(4)  | O13-P2-O21-Mo1  | 112.5(3)  |
| C45-P2-O21-Mo1  | -132.5(3) | C5-N1-C1-C2     | -0.3(11)  |
| Cu1-N1-C1-C2    | -174.6(6) | N1-C1-C2-C3     | 0.5(12)   |
| C1-C2-C3-C4     | -0.4(11)  | C2-C3-C4-C5     | 0.1(10)   |
| C1-N1-C5-C4     | -0.1(10)  | Cu1-N1-C5-C4    | 175.1(5)  |
| C1-N1-C5-C6     | -179.2(6) | Cu1-N1-C5-C6    | -4.0(7)   |
| C3-C4-C5-N1     | 0.1(10)   | C3-C4-C5-C6     | 179.2(6)  |
| C10-N2-C6-C7    | -1.4(10)  | Cu1-N2-C6-C7    | 178.2(5)  |
| C10-N2-C6-C5    | 178.3(6)  | Cu1-N2-C6-C5    | -2.0(7)   |
| N1-C5-C6-N2     | 4.1(8)    | C4-C5-C6-N2     | -175.0(6) |
| N1-C5-C6-C7     | -176.2(6) | C4-C5-C6-C7     | 4.7(10)   |
| N2-C6-C7-C8     | 3.8(10)   | C5-C6-C7-C8     | -175.9(6) |
| C6-C7-C8-C9     | -2.7(10)  | C7-C8-C9-C10    | -0.5(11)  |
| C6-N2-C10-C9    | -2.0(11)  | Cu1-N2-C10-C9   | 178.3(6)  |
| C8-C9-C10-N2    | 3.0(12)   | C15-N3-C11-C12  | -1.3(11)  |
| Cu1-N3-C11-C12  | 178.0(6)  | N3-C11-C12-C13  | -0.1(12)  |
| C11-C12-C13-C14 | 0.0(11)   | C12-C13-C14-C15 | 1.5(11)   |
| C11-N3-C15-C14  | 2.9(10)   | Cu1-N3-C15-C14  | -176.6(5) |
| C11-N3-C15-C16  | -176.0(6) | Cu1-N3-C15-C16  | 4.6(8)    |
| C13-C14-C15-N3  | -2.9(11)  | C13-C14-C15-C16 | 175.8(7)  |
| C20-N4-C16-C17  | 2.0(10)   | Cu1-N4-C16-C17  | -177.1(5) |
| C20-N4-C16-C15  | -177.8(6) | Cu1-N4-C16-C15  | 3.1(7)    |

|                 |           |                 |           |
|-----------------|-----------|-----------------|-----------|
| N3-C15-C16-N4   | -5.1(9)   | C14-C15-C16-N4  | 176.2(6)  |
| N3-C15-C16-C17  | 175.1(7)  | C14-C15-C16-C17 | -3.7(11)  |
| N4-C16-C17-C18  | -2.9(11)  | C15-C16-C17-C18 | 176.9(7)  |
| C16-C17-C18-C19 | 1.6(11)   | C17-C18-C19-C20 | 0.4(10)   |
| C16-N4-C20-C19  | 0.1(11)   | Cu1-N4-C20-C19  | 179.0(5)  |
| C18-C19-C20-N4  | -1.3(11)  | C25-N5-C21-C22  | -1.7(14)  |
| Cu2-N5-C21-C22  | -176.8(7) | N5-C21-C22-C23  | 0.9(15)   |
| C21-C22-C23-C24 | 0.5(15)   | C22-C23-C24-C25 | -1.1(14)  |
| C21-N5-C25-C24  | 1.1(12)   | Cu2-N5-C25-C24  | 176.8(6)  |
| C21-N5-C25-C26  | -178.6(7) | Cu2-N5-C25-C26  | -2.9(8)   |
| C23-C24-C25-N5  | 0.3(12)   | C23-C24-C25-C26 | 179.9(8)  |
| C30-N6-C26-C27  | 2.4(10)   | Cu2-N6-C26-C27  | 175.9(6)  |
| C30-N6-C26-C25  | -176.6(6) | Cu2-N6-C26-C25  | -3.0(8)   |
| N5-C25-C26-N6   | 3.9(9)    | C24-C25-C26-N6  | -175.7(7) |
| N5-C25-C26-C27  | -175.0(7) | C24-C25-C26-C27 | 5.4(12)   |
| N6-C26-C27-C28  | -2.1(12)  | C25-C26-C27-C28 | 176.7(7)  |
| C26-C27-C28-C29 | 0.9(13)   | C27-C28-C29-C30 | 0.0(13)   |
| C26-N6-C30-C29  | -1.5(11)  | Cu2-N6-C30-C29  | -174.2(6) |
| C28-C29-C30-N6  | 0.3(12)   | C35-N7-C31-C32  | 0.9(10)   |
| Cu2-N7-C31-C32  | -165.2(6) | N7-C31-C32-C33  | 2.4(11)   |
| C31-C32-C33-C34 | -3.4(11)  | C32-C33-C34-C35 | 1.3(11)   |
| C31-N7-C35-C34  | -3.3(10)  | Cu2-N7-C35-C34  | 164.7(5)  |



|                 |           |                 |           |
|-----------------|-----------|-----------------|-----------|
| C31-N7-C35-C36  | 177.3(6)  | Cu2-N7-C35-C36  | -14.7(7)  |
| C33-C34-C35-N7  | 2.2(10)   | C33-C34-C35-C36 | -178.4(6) |
| C40-N8-C36-C37  | 1.3(10)   | Cu2-N8-C36-C37  | 177.0(5)  |
| C40-N8-C36-C35  | -178.2(6) | Cu2-N8-C36-C35  | -2.5(8)   |
| N7-C35-C36-N8   | 11.7(9)   | C34-C35-C36-N8  | -167.8(6) |
| N7-C35-C36-C37  | -167.8(7) | C34-C35-C36-C37 | 12.8(11)  |
| N8-C36-C37-C38  | 0.4(11)   | C35-C36-C37-C38 | 179.8(7)  |
| C36-C37-C38-C39 | -1.2(12)  | C37-C38-C39-C40 | 0.4(12)   |
| C36-N8-C40-C39  | -2.1(11)  | Cu2-N8-C40-C39  | -177.4(6) |
| C38-C39-C40-N8  | 1.3(12)   | O4-P1-C41-C42   | -45.2(6)  |
| O9-P1-C41-C42   | -166.8(5) | O17-P1-C41-C42  | 73.2(6)   |
| P1-C41-C42-C44  | 105.7(7)  | P1-C41-C42-C43  | -71.5(8)  |
| C44-C42-C43-C44 | -0.7(12)  | C41-C42-C43-C44 | 176.6(7)  |
| C43-C42-C44-C43 | 0.7(12)   | C41-C42-C44-C43 | -176.6(7) |
| O20-P2-C45-C46  | -54.7(6)  | O21-P2-C45-C46  | 65.5(6)   |
| O13-P2-C45-C46  | -175.9(5) | P2-C45-C46-C48  | -84.8(8)  |
| P2-C45-C46-C47  | 98.3(7)   | C48-C46-C47-C48 | -1.1(12)  |
| C45-C46-C47-C48 | 175.9(7)  | C47-C46-C48-C47 | 1.1(12)   |
| C45-C46-C48-C47 | -175.9(7) |                 |           |

**Table S39.** Anisotropic atomic displacement parameters ( $\text{\AA}^2$ ) for  $[\{\text{Cu}(2,2\text{-bpy})_2\}_2\text{Mo}_5\text{O}_{15}(1,4\text{-O}_3\text{PC}_8\text{H}_8\text{PO}_3)] \cdot 6\text{H}_2\text{O}$  (**5**·6H<sub>2</sub>O).

The anisotropic atomic displacement factor exponent takes the form:  $-2\pi^2 [ h^2 a^{*2} U_{11} + \dots + 2 h k a^* b^* U_{12} ]$

|     | $U_{11}$   | $U_{22}$  | $U_{33}$  | $U_{23}$    | $U_{13}$    | $U_{12}$   |
|-----|------------|-----------|-----------|-------------|-------------|------------|
| Mo1 | 0.0088(3)  | 0.0105(3) | 0.0170(3) | -0.0049(2)  | -0.0020(3)  | -0.0017(3) |
| Mo2 | 0.0085(3)  | 0.0075(3) | 0.0083(3) | -0.0011(2)  | 0.0001(2)   | -0.0033(2) |
| Mo3 | 0.0098(3)  | 0.0079(3) | 0.0105(3) | -0.0018(2)  | 0.0028(2)   | -0.0035(2) |
| Mo4 | 0.0156(3)  | 0.0091(3) | 0.0091(3) | -0.0022(2)  | 0.0025(2)   | -0.0058(3) |
| Mo5 | 0.0135(3)  | 0.0106(3) | 0.0139(3) | -0.0026(2)  | -0.0035(3)  | -0.0040(3) |
| Cu1 | 0.0114(4)  | 0.0079(4) | 0.0127(4) | 0.0002(3)   | -0.0010(3)  | -0.0030(4) |
| Cu2 | 0.0140(5)  | 0.0143(4) | 0.0111(4) | -0.0025(3)  | 0.0021(4)   | -0.0090(4) |
| P1  | 0.0155(10) | 0.0084(8) | 0.0084(9) | 0.0007(7)   | -0.0012(7)  | -0.0056(7) |
| P2  | 0.0090(9)  | 0.0084(8) | 0.0083(9) | -0.0009(7)  | 0.0010(7)   | -0.0038(7) |
| O1  | 0.014(3)   | 0.017(3)  | 0.025(3)  | -0.011(2)   | 0.004(2)    | -0.007(2)  |
| O2  | 0.016(3)   | 0.011(2)  | 0.025(3)  | -0.004(2)   | -0.006(2)   | 0.000(2)   |
| O3  | 0.013(3)   | 0.008(2)  | 0.010(2)  | -0.0019(19) | -0.001(2)   | -0.003(2)  |
| O4  | 0.023(3)   | 0.009(2)  | 0.010(2)  | -0.0003(19) | 0.001(2)    | -0.008(2)  |
| O5  | 0.011(3)   | 0.015(2)  | 0.022(3)  | -0.009(2)   | -0.001(2)   | -0.005(2)  |
| O6  | 0.014(3)   | 0.013(2)  | 0.013(3)  | -0.004(2)   | 0.002(2)    | -0.006(2)  |
| O7  | 0.012(3)   | 0.012(2)  | 0.014(3)  | -0.004(2)   | 0.001(2)    | -0.006(2)  |
| O8  | 0.009(2)   | 0.009(2)  | 0.007(2)  | 0.0005(18)  | -0.0008(19) | -0.003(2)  |
| O9  | 0.011(3)   | 0.007(2)  | 0.012(2)  | 0.0025(19)  | -0.004(2)   | -0.002(2)  |

|     | <b>U<sub>11</sub></b> | <b>U<sub>22</sub></b> | <b>U<sub>33</sub></b> | <b>U<sub>23</sub></b> | <b>U<sub>13</sub></b> | <b>U<sub>12</sub></b> |
|-----|-----------------------|-----------------------|-----------------------|-----------------------|-----------------------|-----------------------|
| O10 | 0.018(3)              | 0.017(3)              | 0.016(3)              | -0.005(2)             | 0.006(2)              | -0.010(2)             |
| O11 | 0.013(3)              | 0.014(2)              | 0.017(3)              | -0.006(2)             | 0.003(2)              | -0.005(2)             |
| O12 | 0.018(3)              | 0.013(2)              | 0.013(3)              | -0.005(2)             | 0.004(2)              | -0.009(2)             |
| O13 | 0.011(2)              | 0.008(2)              | 0.009(2)              | -0.0010(18)           | 0.0012(19)            | -0.005(2)             |
| O14 | 0.024(3)              | 0.020(3)              | 0.012(3)              | -0.005(2)             | 0.003(2)              | -0.011(2)             |
| O15 | 0.015(3)              | 0.015(2)              | 0.015(3)              | -0.007(2)             | 0.006(2)              | -0.008(2)             |
| O16 | 0.014(3)              | 0.012(2)              | 0.012(3)              | -0.005(2)             | 0.001(2)              | -0.005(2)             |
| O17 | 0.016(3)              | 0.013(2)              | 0.008(2)              | -0.0034(19)           | 0.001(2)              | -0.007(2)             |
| O18 | 0.034(3)              | 0.018(3)              | 0.014(3)              | -0.001(2)             | -0.010(2)             | -0.012(3)             |
| O19 | 0.013(3)              | 0.016(3)              | 0.023(3)              | -0.002(2)             | -0.006(2)             | -0.007(2)             |
| O20 | 0.012(3)              | 0.013(2)              | 0.012(2)              | -0.002(2)             | -0.001(2)             | -0.007(2)             |
| O21 | 0.011(2)              | 0.010(2)              | 0.012(2)              | -0.0029(19)           | 0.002(2)              | -0.005(2)             |
| O90 | 0.038(5)              | 0.045(5)              | 0.085(6)              | 0.024(4)              | -0.008(4)             | -0.017(4)             |
| O91 | 0.023(4)              | 0.064(6)              | 0.082(7)              | 0.010(5)              | -0.014(4)             | 0.002(4)              |
| O92 | 0.080(6)              | 0.049(5)              | 0.075(6)              | 0.003(5)              | 0.032(5)              | -0.024(5)             |
| N1  | 0.013(3)              | 0.008(3)              | 0.019(3)              | -0.005(2)             | 0.003(3)              | -0.004(3)             |
| N2  | 0.011(3)              | 0.013(3)              | 0.015(3)              | -0.003(2)             | -0.001(2)             | -0.007(3)             |
| N3  | 0.013(3)              | 0.012(3)              | 0.013(3)              | 0.001(2)              | -0.001(2)             | -0.004(3)             |
| N4  | 0.013(3)              | 0.012(3)              | 0.013(3)              | -0.002(2)             | -0.001(2)             | -0.005(3)             |
| N5  | 0.023(4)              | 0.029(4)              | 0.011(3)              | -0.002(3)             | 0.003(3)              | -0.016(3)             |
| N6  | 0.015(3)              | 0.011(3)              | 0.020(3)              | -0.003(3)             | 0.000(3)              | -0.005(3)             |

|     | <b>U<sub>11</sub></b> | <b>U<sub>22</sub></b> | <b>U<sub>33</sub></b> | <b>U<sub>23</sub></b> | <b>U<sub>13</sub></b> | <b>U<sub>12</sub></b> |
|-----|-----------------------|-----------------------|-----------------------|-----------------------|-----------------------|-----------------------|
| N7  | 0.017(3)              | 0.017(3)              | 0.010(3)              | -0.005(2)             | 0.003(3)              | -0.011(3)             |
| N8  | 0.020(3)              | 0.022(3)              | 0.008(3)              | -0.006(3)             | 0.003(3)              | -0.014(3)             |
| C1  | 0.012(4)              | 0.013(4)              | 0.021(4)              | 0.001(3)              | -0.006(3)             | -0.001(3)             |
| C2  | 0.013(4)              | 0.020(4)              | 0.024(4)              | -0.003(3)             | -0.003(3)             | -0.007(3)             |
| C3  | 0.019(4)              | 0.017(4)              | 0.020(4)              | -0.007(3)             | 0.004(3)              | -0.011(3)             |
| C4  | 0.018(4)              | 0.015(4)              | 0.011(4)              | -0.002(3)             | 0.000(3)              | -0.010(3)             |
| C5  | 0.015(4)              | 0.015(4)              | 0.006(3)              | -0.006(3)             | 0.003(3)              | -0.006(3)             |
| C6  | 0.013(4)              | 0.010(3)              | 0.005(3)              | -0.003(3)             | -0.001(3)             | -0.004(3)             |
| C7  | 0.022(4)              | 0.011(3)              | 0.012(4)              | -0.003(3)             | 0.001(3)              | -0.008(3)             |
| C8  | 0.010(4)              | 0.009(3)              | 0.021(4)              | -0.005(3)             | 0.002(3)              | 0.000(3)              |
| C9  | 0.017(4)              | 0.015(4)              | 0.022(4)              | -0.003(3)             | -0.002(3)             | -0.007(3)             |
| C10 | 0.018(4)              | 0.017(4)              | 0.020(4)              | 0.002(3)              | 0.001(3)              | -0.012(3)             |
| C11 | 0.022(4)              | 0.015(4)              | 0.013(4)              | -0.001(3)             | 0.001(3)              | -0.005(3)             |
| C12 | 0.013(4)              | 0.014(4)              | 0.017(4)              | -0.002(3)             | 0.001(3)              | -0.003(3)             |
| C13 | 0.019(4)              | 0.014(4)              | 0.023(4)              | 0.005(3)              | -0.010(3)             | -0.006(3)             |
| C14 | 0.020(4)              | 0.017(4)              | 0.014(4)              | 0.002(3)              | -0.002(3)             | -0.013(3)             |
| C15 | 0.022(4)              | 0.012(3)              | 0.013(4)              | -0.001(3)             | 0.000(3)              | -0.012(3)             |
| C16 | 0.015(4)              | 0.014(4)              | 0.018(4)              | -0.004(3)             | -0.002(3)             | -0.010(3)             |
| C17 | 0.022(4)              | 0.022(4)              | 0.017(4)              | -0.003(3)             | 0.005(3)              | -0.017(3)             |
| C18 | 0.025(4)              | 0.033(4)              | 0.009(4)              | -0.006(3)             | 0.003(3)              | -0.024(4)             |
| C19 | 0.019(4)              | 0.030(4)              | 0.022(4)              | -0.015(4)             | 0.004(3)              | -0.015(4)             |

|     | <b>U<sub>11</sub></b> | <b>U<sub>22</sub></b> | <b>U<sub>33</sub></b> | <b>U<sub>23</sub></b> | <b>U<sub>13</sub></b> | <b>U<sub>12</sub></b> |
|-----|-----------------------|-----------------------|-----------------------|-----------------------|-----------------------|-----------------------|
| C20 | 0.014(4)              | 0.019(4)              | 0.019(4)              | -0.004(3)             | -0.001(3)             | -0.008(3)             |
| C21 | 0.043(6)              | 0.056(6)              | 0.016(4)              | -0.010(4)             | 0.006(4)              | -0.037(5)             |
| C22 | 0.043(6)              | 0.071(7)              | 0.010(4)              | -0.008(4)             | 0.004(4)              | -0.034(6)             |
| C23 | 0.052(6)              | 0.048(6)              | 0.016(4)              | -0.002(4)             | 0.003(4)              | -0.029(5)             |
| C24 | 0.028(5)              | 0.028(4)              | 0.018(4)              | -0.002(3)             | 0.008(4)              | -0.012(4)             |
| C25 | 0.018(4)              | 0.017(4)              | 0.024(4)              | -0.004(3)             | 0.005(3)              | -0.008(3)             |
| C26 | 0.018(4)              | 0.009(3)              | 0.021(4)              | 0.000(3)              | 0.004(3)              | -0.004(3)             |
| C27 | 0.020(4)              | 0.028(4)              | 0.031(5)              | 0.001(4)              | 0.007(4)              | -0.013(4)             |
| C28 | 0.025(5)              | 0.037(5)              | 0.046(6)              | 0.005(4)              | -0.002(4)             | -0.023(4)             |
| C29 | 0.022(5)              | 0.033(5)              | 0.043(6)              | -0.002(4)             | -0.007(4)             | -0.016(4)             |
| C30 | 0.015(4)              | 0.019(4)              | 0.025(4)              | -0.003(3)             | 0.000(3)              | -0.008(3)             |
| C31 | 0.018(4)              | 0.020(4)              | 0.016(4)              | -0.003(3)             | 0.001(3)              | -0.012(3)             |
| C32 | 0.014(4)              | 0.021(4)              | 0.023(4)              | -0.009(3)             | 0.002(3)              | -0.007(3)             |
| C33 | 0.030(5)              | 0.016(4)              | 0.013(4)              | -0.002(3)             | 0.002(3)              | -0.012(4)             |
| C34 | 0.023(4)              | 0.020(4)              | 0.011(4)              | -0.006(3)             | 0.009(3)              | -0.017(3)             |
| C35 | 0.014(4)              | 0.020(4)              | 0.009(3)              | -0.009(3)             | 0.003(3)              | -0.008(3)             |
| C36 | 0.018(4)              | 0.016(4)              | 0.012(4)              | -0.006(3)             | 0.004(3)              | -0.011(3)             |
| C37 | 0.022(4)              | 0.021(4)              | 0.024(4)              | -0.010(3)             | 0.002(3)              | -0.013(4)             |
| C38 | 0.024(5)              | 0.034(5)              | 0.025(4)              | -0.009(4)             | 0.007(4)              | -0.021(4)             |
| C39 | 0.014(4)              | 0.024(4)              | 0.027(4)              | -0.009(3)             | -0.003(3)             | -0.009(3)             |
| C40 | 0.018(4)              | 0.017(4)              | 0.019(4)              | -0.005(3)             | 0.001(3)              | -0.008(3)             |

|     | <b>U<sub>11</sub></b> | <b>U<sub>22</sub></b> | <b>U<sub>33</sub></b> | <b>U<sub>23</sub></b> | <b>U<sub>13</sub></b> | <b>U<sub>12</sub></b> |
|-----|-----------------------|-----------------------|-----------------------|-----------------------|-----------------------|-----------------------|
| C41 | 0.018(4)              | 0.015(4)              | 0.012(4)              | 0.001(3)              | -0.001(3)             | -0.006(3)             |
| C42 | 0.022(4)              | 0.018(4)              | 0.005(3)              | -0.001(3)             | 0.002(3)              | -0.007(3)             |
| C43 | 0.039(5)              | 0.010(3)              | 0.013(4)              | -0.002(3)             | -0.003(4)             | -0.011(4)             |
| C44 | 0.035(5)              | 0.019(4)              | 0.008(4)              | -0.005(3)             | 0.003(3)              | -0.015(4)             |
| C45 | 0.013(4)              | 0.013(3)              | 0.007(3)              | 0.002(3)              | 0.000(3)              | -0.006(3)             |
| C46 | 0.010(4)              | 0.011(3)              | 0.011(3)              | 0.000(3)              | -0.004(3)             | -0.003(3)             |
| C47 | 0.022(4)              | 0.017(4)              | 0.015(4)              | -0.008(3)             | 0.003(3)              | -0.008(3)             |
| C48 | 0.020(4)              | 0.015(4)              | 0.023(4)              | -0.005(3)             | 0.003(3)              | -0.012(3)             |

**Table S40.** Hydrogen atomic coordinates and isotropic atomic displacement parameters ( $\text{\AA}^2$ ) for  $[\{\text{Cu}(2,2\text{-bpy})_2\}_2\text{Mo}_5\text{O}_{15}(1,4\text{-O}_3\text{PC}_8\text{H}_8\text{PO}_3)] \cdot 6\text{H}_2\text{O}$  (**5**·6H<sub>2</sub>O).

|      | <b>x/a</b> | <b>y/b</b> | <b>z/c</b> | <b>U(eq)</b> |
|------|------------|------------|------------|--------------|
| H90A | 0.789(11)  | 0.763(8)   | 0.395(5)   | 0.077        |
| H90B | 0.829(7)   | 0.640(6)   | 0.435(6)   | 0.077        |
| H91A | 0.743(12)  | 0.465(10)  | 0.271(6)   | 0.085        |
| H91B | 0.647(3)   | 0.456(11)  | 0.285(6)   | 0.085        |
| H92A | 0.800(12)  | 0.620(8)   | 0.351(7)   | 0.092        |
| H92B | 0.792(13)  | 0.499(5)   | 0.345(7)   | 0.092        |
| H1   | 0.5794     | 0.8770     | 0.4063     | 0.022        |
| H2   | 0.6761     | 0.9891     | 0.3851     | 0.024        |
| H3   | 0.5713     | 1.1947     | 0.3346     | 0.02         |
| H4   | 0.3699     | 1.2817     | 0.3051     | 0.016        |
| H7   | 0.1870     | 1.3431     | 0.2732     | 0.018        |
| H8   | -0.0146    | 1.4044     | 0.2607     | 0.018        |
| H9   | -0.0769    | 1.2596     | 0.3010     | 0.022        |
| H10  | 0.0608     | 1.0641     | 0.3493     | 0.021        |
| H11  | 0.5398     | 0.7079     | 0.3643     | 0.023        |
| H12  | 0.6754     | 0.5199     | 0.4254     | 0.02         |
| H13  | 0.6499     | 0.4653     | 0.5370     | 0.024        |
| H14  | 0.4879     | 0.6030     | 0.5857     | 0.02         |
| H17  | 0.3143     | 0.7273     | 0.6192     | 0.022        |

|      | <b>x/a</b> | <b>y/b</b> | <b>z/c</b> | <b>U(eq)</b> |
|------|------------|------------|------------|--------------|
| H18  | 0.1462     | 0.8816     | 0.6511     | 0.022        |
| H19  | 0.0384     | 1.0667     | 0.5746     | 0.025        |
| H20  | 0.1046     | 1.0874     | 0.4686     | 0.021        |
| H21  | 0.2519     | 0.2638     | 0.0019     | 0.04         |
| H22  | 0.2608     | 0.3165     | -0.1107    | 0.047        |
| H23  | 0.4034     | 0.3710     | -0.1542    | 0.046        |
| H24  | 0.5342     | 0.3680     | -0.0826    | 0.031        |
| H27  | 0.6409     | 0.3736     | -0.0085    | 0.034        |
| H28  | 0.7469     | 0.3710     | 0.0780     | 0.042        |
| H29  | 0.7097     | 0.3049     | 0.1867     | 0.038        |
| H30  | 0.5666     | 0.2450     | 0.2061     | 0.024        |
| H31  | 0.6268     | 0.0307     | 0.2014     | 0.02         |
| H32  | 0.7031     | -0.1738    | 0.2495     | 0.024        |
| H33  | 0.5821     | -0.2611    | 0.2541     | 0.024        |
| H34  | 0.3811     | -0.1363    | 0.2201     | 0.018        |
| H37  | 0.1916     | 0.0011     | 0.2085     | 0.024        |
| H38  | -0.0003    | 0.1487     | 0.1702     | 0.03         |
| H39  | -0.0351    | 0.3413     | 0.1114     | 0.025        |
| H40  | 0.1228     | 0.3789     | 0.0925     | 0.022        |
| H41A | 0.2264     | 0.9040     | 0.1074     | 0.019        |
| H41B | 0.2528     | 0.7837     | 0.0862     | 0.019        |



|      | <b>x/a</b> | <b>y/b</b> | <b>z/c</b> | <b>U(eq)</b> |
|------|------------|------------|------------|--------------|
| H43  | 0.0753     | 0.7914     | 0.0319     | 0.025        |
| H44  | 0.0808     | 1.0916     | 0.0453     | 0.024        |
| H45A | 0.2006     | 0.3857     | 0.3900     | 0.014        |
| H45B | 0.2360     | 0.4726     | 0.4127     | 0.014        |
| H47  | 0.0352     | 0.3642     | 0.4352     | 0.021        |
| H48  | 0.0922     | 0.6183     | 0.4794     | 0.021        |

**Table S41.** Sample and crystal data for  $[\{\text{Cu}(\text{o-phen})(\text{H}_2\text{O})_2\}_2\text{Mo}_5\text{O}_{15}(1,4\text{-O}_3\text{PC}_8\text{H}_8\text{PO}_3)]\cdot 4\text{H}_2\text{O}$  ( $6\cdot 4\text{H}_2\text{O}$ ).

|                        |                                                                                                                                                           |                            |
|------------------------|-----------------------------------------------------------------------------------------------------------------------------------------------------------|----------------------------|
| Identification code    | $[\{\text{Cu}(\text{o-phen})(\text{H}_2\text{O})_2\}_2\text{Mo}_5\text{O}_{15}(1,4\text{-O}_3\text{PC}_8\text{H}_8\text{PO}_3)]\cdot 4\text{H}_2\text{O}$ |                            |
| Chemical formula       | $\text{C}_{32}\text{H}_{40}\text{Cu}_2\text{Mo}_5\text{N}_4\text{O}_{29}\text{P}_2$                                                                       |                            |
| Formula weight         | 1613.40                                                                                                                                                   |                            |
| Temperature            | 90(2) K                                                                                                                                                   |                            |
| Wavelength             | 0.71073 Å                                                                                                                                                 |                            |
| Crystal size           | 0.127 x 0.147 x 0.332 mm                                                                                                                                  |                            |
| Crystal system         | Monoclinic                                                                                                                                                |                            |
| Space group            | P21/c                                                                                                                                                     |                            |
| Unit cell dimensions   | $a = 13.4404(14)$ Å                                                                                                                                       | $\alpha = 90^\circ$        |
|                        | $b = 21.237(2)$ Å                                                                                                                                         | $\beta = 118.357(6)^\circ$ |
|                        | $c = 18.1894(14)$ Å                                                                                                                                       | $\gamma = 90^\circ$        |
| Volume                 | $4568.9(8)$ Å <sup>3</sup>                                                                                                                                |                            |
| Z                      | 4                                                                                                                                                         |                            |
| Density (calculated)   | $2.346$ g/cm <sup>3</sup>                                                                                                                                 |                            |
| Absorption coefficient | $2.416$ mm <sup>-1</sup>                                                                                                                                  |                            |
| F(000)                 | 3160                                                                                                                                                      |                            |

**Table S42.** Data collection and structure refinement for [ $\{\text{Cu}(\text{o-phen})(\text{H}_2\text{O})_2\}_2\text{Mo}_5\text{O}_{15}(\text{1,4-O}_3\text{PC}_8\text{H}_8\text{PO}_3)] \cdot 4\text{H}_2\text{O}$  (**6**·4H<sub>2</sub>O).

|                                     |                                                                                                                 |
|-------------------------------------|-----------------------------------------------------------------------------------------------------------------|
| Theta range for data collection     | 1.72 to 34.16°                                                                                                  |
| Index ranges                        | -21 ≤ h ≤ 21, -29 ≤ k ≤ 32, -28 ≤ l ≤ 28                                                                        |
| Reflections collected               | 86173                                                                                                           |
| Independent reflections             | 17963 [R(int) = 0.0355]                                                                                         |
| Coverage of independent reflections | 95.1%                                                                                                           |
| Max. and min. transmission          | 0.7490 and 0.5010                                                                                               |
| Structure solution technique        | direct methods                                                                                                  |
| Structure solution program          | SHELXS-97 (Sheldrick, 2008)                                                                                     |
| Refinement method                   | Full-matrix least-squares on F <sup>2</sup>                                                                     |
| Refinement program                  | SHELXL-2013 (Sheldrick, 2013)                                                                                   |
| Function minimized                  | $\Sigma w(F_o^2 - F_c^2)^2$                                                                                     |
| Data / restraints / parameters      | 17963 / 14 / 715                                                                                                |
| Goodness-of-fit on F <sup>2</sup>   | 1.108                                                                                                           |
| $\Delta/\sigma_{\text{max}}$        | 0.004                                                                                                           |
| Final R indices                     | 14688 data; I > 2σ(I)      R1 = 0.0350, wR2 = 0.0743<br>all data                      R1 = 0.0505, wR2 = 0.0822 |
| Weighting scheme                    | $w=1/[\sigma^2(F_o^2)+(0.0198P)^2+21.3187P]$<br>where $P=(F_o^2+2F_c^2)/3$                                      |
| Largest diff. peak and hole         | 1.875 and -1.210 eÅ <sup>-3</sup>                                                                               |
| R.M.S. deviation from mean          | 0.178 eÅ <sup>-3</sup>                                                                                          |

**Table S43.** Atomic coordinates and equivalent isotropic atomic displacement parameters ( $\text{\AA}^2$ ) for  $[\{\text{Cu}(\text{o-phen})(\text{H}_2\text{O})_2\}_2\text{Mo}_5\text{O}_{15}(1,4\text{-O}_3\text{PC}_8\text{H}_8\text{PO}_3)]\cdot 4\text{H}_2\text{O}$  (**6**·4H<sub>2</sub>O).

U(eq) is defined as one third of the trace of the orthogonalized  $U_{ij}$  tensor.

|     | <b>x/a</b>  | <b>y/b</b>  | <b>z/c</b>  | <b>U(eq)</b> |
|-----|-------------|-------------|-------------|--------------|
| Mo1 | 0.25011(2)  | 0.71780(2)  | 0.88020(2)  | 0.00818(4)   |
| Mo2 | 0.32390(2)  | 0.63808(2)  | 0.75412(2)  | 0.00868(4)   |
| Mo3 | 0.10166(2)  | 0.55259(2)  | 0.61561(2)  | 0.00798(4)   |
| Mo4 | 0.87314(2)  | 0.59728(2)  | 0.63040(2)  | 0.00813(4)   |
| Mo5 | 0.98604(2)  | 0.67466(2)  | 0.83768(2)  | 0.00787(4)   |
| Cu1 | 0.82358(3)  | 0.81329(2)  | 0.82056(2)  | 0.01037(6)   |
| Cu2 | 0.73862(3)  | 0.45654(2)  | 0.64505(2)  | 0.01020(6)   |
| P1  | 0.05749(6)  | 0.70785(3)  | 0.67279(4)  | 0.00787(11)  |
| P2  | 0.85937(6)  | 0.06728(3)  | 0.68598(4)  | 0.00746(11)  |
| O1  | 0.13779(16) | 0.69560(10) | 0.91600(12) | 0.0089(3)    |
| O2  | 0.23915(18) | 0.79772(10) | 0.88380(14) | 0.0127(4)    |
| O3  | 0.36770(17) | 0.70083(10) | 0.97281(13) | 0.0122(4)    |
| O4  | 0.30727(17) | 0.71478(10) | 0.80218(13) | 0.0106(4)    |
| O5  | 0.08426(16) | 0.70744(10) | 0.76547(12) | 0.0097(3)    |
| O6  | 0.45059(17) | 0.61062(11) | 0.83144(14) | 0.0141(4)    |
| O7  | 0.35760(18) | 0.66741(11) | 0.68094(14) | 0.0152(4)    |
| O8  | 0.25296(16) | 0.56045(10) | 0.70544(12) | 0.0098(3)    |
| O9  | 0.13679(16) | 0.66277(10) | 0.65799(12) | 0.0092(3)    |

|     | <b>x/a</b>  | <b>y/b</b>  | <b>z/c</b>  | <b>U(eq)</b> |
|-----|-------------|-------------|-------------|--------------|
| O10 | 0.12548(17) | 0.56748(10) | 0.53275(13) | 0.0118(4)    |
| O11 | 0.08975(17) | 0.47286(10) | 0.61600(13) | 0.0123(4)    |
| O12 | 0.94230(16) | 0.57670(10) | 0.56471(12) | 0.0097(3)    |
| O13 | 0.84219(17) | 0.52125(10) | 0.65185(13) | 0.0123(4)    |
| O14 | 0.74263(17) | 0.62150(11) | 0.55812(13) | 0.0135(4)    |
| O15 | 0.93416(16) | 0.69050(10) | 0.61860(12) | 0.0097(3)    |
| O16 | 0.88748(16) | 0.63637(10) | 0.73122(12) | 0.0095(3)    |
| O17 | 0.93417(18) | 0.64604(11) | 0.89938(13) | 0.0131(4)    |
| O18 | 0.92557(17) | 0.75035(10) | 0.81644(13) | 0.0111(4)    |
| O19 | 0.9422(2)   | 0.84512(13) | 0.92713(16) | 0.0225(5)    |
| O20 | 0.7712(2)   | 0.75436(14) | 0.90043(19) | 0.0259(5)    |
| O21 | 0.92830(16) | 0.08313(10) | 0.64258(12) | 0.0092(3)    |
| O22 | 0.93884(16) | 0.06640(10) | 0.78116(12) | 0.0087(3)    |
| O23 | 0.76055(16) | 0.11392(10) | 0.66258(13) | 0.0095(3)    |
| O24 | 0.74350(19) | 0.41630(11) | 0.54727(14) | 0.0145(4)    |
| O25 | 0.5922(2)   | 0.52392(15) | 0.5789(2)   | 0.0396(8)    |
| O90 | 0.6724(2)   | 0.86250(17) | 0.3564(2)   | 0.0344(7)    |
| O91 | 0.6545(2)   | 0.87676(15) | 0.19520(19) | 0.0270(6)    |
| O92 | 0.5231(2)   | 0.30168(14) | 0.40767(17) | 0.0228(5)    |
| O93 | 0.1520(2)   | 0.69726(12) | 0.50521(15) | 0.0172(4)    |
| N1  | 0.7126(2)   | 0.87998(12) | 0.81167(16) | 0.0119(4)    |

|     | <b>x/a</b> | <b>y/b</b>  | <b>z/c</b>  | <b>U(eq)</b> |
|-----|------------|-------------|-------------|--------------|
| N2  | 0.7327(2)  | 0.81422(12) | 0.69718(16) | 0.0122(4)    |
| N3  | 0.6314(2)  | 0.39292(12) | 0.64591(15) | 0.0110(4)    |
| N4  | 0.7799(2)  | 0.46410(12) | 0.76555(15) | 0.0112(4)    |
| C1  | 0.7042(2)  | 0.91058(15) | 0.87198(19) | 0.0149(5)    |
| C2  | 0.6239(3)  | 0.95887(15) | 0.8544(2)   | 0.0166(5)    |
| C3  | 0.5541(3)  | 0.97617(15) | 0.7735(2)   | 0.0178(6)    |
| C4  | 0.6413(2)  | 0.89567(14) | 0.73121(18) | 0.0113(5)    |
| C5  | 0.5617(2)  | 0.94485(15) | 0.7080(2)   | 0.0145(5)    |
| C6  | 0.4951(2)  | 0.95893(15) | 0.6207(2)   | 0.0169(6)    |
| C7  | 0.5062(3)  | 0.92533(16) | 0.5611(2)   | 0.0175(6)    |
| C8  | 0.5866(2)  | 0.87490(15) | 0.58402(18) | 0.0135(5)    |
| C9  | 0.6527(2)  | 0.86044(14) | 0.66888(18) | 0.0117(5)    |
| C10 | 0.7514(2)  | 0.78235(15) | 0.64178(19) | 0.0142(5)    |
| C11 | 0.6903(3)  | 0.79457(16) | 0.55578(19) | 0.0164(5)    |
| C12 | 0.6070(3)  | 0.84003(16) | 0.52659(19) | 0.0164(6)    |
| C13 | 0.5498(2)  | 0.36202(15) | 0.58267(19) | 0.0141(5)    |
| C14 | 0.4832(2)  | 0.31698(15) | 0.5948(2)   | 0.0171(6)    |
| C15 | 0.5032(2)  | 0.30180(15) | 0.6738(2)   | 0.0170(6)    |
| C16 | 0.5893(2)  | 0.33385(14) | 0.7427(2)   | 0.0138(5)    |
| C17 | 0.6486(2)  | 0.38027(14) | 0.72420(18) | 0.0113(5)    |
| C18 | 0.7301(2)  | 0.41882(14) | 0.78984(18) | 0.0112(5)    |

|     | <b>x/a</b> | <b>y/b</b>  | <b>z/c</b>  | <b>U(eq)</b> |
|-----|------------|-------------|-------------|--------------|
| C19 | 0.6174(3)  | 0.32380(15) | 0.8283(2)   | 0.0162(5)    |
| C20 | 0.6967(3)  | 0.35931(15) | 0.8906(2)   | 0.0161(5)    |
| C21 | 0.7539(2)  | 0.40943(15) | 0.87249(18) | 0.0133(5)    |
| C22 | 0.8303(3)  | 0.45163(15) | 0.93252(18) | 0.0148(5)    |
| C23 | 0.8768(3)  | 0.49905(15) | 0.90704(19) | 0.0156(5)    |
| C24 | 0.8514(2)  | 0.50342(15) | 0.82283(18) | 0.0135(5)    |
| C25 | 0.0844(2)  | 0.78609(13) | 0.64805(18) | 0.0106(5)    |
| C26 | 0.0096(2)  | 0.83855(13) | 0.65122(17) | 0.0096(4)    |
| C27 | 0.9309(2)  | 0.86740(14) | 0.57722(18) | 0.0118(5)    |
| C28 | 0.0186(2)  | 0.86041(14) | 0.72660(18) | 0.0117(5)    |
| C29 | 0.8629(2)  | 0.91633(14) | 0.57856(18) | 0.0118(5)    |
| C30 | 0.9518(2)  | 0.91007(14) | 0.72811(18) | 0.0121(5)    |
| C31 | 0.8728(2)  | 0.93855(13) | 0.65403(18) | 0.0099(4)    |
| C32 | 0.7958(2)  | 0.99082(13) | 0.65348(18) | 0.0102(5)    |

**Table S44.** Bond lengths (Å) for [ $\{\text{Cu}(\text{o-phen})(\text{H}_2\text{O})_2\}_2\text{Mo}_5\text{O}_{15}(1,4\text{-O}_3\text{PC}_8\text{H}_8\text{PO}_3)\cdot 4\text{H}_2\text{O}$  ( $6\cdot 4\text{H}_2\text{O}$ ).

|         |            |         |            |
|---------|------------|---------|------------|
| Mo1-O2  | 1.708(2)   | Mo1-O3  | 1.714(2)   |
| Mo1-O4  | 1.909(2)   | Mo1-O1  | 1.964(2)   |
| Mo1-O5  | 2.226(2)   | Mo1-O23 | 2.321(2)   |
| Mo2-O7  | 1.714(2)   | Mo2-O6  | 1.715(2)   |
| Mo2-O8  | 1.900(2)   | Mo2-O4  | 1.911(2)   |
| Mo2-O9  | 2.341(2)   | Mo2-O23 | 2.341(2)   |
| Mo3-O11 | 1.701(2)   | Mo3-O10 | 1.713(2)   |
| Mo3-O8  | 1.917(2)   | Mo3-O12 | 1.955(2)   |
| Mo3-O22 | 2.2088(19) | Mo3-O9  | 2.439(2)   |
| Mo4-O14 | 1.697(2)   | Mo4-O13 | 1.757(2)   |
| Mo4-O12 | 1.881(2)   | Mo4-O16 | 1.937(2)   |
| Mo4-O15 | 2.192(2)   | Mo4-O22 | 2.3542(19) |
| Mo5-O17 | 1.691(2)   | Mo5-O18 | 1.759(2)   |
| Mo5-O1  | 1.904(2)   | Mo5-O16 | 1.931(2)   |
| Mo5-O21 | 2.200(2)   | Mo5-O5  | 2.366(2)   |
| Cu1-O18 | 1.941(2)   | Cu1-O19 | 1.954(2)   |
| Cu1-N2  | 1.981(3)   | Cu1-N1  | 2.007(3)   |
| Cu1-O20 | 2.268(3)   | Cu2-O13 | 1.918(2)   |
| Cu2-N3  | 1.981(2)   | Cu2-N4  | 1.996(2)   |
| Cu2-O24 | 2.002(2)   | Cu2-O25 | 2.262(3)   |



|          |            |          |            |
|----------|------------|----------|------------|
| P1-O15   | 1.518(2)   | P1-O5    | 1.548(2)   |
| P1-O9    | 1.548(2)   | P1-C25   | 1.802(3)   |
| P2-O21   | 1.513(2)   | P2-O22   | 1.543(2)   |
| P2-O23   | 1.546(2)   | P2-C32   | 1.799(3)   |
| O19-H19C | 0.807(19)  | O19-H19D | 0.837(19)  |
| O20-H20C | 0.844(19)  | O20-H20D | 0.844(19)  |
| O21-Mo5  | 2.200(2)   | O22-Mo3  | 2.2088(19) |
| O22-Mo4  | 2.3542(19) | O23-Mo1  | 2.321(2)   |
| O23-Mo2  | 2.341(2)   | O24-H24C | 0.829(19)  |
| O24-H24D | 0.820(19)  | O25-H25C | 0.829(19)  |
| O25-H25D | 0.818(19)  | O90-H90A | 0.852(19)  |
| O90-H90B | 0.854(19)  | O91-H91A | 0.855(19)  |
| O91-H91B | 0.861(19)  | O92-H92A | 0.77(5)    |
| O92-H92B | 0.80(5)    | O93-H93A | 0.837(19)  |
| O93-H93B | 0.837(19)  | N1-C1    | 1.326(4)   |
| N1-C4    | 1.356(4)   | N2-C10   | 1.333(4)   |
| N2-C9    | 1.363(4)   | N3-C13   | 1.326(4)   |
| N3-C17   | 1.357(4)   | N4-C24   | 1.325(4)   |
| N4-C18   | 1.360(4)   | C1-C2    | 1.411(4)   |
| C1-H1    | 0.93       | C2-C3    | 1.366(5)   |
| C2-H2    | 0.93       | C3-C5    | 1.410(5)   |
| C3-H3    | 0.93       | C4-C5    | 1.409(4)   |

|          |          |          |          |
|----------|----------|----------|----------|
| C4-C9    | 1.426(4) | C5-C6    | 1.436(4) |
| C6-C7    | 1.364(5) | C6-H6    | 0.93     |
| C7-C8    | 1.436(4) | C7-H7    | 0.93     |
| C8-C9    | 1.401(4) | C8-C12   | 1.410(5) |
| C10-C11  | 1.403(4) | C10-H10  | 0.93     |
| C11-C12  | 1.380(5) | C11-H11  | 0.93     |
| C12-H12  | 0.93     | C13-C14  | 1.397(4) |
| C13-H13  | 0.93     | C14-C15  | 1.370(5) |
| C14-H14  | 0.93     | C15-C16  | 1.412(4) |
| C15-H15  | 0.93     | C16-C17  | 1.406(4) |
| C16-C19  | 1.433(4) | C17-C18  | 1.433(4) |
| C18-C21  | 1.395(4) | C19-C20  | 1.357(5) |
| C19-H19A | 0.93     | C20-C21  | 1.440(4) |
| C20-H20A | 0.93     | C21-C22  | 1.409(4) |
| C22-C23  | 1.377(5) | C22-H22  | 0.93     |
| C23-C24  | 1.405(4) | C23-H23  | 0.93     |
| C24-H24  | 0.93     | C25-C26  | 1.519(4) |
| C25-H25A | 0.97     | C25-H25B | 0.97     |
| C26-C28  | 1.397(4) | C26-C27  | 1.398(4) |
| C27-C29  | 1.392(4) | C27-H27  | 0.93     |
| C28-C30  | 1.394(4) | C28-H28  | 0.93     |
| C29-C31  | 1.397(4) | C29-H29  | 0.93     |

|          |          |          |      |
|----------|----------|----------|------|
| C30-C31  | 1.396(4) | C30-H30  | 0.93 |
| C31-C32  | 1.515(4) | C32-H32A | 0.97 |
| C32-H32B | 0.97     |          |      |

**Table S45.** Bond angles (°) for [ $\{\text{Cu}(\text{o-phen})(\text{H}_2\text{O})_2\}_2\text{Mo}_5\text{O}_{15}(1,4\text{-O}_3\text{PC}_8\text{H}_8\text{PO}_3)]\cdot 4\text{H}_2\text{O}$  ( $6\cdot 4\text{H}_2\text{O}$ ).

|             |            |             |            |
|-------------|------------|-------------|------------|
| O2-Mo1-O3   | 103.14(11) | O2-Mo1-O4   | 97.73(10)  |
| O3-Mo1-O4   | 102.40(9)  | O2-Mo1-O1   | 97.58(9)   |
| O3-Mo1-O1   | 96.82(9)   | O4-Mo1-O1   | 151.93(8)  |
| O2-Mo1-O5   | 93.90(9)   | O3-Mo1-O5   | 161.14(9)  |
| O4-Mo1-O5   | 82.94(8)   | O1-Mo1-O5   | 72.66(8)   |
| O2-Mo1-O23  | 164.78(9)  | O3-Mo1-O23  | 90.63(9)   |
| O4-Mo1-O23  | 72.62(8)   | O1-Mo1-O23  | 87.03(8)   |
| O5-Mo1-O23  | 73.55(7)   | O7-Mo2-O6   | 103.57(11) |
| O7-Mo2-O8   | 102.27(10) | O6-Mo2-O8   | 99.80(10)  |
| O7-Mo2-O4   | 100.19(10) | O6-Mo2-O4   | 101.59(10) |
| O8-Mo2-O4   | 144.19(8)  | O7-Mo2-O9   | 85.69(9)   |
| O6-Mo2-O9   | 169.89(9)  | O8-Mo2-O9   | 73.91(8)   |
| O4-Mo2-O9   | 80.40(8)   | O7-Mo2-O23  | 166.04(9)  |
| O6-Mo2-O23  | 89.58(9)   | O8-Mo2-O23  | 79.70(8)   |
| O4-Mo2-O23  | 72.11(8)   | O9-Mo2-O23  | 81.57(7)   |
| O11-Mo3-O10 | 104.17(10) | O11-Mo3-O8  | 98.45(9)   |
| O10-Mo3-O8  | 99.66(9)   | O11-Mo3-O12 | 100.29(9)  |
| O10-Mo3-O12 | 98.95(9)   | O8-Mo3-O12  | 149.38(8)  |
| O11-Mo3-O22 | 93.85(9)   | O10-Mo3-O22 | 161.48(9)  |
| O8-Mo3-O22  | 81.60(8)   | O12-Mo3-O22 | 73.20(8)   |

|             |            |             |            |
|-------------|------------|-------------|------------|
| O11-Mo3-O9  | 163.39(9)  | O10-Mo3-O9  | 90.68(9)   |
| O8-Mo3-O9   | 71.29(8)   | O12-Mo3-O9  | 84.41(8)   |
| O22-Mo3-O9  | 72.11(7)   | O14-Mo4-O13 | 100.60(10) |
| O14-Mo4-O12 | 102.66(10) | O13-Mo4-O12 | 99.67(10)  |
| O14-Mo4-O16 | 101.83(10) | O13-Mo4-O16 | 96.38(9)   |
| O12-Mo4-O16 | 147.56(8)  | O14-Mo4-O15 | 87.00(9)   |
| O13-Mo4-O15 | 172.23(9)  | O12-Mo4-O15 | 80.04(8)   |
| O16-Mo4-O15 | 80.33(8)   | O14-Mo4-O22 | 173.22(9)  |
| O13-Mo4-O22 | 83.26(8)   | O12-Mo4-O22 | 71.06(8)   |
| O16-Mo4-O22 | 83.14(8)   | O15-Mo4-O22 | 89.34(7)   |
| O17-Mo5-O18 | 100.44(10) | O17-Mo5-O1  | 102.72(9)  |
| O18-Mo5-O1  | 99.78(9)   | O17-Mo5-O16 | 102.21(10) |
| O18-Mo5-O16 | 98.00(9)   | O1-Mo5-O16  | 146.02(8)  |
| O17-Mo5-O21 | 85.57(9)   | O18-Mo5-O21 | 173.95(8)  |
| O1-Mo5-O21  | 78.04(8)   | O16-Mo5-O21 | 81.26(8)   |
| O17-Mo5-O5  | 171.45(9)  | O18-Mo5-O5  | 86.03(8)   |
| O1-Mo5-O5   | 70.42(8)   | O16-Mo5-O5  | 82.25(8)   |
| O21-Mo5-O5  | 87.93(7)   | O18-Cu1-O19 | 91.05(10)  |
| O18-Cu1-N2  | 91.71(10)  | O19-Cu1-N2  | 153.33(12) |
| O18-Cu1-N1  | 173.81(10) | O19-Cu1-N1  | 93.47(10)  |
| N2-Cu1-N1   | 82.36(10)  | O18-Cu1-O20 | 94.85(10)  |
| O19-Cu1-O20 | 84.87(12)  | N2-Cu1-O20  | 121.28(11) |

|               |            |               |            |
|---------------|------------|---------------|------------|
| N1-Cu1-O20    | 89.77(10)  | O13-Cu2-N3    | 175.35(10) |
| O13-Cu2-N4    | 93.26(10)  | N3-Cu2-N4     | 82.52(10)  |
| O13-Cu2-O24   | 91.96(9)   | N3-Cu2-O24    | 92.69(10)  |
| N4-Cu2-O24    | 154.25(10) | O13-Cu2-O25   | 90.13(11)  |
| N3-Cu2-O25    | 89.05(12)  | N4-Cu2-O25    | 104.54(12) |
| O24-Cu2-O25   | 100.65(12) | O15-P1-O5     | 108.86(11) |
| O15-P1-O9     | 111.51(12) | O5-P1-O9      | 111.27(11) |
| O15-P1-C25    | 110.38(12) | O5-P1-C25     | 107.86(13) |
| O9-P1-C25     | 106.89(12) | O21-P2-O22    | 108.60(11) |
| O21-P2-O23    | 111.89(11) | O22-P2-O23    | 111.28(11) |
| O21-P2-C32    | 110.01(12) | O22-P2-C32    | 108.99(13) |
| O23-P2-C32    | 106.02(12) | Mo5-O1-Mo1    | 121.78(10) |
| Mo1-O4-Mo2    | 122.99(11) | P1-O5-Mo1     | 129.19(11) |
| P1-O5-Mo5     | 134.74(11) | Mo1-O5-Mo5    | 94.76(7)   |
| Mo2-O8-Mo3    | 124.55(11) | P1-O9-Mo2     | 126.34(11) |
| P1-O9-Mo3     | 127.04(11) | Mo2-O9-Mo3    | 89.96(7)   |
| Mo4-O12-Mo3   | 121.38(10) | Mo4-O13-Cu2   | 152.30(13) |
| P1-O15-Mo4    | 119.98(11) | Mo5-O16-Mo4   | 147.36(11) |
| Mo5-O18-Cu1   | 151.84(13) | Cu1-O19-H19C  | 91.(4)     |
| Cu1-O19-H19D  | 119.(3)    | H19C-O19-H19D | 99.(5)     |
| Cu1-O20-H20C  | 81.(4)     | Cu1-O20-H20D  | 134.(4)    |
| H20C-O20-H20D | 64.(4)     | P2-O21-Mo5    | 120.93(11) |

|               |            |               |            |
|---------------|------------|---------------|------------|
| P2-O22-Mo3    | 129.53(11) | P2-O22-Mo4    | 135.20(11) |
| Mo3-O22-Mo4   | 94.25(7)   | P2-O23-Mo1    | 127.56(11) |
| P2-O23-Mo2    | 125.42(11) | Mo1-O23-Mo2   | 92.12(7)   |
| Cu2-O24-H24C  | 129.(3)    | Cu2-O24-H24D  | 113.(3)    |
| H24C-O24-H24D | 101.(4)    | Cu2-O25-H25C  | 112.(4)    |
| Cu2-O25-H25D  | 102.(4)    | H25C-O25-H25D | 132.(6)    |
| H90A-O90-H90B | 100.(5)    | H91A-O91-H91B | 75.(4)     |
| H92A-O92-H92B | 116.(5)    | H93A-O93-H93B | 104.(4)    |
| C1-N1-C4      | 118.6(3)   | C1-N1-Cu1     | 129.2(2)   |
| C4-N1-Cu1     | 112.18(19) | C10-N2-C9     | 118.5(3)   |
| C10-N2-Cu1    | 128.0(2)   | C9-N2-Cu1     | 112.7(2)   |
| C13-N3-C17    | 118.1(3)   | C13-N3-Cu2    | 129.5(2)   |
| C17-N3-Cu2    | 112.41(19) | C24-N4-C18    | 118.4(3)   |
| C24-N4-Cu2    | 129.3(2)   | C18-N4-Cu2    | 112.15(19) |
| N1-C1-C2      | 121.7(3)   | N1-C1-H1      | 119.2      |
| C2-C1-H1      | 119.2      | C3-C2-C1      | 120.0(3)   |
| C3-C2-H2      | 120.0      | C1-C2-H2      | 120.0      |
| C2-C3-C5      | 119.6(3)   | C2-C3-H3      | 120.2      |
| C5-C3-H3      | 120.2      | N1-C4-C5      | 123.5(3)   |
| N1-C4-C9      | 116.2(3)   | C5-C4-C9      | 120.3(3)   |
| C4-C5-C3      | 116.5(3)   | C4-C5-C6      | 118.1(3)   |
| C3-C5-C6      | 125.4(3)   | C7-C6-C5      | 121.6(3)   |

|              |          |              |          |
|--------------|----------|--------------|----------|
| C7-C6-H6     | 119.2    | C5-C6-H6     | 119.2    |
| C6-C7-C8     | 120.7(3) | C6-C7-H7     | 119.6    |
| C8-C7-H7     | 119.6    | C9-C8-C12    | 117.2(3) |
| C9-C8-C7     | 118.6(3) | C12-C8-C7    | 124.2(3) |
| N2-C9-C8     | 123.2(3) | N2-C9-C4     | 116.2(3) |
| C8-C9-C4     | 120.6(3) | N2-C10-C11   | 121.9(3) |
| N2-C10-H10   | 119.0    | C11-C10-H10  | 119.0    |
| C12-C11-C10  | 119.8(3) | C12-C11-H11  | 120.1    |
| C10-C11-H11  | 120.1    | C11-C12-C8   | 119.4(3) |
| C11-C12-H12  | 120.3    | C8-C12-H12   | 120.3    |
| N3-C13-C14   | 122.0(3) | N3-C13-H13   | 119.0    |
| C14-C13-H13  | 119.0    | C15-C14-C13  | 120.3(3) |
| C15-C14-H14  | 119.8    | C13-C14-H14  | 119.8    |
| C14-C15-C16  | 119.2(3) | C14-C15-H15  | 120.4    |
| C16-C15-H15  | 120.4    | C17-C16-C15  | 116.4(3) |
| C17-C16-C19  | 118.5(3) | C15-C16-C19  | 125.1(3) |
| N3-C17-C16   | 123.8(3) | N3-C17-C18   | 116.3(2) |
| C16-C17-C18  | 119.8(3) | N4-C18-C21   | 123.7(3) |
| N4-C18-C17   | 115.6(3) | C21-C18-C17  | 120.7(3) |
| C20-C19-C16  | 121.5(3) | C20-C19-H19A | 119.3    |
| C16-C19-H19A | 119.3    | C19-C20-C21  | 120.8(3) |
| C19-C20-H20A | 119.6    | C21-C20-H20A | 119.6    |



|             |            |               |          |
|-------------|------------|---------------|----------|
| C18-C21-C22 | 117.0(3)   | C18-C21-C20   | 118.6(3) |
| C22-C21-C20 | 124.4(3)   | C23-C22-C21   | 119.0(3) |
| C23-C22-H22 | 120.5      | C21-C22-H22   | 120.5    |
| C22-C23-C24 | 120.1(3)   | C22-C23-H23   | 120.0    |
| C24-C23-H23 | 120.0      | N4-C24-C23    | 121.7(3) |
| N4-C24-H24  | 119.2      | C23-C24-H24   | 119.2    |
| C26-C25-P1  | 116.88(19) | C26-C25-H25A  | 108.1    |
| P1-C25-H25A | 108.1      | C26-C25-H25B  | 108.1    |
| P1-C25-H25B | 108.1      | H25A-C25-H25B | 107.3    |
| C28-C26-C27 | 118.2(3)   | C28-C26-C25   | 122.0(2) |
| C27-C26-C25 | 119.8(2)   | C29-C27-C26   | 120.9(3) |
| C29-C27-H27 | 119.6      | C26-C27-H27   | 119.6    |
| C30-C28-C26 | 121.0(3)   | C30-C28-H28   | 119.5    |
| C26-C28-H28 | 119.5      | C27-C29-C31   | 120.8(3) |
| C27-C29-H29 | 119.6      | C31-C29-H29   | 119.6    |
| C28-C30-C31 | 120.7(3)   | C28-C30-H30   | 119.7    |
| C31-C30-H30 | 119.7      | C30-C31-C29   | 118.4(3) |
| C30-C31-C32 | 121.9(3)   | C29-C31-C32   | 119.7(2) |
| C31-C32-P2  | 116.29(19) | C31-C32-H32A  | 108.2    |
| P2-C32-H32A | 108.2      | C31-C32-H32B  | 108.2    |
| P2-C32-H32B | 108.2      | H32A-C32-H32B | 107.4    |

**Table S46.** Torsion angles (°) for [ $\{\text{Cu}(\text{o-phen})(\text{H}_2\text{O})_2\}_2\text{Mo}_5\text{O}_{15}(1,4\text{-O}_3\text{PC}_8\text{H}_8\text{PO}_3)]\cdot 4\text{H}_2\text{O}$  ( $6\cdot 4\text{H}_2\text{O}$ ).

|                 |             |                 |             |
|-----------------|-------------|-----------------|-------------|
| O15-P1-O5-Mo1   | 172.62(14)  | O9-P1-O5-Mo1    | 49.34(18)   |
| C25-P1-O5-Mo1   | -67.60(17)  | O15-P1-O5-Mo5   | 9.1(2)      |
| O9-P1-O5-Mo5    | -114.15(16) | C25-P1-O5-Mo5   | 128.91(16)  |
| O7-Mo2-O8-Mo3   | -76.63(14)  | O6-Mo2-O8-Mo3   | 177.04(13)  |
| O4-Mo2-O8-Mo3   | 51.0(2)     | O9-Mo2-O8-Mo3   | 5.16(11)    |
| O23-Mo2-O8-Mo3  | 89.27(12)   | O15-P1-O9-Mo2   | -153.05(12) |
| O5-P1-O9-Mo2    | -31.30(17)  | C25-P1-O9-Mo2   | 86.23(16)   |
| O15-P1-O9-Mo3   | -29.42(17)  | O5-P1-O9-Mo3    | 92.33(15)   |
| C25-P1-O9-Mo3   | -150.14(14) | O14-Mo4-O12-Mo3 | 174.35(12)  |
| O13-Mo4-O12-Mo3 | -82.38(13)  | O16-Mo4-O12-Mo3 | 36.2(2)     |
| O15-Mo4-O12-Mo3 | 89.75(12)   | O22-Mo4-O12-Mo3 | -3.00(10)   |
| O14-Mo4-O13-Cu2 | -11.8(3)    | O12-Mo4-O13-Cu2 | -116.7(3)   |
| O16-Mo4-O13-Cu2 | 91.6(3)     | O22-Mo4-O13-Cu2 | 173.8(3)    |
| O5-P1-O15-Mo4   | -63.24(15)  | O9-P1-O15-Mo4   | 59.89(15)   |
| C25-P1-O15-Mo4  | 178.55(12)  | O17-Mo5-O18-Cu1 | -8.5(3)     |
| O1-Mo5-O18-Cu1  | -113.5(3)   | O16-Mo5-O18-Cu1 | 95.6(3)     |
| O5-Mo5-O18-Cu1  | 177.1(3)    | O22-P2-O21-Mo5  | -63.25(15)  |
| O23-P2-O21-Mo5  | 59.98(16)   | C32-P2-O21-Mo5  | 177.55(12)  |
| O21-P2-O22-Mo3  | 176.00(13)  | O23-P2-O22-Mo3  | 52.41(18)   |
| C32-P2-O22-Mo3  | -64.16(18)  | O21-P2-O22-Mo4  | 10.7(2)     |

|                |             |                |             |
|----------------|-------------|----------------|-------------|
| O23-P2-O22-Mo4 | -112.87(16) | C32-P2-O22-Mo4 | 130.56(16)  |
| O21-P2-O23-Mo1 | -26.57(18)  | O22-P2-O23-Mo1 | 95.12(15)   |
| C32-P2-O23-Mo1 | -146.51(14) | O21-P2-O23-Mo2 | -153.73(12) |
| O22-P2-O23-Mo2 | -32.04(17)  | C32-P2-O23-Mo2 | 86.33(16)   |
| C4-N1-C1-C2    | -0.4(4)     | Cu1-N1-C1-C2   | 176.6(2)    |
| N1-C1-C2-C3    | -1.6(5)     | C1-C2-C3-C5    | 1.0(5)      |
| C1-N1-C4-C5    | 2.9(4)      | Cu1-N1-C4-C5   | -174.6(2)   |
| C1-N1-C4-C9    | -178.9(3)   | Cu1-N1-C4-C9   | 3.6(3)      |
| N1-C4-C5-C3    | -3.4(4)     | C9-C4-C5-C3    | 178.5(3)    |
| N1-C4-C5-C6    | 176.8(3)    | C9-C4-C5-C6    | -1.3(4)     |
| C2-C3-C5-C4    | 1.3(4)      | C2-C3-C5-C6    | -178.9(3)   |
| C4-C5-C6-C7    | 1.2(4)      | C3-C5-C6-C7    | -178.6(3)   |
| C5-C6-C7-C8    | -0.9(5)     | C6-C7-C8-C9    | 0.7(4)      |
| C6-C7-C8-C12   | -176.8(3)   | C10-N2-C9-C8   | 2.0(4)      |
| Cu1-N2-C9-C8   | 172.8(2)    | C10-N2-C9-C4   | -176.2(3)   |
| Cu1-N2-C9-C4   | -5.3(3)     | C12-C8-C9-N2   | -1.2(4)     |
| C7-C8-C9-N2    | -178.9(3)   | C12-C8-C9-C4   | 176.8(3)    |
| C7-C8-C9-C4    | -0.8(4)     | N1-C4-C9-N2    | 1.1(4)      |
| C5-C4-C9-N2    | 179.4(3)    | N1-C4-C9-C8    | -177.1(3)   |
| C5-C4-C9-C8    | 1.2(4)      | C9-N2-C10-C11  | -0.8(4)     |
| Cu1-N2-C10-C11 | -170.0(2)   | N2-C10-C11-C12 | -1.1(5)     |
| C10-C11-C12-C8 | 1.8(5)      | C9-C8-C12-C11  | -0.7(4)     |

|                 |           |                 |           |
|-----------------|-----------|-----------------|-----------|
| C7-C8-C12-C11   | 176.8(3)  | C17-N3-C13-C14  | -0.7(4)   |
| Cu2-N3-C13-C14  | 178.2(2)  | N3-C13-C14-C15  | -2.2(5)   |
| C13-C14-C15-C16 | 2.3(5)    | C14-C15-C16-C17 | 0.4(4)    |
| C14-C15-C16-C19 | 178.4(3)  | C13-N3-C17-C16  | 3.7(4)    |
| Cu2-N3-C17-C16  | -175.5(2) | C13-N3-C17-C18  | -174.2(3) |
| Cu2-N3-C17-C18  | 6.6(3)    | C15-C16-C17-N3  | -3.5(4)   |
| C19-C16-C17-N3  | 178.3(3)  | C15-C16-C17-C18 | 174.4(3)  |
| C19-C16-C17-C18 | -3.8(4)   | C24-N4-C18-C21  | -3.1(4)   |
| Cu2-N4-C18-C21  | 173.1(2)  | C24-N4-C18-C17  | 176.4(3)  |
| Cu2-N4-C18-C17  | -7.4(3)   | N3-C17-C18-N4   | 0.6(4)    |
| C16-C17-C18-N4  | -177.4(3) | N3-C17-C18-C21  | -179.9(3) |
| C16-C17-C18-C21 | 2.1(4)    | C17-C16-C19-C20 | 2.2(4)    |
| C15-C16-C19-C20 | -175.8(3) | C16-C19-C20-C21 | 1.3(5)    |
| N4-C18-C21-C22  | 3.0(4)    | C17-C18-C21-C22 | -176.5(3) |
| N4-C18-C21-C20  | -179.2(3) | C17-C18-C21-C20 | 1.3(4)    |
| C19-C20-C21-C18 | -3.0(4)   | C19-C20-C21-C22 | 174.7(3)  |
| C18-C21-C22-C23 | -0.1(4)   | C20-C21-C22-C23 | -177.8(3) |
| C21-C22-C23-C24 | -2.5(4)   | C18-N4-C24-C23  | 0.3(4)    |
| Cu2-N4-C24-C23  | -175.1(2) | C22-C23-C24-N4  | 2.5(5)    |
| O15-P1-C25-C26  | 53.9(2)   | O5-P1-C25-C26   | -64.9(2)  |
| O9-P1-C25-C26   | 175.3(2)  | P1-C25-C26-C28  | 71.2(3)   |
| P1-C25-C26-C27  | -110.4(3) | C28-C26-C27-C29 | -0.4(4)   |

|                 |           |                 |          |
|-----------------|-----------|-----------------|----------|
| C25-C26-C27-C29 | -178.8(3) | C27-C26-C28-C30 | -0.7(4)  |
| C25-C26-C28-C30 | 177.8(3)  | C26-C27-C29-C31 | 1.0(4)   |
| C26-C28-C30-C31 | 1.0(4)    | C28-C30-C31-C29 | -0.4(4)  |
| C28-C30-C31-C32 | 177.5(3)  | C27-C29-C31-C30 | -0.6(4)  |
| C27-C29-C31-C32 | -178.6(3) | C30-C31-C32-P2  | 76.0(3)  |
| C29-C31-C32-P2  | -106.2(3) | O21-P2-C32-C31  | 47.3(2)  |
| O22-P2-C32-C31  | -71.6(2)  | O23-P2-C32-C31  | 168.5(2) |

**Table S47.** Anisotropic atomic displacement parameters ( $\text{\AA}^2$ ) for [ $\{\text{Cu}(\text{o-phen})(\text{H}_2\text{O})_2\}_2\text{Mo}_5\text{O}_{15}(1,4\text{-O}_3\text{PC}_8\text{H}_8\text{PO}_3)\}\cdot 4\text{H}_2\text{O}$  ( $6\cdot 4\text{H}_2\text{O}$ ).

The anisotropic atomic displacement factor exponent takes the form:  $-2\pi^2 [ h^2 a^{*2} U_{11} + \dots + 2 h k a^* b^* U_{12} ]$

|     | $U_{11}$    | $U_{22}$    | $U_{33}$    | $U_{23}$     | $U_{13}$    | $U_{12}$     |
|-----|-------------|-------------|-------------|--------------|-------------|--------------|
| Mo1 | 0.00814(9)  | 0.00641(10) | 0.00938(9)  | -0.00083(7)  | 0.00366(7)  | -0.00091(7)  |
| Mo2 | 0.00807(9)  | 0.00767(10) | 0.01062(10) | -0.00084(7)  | 0.00470(8)  | -0.00077(7)  |
| Mo3 | 0.00862(9)  | 0.00669(10) | 0.00866(9)  | -0.00041(7)  | 0.00414(7)  | -0.00021(7)  |
| Mo4 | 0.00756(9)  | 0.00778(10) | 0.00831(9)  | -0.00017(7)  | 0.00317(7)  | -0.00079(7)  |
| Mo5 | 0.00803(9)  | 0.00705(10) | 0.00875(9)  | -0.00036(7)  | 0.00415(7)  | 0.00022(7)   |
| Cu1 | 0.00940(14) | 0.00918(16) | 0.01110(15) | -0.00034(11) | 0.00369(12) | 0.00169(11)  |
| Cu2 | 0.01098(14) | 0.00901(16) | 0.01068(15) | -0.00078(11) | 0.00519(12) | -0.00264(11) |
| P1  | 0.0085(3)   | 0.0059(3)   | 0.0092(3)   | 0.0002(2)    | 0.0042(2)   | 0.0002(2)    |
| P2  | 0.0073(3)   | 0.0058(3)   | 0.0087(3)   | -0.0001(2)   | 0.0033(2)   | 0.0003(2)    |
| O1  | 0.0106(8)   | 0.0070(9)   | 0.0091(8)   | -0.0007(6)   | 0.0045(7)   | 0.0004(6)    |
| O2  | 0.0154(9)   | 0.0076(9)   | 0.0166(10)  | -0.0009(7)   | 0.0089(8)   | -0.0011(7)   |
| O3  | 0.0114(8)   | 0.0123(10)  | 0.0112(9)   | 0.0008(7)    | 0.0040(7)   | 0.0000(7)    |
| O4  | 0.0126(8)   | 0.0070(9)   | 0.0133(9)   | -0.0027(7)   | 0.0070(7)   | -0.0024(7)   |
| O5  | 0.0094(8)   | 0.0097(9)   | 0.0090(8)   | -0.0004(7)   | 0.0037(7)   | -0.0004(6)   |
| O6  | 0.0105(8)   | 0.0135(11)  | 0.0165(10)  | -0.0018(8)   | 0.0050(8)   | -0.0002(7)   |
| O7  | 0.0161(9)   | 0.0143(11)  | 0.0177(10)  | -0.0007(8)   | 0.0102(8)   | -0.0004(8)   |
| O8  | 0.0100(8)   | 0.0082(9)   | 0.0109(9)   | -0.0011(7)   | 0.0047(7)   | 0.0012(6)    |
| O9  | 0.0092(8)   | 0.0069(9)   | 0.0108(8)   | -0.0002(6)   | 0.0042(7)   | 0.0008(6)    |

|     | <b>U<sub>11</sub></b> | <b>U<sub>22</sub></b> | <b>U<sub>33</sub></b> | <b>U<sub>23</sub></b> | <b>U<sub>13</sub></b> | <b>U<sub>12</sub></b> |
|-----|-----------------------|-----------------------|-----------------------|-----------------------|-----------------------|-----------------------|
| O10 | 0.0123(8)             | 0.0126(10)            | 0.0114(9)             | -0.0001(7)            | 0.0064(7)             | 0.0004(7)             |
| O11 | 0.0132(9)             | 0.0077(10)            | 0.0157(10)            | -0.0007(7)            | 0.0066(8)             | -0.0006(7)            |
| O12 | 0.0101(8)             | 0.0100(9)             | 0.0088(8)             | -0.0004(7)            | 0.0043(7)             | 0.0003(7)             |
| O13 | 0.0132(9)             | 0.0103(10)            | 0.0127(9)             | -0.0017(7)            | 0.0056(7)             | -0.0033(7)            |
| O14 | 0.0093(8)             | 0.0160(11)            | 0.0130(9)             | 0.0016(7)             | 0.0035(7)             | 0.0010(7)             |
| O15 | 0.0095(8)             | 0.0067(9)             | 0.0118(9)             | 0.0008(7)             | 0.0041(7)             | 0.0004(6)             |
| O16 | 0.0099(8)             | 0.0094(9)             | 0.0095(8)             | -0.0008(7)            | 0.0048(7)             | -0.0002(6)            |
| O17 | 0.0142(9)             | 0.0142(11)            | 0.0127(9)             | 0.0005(7)             | 0.0078(8)             | 0.0000(7)             |
| O18 | 0.0107(8)             | 0.0097(10)            | 0.0125(9)             | 0.0001(7)             | 0.0051(7)             | 0.0021(7)             |
| O19 | 0.0160(10)            | 0.0211(13)            | 0.0197(12)            | -0.0068(9)            | -0.0003(9)            | 0.0055(9)             |
| O20 | 0.0279(13)            | 0.0224(14)            | 0.0349(15)            | 0.0100(11)            | 0.0211(12)            | 0.0052(10)            |
| O21 | 0.0103(8)             | 0.0072(9)             | 0.0110(8)             | -0.0003(6)            | 0.0059(7)             | 0.0009(6)             |
| O22 | 0.0088(8)             | 0.0088(9)             | 0.0079(8)             | 0.0001(6)             | 0.0035(7)             | 0.0003(6)             |
| O23 | 0.0096(8)             | 0.0072(9)             | 0.0119(9)             | 0.0013(7)             | 0.0050(7)             | 0.0019(6)             |
| O24 | 0.0202(10)            | 0.0089(10)            | 0.0181(10)            | -0.0012(8)            | 0.0122(8)             | -0.0018(8)            |
| O25 | 0.0184(12)            | 0.0205(15)            | 0.052(2)              | -0.0118(14)           | -0.0058(13)           | 0.0058(10)            |
| O90 | 0.0229(13)            | 0.048(2)              | 0.0364(16)            | 0.0036(14)            | 0.0172(12)            | 0.0085(13)            |
| O91 | 0.0212(12)            | 0.0286(15)            | 0.0326(15)            | 0.0019(11)            | 0.0138(11)            | -0.0026(10)           |
| O92 | 0.0239(12)            | 0.0255(14)            | 0.0264(13)            | 0.0077(10)            | 0.0179(11)            | 0.0076(10)            |
| O93 | 0.0207(10)            | 0.0140(11)            | 0.0154(10)            | 0.0040(8)             | 0.0075(9)             | -0.0028(8)            |
| N1  | 0.0112(10)            | 0.0104(11)            | 0.0138(11)            | -0.0002(8)            | 0.0057(8)             | -0.0001(8)            |

|     | $U_{11}$   | $U_{22}$   | $U_{33}$   | $U_{23}$    | $U_{13}$   | $U_{12}$    |
|-----|------------|------------|------------|-------------|------------|-------------|
| N2  | 0.0110(10) | 0.0112(12) | 0.0139(11) | -0.0006(8)  | 0.0055(8)  | 0.0002(8)   |
| N3  | 0.0100(9)  | 0.0093(11) | 0.0128(10) | -0.0021(8)  | 0.0048(8)  | -0.0011(8)  |
| N4  | 0.0106(9)  | 0.0096(11) | 0.0131(10) | 0.0002(8)   | 0.0055(8)  | -0.0011(8)  |
| C1  | 0.0149(12) | 0.0144(14) | 0.0169(13) | -0.0031(10) | 0.0089(10) | -0.0008(10) |
| C2  | 0.0161(12) | 0.0134(14) | 0.0226(15) | -0.0035(11) | 0.0112(11) | -0.0015(10) |
| C3  | 0.0153(12) | 0.0113(14) | 0.0300(17) | -0.0013(11) | 0.0134(12) | -0.0004(10) |
| C4  | 0.0090(10) | 0.0094(12) | 0.0146(12) | 0.0000(9)   | 0.0051(9)  | -0.0007(8)  |
| C5  | 0.0095(11) | 0.0105(13) | 0.0231(14) | 0.0036(10)  | 0.0075(10) | 0.0017(9)   |
| C6  | 0.0119(11) | 0.0130(14) | 0.0234(15) | 0.0046(11)  | 0.0065(11) | 0.0013(10)  |
| C7  | 0.0123(12) | 0.0167(15) | 0.0188(14) | 0.0054(11)  | 0.0035(11) | -0.0018(10) |
| C8  | 0.0115(11) | 0.0131(14) | 0.0135(12) | 0.0022(10)  | 0.0039(10) | -0.0031(9)  |
| C9  | 0.0097(10) | 0.0099(13) | 0.0141(12) | 0.0010(9)   | 0.0045(9)  | -0.0012(9)  |
| C10 | 0.0136(12) | 0.0135(14) | 0.0158(13) | -0.0023(10) | 0.0071(10) | -0.0017(10) |
| C11 | 0.0161(12) | 0.0184(15) | 0.0133(13) | -0.0037(10) | 0.0057(10) | -0.0058(10) |
| C12 | 0.0137(12) | 0.0199(16) | 0.0122(12) | 0.0003(10)  | 0.0034(10) | -0.0058(10) |
| C13 | 0.0115(11) | 0.0105(13) | 0.0177(13) | -0.0044(10) | 0.0048(10) | -0.0015(9)  |
| C14 | 0.0108(11) | 0.0110(14) | 0.0257(15) | -0.0030(11) | 0.0056(11) | -0.0029(9)  |
| C15 | 0.0109(11) | 0.0091(13) | 0.0310(16) | -0.0005(11) | 0.0100(11) | -0.0018(9)  |
| C16 | 0.0129(11) | 0.0070(12) | 0.0247(15) | 0.0018(10)  | 0.0114(11) | 0.0005(9)   |
| C17 | 0.0120(11) | 0.0075(12) | 0.0160(12) | 0.0000(9)   | 0.0079(10) | -0.0004(9)  |
| C18 | 0.0116(11) | 0.0090(12) | 0.0140(12) | 0.0001(9)   | 0.0069(9)  | 0.0003(9)   |



|     | <b>U<sub>11</sub></b> | <b>U<sub>22</sub></b> | <b>U<sub>33</sub></b> | <b>U<sub>23</sub></b> | <b>U<sub>13</sub></b> | <b>U<sub>12</sub></b> |
|-----|-----------------------|-----------------------|-----------------------|-----------------------|-----------------------|-----------------------|
| C19 | 0.0165(12)            | 0.0118(14)            | 0.0251(15)            | 0.0066(11)            | 0.0138(12)            | 0.0035(10)            |
| C20 | 0.0188(13)            | 0.0147(14)            | 0.0183(13)            | 0.0062(11)            | 0.0118(11)            | 0.0056(10)            |
| C21 | 0.0145(12)            | 0.0122(13)            | 0.0136(12)            | 0.0036(9)             | 0.0070(10)            | 0.0034(9)             |
| C22 | 0.0169(12)            | 0.0153(14)            | 0.0115(12)            | 0.0013(10)            | 0.0061(10)            | 0.0038(10)            |
| C23 | 0.0169(12)            | 0.0148(14)            | 0.0109(12)            | -0.0020(10)           | 0.0032(10)            | -0.0004(10)           |
| C24 | 0.0131(11)            | 0.0118(13)            | 0.0140(12)            | -0.0018(9)            | 0.0052(10)            | -0.0005(9)            |
| C25 | 0.0129(11)            | 0.0059(12)            | 0.0159(12)            | 0.0018(9)             | 0.0093(10)            | 0.0001(8)             |
| C26 | 0.0100(10)            | 0.0064(12)            | 0.0131(11)            | 0.0011(9)             | 0.0061(9)             | 0.0008(8)             |
| C27 | 0.0156(12)            | 0.0092(13)            | 0.0113(11)            | 0.0011(9)             | 0.0068(10)            | 0.0012(9)             |
| C28 | 0.0123(11)            | 0.0087(12)            | 0.0129(12)            | 0.0005(9)             | 0.0048(9)             | 0.0011(9)             |
| C29 | 0.0127(11)            | 0.0099(13)            | 0.0115(12)            | 0.0002(9)             | 0.0047(9)             | 0.0022(9)             |
| C30 | 0.0153(12)            | 0.0077(12)            | 0.0126(12)            | -0.0013(9)            | 0.0060(10)            | 0.0007(9)             |
| C31 | 0.0109(10)            | 0.0050(11)            | 0.0143(12)            | 0.0001(9)             | 0.0063(9)             | 0.0000(8)             |
| C32 | 0.0092(10)            | 0.0058(12)            | 0.0157(12)            | -0.0015(9)            | 0.0059(9)             | -0.0010(8)            |

**Table S48.** Hydrogen atomic coordinates and isotropic atomic displacement parameters ( $\text{\AA}^2$ ) for  $[\{\text{Cu}(\text{o-phen})(\text{H}_2\text{O})_2\}_2\text{Mo}_5\text{O}_{15}(1,4\text{-O}_3\text{PC}_8\text{H}_8\text{PO}_3)]\cdot 4\text{H}_2\text{O}$  (**6**·4H<sub>2</sub>O).

|      | <b>x/a</b> | <b>y/b</b> | <b>z/c</b> | <b>U(eq)</b> |
|------|------------|------------|------------|--------------|
| H19C | 0.919(4)   | 0.824(2)   | 0.953(3)   | 0.027        |
| H19D | 1.008(2)   | 0.830(2)   | 0.947(3)   | 0.027        |
| H20C | 0.732(4)   | 0.737(2)   | 0.8539(19) | 0.031        |
| H20D | 0.759(4)   | 0.7156(10) | 0.903(3)   | 0.031        |
| H24C | 0.783(3)   | 0.425(2)   | 0.525(2)   | 0.017        |
| H24D | 0.752(4)   | 0.3780(9)  | 0.552(3)   | 0.017        |
| H25C | 0.602(5)   | 0.5572(17) | 0.605(3)   | 0.047        |
| H25D | 0.573(5)   | 0.517(3)   | 0.5297(16) | 0.047        |
| H90A | 0.606(2)   | 0.872(3)   | 0.348(3)   | 0.041        |
| H90B | 0.666(5)   | 0.871(3)   | 0.3085(19) | 0.041        |
| H91A | 0.679(4)   | 0.8439(16) | 0.226(3)   | 0.032        |
| H91B | 0.608(4)   | 0.8474(19) | 0.167(3)   | 0.032        |
| H92A | 0.549(4)   | 0.276(3)   | 0.442(3)   | 0.027        |
| H92B | 0.561(4)   | 0.313(2)   | 0.387(3)   | 0.027        |
| H93A | 0.178(3)   | 0.696(2)   | 0.5571(12) | 0.021        |
| H93B | 0.160(4)   | 0.7351(11) | 0.496(3)   | 0.021        |
| H1   | 0.7524     | 0.8999     | 0.9273     | 0.018        |
| H2   | 0.6184     | 0.9789     | 0.8978     | 0.02         |
| H3   | 0.5019     | 1.0084     | 0.7618     | 0.021        |

|      | <b>x/a</b> | <b>y/b</b> | <b>z/c</b> | <b>U(eq)</b> |
|------|------------|------------|------------|--------------|
| H6   | 0.4432     | 0.9918     | 0.6044     | 0.02         |
| H7   | 0.4611     | 0.9352     | 0.5050     | 0.021        |
| H10  | 0.8065     | 0.7511     | 0.6607     | 0.017        |
| H11  | 0.7060     | 0.7721     | 0.5186     | 0.02         |
| H12  | 0.5647     | 0.8476     | 0.4696     | 0.02         |
| H13  | 0.5365     | 0.3706     | 0.5286     | 0.017        |
| H14  | 0.4249     | 0.2972     | 0.5489     | 0.02         |
| H15  | 0.4607     | 0.2708     | 0.6820     | 0.02         |
| H19A | 0.5805     | 0.2922     | 0.8415     | 0.019        |
| H20A | 0.7143     | 0.3512     | 0.9457     | 0.019        |
| H22  | 0.8490     | 0.4475     | 0.9885     | 0.018        |
| H23  | 0.9251     | 0.5282     | 0.9456     | 0.019        |
| H24  | 0.8857     | 0.5347     | 0.8069     | 0.016        |
| H25A | 1.1623     | 0.7967     | 0.6864     | 0.013        |
| H25B | 1.0768     | 0.7853     | 0.5923     | 0.013        |
| H27  | 0.9239     | 0.8537     | 0.5264     | 0.014        |
| H28  | 1.0700     | 0.8416     | 0.7765     | 0.014        |
| H29  | 0.8102     | 0.9345     | 0.5286     | 0.014        |
| H30  | 0.9599     | 0.9244     | 0.7790     | 0.015        |
| H32A | 0.7645     | 0.9785     | 0.6896     | 0.012        |
| H32B | 0.7333     | 0.9945     | 0.5973     | 0.012        |

**Table S49.** Sample and crystal data for  $[\text{Cu}_2(\text{o-phen})_2(\text{H}_2\text{O})_2(1,4\text{-HO}_3\text{PC}_8\text{H}_8\text{PO}_3\text{H})][\text{Cu}(\text{o-phen})(\text{H}_2\text{O})\text{Mo}_5\text{O}_{14}(\text{OH})(1,4\text{-O}_3\text{PC}_8\text{H}_8\text{O}_3\text{P})]_2$  (**7**).

|                        |                                                                                                                                                                                                                                                           |                             |
|------------------------|-----------------------------------------------------------------------------------------------------------------------------------------------------------------------------------------------------------------------------------------------------------|-----------------------------|
| Identification code    | $[\text{Cu}_2(\text{o-phen})_2(\text{H}_2\text{O})_2(1,4\text{-HO}_3\text{PC}_8\text{H}_8\text{PO}_3\text{H})][\text{Cu}(\text{o-phen})(\text{H}_2\text{O})\text{Mo}_5\text{O}_{14}(\text{OH})(1,4\text{-O}_3\text{PC}_8\text{H}_8\text{O}_3\text{P})]_2$ |                             |
| Chemical formula       | $\text{C}_{36}\text{H}_{34}\text{Cu}_2\text{Mo}_5\text{N}_4\text{O}_{26}\text{P}_3$                                                                                                                                                                       |                             |
| Formula weight         | 1638.36                                                                                                                                                                                                                                                   |                             |
| Temperature            | 90(2) K                                                                                                                                                                                                                                                   |                             |
| Wavelength             | 0.71073 Å                                                                                                                                                                                                                                                 |                             |
| Crystal size           | 0.076 x 0.121 x 0.121 mm                                                                                                                                                                                                                                  |                             |
| Crystal system         | Monoclinic                                                                                                                                                                                                                                                |                             |
| Space group            | C2/c                                                                                                                                                                                                                                                      |                             |
| Unit cell dimensions   | $a = 53.884(3)$ Å                                                                                                                                                                                                                                         | $\alpha = 90^\circ$         |
|                        | $b = 9.5839(5)$ Å                                                                                                                                                                                                                                         | $\beta = 91.5890(10)^\circ$ |
|                        | $c = 18.7832(9)$ Å                                                                                                                                                                                                                                        | $\gamma = 90^\circ$         |
| Volume                 | $9696.3(8)$ Å <sup>3</sup>                                                                                                                                                                                                                                |                             |
| Z                      | 8                                                                                                                                                                                                                                                         |                             |
| Density (calculated)   | 2.245 g/cm <sup>3</sup>                                                                                                                                                                                                                                   |                             |
| Absorption coefficient | 2.306 mm <sup>-1</sup>                                                                                                                                                                                                                                    |                             |
| F(000)                 | 6392                                                                                                                                                                                                                                                      |                             |

**Table S50.** Data collection and structure refinement for  $[\text{Cu}_2(\text{o-phen})_2(\text{H}_2\text{O})_2(1,4\text{-HO}_3\text{PC}_8\text{H}_8\text{PO}_3\text{H})][\text{Cu}(\text{o-phen})(\text{H}_2\text{O})\text{Mo}_5\text{O}_{14}(\text{OH})(1,4\text{-O}_3\text{PC}_8\text{H}_8\text{O}_3\text{P})]_2$  (**7**).

|                                     |                                                                                      |                           |
|-------------------------------------|--------------------------------------------------------------------------------------|---------------------------|
| Theta range for data collection     | 2.16 to 26.37°                                                                       |                           |
| Index ranges                        | -67 ≤ h ≤ 67, -11 ≤ k ≤ 11, -20 ≤ l ≤ 23                                             |                           |
| Reflections collected               | 55032                                                                                |                           |
| Independent reflections             | 9899 [R(int) = 0.0619]                                                               |                           |
| Coverage of independent reflections | 99.9%                                                                                |                           |
| Absorption correction               | multi-scan                                                                           |                           |
| Max. and min. transmission          | 0.8440 and 0.7680                                                                    |                           |
| Refinement method                   | Full-matrix least-squares on F <sup>2</sup>                                          |                           |
| Refinement program                  | SHELXL-2013 (Sheldrick, 2013)                                                        |                           |
| Function minimized                  | $\Sigma w(F_o^2 - F_c^2)^2$                                                          |                           |
| Data / restraints / parameters      | 9899 / 252 / 703                                                                     |                           |
| Goodness-of-fit on F <sup>2</sup>   | 1.033                                                                                |                           |
| $\Delta/\sigma_{\text{max}}$        | 0.005                                                                                |                           |
| Final R indices                     | 7966 data; I > 2σ(I)                                                                 | R1 = 0.0317, wR2 = 0.0620 |
|                                     | all data                                                                             | R1 = 0.0476, wR2 = 0.0661 |
| Weighting scheme                    | $w = 1/[\sigma^2(F_o^2) + (0.0284P)^2 + 10.5994P]$<br>where $P = (F_o^2 + 2F_c^2)/3$ |                           |
| Largest diff. peak and hole         | 1.627 and -0.480 eÅ <sup>-3</sup>                                                    |                           |
| R.M.S. deviation from mean          | 0.122 eÅ <sup>-3</sup>                                                               |                           |

**Table S51.** Atomic coordinates and equivalent isotropic atomic displacement parameters ( $\text{\AA}^2$ ) for  $[\text{Cu}_2(\text{o-phen})_2(\text{H}_2\text{O})_2(1,4\text{-HO}_3\text{PC}_8\text{H}_8\text{PO}_3\text{H})][\text{Cu}(\text{o-phen})(\text{H}_2\text{O})\text{Mo}_5\text{O}_{14}(\text{OH})(1,4\text{-O}_3\text{PC}_8\text{H}_8\text{O}_3\text{P})_2]$  (7).

U(eq) is defined as one third of the trace of the orthogonalized  $U_{ij}$  tensor.

|     | x/a        | y/b         | z/c         | U(eq)       |
|-----|------------|-------------|-------------|-------------|
| Mo1 | 0.40593(2) | 0.57178(4)  | 0.27422(2)  | 0.00991(8)  |
| Mo2 | 0.39149(2) | 0.31642(4)  | 0.38596(2)  | 0.01020(8)  |
| Mo3 | 0.32635(2) | 0.30677(4)  | 0.40175(2)  | 0.00982(8)  |
| Mo4 | 0.30417(2) | 0.50314(4)  | 0.24442(2)  | 0.00934(8)  |
| Mo5 | 0.35344(2) | 0.69458(3)  | 0.19184(2)  | 0.00916(8)  |
| Cu1 | 0.46926(2) | 0.36339(5)  | 0.07308(3)  | 0.01019(11) |
| Cu2 | 0.31561(2) | 0.26293(5)  | 0.11493(2)  | 0.01055(11) |
| P1  | 0.49304(2) | 0.38306(10) | 0.91299(5)  | 0.0098(2)   |
| P2  | 0.35899(2) | 0.32977(10) | 0.23506(5)  | 0.0081(2)   |
| P3  | 0.35277(2) | 0.38662(10) | 0.86870(5)  | 0.0087(2)   |
| O1  | 0.43789(5) | 0.5078(3)   | 0.06614(16) | 0.0191(7)   |
| O2  | 0.47609(5) | 0.4023(3)   | 0.97430(14) | 0.0125(6)   |
| O3  | 0.47758(5) | 0.3183(3)   | 0.84802(15) | 0.0143(6)   |
| O4  | 0.50511(5) | 0.5148(3)   | 0.88682(14) | 0.0121(6)   |
| O5  | 0.42225(5) | 0.5542(3)   | 0.19842(15) | 0.0179(6)   |
| O6  | 0.42635(5) | 0.6548(3)   | 0.33165(15) | 0.0165(6)   |
| O7  | 0.40868(5) | 0.3809(3)   | 0.30746(14) | 0.0116(6)   |
| O8  | 0.37157(5) | 0.4664(3)   | 0.21442(14) | 0.0105(6)   |

|     | <b>x/a</b> | <b>y/b</b> | <b>z/c</b>  | <b>U(eq)</b> |
|-----|------------|------------|-------------|--------------|
| O9  | 0.38380(5) | 0.7167(3)  | 0.24822(14) | 0.0111(6)    |
| O10 | 0.36377(5) | 0.6921(3)  | 0.10625(14) | 0.0156(6)    |
| O11 | 0.34250(5) | 0.8582(3)  | 0.20396(14) | 0.0139(6)    |
| O12 | 0.32267(5) | 0.5953(3)  | 0.17189(14) | 0.0101(6)    |
| O13 | 0.28554(5) | 0.6296(3)  | 0.27626(15) | 0.0162(6)    |
| O14 | 0.28460(5) | 0.4086(3)  | 0.18927(14) | 0.0128(6)    |
| O15 | 0.30700(4) | 0.3862(3)  | 0.32778(14) | 0.0107(6)    |
| O16 | 0.35784(5) | 0.3118(3)  | 0.31745(13) | 0.0093(5)    |
| O17 | 0.32352(5) | 0.1337(3)  | 0.38299(14) | 0.0161(6)    |
| O18 | 0.30967(5) | 0.3238(3)  | 0.47614(15) | 0.0166(6)    |
| O19 | 0.36092(5) | 0.2962(3)  | 0.44992(14) | 0.0121(6)    |
| O20 | 0.40977(5) | 0.3637(3)  | 0.45756(14) | 0.0159(6)    |
| O21 | 0.39645(5) | 0.1434(3)  | 0.37491(15) | 0.0161(6)    |
| O22 | 0.33221(5) | 0.3252(3)  | 0.20531(13) | 0.0095(5)    |
| O23 | 0.32865(6) | 0.4205(3)  | 0.06470(15) | 0.0161(6)    |
| O24 | 0.33697(4) | 0.4640(3)  | 0.92167(13) | 0.0092(6)    |
| O25 | 0.33916(5) | 0.3868(3)  | 0.79512(13) | 0.0093(6)    |
| O26 | 0.37876(5) | 0.4550(3)  | 0.86526(13) | 0.0092(6)    |
| N1  | 0.44889(6) | 0.1946(3)  | 0.04769(17) | 0.0118(7)    |
| N2  | 0.46315(6) | 0.2934(3)  | 0.17253(17) | 0.0111(7)    |
| N3  | 0.29337(6) | 0.2040(3)  | 0.03308(17) | 0.0112(7)    |

|     | <b>x/a</b> | <b>y/b</b> | <b>z/c</b>  | <b>U(eq)</b> |
|-----|------------|------------|-------------|--------------|
| N4  | 0.29925(6) | 0.1072(3)  | 0.16397(17) | 0.0106(7)    |
| C1  | 0.44043(7) | 0.1554(4)  | 0.9841(2)   | 0.0181(9)    |
| C2  | 0.42593(8) | 0.0349(5)  | 0.9741(2)   | 0.0213(10)   |
| C3  | 0.42033(8) | 0.9542(5)  | 0.0317(2)   | 0.0199(10)   |
| C4  | 0.42883(7) | 0.9940(4)  | 0.1002(2)   | 0.0141(8)    |
| C5  | 0.44271(7) | 0.1164(4)  | 0.1051(2)   | 0.0114(8)    |
| C6  | 0.42363(8) | 0.9209(4)  | 0.1647(2)   | 0.0197(9)    |
| C7  | 0.43147(7) | 0.9687(4)  | 0.2288(2)   | 0.0186(9)    |
| C8  | 0.44507(7) | 0.0981(4)  | 0.2352(2)   | 0.0146(9)    |
| C9  | 0.45063(7) | 0.1699(4)  | 0.1728(2)   | 0.0120(8)    |
| C10 | 0.45273(7) | 0.1596(4)  | 0.3002(2)   | 0.0170(9)    |
| C11 | 0.46468(7) | 0.2862(4)  | 0.2996(2)   | 0.0149(9)    |
| C12 | 0.46956(7) | 0.3507(4)  | 0.2346(2)   | 0.0134(8)    |
| C13 | 0.29028(7) | 0.2592(4)  | 0.9687(2)   | 0.0134(8)    |
| C14 | 0.27270(7) | 0.2077(4)  | 0.9193(2)   | 0.0153(9)    |
| C15 | 0.25816(8) | 0.0966(5)  | 0.9361(2)   | 0.0190(9)    |
| C16 | 0.26098(7) | 0.0351(4)  | 0.0041(2)   | 0.0148(9)    |
| C17 | 0.24564(8) | 0.9251(5)  | 0.0296(2)   | 0.0209(10)   |
| C18 | 0.24782(7) | 0.8799(5)  | 0.0977(2)   | 0.0198(9)    |
| C19 | 0.26602(7) | 0.9395(4)  | 0.1467(2)   | 0.0140(8)    |
| C20 | 0.27872(7) | 0.0946(4)  | 0.0508(2)   | 0.0124(8)    |



|     | <b>x/a</b> | <b>y/b</b> | <b>z/c</b> | <b>U(eq)</b> |
|-----|------------|------------|------------|--------------|
| C21 | 0.28144(7) | 0.0442(4)  | 0.1224(2)  | 0.0113(8)    |
| C22 | 0.26894(7) | 0.9018(4)  | 0.2193(2)  | 0.0173(9)    |
| C23 | 0.28696(8) | 0.9652(5)  | 0.2603(2)  | 0.0198(10)   |
| C24 | 0.30178(7) | 0.0678(4)  | 0.2310(2)  | 0.0137(9)    |
| C25 | 0.51671(7) | 0.2544(4)  | 0.9310(2)  | 0.0171(9)    |
| C26 | 0.50821(7) | 0.1224(4)  | 0.9658(2)  | 0.0132(8)    |
| C27 | 0.49859(7) | 0.0113(4)  | 0.9262(2)  | 0.0160(9)    |
| C28 | 0.49070(7) | 0.8913(4)  | 0.9605(2)  | 0.0154(9)    |
| C29 | 0.37569(7) | 0.1836(4)  | 0.2013(2)  | 0.0116(8)    |
| C30 | 0.37312(7) | 0.1781(4)  | 0.1208(2)  | 0.0102(8)    |
| C31 | 0.38628(7) | 0.2719(4)  | 0.0798(2)  | 0.0123(8)    |
| C32 | 0.38207(7) | 0.2783(4)  | 0.0068(2)  | 0.0124(8)    |
| C33 | 0.35648(7) | 0.0875(4)  | 0.0872(2)  | 0.0111(8)    |
| C34 | 0.35198(7) | 0.0949(4)  | 0.0137(2)  | 0.0116(8)    |
| C35 | 0.36434(7) | 0.1927(4)  | 0.9733(2)  | 0.0103(8)    |
| C36 | 0.35765(7) | 0.2078(4)  | 0.8945(2)  | 0.0113(8)    |

**Table S52.** Bond lengths (Å) for [Cu<sub>2</sub>(o-phen)<sub>2</sub>(H<sub>2</sub>O)<sub>2</sub>(1,4-HO<sub>3</sub>PC<sub>8</sub>H<sub>8</sub>PO<sub>3</sub>H)][Cu(o-phen)(H<sub>2</sub>O)Mo<sub>5</sub>O<sub>14</sub>(OH)(1,4-O<sub>3</sub>PC<sub>8</sub>H<sub>8</sub>O<sub>3</sub>P)]<sub>2</sub> (7).

|         |          |         |          |
|---------|----------|---------|----------|
| Mo1-O5  | 1.703(3) | Mo1-O6  | 1.715(3) |
| Mo1-O9  | 1.886(3) | Mo1-O7  | 1.938(3) |
| Mo1-O26 | 2.296(3) | Mo1-O8  | 2.365(2) |
| Mo2-O21 | 1.693(3) | Mo2-O20 | 1.706(3) |
| Mo2-O7  | 1.868(3) | Mo2-O19 | 2.075(3) |
| Mo2-O16 | 2.195(2) | Mo2-O26 | 2.326(3) |
| Mo3-O18 | 1.690(3) | Mo3-O17 | 1.702(3) |
| Mo3-O15 | 1.875(2) | Mo3-O19 | 2.051(3) |
| Mo3-O24 | 2.298(3) | Mo3-O16 | 2.353(3) |
| Mo4-O13 | 1.693(3) | Mo4-O14 | 1.716(3) |
| Mo4-O12 | 1.925(3) | Mo4-O15 | 1.928(3) |
| Mo4-O25 | 2.340(2) | Mo4-O22 | 2.407(3) |
| Mo5-O11 | 1.693(3) | Mo5-O10 | 1.716(3) |
| Mo5-O9  | 1.935(3) | Mo5-O12 | 1.939(3) |
| Mo5-O25 | 2.246(3) | Mo5-O8  | 2.427(3) |
| Cu1-O2  | 1.938(3) | Cu1-O4  | 1.945(3) |
| Cu1-N1  | 2.005(3) | Cu1-N2  | 2.021(3) |
| Cu1-O1  | 2.186(3) | Cu2-O23 | 1.924(3) |
| Cu2-N4  | 1.975(3) | Cu2-O22 | 1.988(3) |
| Cu2-N3  | 2.004(3) | P1-O2   | 1.501(3) |

|          |           |          |           |
|----------|-----------|----------|-----------|
| P1-O4    | 1.508(3)  | P1-O3    | 1.585(3)  |
| P1-C25   | 1.799(4)  | P2-O8    | 1.530(3)  |
| P2-O22   | 1.533(3)  | P2-O16   | 1.560(3)  |
| P2-C29   | 1.791(4)  | P3-O24   | 1.520(3)  |
| P3-O25   | 1.546(3)  | P3-O26   | 1.549(3)  |
| P3-C36   | 1.798(4)  | O1-H1A   | 0.816(19) |
| O1-H1B   | 0.821(19) | O3-H3'   | 0.815(19) |
| O4-Cu1   | 1.945(3)  | O19-H19' | 0.820(19) |
| O23-H23A | 0.821(19) | O23-H23B | 0.818(19) |
| O24-Mo3  | 2.298(3)  | O25-Mo5  | 2.246(3)  |
| O25-Mo4  | 2.340(2)  | O26-Mo1  | 2.296(3)  |
| O26-Mo2  | 2.325(3)  | N1-C1    | 1.322(5)  |
| N1-C5    | 1.362(5)  | N2-C12   | 1.325(5)  |
| N2-C9    | 1.362(5)  | N3-C13   | 1.327(5)  |
| N3-C20   | 1.360(5)  | N4-C24   | 1.317(5)  |
| N4-C21   | 1.362(5)  | C1-C2    | 1.404(6)  |
| C1-H1    | 0.95      | C2-C3    | 1.370(6)  |
| C2-H2    | 0.95      | C3-C4    | 1.406(6)  |
| C3-H3    | 0.95      | C4-C5    | 1.393(5)  |
| C4-C6    | 1.434(6)  | C5-C9    | 1.427(6)  |
| C6-C7    | 1.345(6)  | C6-H6    | 0.95      |
| C7-C8    | 1.444(6)  | C7-H7    | 0.95      |

|          |          |          |          |
|----------|----------|----------|----------|
| C8-C9    | 1.398(6) | C8-C10   | 1.408(6) |
| C10-C11  | 1.374(6) | C10-H10  | 0.95     |
| C11-C12  | 1.400(6) | C11-H11  | 0.95     |
| C12-H12  | 0.95     | C13-C14  | 1.398(5) |
| C13-H13  | 0.95     | C14-C15  | 1.364(6) |
| C14-H14  | 0.95     | C15-C16  | 1.412(6) |
| C15-H15  | 0.95     | C16-C20  | 1.400(5) |
| C16-C17  | 1.431(6) | C17-C18  | 1.351(6) |
| C17-H17  | 0.95     | C18-C19  | 1.444(6) |
| C18-H18  | 0.95     | C19-C21  | 1.388(5) |
| C19-C22  | 1.416(6) | C20-C21  | 1.432(5) |
| C22-C23  | 1.365(6) | C22-H22  | 0.95     |
| C23-C24  | 1.391(6) | C23-H23  | 0.95     |
| C24-H24  | 0.95     | C25-C26  | 1.501(6) |
| C25-H25A | 0.99     | C25-H25B | 0.99     |
| C26-C28  | 1.391(6) | C26-C27  | 1.391(6) |
| C27-C28  | 1.391(6) | C27-H27  | 0.95     |
| C28-C26  | 1.391(6) | C28-H28  | 0.95     |
| C29-C30  | 1.517(5) | C29-H29A | 0.99     |
| C29-H29B | 0.99     | C30-C33  | 1.387(5) |
| C30-C31  | 1.390(5) | C31-C32  | 1.384(5) |
| C31-H31  | 0.95     | C32-C35  | 1.396(5) |

|          |      |          |          |
|----------|------|----------|----------|
| C32-H32  | 0.95 | C33-C34  | 1.398(5) |
| C33-H33  | 0.95 | C34-C35  | 1.387(5) |
| C34-H34  | 0.95 | C35-C36  | 1.520(5) |
| C36-H36A | 0.99 | C36-H36B | 0.99     |

**Table S53.** Bond angles (°) for [Cu<sub>2</sub>(o-phen)<sub>2</sub>(H<sub>2</sub>O)<sub>2</sub>(1,4-HO<sub>3</sub>PC<sub>8</sub>H<sub>8</sub>PO<sub>3</sub>H)][Cu(o-phen)(H<sub>2</sub>O)Mo<sub>5</sub>O<sub>14</sub>(OH)(1,4-O<sub>3</sub>PC<sub>8</sub>H<sub>8</sub>O<sub>3</sub>P)]<sub>2</sub> (7).

|             |            |             |            |
|-------------|------------|-------------|------------|
| O5-Mo1-O6   | 103.55(13) | O5-Mo1-O9   | 101.19(12) |
| O6-Mo1-O9   | 102.20(12) | O5-Mo1-O7   | 97.99(12)  |
| O6-Mo1-O7   | 101.15(12) | O9-Mo1-O7   | 145.19(11) |
| O5-Mo1-O26  | 165.15(12) | O6-Mo1-O26  | 89.70(11)  |
| O9-Mo1-O26  | 82.15(10)  | O7-Mo1-O26  | 72.50(10)  |
| O5-Mo1-O8   | 88.64(11)  | O6-Mo1-O8   | 167.67(12) |
| O9-Mo1-O8   | 73.16(10)  | O7-Mo1-O8   | 78.57(10)  |
| O26-Mo1-O8  | 78.42(9)   | O21-Mo2-O20 | 105.50(13) |
| O21-Mo2-O7  | 98.26(13)  | O20-Mo2-O7  | 104.25(12) |
| O21-Mo2-O19 | 96.31(12)  | O20-Mo2-O19 | 91.07(12)  |
| O7-Mo2-O19  | 155.11(11) | O21-Mo2-O16 | 92.23(11)  |
| O20-Mo2-O16 | 156.51(12) | O7-Mo2-O16  | 87.91(10)  |
| O19-Mo2-O16 | 71.42(10)  | O21-Mo2-O26 | 161.63(11) |
| O20-Mo2-O26 | 92.44(11)  | O7-Mo2-O26  | 72.95(10)  |
| O19-Mo2-O26 | 87.12(10)  | O16-Mo2-O26 | 71.70(9)   |
| O18-Mo3-O17 | 102.63(14) | O18-Mo3-O15 | 106.02(12) |
| O17-Mo3-O15 | 101.41(12) | O18-Mo3-O19 | 97.89(12)  |
| O17-Mo3-O19 | 96.79(12)  | O15-Mo3-O19 | 145.74(11) |
| O18-Mo3-O24 | 84.77(12)  | O17-Mo3-O24 | 170.38(11) |
| O15-Mo3-O24 | 82.14(10)  | O19-Mo3-O24 | 75.90(10)  |

|             |            |             |            |
|-------------|------------|-------------|------------|
| O18-Mo3-O16 | 164.62(11) | O17-Mo3-O16 | 86.72(11)  |
| O15-Mo3-O16 | 83.66(10)  | O19-Mo3-O16 | 68.58(10)  |
| O24-Mo3-O16 | 84.78(9)   | O13-Mo4-O14 | 103.34(13) |
| O13-Mo4-O12 | 104.20(12) | O14-Mo4-O12 | 97.86(12)  |
| O13-Mo4-O15 | 99.41(12)  | O14-Mo4-O15 | 102.53(12) |
| O12-Mo4-O15 | 144.14(10) | O13-Mo4-O25 | 90.72(11)  |
| O14-Mo4-O25 | 163.40(11) | O12-Mo4-O25 | 69.74(10)  |
| O15-Mo4-O25 | 83.49(10)  | O13-Mo4-O22 | 176.62(11) |
| O14-Mo4-O22 | 79.74(11)  | O12-Mo4-O22 | 76.55(10)  |
| O15-Mo4-O22 | 78.45(10)  | O25-Mo4-O22 | 86.46(9)   |
| O11-Mo5-O10 | 105.19(13) | O11-Mo5-O9  | 96.73(12)  |
| O10-Mo5-O9  | 102.89(12) | O11-Mo5-O12 | 100.45(12) |
| O10-Mo5-O12 | 96.31(12)  | O9-Mo5-O12  | 149.84(11) |
| O11-Mo5-O25 | 94.38(11)  | O10-Mo5-O25 | 158.76(12) |
| O9-Mo5-O25  | 82.53(10)  | O12-Mo5-O25 | 71.65(10)  |
| O11-Mo5-O8  | 161.96(11) | O10-Mo5-O8  | 90.68(11)  |
| O9-Mo5-O8   | 70.91(10)  | O12-Mo5-O8  | 85.97(9)   |
| O25-Mo5-O8  | 71.48(9)   | O2-Cu1-O4   | 95.94(11)  |
| O2-Cu1-N1   | 92.58(12)  | O4-Cu1-N1   | 162.74(12) |
| O2-Cu1-N2   | 171.62(12) | O4-Cu1-N2   | 88.48(12)  |
| N1-Cu1-N2   | 81.36(13)  | O2-Cu1-O1   | 89.32(11)  |
| O4-Cu1-O1   | 100.52(12) | N1-Cu1-O1   | 94.55(13)  |

|              |            |              |            |
|--------------|------------|--------------|------------|
| N2-Cu1-O1    | 96.89(12)  | O23-Cu2-N4   | 174.90(13) |
| O23-Cu2-O22  | 91.23(11)  | N4-Cu2-O22   | 91.40(12)  |
| O23-Cu2-N3   | 93.65(13)  | N4-Cu2-N3    | 83.09(13)  |
| O22-Cu2-N3   | 169.97(12) | O2-P1-O4     | 115.09(16) |
| O2-P1-O3     | 108.72(15) | O4-P1-O3     | 107.39(15) |
| O2-P1-C25    | 112.55(18) | O4-P1-C25    | 108.97(17) |
| O3-P1-C25    | 103.36(18) | O8-P2-O22    | 110.58(15) |
| O8-P2-O16    | 112.08(15) | O22-P2-O16   | 107.19(15) |
| O8-P2-C29    | 110.47(17) | O22-P2-C29   | 109.02(17) |
| O16-P2-C29   | 107.36(16) | O24-P3-O25   | 108.91(14) |
| O24-P3-O26   | 110.14(15) | O25-P3-O26   | 111.68(14) |
| O24-P3-C36   | 111.62(17) | O25-P3-C36   | 107.71(16) |
| O26-P3-C36   | 106.78(16) | Cu1-O1-H1A   | 132.(3)    |
| Cu1-O1-H1B   | 122.(3)    | H1A-O1-H1B   | 105.(5)    |
| P1-O2-Cu1    | 147.86(17) | P1-O3-H3'    | 120.(3)    |
| P1-O4-Cu1    | 133.18(16) | Mo2-O7-Mo1   | 122.10(14) |
| P2-O8-Mo1    | 126.29(14) | P2-O8-Mo5    | 129.52(14) |
| Mo1-O8-Mo5   | 90.25(9)   | Mo1-O9-Mo5   | 125.44(14) |
| Mo4-O12-Mo5  | 123.04(13) | Mo3-O15-Mo4  | 150.19(14) |
| P2-O16-Mo2   | 121.65(14) | P2-O16-Mo3   | 135.96(14) |
| Mo2-O16-Mo3  | 101.85(10) | Mo3-O19-Mo2  | 117.77(13) |
| Mo3-O19-H19' | 121.(3)    | Mo2-O19-H19' | 116.(3)    |



|              |            |               |            |
|--------------|------------|---------------|------------|
| P2-O22-Cu2   | 135.74(16) | P2-O22-Mo4    | 117.43(14) |
| Cu2-O22-Mo4  | 101.65(10) | Cu2-O23-H23A  | 109.(3)    |
| Cu2-O23-H23B | 136.(3)    | H23A-O23-H23B | 112.(5)    |
| P3-O24-Mo3   | 120.07(15) | P3-O25-Mo5    | 127.31(14) |
| P3-O25-Mo4   | 136.13(15) | Mo5-O25-Mo4   | 95.53(9)   |
| P3-O26-Mo1   | 125.44(14) | P3-O26-Mo2    | 130.87(15) |
| Mo1-O26-Mo2  | 92.20(9)   | C1-N1-C5      | 118.2(3)   |
| C1-N1-Cu1    | 128.1(3)   | C5-N1-Cu1     | 113.6(3)   |
| C12-N2-C9    | 118.3(3)   | C12-N2-Cu1    | 129.0(3)   |
| C9-N2-Cu1    | 112.7(3)   | C13-N3-C20    | 118.2(3)   |
| C13-N3-Cu2   | 130.1(3)   | C20-N3-Cu2    | 111.6(2)   |
| C24-N4-C21   | 118.3(3)   | C24-N4-Cu2    | 128.8(3)   |
| C21-N4-Cu2   | 112.6(3)   | N1-C1-C2      | 122.1(4)   |
| N1-C1-H1     | 119.0      | C2-C1-H1      | 119.0      |
| C3-C2-C1     | 119.5(4)   | C3-C2-H2      | 120.2      |
| C1-C2-H2     | 120.2      | C2-C3-C4      | 119.7(4)   |
| C2-C3-H3     | 120.1      | C4-C3-H3      | 120.1      |
| C5-C4-C3     | 116.7(4)   | C5-C4-C6      | 118.2(4)   |
| C3-C4-C6     | 125.1(4)   | N1-C5-C4      | 123.7(4)   |
| N1-C5-C9     | 115.8(3)   | C4-C5-C9      | 120.6(4)   |
| C7-C6-C4     | 121.7(4)   | C7-C6-H6      | 119.1      |
| C4-C6-H6     | 119.1      | C6-C7-C8      | 120.9(4)   |

|             |          |             |          |
|-------------|----------|-------------|----------|
| C6-C7-H7    | 119.5    | C8-C7-H7    | 119.5    |
| C9-C8-C10   | 117.2(4) | C9-C8-C7    | 118.2(4) |
| C10-C8-C7   | 124.6(4) | N2-C9-C8    | 123.3(4) |
| N2-C9-C5    | 116.4(3) | C8-C9-C5    | 120.3(4) |
| C11-C10-C8  | 119.2(4) | C11-C10-H10 | 120.4    |
| C8-C10-H10  | 120.4    | C10-C11-C12 | 119.8(4) |
| C10-C11-H11 | 120.1    | C12-C11-H11 | 120.1    |
| N2-C12-C11  | 122.2(4) | N2-C12-H12  | 118.9    |
| C11-C12-H12 | 118.9    | N3-C13-C14  | 122.0(4) |
| N3-C13-H13  | 119.0    | C14-C13-H13 | 119.0    |
| C15-C14-C13 | 120.3(4) | C15-C14-H14 | 119.8    |
| C13-C14-H14 | 119.8    | C14-C15-C16 | 119.2(4) |
| C14-C15-H15 | 120.4    | C16-C15-H15 | 120.4    |
| C20-C16-C15 | 116.8(4) | C20-C16-C17 | 118.7(4) |
| C15-C16-C17 | 124.2(4) | C18-C17-C16 | 121.1(4) |
| C18-C17-H17 | 119.4    | C16-C17-H17 | 119.4    |
| C17-C18-C19 | 121.1(4) | C17-C18-H18 | 119.5    |
| C19-C18-H18 | 119.5    | C21-C19-C22 | 116.7(4) |
| C21-C19-C18 | 118.6(4) | C22-C19-C18 | 124.7(4) |
| N3-C20-C16  | 123.5(4) | N3-C20-C21  | 116.4(3) |
| C16-C20-C21 | 120.1(4) | N4-C21-C19  | 123.4(4) |
| N4-C21-C20  | 116.2(3) | C19-C21-C20 | 120.4(4) |

|               |          |               |          |
|---------------|----------|---------------|----------|
| C23-C22-C19   | 119.2(4) | C23-C22-H22   | 120.4    |
| C19-C22-H22   | 120.4    | C22-C23-C24   | 119.9(4) |
| C22-C23-H23   | 120.1    | C24-C23-H23   | 120.1    |
| N4-C24-C23    | 122.4(4) | N4-C24-H24    | 118.8    |
| C23-C24-H24   | 118.8    | C26-C25-P1    | 115.8(3) |
| C26-C25-H25A  | 108.3    | P1-C25-H25A   | 108.3    |
| C26-C25-H25B  | 108.3    | P1-C25-H25B   | 108.3    |
| H25A-C25-H25B | 107.4    | C28-C26-C27   | 117.7(4) |
| C28-C26-C25   | 120.6(4) | C27-C26-C25   | 121.7(4) |
| C28-C27-C26   | 120.0(4) | C28-C27-H27   | 120.0    |
| C26-C27-H27   | 120.0    | C26-C28-C27   | 122.3(4) |
| C26-C28-H28   | 118.9    | C27-C28-H28   | 118.9    |
| C30-C29-P2    | 110.3(3) | C30-C29-H29A  | 109.6    |
| P2-C29-H29A   | 109.6    | C30-C29-H29B  | 109.6    |
| P2-C29-H29B   | 109.6    | H29A-C29-H29B | 108.1    |
| C33-C30-C31   | 119.1(4) | C33-C30-C29   | 121.0(3) |
| C31-C30-C29   | 119.7(3) | C32-C31-C30   | 120.3(4) |
| C32-C31-H31   | 119.8    | C30-C31-H31   | 119.8    |
| C31-C32-C35   | 120.8(4) | C31-C32-H32   | 119.6    |
| C35-C32-H32   | 119.6    | C30-C33-C34   | 120.6(4) |
| C30-C33-H33   | 119.7    | C34-C33-H33   | 119.7    |
| C35-C34-C33   | 120.1(4) | C35-C34-H34   | 119.9    |

|             |          |               |          |
|-------------|----------|---------------|----------|
| C33-C34-H34 | 119.9    | C34-C35-C32   | 118.9(3) |
| C34-C35-C36 | 119.5(3) | C32-C35-C36   | 121.6(3) |
| C35-C36-P3  | 112.5(3) | C35-C36-H36A  | 109.1    |
| P3-C36-H36A | 109.1    | C35-C36-H36B  | 109.1    |
| P3-C36-H36B | 109.1    | H36A-C36-H36B | 107.8    |

**Table S54.** Anisotropic atomic displacement parameters ( $\text{\AA}^2$ ) for  $[\text{Cu}_2(\text{o-phen})_2(\text{H}_2\text{O})_2(1,4\text{-HO}_3\text{PC}_8\text{H}_8\text{PO}_3\text{H})][\text{Cu}(\text{o-phen})(\text{H}_2\text{O})\text{Mo}_5\text{O}_{14}(\text{OH})(1,4\text{-O}_3\text{PC}_8\text{H}_8\text{O}_3\text{P})]_2$  (**7**).

The anisotropic atomic displacement factor exponent takes the form:  $-2\pi^2 [ h^2 a^{*2} U_{11} + \dots + 2 h k a^* b^* U_{12} ]$

|     | $U_{11}$    | $U_{22}$    | $U_{33}$    | $U_{23}$    | $U_{13}$     | $U_{12}$     |
|-----|-------------|-------------|-------------|-------------|--------------|--------------|
| Mo1 | 0.00969(16) | 0.01294(18) | 0.00717(17) | 0.00018(14) | 0.00111(13)  | -0.00001(14) |
| Mo2 | 0.01079(16) | 0.01254(18) | 0.00715(17) | 0.00091(14) | -0.00224(13) | 0.00190(14)  |
| Mo3 | 0.01121(16) | 0.01161(18) | 0.00662(17) | 0.00198(14) | -0.00015(13) | -0.00051(14) |
| Mo4 | 0.00977(16) | 0.01099(17) | 0.00722(17) | 0.00130(14) | -0.00070(13) | 0.00114(13)  |
| Mo5 | 0.01187(16) | 0.00983(17) | 0.00580(17) | 0.00177(14) | 0.00062(13)  | 0.00011(13)  |
| Cu1 | 0.0116(2)   | 0.0098(2)   | 0.0091(3)   | 0.00094(19) | -0.00066(19) | -0.00272(19) |
| Cu2 | 0.0133(2)   | 0.0117(3)   | 0.0066(2)   | 0.00136(19) | -0.00186(19) | -0.00342(19) |
| P1  | 0.0125(5)   | 0.0084(5)   | 0.0083(5)   | 0.0005(4)   | -0.0006(4)   | -0.0027(4)   |
| P2  | 0.0097(5)   | 0.0088(5)   | 0.0057(5)   | -0.0003(4)  | -0.0008(4)   | 0.0011(4)    |
| P3  | 0.0113(5)   | 0.0097(5)   | 0.0050(5)   | 0.0004(4)   | 0.0007(4)    | -0.0006(4)   |
| O1  | 0.0187(16)  | 0.0302(18)  | 0.0083(16)  | -0.0005(14) | 0.0006(12)   | 0.0104(14)   |
| O2  | 0.0146(14)  | 0.0150(15)  | 0.0079(14)  | -0.0014(11) | 0.0002(11)   | -0.0018(11)  |
| O3  | 0.0140(14)  | 0.0158(15)  | 0.0130(15)  | -0.0047(12) | -0.0008(12)  | -0.0034(12)  |
| O4  | 0.0136(13)  | 0.0112(14)  | 0.0115(15)  | 0.0033(11)  | -0.0015(11)  | -0.0051(11)  |
| O5  | 0.0167(14)  | 0.0211(16)  | 0.0162(16)  | 0.0017(13)  | 0.0052(12)   | 0.0040(12)   |
| O6  | 0.0150(14)  | 0.0215(16)  | 0.0131(15)  | -0.0011(12) | -0.0001(12)  | -0.0019(12)  |
| O7  | 0.0109(13)  | 0.0139(14)  | 0.0099(14)  | 0.0005(11)  | 0.0003(11)   | 0.0037(11)   |
| O8  | 0.0115(13)  | 0.0120(14)  | 0.0079(14)  | 0.0008(11)  | -0.0002(11)  | 0.0009(11)   |

|     | <b>U<sub>11</sub></b> | <b>U<sub>22</sub></b> | <b>U<sub>33</sub></b> | <b>U<sub>23</sub></b> | <b>U<sub>13</sub></b> | <b>U<sub>12</sub></b> |
|-----|-----------------------|-----------------------|-----------------------|-----------------------|-----------------------|-----------------------|
| O9  | 0.0145(13)            | 0.0107(14)            | 0.0083(14)            | 0.0001(11)            | 0.0033(11)            | -0.0006(11)           |
| O10 | 0.0171(14)            | 0.0200(16)            | 0.0099(15)            | 0.0033(12)            | 0.0003(11)            | 0.0006(12)            |
| O11 | 0.0174(14)            | 0.0111(14)            | 0.0130(15)            | 0.0022(12)            | -0.0003(12)           | 0.0005(12)            |
| O12 | 0.0125(13)            | 0.0098(14)            | 0.0082(14)            | 0.0011(11)            | -0.0001(11)           | 0.0025(11)            |
| O13 | 0.0167(14)            | 0.0173(15)            | 0.0148(16)            | 0.0014(12)            | 0.0032(12)            | 0.0038(12)            |
| O14 | 0.0121(13)            | 0.0170(15)            | 0.0091(14)            | 0.0029(12)            | -0.0018(11)           | -0.0006(11)           |
| O15 | 0.0090(13)            | 0.0149(15)            | 0.0082(14)            | 0.0018(11)            | 0.0001(11)            | 0.0000(11)            |
| O16 | 0.0120(13)            | 0.0100(14)            | 0.0058(13)            | 0.0001(11)            | -0.0003(10)           | 0.0004(11)            |
| O17 | 0.0235(15)            | 0.0147(15)            | 0.0101(15)            | 0.0037(12)            | -0.0020(12)           | -0.0020(12)           |
| O18 | 0.0162(14)            | 0.0209(16)            | 0.0128(15)            | 0.0046(12)            | 0.0019(12)            | 0.0000(12)            |
| O19 | 0.0171(14)            | 0.0144(15)            | 0.0047(14)            | 0.0008(12)            | -0.0023(11)           | -0.0005(12)           |
| O20 | 0.0171(14)            | 0.0219(16)            | 0.0084(15)            | 0.0024(12)            | -0.0039(12)           | 0.0003(12)            |
| O21 | 0.0170(14)            | 0.0159(15)            | 0.0153(16)            | 0.0017(12)            | -0.0033(12)           | 0.0013(12)            |
| O22 | 0.0131(13)            | 0.0096(14)            | 0.0058(13)            | 0.0006(11)            | 0.0001(10)            | 0.0008(11)            |
| O23 | 0.0300(17)            | 0.0107(15)            | 0.0077(15)            | 0.0003(12)            | 0.0017(13)            | -0.0046(13)           |
| O24 | 0.0103(13)            | 0.0114(14)            | 0.0059(14)            | 0.0003(11)            | -0.0002(10)           | 0.0023(11)            |
| O25 | 0.0125(13)            | 0.0090(14)            | 0.0064(14)            | -0.0005(11)           | 0.0019(11)            | -0.0005(11)           |
| O26 | 0.0107(13)            | 0.0111(14)            | 0.0059(14)            | 0.0006(11)            | 0.0010(11)            | -0.0004(11)           |
| N1  | 0.0108(16)            | 0.0121(17)            | 0.0124(17)            | -0.0040(14)           | 0.0012(13)            | -0.0034(13)           |
| N2  | 0.0086(15)            | 0.0130(17)            | 0.0117(17)            | 0.0019(14)            | -0.0021(13)           | -0.0017(13)           |
| N3  | 0.0103(16)            | 0.0141(18)            | 0.0090(17)            | -0.0005(14)           | -0.0010(13)           | -0.0002(13)           |

|     | $U_{11}$   | $U_{22}$   | $U_{33}$   | $U_{23}$    | $U_{13}$    | $U_{12}$    |
|-----|------------|------------|------------|-------------|-------------|-------------|
| N4  | 0.0120(16) | 0.0105(17) | 0.0092(17) | 0.0001(13)  | 0.0004(13)  | -0.0003(13) |
| C1  | 0.017(2)   | 0.020(2)   | 0.017(2)   | -0.0070(18) | 0.0022(18)  | -0.0020(17) |
| C2  | 0.024(2)   | 0.023(2)   | 0.017(2)   | -0.0112(19) | 0.0026(19)  | -0.0071(19) |
| C3  | 0.018(2)   | 0.017(2)   | 0.024(2)   | -0.0096(19) | 0.0054(18)  | -0.0046(18) |
| C4  | 0.0096(19) | 0.009(2)   | 0.024(2)   | -0.0038(17) | 0.0067(17)  | 0.0007(16)  |
| C5  | 0.0101(18) | 0.0070(19) | 0.017(2)   | 0.0011(16)  | 0.0048(16)  | 0.0017(15)  |
| C6  | 0.019(2)   | 0.010(2)   | 0.030(3)   | 0.0023(18)  | 0.0023(19)  | -0.0042(17) |
| C7  | 0.017(2)   | 0.015(2)   | 0.024(2)   | 0.0065(18)  | 0.0057(18)  | 0.0003(17)  |
| C8  | 0.0093(19) | 0.016(2)   | 0.019(2)   | 0.0051(17)  | 0.0000(17)  | 0.0012(16)  |
| C9  | 0.0074(18) | 0.013(2)   | 0.016(2)   | 0.0027(16)  | 0.0020(16)  | 0.0005(15)  |
| C10 | 0.014(2)   | 0.020(2)   | 0.018(2)   | 0.0089(18)  | 0.0006(17)  | -0.0006(17) |
| C11 | 0.0118(19) | 0.023(2)   | 0.010(2)   | 0.0013(17)  | -0.0024(16) | -0.0009(17) |
| C12 | 0.0103(19) | 0.014(2)   | 0.016(2)   | 0.0034(17)  | -0.0013(16) | 0.0005(16)  |
| C13 | 0.0132(19) | 0.016(2)   | 0.011(2)   | -0.0020(17) | 0.0003(16)  | -0.0001(16) |
| C14 | 0.017(2)   | 0.024(2)   | 0.005(2)   | -0.0007(17) | 0.0015(16)  | 0.0036(18)  |
| C15 | 0.016(2)   | 0.028(3)   | 0.013(2)   | -0.0083(18) | -0.0025(17) | 0.0009(18)  |
| C16 | 0.0094(19) | 0.019(2)   | 0.016(2)   | -0.0068(17) | 0.0019(16)  | 0.0006(16)  |
| C17 | 0.016(2)   | 0.020(2)   | 0.027(3)   | -0.0055(19) | -0.0047(19) | -0.0031(18) |
| C18 | 0.014(2)   | 0.015(2)   | 0.031(3)   | -0.0029(19) | 0.0023(18)  | -0.0047(17) |
| C19 | 0.0093(19) | 0.011(2)   | 0.021(2)   | -0.0023(17) | 0.0021(16)  | -0.0003(16) |
| C20 | 0.0090(18) | 0.015(2)   | 0.013(2)   | -0.0028(16) | -0.0005(15) | 0.0014(15)  |

|     | <b>U<sub>11</sub></b> | <b>U<sub>22</sub></b> | <b>U<sub>33</sub></b> | <b>U<sub>23</sub></b> | <b>U<sub>13</sub></b> | <b>U<sub>12</sub></b> |
|-----|-----------------------|-----------------------|-----------------------|-----------------------|-----------------------|-----------------------|
| C21 | 0.0097(18)            | 0.010(2)              | 0.014(2)              | -0.0025(16)           | 0.0022(16)            | -0.0006(15)           |
| C22 | 0.015(2)              | 0.014(2)              | 0.024(2)              | 0.0087(18)            | 0.0047(17)            | -0.0019(17)           |
| C23 | 0.024(2)              | 0.022(2)              | 0.014(2)              | 0.0034(18)            | 0.0020(18)            | 0.0025(18)            |
| C24 | 0.016(2)              | 0.014(2)              | 0.011(2)              | 0.0009(17)            | -0.0014(16)           | 0.0009(16)            |
| C25 | 0.016(2)              | 0.012(2)              | 0.023(2)              | 0.0032(18)            | 0.0013(18)            | 0.0019(17)            |
| C26 | 0.0098(19)            | 0.0096(19)            | 0.020(2)              | 0.0011(17)            | 0.0021(17)            | 0.0047(16)            |
| C27 | 0.020(2)              | 0.015(2)              | 0.012(2)              | -0.0008(17)           | -0.0008(17)           | 0.0051(17)            |
| C28 | 0.017(2)              | 0.008(2)              | 0.021(2)              | -0.0045(17)           | -0.0031(18)           | 0.0009(16)            |
| C29 | 0.016(2)              | 0.0105(19)            | 0.0081(19)            | 0.0030(16)            | 0.0011(16)            | 0.0014(16)            |
| C30 | 0.0108(18)            | 0.010(2)              | 0.0095(19)            | 0.0009(16)            | 0.0007(15)            | 0.0058(15)            |
| C31 | 0.0128(19)            | 0.013(2)              | 0.011(2)              | -0.0005(16)           | -0.0015(16)           | -0.0012(16)           |
| C32 | 0.015(2)              | 0.013(2)              | 0.009(2)              | 0.0031(16)            | 0.0037(16)            | -0.0014(16)           |
| C33 | 0.0145(19)            | 0.009(2)              | 0.010(2)              | 0.0006(16)            | 0.0056(16)            | 0.0013(15)            |
| C34 | 0.0121(19)            | 0.010(2)              | 0.012(2)              | -0.0018(16)           | 0.0003(16)            | -0.0013(15)           |
| C35 | 0.0149(19)            | 0.010(2)              | 0.0064(19)            | 0.0004(15)            | 0.0006(15)            | 0.0038(16)            |
| C36 | 0.016(2)              | 0.010(2)              | 0.008(2)              | 0.0009(16)            | 0.0020(16)            | -0.0004(16)           |



**Table S55.** Hydrogen atomic coordinates and isotropic atomic displacement parameters ( $\text{\AA}^2$ ) for  $[\text{Cu}_2(\text{o-phen})_2(\text{H}_2\text{O})_2(1,4\text{-HO}_3\text{PC}_8\text{H}_8\text{PO}_3\text{H})][\text{Cu}(\text{o-phen})(\text{H}_2\text{O})\text{Mo}_5\text{O}_{14}(\text{OH})(1,4\text{-O}_3\text{PC}_8\text{H}_8\text{O}_3\text{P})]_2$  (7).

|      | <b>x/a</b> | <b>y/b</b> | <b>z/c</b> | <b>U(eq)</b> |
|------|------------|------------|------------|--------------|
| H1A  | 0.4302(8)  | 0.542(5)   | 0.0324(18) | 0.023        |
| H1B  | 0.4318(8)  | 0.542(5)   | 0.1016(17) | 0.023        |
| H3'  | 0.4628(4)  | 0.335(5)   | -0.156(2)  | 0.017        |
| H19' | 0.3631(8)  | 0.318(4)   | 0.4918(12) | 0.015        |
| H23A | 0.3261(8)  | 0.492(3)   | 0.088(2)   | 0.019        |
| H23B | 0.3318(8)  | 0.438(5)   | 0.0233(12) | 0.019        |
| H1   | 0.4443     | 0.2104     | -0.0562    | 0.022        |
| H2   | 0.4200     | 0.0095     | -0.0722    | 0.026        |
| H3   | 0.4107     | -0.1283    | 0.0254     | 0.024        |
| H6   | 0.4144     | -0.1634    | 0.1621     | 0.024        |
| H7   | 0.4280     | -0.0834    | 0.2703     | 0.022        |
| H10  | 0.4497     | 0.1140     | 0.3440     | 0.02         |
| H11  | 0.4696     | 0.3298     | 0.3431     | 0.018        |
| H12  | 0.4777     | 0.4385     | 0.2349     | 0.016        |
| H13  | 0.3003     | 0.3362     | -0.0443    | 0.016        |
| H14  | 0.2709     | 0.2502     | -0.1263    | 0.018        |
| H15  | 0.2463     | 0.0611     | -0.0976    | 0.023        |
| H17  | 0.2337     | -0.1170    | -0.0018    | 0.025        |
| H18  | 0.2372     | -0.1921    | 0.1135     | 0.024        |

|      | <b>x/a</b> | <b>y/b</b> | <b>z/c</b> | <b>U(eq)</b> |
|------|------------|------------|------------|--------------|
| H22  | 0.2585     | -0.1669    | 0.2393     | 0.021        |
| H23  | 0.2894     | -0.0608    | 0.3088     | 0.024        |
| H24  | 0.3142     | 0.1112     | 0.2603     | 0.016        |
| H25A | 0.5244     | 0.2295     | -0.1146    | 0.021        |
| H25B | 0.5298     | 0.2973     | -0.0381    | 0.021        |
| H27  | 0.4974     | 0.0175     | -0.1243    | 0.019        |
| H28  | 0.4844     | -0.1840    | -0.0675    | 0.018        |
| H29A | 0.3935     | 0.1915     | 0.2157     | 0.014        |
| H29B | 0.3691     | 0.0963     | 0.2219     | 0.014        |
| H31  | 0.3982     | 0.3318     | 0.1020     | 0.015        |
| H32  | 0.3914     | 0.3417     | -0.0207    | 0.015        |
| H33  | 0.3481     | 0.0198     | 0.1145     | 0.013        |
| H34  | 0.3404     | 0.0329     | -0.0087    | 0.014        |
| H36A | 0.3424     | 0.1538     | -0.1165    | 0.014        |
| H36B | 0.3712     | 0.1680     | -0.1337    | 0.014        |

**Table S56.** Sample and crystal data for (H-4,4'-bpy)[{Ni(H-4,4'-bpy)(H<sub>2</sub>O)<sub>4</sub>}Mo<sub>5</sub>O<sub>15</sub>(1,2-O<sub>3</sub>PC<sub>8</sub>H<sub>8</sub>PO<sub>3</sub>)]·4H<sub>2</sub>O (**8**·4H<sub>2</sub>O).

|                        |                                                                                                                                                                                      |                   |
|------------------------|--------------------------------------------------------------------------------------------------------------------------------------------------------------------------------------|-------------------|
| Identification code    | (H-4,4'-bpy)[{Ni(H-4,4'-bpy)(H <sub>2</sub> O) <sub>4</sub> }Mo <sub>5</sub> O <sub>15</sub> (1,2-O <sub>3</sub> PC <sub>8</sub> H <sub>8</sub> PO <sub>3</sub> )]·4H <sub>2</sub> O |                   |
| Chemical formula       | C <sub>28</sub> H <sub>42</sub> Mo <sub>5</sub> N <sub>4</sub> NiO <sub>29</sub> P <sub>2</sub>                                                                                      |                   |
| Formula weight         | 1499.00                                                                                                                                                                              |                   |
| Temperature            | 90(2) K                                                                                                                                                                              |                   |
| Wavelength             | 0.71073 Å                                                                                                                                                                            |                   |
| Crystal size           | 0.086 x 0.170 x 0.400 mm                                                                                                                                                             |                   |
| Crystal system         | Monoclinic                                                                                                                                                                           |                   |
| Space group            | P21/c                                                                                                                                                                                |                   |
| Unit cell dimensions   | a = 15.6642(11) Å                                                                                                                                                                    | α = 90°           |
|                        | b = 17.0366(13) Å                                                                                                                                                                    | β = 110.3660(10)° |
|                        | c = 18.1045(13) Å                                                                                                                                                                    | γ = 90°           |
| Volume                 | 4529.4(6) Å <sup>3</sup>                                                                                                                                                             |                   |
| Z                      | 4                                                                                                                                                                                    |                   |
| Density (calculated)   | 2.198 g/cm <sup>3</sup>                                                                                                                                                              |                   |
| Absorption coefficient | 1.922 mm <sup>-1</sup>                                                                                                                                                               |                   |
| F(000)                 | 2952                                                                                                                                                                                 |                   |

**Table S57.** Data collection and structure refinement for (H-4,4'-bpy)[{Ni(H-4,4'-bpy)(H<sub>2</sub>O)<sub>4</sub>} Mo<sub>5</sub>O<sub>15</sub>(1,2-O<sub>3</sub>PC<sub>8</sub>H<sub>8</sub>PO<sub>3</sub>)]·4H<sub>2</sub>O (**8**·4H<sub>2</sub>O).

|                                     |                                                                                                                         |                           |
|-------------------------------------|-------------------------------------------------------------------------------------------------------------------------|---------------------------|
| Theta range for data collection     | 1.83 to 25.68°                                                                                                          |                           |
| Index ranges                        | -19<=h<=18, -20<=k<=20, -21<=l<=22                                                                                      |                           |
| Reflections collected               | 31509                                                                                                                   |                           |
| Independent reflections             | 8602 [R(int) = 0.0217]                                                                                                  |                           |
| Coverage of independent reflections | 100.0%                                                                                                                  |                           |
| Max. and min. transmission          | 0.8520 and 0.5140                                                                                                       |                           |
| Refinement method                   | Full-matrix least-squares on F <sup>2</sup>                                                                             |                           |
| Refinement program                  | SHELXL-2013 (Sheldrick, 2013)                                                                                           |                           |
| Function minimized                  | $\Sigma w(F_o^2 - F_c^2)^2$                                                                                             |                           |
| Data / restraints / parameters      | 8602 / 10 / 677                                                                                                         |                           |
| Goodness-of-fit on F <sup>2</sup>   | 1.031                                                                                                                   |                           |
| $\Delta/\sigma_{\max}$              | 0.001                                                                                                                   |                           |
| Final R indices                     | 7675 data; I>2 $\sigma$ (I)                                                                                             | R1 = 0.0183, wR2 = 0.0428 |
|                                     | all data                                                                                                                | R1 = 0.0229, wR2 = 0.0448 |
| Weighting scheme                    | w=1/[ $\sigma^2(F_o^2)+(0.0187P)^2+5.9249P$ ]<br>where P=(F <sub>o</sub> <sup>2</sup> +2F <sub>c</sub> <sup>2</sup> )/3 |                           |
| Largest diff. peak and hole         | 0.699 and -0.598 eÅ <sup>-3</sup>                                                                                       |                           |
| R.M.S. deviation from mean          | 0.077 eÅ <sup>-3</sup>                                                                                                  |                           |

**Table S58.** Atomic coordinates and equivalent isotropic atomic displacement parameters ( $\text{\AA}^2$ ) for (H-4,4'-bpy)[{Ni(H-4,4'-bpy)(H<sub>2</sub>O)<sub>4</sub>}Mo<sub>5</sub>O<sub>15</sub>(1,2-O<sub>3</sub>PC<sub>8</sub>H<sub>8</sub>PO<sub>3</sub>)]·4H<sub>2</sub>O (**8**·4H<sub>2</sub>O).

U(eq) is defined as one third of the trace of the orthogonalized U<sub>ij</sub> tensor.

|     | x/a         | y/b         | z/c         | U(eq)       |
|-----|-------------|-------------|-------------|-------------|
| Mo1 | 0.11372(2)  | 0.13930(2)  | 0.92861(2)  | 0.00886(5)  |
| Mo2 | 0.04462(2)  | 0.31458(2)  | 0.97417(2)  | 0.00877(5)  |
| Mo3 | 0.23245(2)  | 0.42683(2)  | 0.05549(2)  | 0.00785(5)  |
| Mo4 | 0.42252(2)  | 0.32077(2)  | 0.07984(2)  | 0.00891(5)  |
| Mo5 | 0.36168(2)  | 0.13227(2)  | 0.03320(2)  | 0.00884(5)  |
| Ni1 | 0.33465(2)  | 0.49020(2)  | 0.26712(2)  | 0.00902(7)  |
| P1  | 0.23556(4)  | 0.29390(3)  | 0.91415(3)  | 0.00821(12) |
| P2  | 0.23390(4)  | 0.23197(3)  | 0.11265(3)  | 0.00771(12) |
| O1  | 0.23896(11) | 0.10683(10) | 0.97377(9)  | 0.0114(3)   |
| O2  | 0.08138(11) | 0.09345(10) | 0.83935(9)  | 0.0121(3)   |
| O3  | 0.17666(11) | 0.22721(9)  | 0.86926(9)  | 0.0113(3)   |
| O4  | 0.02864(11) | 0.22633(9)  | 0.90377(9)  | 0.0111(3)   |
| O5  | 0.06657(11) | 0.08112(10) | 0.98151(10) | 0.0132(4)   |
| O6  | 0.15129(11) | 0.22691(9)  | 0.03412(9)  | 0.0090(3)   |
| O7  | 0.18075(11) | 0.34930(9)  | 0.94900(9)  | 0.0092(3)   |
| O8  | 0.98867(11) | 0.38351(10) | 0.90502(10) | 0.0143(4)   |
| O9  | 0.96831(11) | 0.28808(10) | 0.01730(10) | 0.0149(4)   |
| O10 | 0.12084(11) | 0.38176(9)  | 0.05773(9)  | 0.0094(3)   |

|     | <b>x/a</b>  | <b>y/b</b>  | <b>z/c</b>  | <b>U(eq)</b> |
|-----|-------------|-------------|-------------|--------------|
| O11 | 0.19580(12) | 0.50927(10) | 0.00068(10) | 0.0133(4)    |
| O12 | 0.29080(11) | 0.30612(9)  | 0.11437(9)  | 0.0088(3)    |
| O13 | 0.34502(11) | 0.41092(9)  | 0.03807(9)  | 0.0102(3)    |
| O14 | 0.27036(11) | 0.46198(9)  | 0.15147(9)  | 0.0104(3)    |
| O15 | 0.47690(11) | 0.35184(10) | 0.17561(10) | 0.0139(4)    |
| O16 | 0.49897(12) | 0.33961(10) | 0.03445(11) | 0.0172(4)    |
| O17 | 0.43989(11) | 0.20974(9)  | 0.10038(9)  | 0.0106(3)    |
| O18 | 0.32012(11) | 0.26109(9)  | 0.98018(9)  | 0.0100(3)    |
| O19 | 0.40756(11) | 0.12457(10) | 0.95929(10) | 0.0136(4)    |
| O20 | 0.40210(11) | 0.04848(10) | 0.08589(10) | 0.0136(4)    |
| O21 | 0.28973(11) | 0.15720(9)  | 0.12097(9)  | 0.0097(3)    |
| O22 | 0.35097(13) | 0.37138(11) | 0.29573(12) | 0.0173(4)    |
| O23 | 0.45700(12) | 0.48569(12) | 0.25107(11) | 0.0154(4)    |
| O24 | 0.41047(13) | 0.51558(11) | 0.38475(10) | 0.0129(4)    |
| O25 | 0.21502(13) | 0.48835(11) | 0.29081(12) | 0.0165(4)    |
| O90 | 0.39587(15) | 0.51311(12) | 0.93275(12) | 0.0270(5)    |
| O91 | 0.06509(13) | 0.46705(11) | 0.16265(11) | 0.0172(4)    |
| O92 | 0.43625(14) | 0.22607(13) | 0.27870(13) | 0.0285(5)    |
| O93 | 0.53195(15) | 0.56976(13) | 0.16777(14) | 0.0305(5)    |
| N1  | 0.30976(13) | 0.60891(12) | 0.23993(11) | 0.0109(4)    |
| N2  | 0.22089(15) | 0.00332(12) | 0.12687(13) | 0.0163(5)    |

|     | <b>x/a</b>  | <b>y/b</b>  | <b>z/c</b>  | <b>U(eq)</b> |
|-----|-------------|-------------|-------------|--------------|
| N3  | 0.58696(17) | 0.27022(17) | 0.40881(16) | 0.0321(6)    |
| N4  | 0.9834(2)   | 0.24759(17) | 0.74567(15) | 0.0428(8)    |
| C1  | 0.27312(16) | 0.15064(14) | 0.34672(13) | 0.0100(5)    |
| C2  | 0.19230(16) | 0.12057(14) | 0.27944(14) | 0.0101(5)    |
| C3  | 0.15336(17) | 0.04939(14) | 0.29097(14) | 0.0139(5)    |
| C4  | 0.07563(18) | 0.02012(15) | 0.23449(15) | 0.0164(5)    |
| C5  | 0.03468(17) | 0.06133(15) | 0.16463(15) | 0.0155(5)    |
| C6  | 0.07223(17) | 0.13154(15) | 0.15224(14) | 0.0141(5)    |
| C7  | 0.15084(16) | 0.16209(14) | 0.20858(14) | 0.0105(5)    |
| C8  | 0.18865(16) | 0.23927(13) | 0.19152(13) | 0.0099(5)    |
| C9  | 0.24408(17) | 0.63005(14) | 0.17198(14) | 0.0130(5)    |
| C10 | 0.35263(17) | 0.66648(14) | 0.28967(15) | 0.0137(5)    |
| C11 | 0.22130(17) | 0.70757(14) | 0.15153(15) | 0.0135(5)    |
| C12 | 0.33320(17) | 0.74575(14) | 0.27345(15) | 0.0147(5)    |
| C13 | 0.26671(16) | 0.76749(14) | 0.20207(14) | 0.0122(5)    |
| C14 | 0.24778(17) | 0.85133(14) | 0.17884(14) | 0.0129(5)    |
| C15 | 0.16607(17) | 0.87396(15) | 0.12082(15) | 0.0156(5)    |
| C16 | 0.31353(17) | 0.90883(15) | 0.21252(15) | 0.0155(5)    |
| C17 | 0.15397(17) | 0.95064(15) | 0.09524(15) | 0.0172(5)    |
| C18 | 0.29827(18) | 0.98482(15) | 0.18520(15) | 0.0169(5)    |
| C19 | 0.6234(2)   | 0.20092(19) | 0.43976(18) | 0.0282(7)    |

|     | <b>x/a</b>  | <b>y/b</b>  | <b>z/c</b>  | <b>U(eq)</b> |
|-----|-------------|-------------|-------------|--------------|
| C20 | 0.6257(2)   | 0.3349(2)   | 0.4478(2)   | 0.0358(8)    |
| C21 | 0.69943(19) | 0.19431(18) | 0.50772(17) | 0.0239(6)    |
| C22 | 0.7018(2)   | 0.33379(19) | 0.5154(2)   | 0.0336(7)    |
| C23 | 0.74078(19) | 0.26194(17) | 0.54662(17) | 0.0236(6)    |
| C24 | 0.82488(19) | 0.25719(17) | 0.61745(16) | 0.0214(6)    |
| C25 | 0.8521(2)   | 0.31874(18) | 0.67234(19) | 0.0320(8)    |
| C26 | 0.88061(19) | 0.19111(16) | 0.63095(15) | 0.0201(6)    |
| C27 | 0.9319(3)   | 0.3114(2)   | 0.73626(17) | 0.0412(10)   |
| C28 | 0.9599(2)   | 0.18775(18) | 0.69533(17) | 0.0307(7)    |



**Table S59.** Bond lengths (Å) for (H-4,4'bpv)[{Ni(H-4,4'-bpv)(H<sub>2</sub>O)<sub>4</sub>}Mo<sub>5</sub>O<sub>15</sub>(1,2-O<sub>3</sub>PC<sub>8</sub>H<sub>8</sub>PO<sub>3</sub>)]·4H<sub>2</sub>O (**8**·4H<sub>2</sub>O).

|         |            |         |            |
|---------|------------|---------|------------|
| Mo1-O2  | 1.7055(16) | Mo1-O5  | 1.7140(17) |
| Mo1-O1  | 1.9253(16) | Mo1-O4  | 1.9389(16) |
| Mo1-O3  | 2.2597(16) | Mo1-O6  | 2.3325(16) |
| Mo2-O9  | 1.7005(17) | Mo2-O8  | 1.7177(16) |
| Mo2-O4  | 1.9301(16) | Mo2-O10 | 1.9408(16) |
| Mo2-O6  | 2.2223(16) | Mo2-O7  | 2.4044(16) |
| Mo3-O11 | 1.7001(16) | Mo3-O14 | 1.7356(16) |
| Mo3-O13 | 1.9155(16) | Mo3-O10 | 1.9228(16) |
| Mo3-O7  | 2.2429(16) | Mo3-O12 | 2.3501(16) |
| Mo4-O16 | 1.7021(17) | Mo4-O15 | 1.7275(17) |
| Mo4-O17 | 1.9287(16) | Mo4-O13 | 1.9405(16) |
| Mo4-O18 | 2.2016(16) | Mo4-O12 | 2.3681(16) |
| Mo5-O20 | 1.7112(16) | Mo5-O19 | 1.7301(17) |
| Mo5-O1  | 1.8977(16) | Mo5-O17 | 1.9197(16) |
| Mo5-O21 | 2.2851(16) | Mo5-O18 | 2.3930(16) |
| Ni1-O23 | 2.0374(19) | Ni1-O14 | 2.0401(16) |
| Ni1-O25 | 2.0630(19) | Ni1-O22 | 2.0831(19) |
| Ni1-N1  | 2.086(2)   | Ni1-O24 | 2.0911(18) |
| P1-O3   | 1.5103(17) | P1-O18  | 1.5473(17) |
| P1-O7   | 1.5502(16) | P1-C1   | 1.797(2)   |

|          |            |          |            |
|----------|------------|----------|------------|
| P2-O21   | 1.5226(17) | P2-O12   | 1.5400(16) |
| P2-O6    | 1.5566(16) | P2-C8    | 1.806(2)   |
| O22-H22C | 0.78(3)    | O22-H22D | 0.75(3)    |
| O23-H23C | 0.79(3)    | O23-H23D | 0.84(3)    |
| O24-H24C | 0.80(3)    | O24-H24D | 0.80(3)    |
| O25-H25C | 0.73(3)    | O25-H25D | 0.84(3)    |
| O90-H90A | 0.841(18)  | O90-H90B | 0.839(18)  |
| O91-H91A | 0.806(17)  | O91-H91B | 0.817(17)  |
| O92-H92A | 0.863(18)  | O92-H92B | 0.842(18)  |
| O93-H93A | 0.876(18)  | O93-H93B | 0.849(18)  |
| N1-C10   | 1.343(3)   | N1-C9    | 1.349(3)   |
| N2-C18   | 1.339(3)   | N2-C17   | 1.347(3)   |
| N2-H2'   | 0.884(17)  | N3-C20   | 1.335(4)   |
| N3-C19   | 1.346(4)   | N4-C27   | 1.329(5)   |
| N4-C28   | 1.331(4)   | N4-H4'   | 0.889(19)  |
| C1-C2    | 1.509(3)   | C1-P1    | 1.797(2)   |
| C1-H1A   | 0.99       | C1-H1B   | 0.99       |
| C2-C3    | 1.405(3)   | C2-C7    | 1.410(3)   |
| C3-C4    | 1.382(4)   | C3-H3    | 0.95       |
| C4-C5    | 1.393(4)   | C4-H4    | 0.95       |
| C5-C6    | 1.385(3)   | C5-H5    | 0.95       |
| C6-C7    | 1.398(3)   | C6-H6    | 0.95       |

|          |          |          |          |
|----------|----------|----------|----------|
| C7-C8    | 1.517(3) | C8-H8A   | 0.99     |
| C8-H8B   | 0.99     | C9-C11   | 1.384(3) |
| C9-H9    | 0.95     | C10-C12  | 1.393(3) |
| C10-H10  | 0.95     | C11-C13  | 1.390(3) |
| C11-H11  | 0.95     | C12-C13  | 1.398(3) |
| C12-H12  | 0.95     | C13-C14  | 1.489(3) |
| C14-C15  | 1.398(3) | C14-C16  | 1.398(4) |
| C15-C17  | 1.377(4) | C15-H15  | 0.95     |
| C16-C18  | 1.377(4) | C16-H16  | 0.95     |
| C17-H17  | 0.95     | C18-H18  | 0.95     |
| C19-C21  | 1.387(4) | C19-H19  | 0.95     |
| C20-C22  | 1.379(5) | C20-H20  | 0.95     |
| C21-C23  | 1.388(4) | C21-H21  | 0.95     |
| C22-C23  | 1.397(4) | C22-H22A | 0.95     |
| C23-C24  | 1.487(4) | C24-C26  | 1.393(4) |
| C24-C25  | 1.405(4) | C25-C27  | 1.383(5) |
| C25-H25A | 0.95     | C26-C28  | 1.377(4) |
| C26-H26  | 0.95     | C27-H27  | 0.95     |
| C28-H28  | 0.95     |          |          |

**Table S60.** Bond angles (°) for (H-4,4'-bpy)[{Ni(H-4,4'-bpy)(H<sub>2</sub>O)<sub>4</sub>}Mo<sub>5</sub>O<sub>15</sub>(1,2-O<sub>3</sub>PC<sub>8</sub>H<sub>8</sub>PO<sub>3</sub>)]·4H<sub>2</sub>O (**8**·4H<sub>2</sub>O).

|             |           |             |           |
|-------------|-----------|-------------|-----------|
| O2-Mo1-O5   | 102.77(8) | O2-Mo1-O1   | 101.16(7) |
| O5-Mo1-O1   | 99.79(7)  | O2-Mo1-O4   | 100.20(7) |
| O5-Mo1-O4   | 100.18(7) | O1-Mo1-O4   | 146.59(7) |
| O2-Mo1-O3   | 83.56(7)  | O5-Mo1-O3   | 173.27(7) |
| O1-Mo1-O3   | 81.01(6)  | O4-Mo1-O3   | 76.20(6)  |
| O2-Mo1-O6   | 167.47(7) | O5-Mo1-O6   | 86.98(7)  |
| O1-Mo1-O6   | 84.64(6)  | O4-Mo1-O6   | 69.99(6)  |
| O3-Mo1-O6   | 86.44(6)  | O9-Mo2-O8   | 104.73(8) |
| O9-Mo2-O4   | 98.39(8)  | O8-Mo2-O4   | 97.77(7)  |
| O9-Mo2-O10  | 97.97(7)  | O8-Mo2-O10  | 100.63(7) |
| O4-Mo2-O10  | 151.31(7) | O9-Mo2-O6   | 97.26(7)  |
| O8-Mo2-O6   | 157.16(7) | O4-Mo2-O6   | 72.64(6)  |
| O10-Mo2-O6  | 82.04(6)  | O9-Mo2-O7   | 164.54(7) |
| O8-Mo2-O7   | 87.42(7)  | O4-Mo2-O7   | 89.21(6)  |
| O10-Mo2-O7  | 69.94(6)  | O6-Mo2-O7   | 72.07(6)  |
| O11-Mo3-O14 | 103.16(8) | O11-Mo3-O13 | 99.44(7)  |
| O14-Mo3-O13 | 101.53(7) | O11-Mo3-O10 | 102.55(8) |
| O14-Mo3-O10 | 96.51(7)  | O13-Mo3-O10 | 147.44(7) |
| O11-Mo3-O7  | 92.13(7)  | O14-Mo3-O7  | 163.56(7) |
| O13-Mo3-O7  | 81.54(6)  | O10-Mo3-O7  | 73.98(6)  |

|             |           |             |           |
|-------------|-----------|-------------|-----------|
| O11-Mo3-O12 | 170.65(7) | O14-Mo3-O12 | 84.50(7)  |
| O13-Mo3-O12 | 73.49(6)  | O10-Mo3-O12 | 81.60(6)  |
| O7-Mo3-O12  | 80.89(6)  | O16-Mo4-O15 | 104.05(8) |
| O16-Mo4-O17 | 101.67(8) | O15-Mo4-O17 | 96.88(7)  |
| O16-Mo4-O13 | 96.46(8)  | O15-Mo4-O13 | 99.89(7)  |
| O17-Mo4-O13 | 151.47(7) | O16-Mo4-O18 | 97.23(7)  |
| O15-Mo4-O18 | 158.15(7) | O17-Mo4-O18 | 73.67(6)  |
| O13-Mo4-O18 | 82.39(6)  | O16-Mo4-O12 | 166.25(7) |
| O15-Mo4-O12 | 86.44(7)  | O17-Mo4-O12 | 85.59(6)  |
| O13-Mo4-O12 | 72.66(6)  | O18-Mo4-O12 | 73.41(6)  |
| O20-Mo5-O19 | 101.26(8) | O20-Mo5-O1  | 103.34(8) |
| O19-Mo5-O1  | 98.96(7)  | O20-Mo5-O17 | 100.93(7) |
| O19-Mo5-O17 | 101.35(7) | O1-Mo5-O17  | 144.43(7) |
| O20-Mo5-O21 | 86.78(7)  | O19-Mo5-O21 | 171.88(7) |
| O1-Mo5-O21  | 77.83(6)  | O17-Mo5-O21 | 78.00(6)  |
| O20-Mo5-O18 | 170.02(7) | O19-Mo5-O18 | 83.54(7)  |
| O1-Mo5-O18  | 84.35(6)  | O17-Mo5-O18 | 69.40(6)  |
| O21-Mo5-O18 | 88.70(5)  | O23-Ni1-O14 | 89.86(7)  |
| O23-Ni1-O25 | 175.33(8) | O14-Ni1-O25 | 92.87(7)  |
| O23-Ni1-O22 | 87.63(8)  | O14-Ni1-O22 | 90.01(7)  |
| O25-Ni1-O22 | 88.58(8)  | O23-Ni1-N1  | 96.36(8)  |
| O14-Ni1-N1  | 90.08(7)  | O25-Ni1-N1  | 87.43(8)  |

|               |            |               |            |
|---------------|------------|---------------|------------|
| O22-Ni1-N1    | 176.01(8)  | O23-Ni1-O24   | 85.64(7)   |
| O14-Ni1-O24   | 175.26(7)  | O25-Ni1-O24   | 91.52(8)   |
| O22-Ni1-O24   | 88.32(7)   | N1-Ni1-O24    | 91.90(7)   |
| O3-P1-O18     | 110.02(9)  | O3-P1-O7      | 110.86(9)  |
| O18-P1-O7     | 110.60(9)  | O3-P1-C1      | 108.25(10) |
| O18-P1-C1     | 108.67(10) | O7-P1-C1      | 108.36(10) |
| O21-P2-O12    | 112.07(9)  | O21-P2-O6     | 108.08(9)  |
| O12-P2-O6     | 110.80(9)  | O21-P2-C8     | 110.46(10) |
| O12-P2-C8     | 108.13(10) | O6-P2-C8      | 107.20(10) |
| Mo5-O1-Mo1    | 148.94(9)  | P1-O3-Mo1     | 121.91(9)  |
| Mo2-O4-Mo1    | 121.45(8)  | P2-O6-Mo2     | 130.82(9)  |
| P2-O6-Mo1     | 132.54(9)  | Mo2-O6-Mo1    | 95.60(6)   |
| P1-O7-Mo3     | 128.54(9)  | P1-O7-Mo2     | 125.49(9)  |
| Mo3-O7-Mo2    | 93.48(6)   | Mo3-O10-Mo2   | 122.43(8)  |
| P2-O12-Mo3    | 125.29(9)  | P2-O12-Mo4    | 129.23(9)  |
| Mo3-O12-Mo4   | 91.43(5)   | Mo3-O13-Mo4   | 122.32(8)  |
| Mo3-O14-Ni1   | 169.59(10) | Mo5-O17-Mo4   | 122.41(8)  |
| P1-O18-Mo4    | 130.54(9)  | P1-O18-Mo5    | 132.96(9)  |
| Mo4-O18-Mo5   | 94.36(6)   | P2-O21-Mo5    | 119.48(9)  |
| Ni1-O22-H22C  | 126.(2)    | Ni1-O22-H22D  | 117.(2)    |
| H22C-O22-H22D | 105.(3)    | Ni1-O23-H23C  | 121.(2)    |
| Ni1-O23-H23D  | 108.(2)    | H23C-O23-H23D | 107.(3)    |

|               |            |               |            |
|---------------|------------|---------------|------------|
| Ni1-O24-H24C  | 110.(2)    | Ni1-O24-H24D  | 110.(2)    |
| H24C-O24-H24D | 98.(3)     | Ni1-O25-H25C  | 119.(2)    |
| Ni1-O25-H25D  | 114.(2)    | H25C-O25-H25D | 106.(3)    |
| H90A-O90-H90B | 105.(3)    | H91A-O91-H91B | 106.(3)    |
| H92A-O92-H92B | 107.(3)    | H93A-O93-H93B | 119.(3)    |
| C10-N1-C9     | 117.5(2)   | C10-N1-Ni1    | 122.77(16) |
| C9-N1-Ni1     | 119.64(16) | C18-N2-C17    | 122.4(2)   |
| C18-N2-H2'    | 117.6(19)  | C17-N2-H2'    | 119.9(19)  |
| C20-N3-C19    | 117.1(3)   | C27-N4-C28    | 121.8(3)   |
| C27-N4-H4'    | 116.(3)    | C28-N4-H4'    | 122.(3)    |
| C2-C1-P1      | 110.24(16) | C2-C1-H1A     | 109.6      |
| P1-C1-H1A     | 109.6      | C2-C1-H1B     | 109.6      |
| P1-C1-H1B     | 109.6      | H1A-C1-H1B    | 108.1      |
| C3-C2-C7      | 118.8(2)   | C3-C2-C1      | 117.3(2)   |
| C7-C2-C1      | 123.8(2)   | C4-C3-C2      | 121.2(2)   |
| C4-C3-H3      | 119.4      | C2-C3-H3      | 119.4      |
| C3-C4-C5      | 119.9(2)   | C3-C4-H4      | 120.0      |
| C5-C4-H4      | 120.0      | C6-C5-C4      | 119.7(2)   |
| C6-C5-H5      | 120.2      | C4-C5-H5      | 120.2      |
| C5-C6-C7      | 121.3(2)   | C5-C6-H6      | 119.4      |
| C7-C6-H6      | 119.4      | C6-C7-C2      | 119.1(2)   |
| C6-C7-C8      | 118.8(2)   | C2-C7-C8      | 122.1(2)   |

|             |            |             |          |
|-------------|------------|-------------|----------|
| C7-C8-P2    | 112.93(16) | C7-C8-H8A   | 109.0    |
| P2-C8-H8A   | 109.0      | C7-C8-H8B   | 109.0    |
| P2-C8-H8B   | 109.0      | H8A-C8-H8B  | 107.8    |
| N1-C9-C11   | 122.8(2)   | N1-C9-H9    | 118.6    |
| C11-C9-H9   | 118.6      | N1-C10-C12  | 123.0(2) |
| N1-C10-H10  | 118.5      | C12-C10-H10 | 118.5    |
| C9-C11-C13  | 119.9(2)   | C9-C11-H11  | 120.0    |
| C13-C11-H11 | 120.0      | C10-C12-C13 | 119.3(2) |
| C10-C12-H12 | 120.3      | C13-C12-H12 | 120.3    |
| C11-C13-C12 | 117.4(2)   | C11-C13-C14 | 120.8(2) |
| C12-C13-C14 | 121.7(2)   | C15-C14-C16 | 118.5(2) |
| C15-C14-C13 | 121.1(2)   | C16-C14-C13 | 120.3(2) |
| C17-C15-C14 | 119.8(2)   | C17-C15-H15 | 120.1    |
| C14-C15-H15 | 120.1      | C18-C16-C14 | 119.5(2) |
| C18-C16-H16 | 120.2      | C14-C16-H16 | 120.2    |
| N2-C17-C15  | 119.6(2)   | N2-C17-H17  | 120.2    |
| C15-C17-H17 | 120.2      | N2-C18-C16  | 120.1(2) |
| N2-C18-H18  | 120.0      | C16-C18-H18 | 120.0    |
| N3-C19-C21  | 123.3(3)   | N3-C19-H19  | 118.3    |
| C21-C19-H19 | 118.3      | N3-C20-C22  | 123.4(3) |
| N3-C20-H20  | 118.3      | C22-C20-H20 | 118.3    |
| C19-C21-C23 | 119.2(3)   | C19-C21-H21 | 120.4    |



|              |          |              |          |
|--------------|----------|--------------|----------|
| C23-C21-H21  | 120.4    | C20-C22-C23  | 119.5(3) |
| C20-C22-H22A | 120.2    | C23-C22-H22A | 120.2    |
| C21-C23-C22  | 117.4(3) | C21-C23-C24  | 120.6(3) |
| C22-C23-C24  | 121.9(3) | C26-C24-C25  | 117.5(3) |
| C26-C24-C23  | 120.6(2) | C25-C24-C23  | 121.9(3) |
| C27-C25-C24  | 119.2(3) | C27-C25-H25A | 120.4    |
| C24-C25-H25A | 120.4    | C28-C26-C24  | 120.5(3) |
| C28-C26-H26  | 119.7    | C24-C26-H26  | 119.7    |
| N4-C27-C25   | 120.9(3) | N4-C27-H27   | 119.6    |
| C25-C27-H27  | 119.6    | N4-C28-C26   | 120.1(3) |
| N4-C28-H28   | 120.0    | C26-C28-H28  | 120.0    |

**Table S61.** Torsion angles (°) for (H-4,4'-bpy)[{Ni(H-4,4'-bpy)(H<sub>2</sub>O)<sub>4</sub>}Mo<sub>5</sub>O<sub>15</sub>(1,2-O<sub>3</sub>PC<sub>8</sub>H<sub>8</sub>PO<sub>3</sub>)]·4H<sub>2</sub>O (**8**·4H<sub>2</sub>O).

|                 |             |                 |             |
|-----------------|-------------|-----------------|-------------|
| O20-Mo5-O1-Mo1  | 143.47(18)  | O19-Mo5-O1-Mo1  | -112.62(18) |
| O17-Mo5-O1-Mo1  | 11.7(3)     | O21-Mo5-O1-Mo1  | 59.80(17)   |
| O18-Mo5-O1-Mo1  | -30.08(18)  | O18-P1-O3-Mo1   | 60.73(13)   |
| O7-P1-O3-Mo1    | -61.93(13)  | C1-P1-O3-Mo1    | 179.35(10)  |
| O21-P2-O6-Mo2   | -174.47(11) | O12-P2-O6-Mo2   | -51.32(14)  |
| C8-P2-O6-Mo2    | 66.46(14)   | O21-P2-O6-Mo1   | -9.11(15)   |
| O12-P2-O6-Mo1   | 114.04(12)  | C8-P2-O6-Mo1    | -128.18(12) |
| O3-P1-O7-Mo3    | 153.47(10)  | O18-P1-O7-Mo3   | 31.15(14)   |
| C1-P1-O7-Mo3    | -87.87(13)  | O3-P1-O7-Mo2    | 21.92(13)   |
| O18-P1-O7-Mo2   | -100.40(11) | C1-P1-O7-Mo2    | 140.57(11)  |
| O21-P2-O12-Mo3  | 153.87(9)   | O6-P2-O12-Mo3   | 33.06(13)   |
| C8-P2-O12-Mo3   | -84.15(12)  | O21-P2-O12-Mo4  | 25.75(14)   |
| O6-P2-O12-Mo4   | -95.06(12)  | C8-P2-O12-Mo4   | 147.73(11)  |
| O11-Mo3-O14-Ni1 | -135.8(5)   | O13-Mo3-O14-Ni1 | -33.2(6)    |
| O10-Mo3-O14-Ni1 | 119.6(5)    | O7-Mo3-O14-Ni1  | 66.1(7)     |
| O12-Mo3-O14-Ni1 | 38.7(5)     | O3-P1-O18-Mo4   | -168.74(11) |
| O7-P1-O18-Mo4   | -45.93(14)  | C1-P1-O18-Mo4   | 72.91(14)   |
| O3-P1-O18-Mo5   | -9.84(15)   | O7-P1-O18-Mo5   | 112.96(12)  |
| C1-P1-O18-Mo5   | -128.20(13) | O12-P2-O21-Mo5  | -56.92(12)  |
| O6-P2-O21-Mo5   | 65.46(11)   | C8-P2-O21-Mo5   | -177.55(10) |

|                 |             |                 |             |
|-----------------|-------------|-----------------|-------------|
| P1-C1-C2-C3     | -85.3(2)    | P1-C1-C2-C7     | 90.4(2)     |
| C7-C2-C3-C4     | -0.3(4)     | C1-C2-C3-C4     | 175.7(2)    |
| C2-C3-C4-C5     | 0.1(4)      | C3-C4-C5-C6     | 0.0(4)      |
| C4-C5-C6-C7     | 0.1(4)      | C5-C6-C7-C2     | -0.2(4)     |
| C5-C6-C7-C8     | 180.0(2)    | C3-C2-C7-C6     | 0.3(3)      |
| C1-C2-C7-C6     | -175.4(2)   | C3-C2-C7-C8     | -179.9(2)   |
| C1-C2-C7-C8     | 4.3(3)      | C6-C7-C8-P2     | -68.1(3)    |
| C2-C7-C8-P2     | 112.2(2)    | O21-P2-C8-C7    | -43.12(19)  |
| O12-P2-C8-C7    | -166.09(16) | O6-P2-C8-C7     | 74.40(18)   |
| C10-N1-C9-C11   | 1.4(4)      | Ni1-N1-C9-C11   | 177.32(18)  |
| C9-N1-C10-C12   | -1.1(4)     | Ni1-N1-C10-C12  | -176.83(19) |
| N1-C9-C11-C13   | -0.1(4)     | N1-C10-C12-C13  | -0.6(4)     |
| C9-C11-C13-C12  | -1.5(4)     | C9-C11-C13-C14  | 175.8(2)    |
| C10-C12-C13-C11 | 1.8(4)      | C10-C12-C13-C14 | -175.4(2)   |
| C11-C13-C14-C15 | 21.9(4)     | C12-C13-C14-C15 | -161.0(2)   |
| C11-C13-C14-C16 | -155.3(2)   | C12-C13-C14-C16 | 21.8(4)     |
| C16-C14-C15-C17 | 3.4(4)      | C13-C14-C15-C17 | -173.8(2)   |
| C15-C14-C16-C18 | -3.2(4)     | C13-C14-C16-C18 | 174.1(2)    |
| C18-N2-C17-C15  | -2.8(4)     | C14-C15-C17-N2  | -0.5(4)     |
| C17-N2-C18-C16  | 3.0(4)      | C14-C16-C18-N2  | 0.1(4)      |
| C20-N3-C19-C21  | -1.8(4)     | C19-N3-C20-C22  | 2.3(5)      |
| N3-C19-C21-C23  | 0.1(4)      | N3-C20-C22-C23  | -1.0(5)     |

|                 |           |                 |           |
|-----------------|-----------|-----------------|-----------|
| C19-C21-C23-C22 | 1.2(4)    | C19-C21-C23-C24 | -177.1(2) |
| C20-C22-C23-C21 | -0.8(4)   | C20-C22-C23-C24 | 177.5(3)  |
| C21-C23-C24-C26 | 21.9(4)   | C22-C23-C24-C26 | -156.4(3) |
| C21-C23-C24-C25 | -159.1(3) | C22-C23-C24-C25 | 22.7(4)   |
| C26-C24-C25-C27 | 0.3(4)    | C23-C24-C25-C27 | -178.8(3) |
| C25-C24-C26-C28 | -1.0(4)   | C23-C24-C26-C28 | 178.1(3)  |
| C28-N4-C27-C25  | -1.3(5)   | C24-C25-C27-N4  | 0.8(4)    |
| C27-N4-C28-C26  | 0.6(5)    | C24-C26-C28-N4  | 0.6(4)    |

**Table S62.** Anisotropic atomic displacement parameters ( $\text{\AA}^2$ ) for (H-4,4'bpv)[{Ni(H-4,4'-bpv)(H<sub>2</sub>O)<sub>4</sub>}Mo<sub>5</sub>O<sub>15</sub>(1,2-O<sub>3</sub>PC<sub>8</sub>H<sub>8</sub>PO<sub>3</sub>)]·4H<sub>2</sub>O (**8**·4H<sub>2</sub>O).

The anisotropic atomic displacement factor exponent takes the form:  $-2\pi^2 [ h^2 a^{*2} U_{11} + \dots + 2 h k a^* b^* U_{12} ]$

|     | U <sub>11</sub> | U <sub>22</sub> | U <sub>33</sub> | U <sub>23</sub> | U <sub>13</sub> | U <sub>12</sub> |
|-----|-----------------|-----------------|-----------------|-----------------|-----------------|-----------------|
| Mo1 | 0.01064(10)     | 0.00630(10)     | 0.00790(10)     | -0.00072(8)     | 0.00104(8)      | -0.00041(8)     |
| Mo2 | 0.00957(10)     | 0.00818(10)     | 0.00752(10)     | -0.00086(8)     | 0.00168(8)      | 0.00090(8)      |
| Mo3 | 0.01070(10)     | 0.00577(10)     | 0.00696(10)     | -0.00031(7)     | 0.00294(8)      | 0.00003(8)      |
| Mo4 | 0.00938(10)     | 0.00728(10)     | 0.01011(10)     | -0.00097(8)     | 0.00343(8)      | -0.00077(8)     |
| Mo5 | 0.00994(10)     | 0.00663(10)     | 0.00908(10)     | -0.00069(8)     | 0.00222(8)      | 0.00093(8)      |
| Ni1 | 0.01181(15)     | 0.00734(15)     | 0.00796(14)     | -0.00038(12)    | 0.00350(12)     | -0.00074(12)    |
| P1  | 0.0113(3)       | 0.0069(3)       | 0.0065(3)       | -0.0003(2)      | 0.0032(2)       | 0.0002(2)       |
| P2  | 0.0096(3)       | 0.0062(3)       | 0.0065(3)       | 0.0004(2)       | 0.0019(2)       | -0.0005(2)      |
| O1  | 0.0111(8)       | 0.0095(8)       | 0.0120(8)       | -0.0008(7)      | 0.0020(7)       | -0.0001(7)      |
| O2  | 0.0137(9)       | 0.0107(8)       | 0.0104(8)       | -0.0011(7)      | 0.0024(7)       | -0.0009(7)      |
| O3  | 0.0152(9)       | 0.0108(8)       | 0.0086(8)       | -0.0013(7)      | 0.0049(7)       | -0.0026(7)      |
| O4  | 0.0114(8)       | 0.0105(8)       | 0.0093(8)       | -0.0011(7)      | 0.0011(7)       | 0.0006(7)       |
| O5  | 0.0161(9)       | 0.0103(8)       | 0.0128(8)       | 0.0001(7)       | 0.0044(7)       | -0.0005(7)      |
| O6  | 0.0101(8)       | 0.0075(8)       | 0.0081(8)       | -0.0001(6)      | 0.0014(6)       | -0.0005(6)      |
| O7  | 0.0128(8)       | 0.0073(8)       | 0.0075(8)       | -0.0006(6)      | 0.0037(7)       | 0.0003(6)       |
| O8  | 0.0166(9)       | 0.0103(9)       | 0.0125(8)       | -0.0005(7)      | 0.0009(7)       | 0.0022(7)       |
| O9  | 0.0136(9)       | 0.0170(9)       | 0.0139(9)       | -0.0032(7)      | 0.0047(7)       | -0.0018(7)      |
| O10 | 0.0107(8)       | 0.0094(8)       | 0.0087(8)       | -0.0018(7)      | 0.0039(7)       | 0.0004(7)       |

|     | <b>U<sub>11</sub></b> | <b>U<sub>22</sub></b> | <b>U<sub>33</sub></b> | <b>U<sub>23</sub></b> | <b>U<sub>13</sub></b> | <b>U<sub>12</sub></b> |
|-----|-----------------------|-----------------------|-----------------------|-----------------------|-----------------------|-----------------------|
| O11 | 0.0180(9)             | 0.0093(8)             | 0.0127(8)             | 0.0008(7)             | 0.0054(7)             | 0.0020(7)             |
| O12 | 0.0106(8)             | 0.0075(8)             | 0.0087(8)             | 0.0001(6)             | 0.0037(6)             | 0.0000(6)             |
| O13 | 0.0144(9)             | 0.0071(8)             | 0.0104(8)             | 0.0007(7)             | 0.0060(7)             | 0.0001(7)             |
| O14 | 0.0126(8)             | 0.0084(8)             | 0.0108(8)             | -0.0017(7)            | 0.0047(7)             | -0.0003(7)            |
| O15 | 0.0122(9)             | 0.0123(9)             | 0.0144(9)             | -0.0022(7)            | 0.0013(7)             | 0.0005(7)             |
| O16 | 0.0188(9)             | 0.0135(9)             | 0.0239(10)            | -0.0010(8)            | 0.0132(8)             | -0.0013(7)            |
| O17 | 0.0101(8)             | 0.0103(8)             | 0.0097(8)             | -0.0007(7)            | 0.0012(7)             | -0.0006(7)            |
| O18 | 0.0138(8)             | 0.0074(8)             | 0.0087(8)             | -0.0002(6)            | 0.0037(7)             | 0.0007(7)             |
| O19 | 0.0151(9)             | 0.0109(9)             | 0.0153(9)             | -0.0025(7)            | 0.0060(7)             | 0.0004(7)             |
| O20 | 0.0153(9)             | 0.0092(8)             | 0.0154(9)             | 0.0009(7)             | 0.0043(7)             | 0.0023(7)             |
| O21 | 0.0122(8)             | 0.0066(8)             | 0.0100(8)             | 0.0005(6)             | 0.0036(7)             | 0.0001(6)             |
| O22 | 0.0257(11)            | 0.0104(9)             | 0.0134(9)             | -0.0019(8)            | 0.0036(8)             | 0.0002(8)             |
| O23 | 0.0170(9)             | 0.0145(10)            | 0.0158(9)             | -0.0025(8)            | 0.0070(8)             | -0.0013(8)            |
| O24 | 0.0148(9)             | 0.0110(9)             | 0.0121(9)             | 0.0027(7)             | 0.0037(7)             | -0.0009(7)            |
| O25 | 0.0187(10)            | 0.0166(10)            | 0.0170(10)            | 0.0005(8)             | 0.0095(8)             | -0.0038(8)            |
| O90 | 0.0404(13)            | 0.0221(11)            | 0.0216(11)            | -0.0038(9)            | 0.0147(10)            | -0.0150(9)            |
| O91 | 0.0244(10)            | 0.0131(9)             | 0.0165(10)            | -0.0011(8)            | 0.0100(8)             | 0.0067(8)             |
| O92 | 0.0267(11)            | 0.0353(13)            | 0.0257(11)            | 0.0062(10)            | 0.0121(9)             | 0.0027(9)             |
| O93 | 0.0356(12)            | 0.0218(11)            | 0.0426(13)            | 0.0020(10)            | 0.0245(11)            | -0.0019(10)           |
| N1  | 0.0109(10)            | 0.0107(10)            | 0.0118(10)            | 0.0005(8)             | 0.0046(8)             | -0.0004(8)            |
| N2  | 0.0213(12)            | 0.0079(10)            | 0.0225(12)            | 0.0049(9)             | 0.0114(10)            | 0.0022(9)             |

|     | <b>U<sub>11</sub></b> | <b>U<sub>22</sub></b> | <b>U<sub>33</sub></b> | <b>U<sub>23</sub></b> | <b>U<sub>13</sub></b> | <b>U<sub>12</sub></b> |
|-----|-----------------------|-----------------------|-----------------------|-----------------------|-----------------------|-----------------------|
| N3  | 0.0213(13)            | 0.0438(17)            | 0.0353(15)            | 0.0105(13)            | 0.0149(11)            | 0.0056(12)            |
| N4  | 0.075(2)              | 0.0272(15)            | 0.0125(13)            | 0.0067(11)            | -0.0012(14)           | -0.0219(16)           |
| C1  | 0.0132(12)            | 0.0085(11)            | 0.0088(11)            | 0.0007(9)             | 0.0047(9)             | -0.0001(9)            |
| C2  | 0.0123(12)            | 0.0103(12)            | 0.0098(11)            | -0.0037(9)            | 0.0066(9)             | -0.0006(9)            |
| C3  | 0.0200(13)            | 0.0121(12)            | 0.0105(12)            | 0.0010(10)            | 0.0063(10)            | -0.0004(10)           |
| C4  | 0.0241(14)            | 0.0127(13)            | 0.0159(13)            | -0.0015(10)           | 0.0112(11)            | -0.0077(11)           |
| C5  | 0.0169(13)            | 0.0161(13)            | 0.0129(12)            | -0.0045(10)           | 0.0046(10)            | -0.0068(10)           |
| C6  | 0.0168(13)            | 0.0153(13)            | 0.0102(12)            | 0.0005(10)            | 0.0047(10)            | -0.0009(10)           |
| C7  | 0.0135(12)            | 0.0109(12)            | 0.0097(11)            | -0.0021(9)            | 0.0073(10)            | -0.0013(9)            |
| C8  | 0.0122(12)            | 0.0086(11)            | 0.0082(11)            | 0.0005(9)             | 0.0029(9)             | -0.0006(9)            |
| C9  | 0.0145(12)            | 0.0127(12)            | 0.0115(12)            | -0.0016(10)           | 0.0040(10)            | -0.0019(10)           |
| C10 | 0.0125(12)            | 0.0121(12)            | 0.0140(12)            | 0.0019(10)            | 0.0016(10)            | -0.0014(10)           |
| C11 | 0.0139(12)            | 0.0126(12)            | 0.0136(12)            | 0.0027(10)            | 0.0044(10)            | 0.0015(10)            |
| C12 | 0.0141(12)            | 0.0101(12)            | 0.0168(13)            | -0.0008(10)           | 0.0015(10)            | -0.0027(10)           |
| C13 | 0.0109(12)            | 0.0122(12)            | 0.0150(12)            | 0.0026(10)            | 0.0067(10)            | -0.0001(10)           |
| C14 | 0.0143(12)            | 0.0110(12)            | 0.0145(12)            | 0.0023(10)            | 0.0066(10)            | 0.0011(10)            |
| C15 | 0.0140(13)            | 0.0125(13)            | 0.0204(13)            | 0.0020(10)            | 0.0060(10)            | 0.0001(10)            |
| C16 | 0.0148(13)            | 0.0127(12)            | 0.0184(13)            | 0.0016(10)            | 0.0049(10)            | -0.0007(10)           |
| C17 | 0.0151(13)            | 0.0175(13)            | 0.0195(13)            | 0.0034(11)            | 0.0066(11)            | 0.0034(10)            |
| C18 | 0.0186(13)            | 0.0119(13)            | 0.0219(13)            | -0.0011(11)           | 0.0090(11)            | -0.0022(10)           |
| C19 | 0.0209(15)            | 0.0339(17)            | 0.0329(17)            | -0.0009(14)           | 0.0132(13)            | -0.0035(13)           |

|     | <b>U<sub>11</sub></b> | <b>U<sub>22</sub></b> | <b>U<sub>33</sub></b> | <b>U<sub>23</sub></b> | <b>U<sub>13</sub></b> | <b>U<sub>12</sub></b> |
|-----|-----------------------|-----------------------|-----------------------|-----------------------|-----------------------|-----------------------|
| C20 | 0.0318(18)            | 0.0292(17)            | 0.052(2)              | 0.0079(16)            | 0.0220(16)            | 0.0060(14)            |
| C21 | 0.0205(14)            | 0.0268(16)            | 0.0269(15)            | 0.0007(13)            | 0.0114(12)            | -0.0009(12)           |
| C22 | 0.0274(17)            | 0.0278(17)            | 0.051(2)              | -0.0035(15)           | 0.0206(16)            | -0.0003(13)           |
| C23 | 0.0206(14)            | 0.0263(15)            | 0.0321(16)            | -0.0021(13)           | 0.0196(13)            | -0.0010(12)           |
| C24 | 0.0257(15)            | 0.0249(15)            | 0.0210(14)            | -0.0051(12)           | 0.0174(12)            | -0.0086(12)           |
| C25 | 0.050(2)              | 0.0239(16)            | 0.0372(18)            | -0.0109(14)           | 0.0349(17)            | -0.0155(14)           |
| C26 | 0.0273(15)            | 0.0226(15)            | 0.0130(13)            | -0.0024(11)           | 0.0102(11)            | -0.0089(12)           |
| C27 | 0.075(3)              | 0.041(2)              | 0.0129(15)            | -0.0137(14)           | 0.0223(16)            | -0.0357(19)           |
| C28 | 0.0447(19)            | 0.0246(16)            | 0.0189(15)            | 0.0068(12)            | 0.0060(14)            | -0.0126(14)           |



**Table S63.** Hydrogen atomic coordinates and isotropic atomic displacement parameters ( $\text{\AA}^2$ ) for (H-4,4'-bpy)[{Ni(H-4,4'-bpy)(H<sub>2</sub>O)<sub>4</sub>}Mo<sub>5</sub>O<sub>15</sub>(1,2-O<sub>3</sub>PC<sub>8</sub>H<sub>8</sub>PO<sub>3</sub>)]·4H<sub>2</sub>O (**8**·4H<sub>2</sub>O).

|      | <b>x/a</b> | <b>y/b</b> | <b>z/c</b> | <b>U(eq)</b> |
|------|------------|------------|------------|--------------|
| H22C | 0.369(2)   | 0.3391(19) | 0.2743(18) | 0.021        |
| H22D | 0.371(2)   | 0.3614(18) | 0.3390(19) | 0.021        |
| H23C | 0.471(2)   | 0.5178(18) | 0.2259(18) | 0.019        |
| H23D | 0.461(2)   | 0.4418(19) | 0.2312(17) | 0.019        |
| H24C | 0.463(2)   | 0.5182(17) | 0.3907(17) | 0.015        |
| H24D | 0.4127(19) | 0.4782(18) | 0.4117(17) | 0.015        |
| H25C | 0.210(2)   | 0.4600(18) | 0.3196(19) | 0.02         |
| H25D | 0.168(2)   | 0.4842(17) | 0.2507(18) | 0.02         |
| H90A | 0.424(2)   | 0.5546(14) | 0.9515(18) | 0.032        |
| H90B | 0.388(2)   | 0.4907(18) | 0.9711(15) | 0.032        |
| H91A | 0.0408(19) | 0.5067(13) | 0.1412(16) | 0.021        |
| H91B | 0.074(2)   | 0.4407(16) | 0.1285(14) | 0.021        |
| H92A | 0.4844(17) | 0.2482(19) | 0.3110(17) | 0.034        |
| H92B | 0.447(2)   | 0.217(2)   | 0.2371(14) | 0.034        |
| H93A | 0.546(2)   | 0.6185(12) | 0.1825(19) | 0.037        |
| H93B | 0.554(2)   | 0.5486(19) | 0.1358(17) | 0.037        |
| H2'  | 0.2129(19) | 1.0529(11) | 0.1115(16) | 0.02         |
| H4'  | 1.032(2)   | 0.245(2)   | 0.7898(16) | 0.062(13)    |
| H1A  | 0.3110     | 0.1843     | 0.3259     | 0.012        |

|      | <b>x/a</b> | <b>y/b</b> | <b>z/c</b> | <b>U(eq)</b> |
|------|------------|------------|------------|--------------|
| H1B  | 0.3109     | 0.1059     | 0.3747     | 0.012        |
| H3   | 0.1809     | 0.0209     | 0.3384     | 0.017        |
| H4   | 0.0502     | -0.0280    | 0.2433     | 0.02         |
| H5   | -0.0187    | 0.0414     | 0.1257     | 0.019        |
| H6   | 0.0440     | 0.1595     | 0.1045     | 0.017        |
| H8A  | 0.2375     | 0.2573     | 0.2399     | 0.012        |
| H8B  | 0.1397     | 0.2792     | 0.1774     | 0.012        |
| H9   | 0.2121     | 0.5900     | 0.1366     | 0.016        |
| H10  | 0.3983     | 0.6525     | 0.3382     | 0.016        |
| H11  | 0.1747     | 0.7198     | 0.1030     | 0.016        |
| H12  | 0.3648     | 0.7846     | 0.3105     | 0.018        |
| H15  | 0.1190     | 0.8365     | 0.0991     | 0.019        |
| H16  | 0.3683     | 0.8956     | 0.2539     | 0.019        |
| H17  | 0.0988     | 0.9663     | 0.0555     | 0.021        |
| H18  | 0.3427     | 1.0242     | 0.2078     | 0.02         |
| H19  | 0.5957     | 0.1542     | 0.4137     | 0.034        |
| H20  | 0.5996     | 0.3843     | 0.4279     | 0.043        |
| H21  | 0.7229     | 0.1441     | 0.5274     | 0.029        |
| H22A | 0.7274     | 0.3815     | 0.5405     | 0.04         |
| H25A | 0.8160     | 0.3648     | 0.6656     | 0.038        |
| H26  | 0.8638     | 0.1480     | 0.5955     | 0.024        |

|     | <b>x/a</b> | <b>y/b</b> | <b>z/c</b> | <b>U(eq)</b> |
|-----|------------|------------|------------|--------------|
| H27 | 0.9502     | 0.3525     | 0.7739     | 0.049        |
| H28 | 0.9978     | 0.1427     | 0.7038     | 0.037        |

**Table S64.** Sample and crystal data for  $[\{\text{Ni}(\text{tpypy})\text{z}(\text{H}_2\text{O})\}_2\text{Mo}_6\text{O}_{18}(\text{H}_2\text{O})(1,4\text{-O}_3\text{PC}_8\text{H}_8\text{PO}_3)] \cdot 6\text{H}_2\text{O}$  (**9**·6H<sub>2</sub>O).

|                        |                                                                                                                                                                                     |                            |
|------------------------|-------------------------------------------------------------------------------------------------------------------------------------------------------------------------------------|----------------------------|
| Identification code    | $[\{\text{Ni}(\text{tpypy})\text{z}(\text{H}_2\text{O})\}_2\text{Mo}_6\text{O}_{18}(\text{H}_2\text{O})(1,4\text{-O}_3\text{PC}_8\text{H}_8\text{PO}_3)] \cdot 6\text{H}_2\text{O}$ |                            |
| Chemical formula       | $\text{C}_{56}\text{H}_{58}\text{Mo}_6\text{N}_{12}\text{Ni}_2\text{O}_{33}\text{P}_2$                                                                                              |                            |
| Formula weight         | 2182.14                                                                                                                                                                             |                            |
| Temperature            | 90(2) K                                                                                                                                                                             |                            |
| Wavelength             | 0.71073 Å                                                                                                                                                                           |                            |
| Crystal size           | 0.040 x 0.060 x 0.080 mm                                                                                                                                                            |                            |
| Crystal system         | Monoclinic                                                                                                                                                                          |                            |
| Space group            | P21/n                                                                                                                                                                               |                            |
| Unit cell dimensions   | $a = 14.3824(13)$ Å                                                                                                                                                                 | $\alpha = 90^\circ$        |
|                        | $b = 23.955(2)$ Å                                                                                                                                                                   | $\beta = 100.325(2)^\circ$ |
|                        | $c = 20.6777(19)$ Å                                                                                                                                                                 | $\gamma = 90^\circ$        |
| Volume                 | $7008.7(11)$ Å <sup>3</sup>                                                                                                                                                         |                            |
| Z                      | 4                                                                                                                                                                                   |                            |
| Density (calculated)   | $2.068$ g/cm <sup>3</sup>                                                                                                                                                           |                            |
| Absorption coefficient | $1.709$ mm <sup>-1</sup>                                                                                                                                                            |                            |
| F(000)                 | 4320                                                                                                                                                                                |                            |

**Table S65.** Data collection and structure refinement for [ {Ni(tpypy<sub>z</sub>)(H<sub>2</sub>O)}<sub>2</sub>Mo<sub>6</sub>O<sub>18</sub>(H<sub>2</sub>O)(1,4-O<sub>3</sub>PC<sub>8</sub>H<sub>8</sub>PO<sub>3</sub>)·6H<sub>2</sub>O (9·6H<sub>2</sub>O).

|                                   |                                                                                                              |
|-----------------------------------|--------------------------------------------------------------------------------------------------------------|
| Theta range for data collection   | 1.31 to 26.37°                                                                                               |
| Index ranges                      | -17<=h<=17, -29<=k<=29, -25<=l<=25                                                                           |
| Reflections collected             | 78703                                                                                                        |
| Independent reflections           | 14313 [R(int) = 0.1103]                                                                                      |
| Max. and min. transmission        | 0.9350 and 0.8750                                                                                            |
| Refinement method                 | Full-matrix least-squares on F <sup>2</sup>                                                                  |
| Refinement program                | SHELXL-2013 (Sheldrick, 2013)                                                                                |
| Function minimized                | $\Sigma w(F_o^2 - F_c^2)^2$                                                                                  |
| Data / restraints / parameters    | 14313 / 379 / 1048                                                                                           |
| Goodness-of-fit on F <sup>2</sup> | 0.943                                                                                                        |
| $\Delta/\sigma_{\max}$            | 1.820                                                                                                        |
| Final R indices                   | 9651 data; I>2σ(I)      R1 = 0.0487, wR2 = 0.0981<br>all data                      R1 = 0.0909, wR2 = 0.1154 |
| Weighting scheme                  | $w=1/[\sigma^2(F_o^2)+(0.0580P)^2]$<br>where $P=(F_o^2+2F_c^2)/3$                                            |
| Largest diff. peak and hole       | 1.348 and -0.805 eÅ <sup>-3</sup>                                                                            |
| R.M.S. deviation from mean        | 0.165 eÅ <sup>-3</sup>                                                                                       |

**Table S66.** Atomic coordinates and equivalent isotropic atomic displacement parameters ( $\text{\AA}^2$ ) for  $[\{\text{Ni}(\text{tpypy})\text{z}(\text{H}_2\text{O})\}_2\text{Mo}_6\text{O}_{18}(\text{H}_2\text{O})(1,4\text{-O}_3\text{PC}_8\text{H}_8\text{PO}_3)]\cdot 6\text{H}_2\text{O}$  (**9**·6H<sub>2</sub>O).

U(eq) is defined as one third of the trace of the orthogonalized  $U_{ij}$  tensor.

|     | <b>x/a</b>  | <b>y/b</b>  | <b>z/c</b> | <b>U(eq)</b> |
|-----|-------------|-------------|------------|--------------|
| Mo1 | 0.54943(4)  | 0.74094(2)  | 0.08652(3) | 0.00833(12)  |
| Mo2 | 0.59482(4)  | 0.87294(2)  | 0.18266(3) | 0.01210(13)  |
| Mo3 | 0.43381(4)  | 0.87303(2)  | 0.27387(3) | 0.01289(13)  |
| Mo4 | 0.32262(4)  | 0.74131(2)  | 0.29955(3) | 0.00857(12)  |
| Mo5 | 0.44391(3)  | 0.62244(2)  | 0.29172(3) | 0.00856(12)  |
| Mo6 | 0.55699(3)  | 0.62080(2)  | 0.16426(3) | 0.00810(12)  |
| Ni1 | 0.74573(5)  | 0.69167(4)  | 0.01304(4) | 0.01115(18)  |
| Ni2 | 0.46615(5)  | 0.87275(3)  | 0.82840(4) | 0.00928(17)  |
| P1  | 0.35190(10) | 0.69866(7)  | 0.14372(8) | 0.0064(3)    |
| P2  | 0.05924(11) | 0.75579(7)  | 0.75943(8) | 0.0082(3)    |
| O1  | 0.8318(3)   | 0.6544(2)   | 0.9563(2)  | 0.0178(11)   |
| O2  | 0.8073(3)   | 0.64462(19) | 0.0901(2)  | 0.0127(10)   |
| O3  | 0.6654(3)   | 0.72560(18) | 0.0778(2)  | 0.0112(9)    |
| O4  | 0.4979(3)   | 0.75556(19) | 0.0081(2)  | 0.0139(10)   |
| O5  | 0.5168(3)   | 0.66213(18) | 0.0867(2)  | 0.0115(9)    |
| O6  | 0.4104(3)   | 0.74482(18) | 0.1188(2)  | 0.0098(9)    |
| O7  | 0.5699(3)   | 0.81284(18) | 0.1216(2)  | 0.0124(9)    |
| O8  | 0.7084(3)   | 0.8639(2)   | 0.2198(2)  | 0.0221(11)   |

|     | <b>x/a</b> | <b>y/b</b>  | <b>z/c</b> | <b>U(eq)</b> |
|-----|------------|-------------|------------|--------------|
| O9  | 0.5987(3)  | 0.92592(19) | 0.1290(2)  | 0.0227(11)   |
| O10 | 0.5370(3)  | 0.91151(18) | 0.2451(2)  | 0.0173(10)   |
| O11 | 0.3502(3)  | 0.92506(19) | 0.2615(2)  | 0.0207(11)   |
| O12 | 0.4095(3)  | 0.85853(19) | 0.1563(2)  | 0.0177(10)   |
| O13 | 0.4701(3)  | 0.8723(2)   | 0.3562(2)  | 0.0246(11)   |
| O14 | 0.3520(3)  | 0.81139(18) | 0.2641(2)  | 0.0128(9)    |
| O15 | 0.3709(3)  | 0.75500(18) | 0.3792(2)  | 0.0120(9)    |
| O16 | 0.2033(3)  | 0.74779(18) | 0.2978(2)  | 0.0127(10)   |
| O17 | 0.4939(3)  | 0.6156(2)   | 0.3723(2)  | 0.0165(10)   |
| O18 | 0.3313(3)  | 0.66177(18) | 0.2998(2)  | 0.0120(9)    |
| O19 | 0.3908(3)  | 0.55869(18) | 0.2714(2)  | 0.0146(10)   |
| O20 | 0.5577(3)  | 0.61451(17) | 0.2567(2)  | 0.0098(9)    |
| O21 | 0.2903(3)  | 0.72345(18) | 0.1896(2)  | 0.0102(9)    |
| O22 | 0.4108(3)  | 0.64998(18) | 0.1808(2)  | 0.0104(9)    |
| O23 | 0.5175(3)  | 0.55659(18) | 0.1356(2)  | 0.0125(9)    |
| O24 | 0.6775(3)  | 0.61823(18) | 0.1669(2)  | 0.0122(9)    |
| O25 | 0.0396(3)  | 0.69341(18) | 0.7490(2)  | 0.0113(9)    |
| O26 | 0.9771(3)  | 0.78334(17) | 0.7860(2)  | 0.0093(9)    |
| O27 | 0.0790(3)  | 0.78348(17) | 0.6961(2)  | 0.0079(9)    |
| O90 | 0.2445(6)  | 0.0065(4)   | 0.1622(5)  | 0.099(3)     |
| O91 | 0.2678(5)  | 0.4083(3)   | 0.1414(4)  | 0.071(3)     |

|     | <b>x/a</b> | <b>y/b</b> | <b>z/c</b> | <b>U(eq)</b> |
|-----|------------|------------|------------|--------------|
| O92 | 0.3413(4)  | 0.5117(2)  | 0.1456(3)  | 0.0305(13)   |
| O93 | 0.0999(5)  | 0.7383(3)  | 0.1576(3)  | 0.0538(18)   |
| O94 | 0.1586(5)  | 0.8476(3)  | 0.1958(4)  | 0.070(2)     |
| O95 | 0.2422(5)  | 0.9027(3)  | 0.1063(3)  | 0.0536(19)   |
| N1  | 0.6364(4)  | 0.6402(2)  | 0.9700(3)  | 0.0124(11)   |
| N2  | 0.6727(3)  | 0.7423(2)  | 0.9452(2)  | 0.0074(10)   |
| N3  | 0.8316(3)  | 0.7621(2)  | 0.0236(2)  | 0.0106(11)   |
| N4  | 0.5586(3)  | 0.9240(2)  | 0.8913(3)  | 0.0115(11)   |
| N5  | 0.5571(3)  | 0.8162(2)  | 0.8764(2)  | 0.0076(10)   |
| N6  | 0.4144(3)  | 0.7962(2)  | 0.7841(3)  | 0.0098(11)   |
| N7  | 0.5328(3)  | 0.8945(2)  | 0.7501(3)  | 0.0115(11)   |
| N8  | 0.3748(3)  | 0.9282(2)  | 0.7805(3)  | 0.0096(11)   |
| N9  | 0.3656(3)  | 0.8785(2)  | 0.8891(2)  | 0.0114(11)   |
| N10 | 0.3484(4)  | 0.9672(2)  | 0.5775(3)  | 0.0153(12)   |
| N11 | 0.2507(3)  | 0.0027(2)  | 0.7134(2)  | 0.0111(11)   |
| N12 | 0.1778(4)  | 0.0236(2)  | 0.8641(3)  | 0.0160(12)   |
| C1  | 0.6246(5)  | 0.5878(3)  | 0.9860(3)  | 0.0177(14)   |
| C2  | 0.5479(4)  | 0.5556(3)  | 0.9573(3)  | 0.0163(14)   |
| C3  | 0.4774(5)  | 0.5809(3)  | 0.9127(3)  | 0.0159(14)   |
| C4  | 0.4889(4)  | 0.6359(3)  | 0.8957(3)  | 0.0133(13)   |
| C5  | 0.5705(4)  | 0.6646(3)  | 0.9226(3)  | 0.0095(12)   |



|     | <b>x/a</b> | <b>y/b</b> | <b>z/c</b> | <b>U(eq)</b> |
|-----|------------|------------|------------|--------------|
| C6  | 0.5927(4)  | 0.7232(3)  | 0.9079(3)  | 0.0084(12)   |
| C7  | 0.5426(4)  | 0.7620(3)  | 0.8636(3)  | 0.0074(12)   |
| C8  | 0.6970(4)  | 0.7961(3)  | 0.9499(3)  | 0.0101(12)   |
| C9  | 0.6287(4)  | 0.8358(3)  | 0.9220(3)  | 0.0091(12)   |
| C10 | 0.7954(4)  | 0.8046(3)  | 0.9847(3)  | 0.0110(13)   |
| C11 | 0.9219(4)  | 0.7643(3)  | 0.0525(3)  | 0.0143(14)   |
| C12 | 0.9803(5)  | 0.8088(3)  | 0.0442(3)  | 0.0194(15)   |
| C13 | 0.9443(4)  | 0.8514(3)  | 0.0032(3)  | 0.0158(14)   |
| C14 | 0.8498(4)  | 0.8501(3)  | 0.9726(3)  | 0.0129(13)   |
| C15 | 0.6228(4)  | 0.8956(3)  | 0.9366(3)  | 0.0119(13)   |
| C16 | 0.6686(4)  | 0.9212(3)  | 0.9927(3)  | 0.0115(13)   |
| C17 | 0.6560(4)  | 0.9783(3)  | 0.0013(3)  | 0.0166(14)   |
| C18 | 0.5963(4)  | 0.0075(3)  | 0.9537(3)  | 0.0172(14)   |
| C19 | 0.5475(4)  | 0.9783(3)  | 0.8997(3)  | 0.0154(14)   |
| C20 | 0.4709(4)  | 0.7521(3)  | 0.8027(3)  | 0.0083(12)   |
| C21 | 0.4668(4)  | 0.7036(3)  | 0.7658(3)  | 0.0116(13)   |
| C22 | 0.3963(4)  | 0.6986(3)  | 0.7112(3)  | 0.0140(14)   |
| C23 | 0.3349(4)  | 0.7430(3)  | 0.6948(3)  | 0.0129(14)   |
| C24 | 0.3469(4)  | 0.7907(3)  | 0.7312(3)  | 0.0127(13)   |
| C25 | 0.6212(4)  | 0.8808(3)  | 0.7450(3)  | 0.0134(14)   |
| C26 | 0.6718(4)  | 0.9089(3)  | 0.7053(3)  | 0.0164(15)   |

|     | <b>x/a</b> | <b>y/b</b> | <b>z/c</b> | <b>U(eq)</b> |
|-----|------------|------------|------------|--------------|
| C27 | 0.6312(4)  | 0.9544(3)  | 0.6701(3)  | 0.0155(14)   |
| C28 | 0.5373(4)  | 0.9690(3)  | 0.6737(3)  | 0.0135(14)   |
| C29 | 0.4902(4)  | 0.9375(3)  | 0.7139(3)  | 0.0108(13)   |
| C30 | 0.3940(4)  | 0.9509(3)  | 0.7256(3)  | 0.0117(13)   |
| C31 | 0.3250(4)  | 0.9853(3)  | 0.6880(3)  | 0.0119(13)   |
| C32 | 0.2965(4)  | 0.9411(3)  | 0.8052(3)  | 0.0097(12)   |
| C33 | 0.2382(4)  | 0.9838(3)  | 0.7726(3)  | 0.0109(13)   |
| C34 | 0.3667(4)  | 0.8492(3)  | 0.9439(3)  | 0.0141(14)   |
| C35 | 0.2912(5)  | 0.8466(3)  | 0.9763(3)  | 0.0173(15)   |
| C36 | 0.2099(4)  | 0.8746(3)  | 0.9489(3)  | 0.0185(15)   |
| C37 | 0.2073(4)  | 0.9053(3)  | 0.8925(3)  | 0.0135(14)   |
| C38 | 0.2870(4)  | 0.9086(3)  | 0.8637(3)  | 0.0106(13)   |
| C39 | 0.3341(4)  | 0.0057(3)  | 0.6219(3)  | 0.0123(13)   |
| C40 | 0.3372(5)  | 0.0623(3)  | 0.6113(3)  | 0.0187(15)   |
| C41 | 0.3629(5)  | 0.0811(3)  | 0.5532(4)  | 0.0278(17)   |
| C42 | 0.3793(5)  | 0.0420(3)  | 0.5074(4)  | 0.0272(17)   |
| C43 | 0.3683(5)  | 0.9860(3)  | 0.5201(3)  | 0.0227(16)   |
| C44 | 0.1610(4)  | 0.0125(3)  | 0.7989(3)  | 0.0112(13)   |
| C45 | 0.0782(4)  | 0.0272(3)  | 0.7583(3)  | 0.0116(13)   |
| C46 | 0.1092(4)  | 0.0485(3)  | 0.8884(3)  | 0.0194(15)   |
| C47 | 0.0241(5)  | 0.0646(3)  | 0.8509(4)  | 0.0207(16)   |

|     | <b>x/a</b> | <b>y/b</b> | <b>z/c</b> | <b>U(eq)</b> |
|-----|------------|------------|------------|--------------|
| C48 | 0.0076(5)  | 0.0531(3)  | 0.7842(3)  | 0.0174(15)   |
| C49 | 0.2738(4)  | 0.6654(3)  | 0.0763(3)  | 0.0129(13)   |
| C50 | 0.2450(4)  | 0.6957(3)  | 0.0122(3)  | 0.0133(13)   |
| C51 | 0.3034(4)  | 0.6920(3)  | 0.9653(3)  | 0.0127(13)   |
| C52 | 0.1569(4)  | 0.7210(3)  | 0.9934(3)  | 0.0143(14)   |
| C53 | 0.2749(4)  | 0.7144(3)  | 0.9030(3)  | 0.0149(14)   |
| C54 | 0.1271(5)  | 0.7437(3)  | 0.9308(3)  | 0.0169(15)   |
| C55 | 0.1858(4)  | 0.7399(3)  | 0.8845(3)  | 0.0138(14)   |
| C56 | 0.1668(4)  | 0.7663(3)  | 0.8171(3)  | 0.0106(13)   |

**Table S67.** Bond lengths (Å) for [ $\{\text{Ni}(\text{tpypyzy})(\text{H}_2\text{O})\}_2\text{Mo}_6\text{O}_{18}(\text{H}_2\text{O})(1,4\text{-O}_3\text{PC}_8\text{H}_8\text{PO}_3)\cdot 6\text{H}_2\text{O}$  ( $9\cdot 6\text{H}_2\text{O}$ ).

|         |          |         |          |
|---------|----------|---------|----------|
| Mo1-O4  | 1.695(4) | Mo1-O3  | 1.748(4) |
| Mo1-O7  | 1.872(4) | Mo1-O5  | 1.946(4) |
| Mo1-O6  | 2.221(4) | Mo1-O27 | 2.305(4) |
| Mo2-O8  | 1.690(5) | Mo2-O9  | 1.693(5) |
| Mo2-O10 | 1.897(4) | Mo2-O7  | 1.906(4) |
| Mo2-O25 | 2.330(4) | Mo3-O13 | 1.688(5) |
| Mo3-O11 | 1.719(5) | Mo3-O14 | 1.876(4) |
| Mo3-O10 | 1.930(4) | Mo3-O25 | 2.323(4) |
| Mo3-O12 | 2.417(4) | Mo4-O15 | 1.701(4) |
| Mo4-O16 | 1.717(4) | Mo4-O14 | 1.910(4) |
| Mo4-O18 | 1.910(4) | Mo4-O21 | 2.277(4) |
| Mo4-O26 | 2.364(4) | Mo5-O17 | 1.700(4) |
| Mo5-O19 | 1.725(4) | Mo5-O18 | 1.906(4) |
| Mo5-O20 | 1.915(4) | Mo5-O26 | 2.315(4) |
| Mo5-O22 | 2.352(4) | Mo6-O23 | 1.709(4) |
| Mo6-O24 | 1.725(4) | Mo6-O5  | 1.884(4) |
| Mo6-O20 | 1.915(4) | Mo6-O22 | 2.298(4) |
| Mo6-O27 | 2.391(4) | Ni1-N2  | 2.003(5) |
| Ni1-O2  | 2.022(5) | Ni1-O1  | 2.055(4) |
| Ni1-N1  | 2.070(5) | Ni1-N3  | 2.080(5) |

|          |          |          |          |
|----------|----------|----------|----------|
| Ni1-O3   | 2.085(4) | Ni2-N8   | 2.001(5) |
| Ni2-N5   | 2.017(5) | Ni2-N9   | 2.083(5) |
| Ni2-N4   | 2.085(5) | Ni2-N7   | 2.090(5) |
| Ni2-N6   | 2.124(5) | P1-O21   | 1.530(4) |
| P1-O6    | 1.533(4) | P1-O22   | 1.560(4) |
| P1-C49   | 1.810(6) | P2-O25   | 1.529(5) |
| P2-O26   | 1.538(4) | P2-O27   | 1.539(4) |
| P2-C56   | 1.793(6) | O1-H1C   | 0.84(2)  |
| O1-H1D   | 0.85(2)  | O2-H2C   | 0.85(2)  |
| O2-H2D   | 0.84(2)  | O25-Mo3  | 2.323(4) |
| O25-Mo2  | 2.330(4) | O26-Mo5  | 2.314(4) |
| O26-Mo4  | 2.364(4) | O27-Mo1  | 2.305(4) |
| O27-Mo6  | 2.391(4) | O90-H90A | 0.93(4)  |
| O90-H90B | 0.85(2)  | O91-H91B | 0.84(2)  |
| O91-H91A | 0.84(2)  | O92-H92A | 0.82(2)  |
| O92-H92B | 0.84(2)  | O93-H93A | 0.86(2)  |
| O93-H93B | 0.89(2)  | O94-H94A | 0.88(2)  |
| O94-H94B | 0.85(2)  | O95-H95A | 0.86(2)  |
| O95-H95B | 0.84(2)  | N1-C1    | 1.317(8) |
| N1-C5    | 1.366(8) | N2-C8    | 1.333(8) |
| N2-C6    | 1.345(8) | N3-C11   | 1.329(8) |
| N3-C10   | 1.343(8) | N4-C19   | 1.327(8) |

|         |           |         |          |
|---------|-----------|---------|----------|
| N4-C15  | 1.371(8)  | N5-C7   | 1.333(8) |
| N5-C9   | 1.350(8)  | N6-C24  | 1.333(8) |
| N6-C20  | 1.348(8)  | N7-C25  | 1.336(7) |
| N7-C29  | 1.354(8)  | N8-C30  | 1.331(8) |
| N8-C32  | 1.354(7)  | N9-C34  | 1.330(8) |
| N9-C38  | 1.365(8)  | N10-C39 | 1.343(8) |
| N10-C43 | 1.348(8)  | N11-C31 | 1.339(7) |
| N11-C33 | 1.348(8)  | N12-C46 | 1.328(8) |
| N12-C44 | 1.351(8)  | C1-C2   | 1.389(9) |
| C1-H1   | 0.95      | C2-C3   | 1.383(9) |
| C2-H2   | 0.95      | C3-C4   | 1.382(9) |
| C3-H3   | 0.95      | C4-C5   | 1.387(9) |
| C4-H4   | 0.95      | C5-C6   | 1.485(8) |
| C6-C7   | 1.409(9)  | C7-C20  | 1.496(9) |
| C8-C9   | 1.415(9)  | C8-C10  | 1.483(8) |
| C9-C15  | 1.468(9)  | C10-C14 | 1.391(9) |
| C11-C12 | 1.387(9)  | C11-H11 | 0.95     |
| C12-C13 | 1.369(10) | C12-H12 | 0.95     |
| C13-C14 | 1.392(9)  | C13-H13 | 0.95     |
| C14-H14 | 0.95      | C15-C16 | 1.372(9) |
| C16-C17 | 1.396(9)  | C16-H16 | 0.95     |
| C17-C18 | 1.377(10) | C17-H17 | 0.95     |

|         |           |         |          |
|---------|-----------|---------|----------|
| C18-C19 | 1.395(9)  | C18-H18 | 0.95     |
| C19-H19 | 0.95      | C20-C21 | 1.385(9) |
| C21-C22 | 1.381(9)  | C21-H21 | 0.95     |
| C22-C23 | 1.384(9)  | C22-H22 | 0.95     |
| C23-C24 | 1.363(9)  | C23-H23 | 0.95     |
| C24-H24 | 0.95      | C25-C26 | 1.367(8) |
| C25-H25 | 0.95      | C26-C27 | 1.382(9) |
| C26-H26 | 0.95      | C27-C28 | 1.410(8) |
| C27-H27 | 0.95      | C28-C29 | 1.386(8) |
| C28-H28 | 0.95      | C29-C30 | 1.481(8) |
| C30-C31 | 1.411(9)  | C31-C39 | 1.480(8) |
| C32-C33 | 1.415(9)  | C32-C38 | 1.465(9) |
| C33-C44 | 1.490(8)  | C34-C35 | 1.374(8) |
| C34-H34 | 0.95      | C35-C36 | 1.378(9) |
| C35-H35 | 0.95      | C36-C37 | 1.374(9) |
| C36-H36 | 0.95      | C37-C38 | 1.385(8) |
| C37-H37 | 0.95      | C39-C40 | 1.374(9) |
| C40-C41 | 1.395(9)  | C40-H40 | 0.95     |
| C41-C42 | 1.381(11) | C41-H41 | 0.95     |
| C42-C43 | 1.381(11) | C42-H42 | 0.95     |
| C43-H43 | 0.95      | C44-C45 | 1.374(9) |
| C45-C48 | 1.379(8)  | C45-H45 | 0.95     |

|          |           |          |          |
|----------|-----------|----------|----------|
| C46-C47  | 1.381(9)  | C46-H46  | 0.95     |
| C47-C48  | 1.385(10) | C47-H47  | 0.95     |
| C48-H48  | 0.95      | C49-C50  | 1.503(9) |
| C49-H49A | 0.99      | C49-H49B | 0.99     |
| C50-C52  | 1.395(9)  | C50-C51  | 1.395(8) |
| C51-C53  | 1.387(9)  | C51-H51  | 0.95     |
| C52-C54  | 1.398(9)  | C52-H52  | 0.95     |
| C53-C55  | 1.409(9)  | C53-H53  | 0.95     |
| C54-C55  | 1.390(8)  | C54-H54  | 0.95     |
| C55-C56  | 1.509(9)  | C56-H56A | 0.99     |
| C56-H56B | 0.99      |          |          |



**Table S68.** Bond angles (°) for [ $\{\text{Ni}(\text{tpypy})_2(\text{H}_2\text{O})\}_2\text{Mo}_6\text{O}_{18}(\text{H}_2\text{O})(1,4\text{-O}_3\text{PC}_8\text{H}_8\text{PO}_3)\cdot 6\text{H}_2\text{O}$  ( $9\cdot 6\text{H}_2\text{O}$ ).

|             |            |             |            |
|-------------|------------|-------------|------------|
| O4-Mo1-O3   | 101.93(19) | O4-Mo1-O7   | 101.1(2)   |
| O3-Mo1-O7   | 98.45(19)  | O4-Mo1-O5   | 98.0(2)    |
| O3-Mo1-O5   | 91.80(18)  | O7-Mo1-O5   | 155.95(17) |
| O4-Mo1-O6   | 90.95(17)  | O3-Mo1-O6   | 165.17(18) |
| O7-Mo1-O6   | 86.10(16)  | O5-Mo1-O6   | 79.00(16)  |
| O4-Mo1-O27  | 164.90(17) | O3-Mo1-O27  | 92.08(17)  |
| O7-Mo1-O27  | 82.18(16)  | O5-Mo1-O27  | 75.73(16)  |
| O6-Mo1-O27  | 74.48(14)  | O8-Mo2-O9   | 104.6(2)   |
| O8-Mo2-O10  | 105.0(2)   | O9-Mo2-O10  | 98.7(2)    |
| O8-Mo2-O7   | 104.8(2)   | O9-Mo2-O7   | 99.0(2)    |
| O10-Mo2-O7  | 139.94(18) | O8-Mo2-O25  | 92.75(19)  |
| O9-Mo2-O25  | 162.1(2)   | O10-Mo2-O25 | 72.19(17)  |
| O7-Mo2-O25  | 80.27(16)  | O13-Mo3-O11 | 103.8(2)   |
| O13-Mo3-O14 | 100.1(2)   | O11-Mo3-O14 | 98.4(2)    |
| O13-Mo3-O10 | 101.5(2)   | O11-Mo3-O10 | 99.5(2)    |
| O14-Mo3-O10 | 147.65(18) | O13-Mo3-O25 | 96.9(2)    |
| O11-Mo3-O25 | 158.89(19) | O14-Mo3-O25 | 81.94(16)  |
| O10-Mo3-O25 | 71.84(16)  | O13-Mo3-O12 | 167.1(2)   |
| O11-Mo3-O12 | 89.07(19)  | O14-Mo3-O12 | 78.65(17)  |
| O10-Mo3-O12 | 74.91(18)  | O25-Mo3-O12 | 70.23(15)  |

|             |            |             |            |
|-------------|------------|-------------|------------|
| O15-Mo4-O16 | 103.6(2)   | O15-Mo4-O14 | 97.1(2)    |
| O16-Mo4-O14 | 101.64(19) | O15-Mo4-O18 | 100.1(2)   |
| O16-Mo4-O18 | 98.92(19)  | O14-Mo4-O18 | 149.24(17) |
| O15-Mo4-O21 | 167.88(17) | O16-Mo4-O21 | 88.38(17)  |
| O14-Mo4-O21 | 78.54(17)  | O18-Mo4-O21 | 79.44(17)  |
| O15-Mo4-O26 | 86.22(17)  | O16-Mo4-O26 | 167.77(18) |
| O14-Mo4-O26 | 84.06(15)  | O18-Mo4-O26 | 71.85(15)  |
| O21-Mo4-O26 | 82.12(14)  | O17-Mo5-O19 | 104.1(2)   |
| O17-Mo5-O18 | 100.29(19) | O19-Mo5-O18 | 96.49(19)  |
| O17-Mo5-O20 | 96.97(19)  | O19-Mo5-O20 | 101.02(18) |
| O18-Mo5-O20 | 151.57(18) | O17-Mo5-O26 | 95.15(19)  |
| O19-Mo5-O26 | 159.57(19) | O18-Mo5-O26 | 73.07(16)  |
| O20-Mo5-O26 | 83.06(16)  | O17-Mo5-O22 | 163.54(19) |
| O19-Mo5-O22 | 90.42(18)  | O18-Mo5-O22 | 85.43(16)  |
| O20-Mo5-O22 | 72.30(16)  | O26-Mo5-O22 | 71.59(15)  |
| O23-Mo6-O24 | 104.4(2)   | O23-Mo6-O5  | 98.4(2)    |
| O24-Mo6-O5  | 101.49(18) | O23-Mo6-O20 | 102.57(19) |
| O24-Mo6-O20 | 98.03(18)  | O5-Mo6-O20  | 146.72(17) |
| O23-Mo6-O22 | 94.00(17)  | O24-Mo6-O22 | 161.18(18) |
| O5-Mo6-O22  | 79.47(16)  | O20-Mo6-O22 | 73.57(16)  |
| O23-Mo6-O27 | 168.04(17) | O24-Mo6-O27 | 86.72(17)  |
| O5-Mo6-O27  | 74.68(17)  | O20-Mo6-O27 | 79.84(16)  |

|             |            |            |            |
|-------------|------------|------------|------------|
| O22-Mo6-O27 | 75.33(14)  | N2-Ni1-O2  | 171.85(18) |
| N2-Ni1-O1   | 99.00(19)  | O2-Ni1-O1  | 89.13(18)  |
| N2-Ni1-N1   | 78.3(2)    | O2-Ni1-N1  | 101.5(2)   |
| O1-Ni1-N1   | 89.1(2)    | N2-Ni1-N3  | 79.0(2)    |
| O2-Ni1-N3   | 101.6(2)   | O1-Ni1-N3  | 90.30(19)  |
| N1-Ni1-N3   | 156.9(2)   | N2-Ni1-O3  | 86.16(18)  |
| O2-Ni1-O3   | 85.71(17)  | O1-Ni1-O3  | 174.81(19) |
| N1-Ni1-O3   | 92.48(18)  | N3-Ni1-O3  | 90.18(18)  |
| N8-Ni2-N5   | 179.3(2)   | N8-Ni2-N9  | 77.9(2)    |
| N5-Ni2-N9   | 101.91(19) | N8-Ni2-N4  | 101.9(2)   |
| N5-Ni2-N4   | 78.7(2)    | N9-Ni2-N4  | 91.11(19)  |
| N8-Ni2-N7   | 78.6(2)    | N5-Ni2-N7  | 101.65(19) |
| N9-Ni2-N7   | 156.2(2)   | N4-Ni2-N7  | 90.4(2)    |
| N8-Ni2-N6   | 102.2(2)   | N5-Ni2-N6  | 77.2(2)    |
| N9-Ni2-N6   | 95.10(19)  | N4-Ni2-N6  | 155.8(2)   |
| N7-Ni2-N6   | 93.19(19)  | O21-P1-O6  | 110.0(2)   |
| O21-P1-O22  | 108.0(2)   | O6-P1-O22  | 114.9(2)   |
| O21-P1-C49  | 107.5(3)   | O6-P1-C49  | 111.1(3)   |
| O22-P1-C49  | 104.9(3)   | O25-P2-O26 | 109.6(2)   |
| O25-P2-O27  | 111.0(2)   | O26-P2-O27 | 112.9(2)   |
| O25-P2-C56  | 110.2(3)   | O26-P2-C56 | 109.2(3)   |
| O27-P2-C56  | 103.7(3)   | Ni1-O1-H1C | 114.(5)    |

|               |           |               |           |
|---------------|-----------|---------------|-----------|
| Ni1-O1-H1D    | 115.(5)   | H1C-O1-H1D    | 109.(4)   |
| Ni1-O2-H2C    | 119.(5)   | Ni1-O2-H2D    | 110.(4)   |
| H2C-O2-H2D    | 101.(4)   | Mo1-O3-Ni1    | 142.8(2)  |
| Mo6-O5-Mo1    | 118.3(2)  | P1-O6-Mo1     | 130.4(2)  |
| Mo1-O7-Mo2    | 161.8(2)  | Mo2-O10-Mo3   | 115.6(2)  |
| Mo3-O14-Mo4   | 145.9(3)  | Mo5-O18-Mo4   | 123.3(2)  |
| Mo5-O20-Mo6   | 121.2(2)  | P1-O21-Mo4    | 130.9(2)  |
| P1-O22-Mo6    | 125.8(2)  | P1-O22-Mo5    | 133.3(2)  |
| Mo6-O22-Mo5   | 91.67(15) | P2-O25-Mo3    | 138.6(2)  |
| P2-O25-Mo2    | 132.5(2)  | Mo3-O25-Mo2   | 88.21(15) |
| P2-O26-Mo5    | 128.0(2)  | P2-O26-Mo4    | 137.2(2)  |
| Mo5-O26-Mo4   | 91.76(14) | P2-O27-Mo1    | 134.2(2)  |
| P2-O27-Mo6    | 127.8(2)  | Mo1-O27-Mo6   | 88.89(14) |
| H90A-O90-H90B | 103.(5)   | H91B-O91-H91A | 107.(5)   |
| H92A-O92-H92B | 113.(5)   | H93A-O93-H93B | 102.(4)   |
| H94A-O94-H94B | 103.(5)   | H95A-O95-H95B | 107.(5)   |
| C1-N1-C5      | 118.9(6)  | C1-N1-Ni1     | 125.6(5)  |
| C5-N1-Ni1     | 115.5(4)  | C8-N2-C6      | 123.7(5)  |
| C8-N2-Ni1     | 115.8(4)  | C6-N2-Ni1     | 118.9(4)  |
| C11-N3-C10    | 118.8(6)  | C11-N3-Ni1    | 126.4(5)  |
| C10-N3-Ni1    | 113.1(4)  | C19-N4-C15    | 118.7(6)  |
| C19-N4-Ni2    | 125.5(4)  | C15-N4-Ni2    | 114.2(4)  |

|             |          |             |          |
|-------------|----------|-------------|----------|
| C7-N5-C9    | 123.5(5) | C7-N5-Ni2   | 119.4(4) |
| C9-N5-Ni2   | 117.1(4) | C24-N6-C20  | 118.1(6) |
| C24-N6-Ni2  | 125.9(4) | C20-N6-Ni2  | 114.0(4) |
| C25-N7-C29  | 119.2(5) | C25-N7-Ni2  | 125.1(4) |
| C29-N7-Ni2  | 113.2(4) | C30-N8-C32  | 122.8(5) |
| C30-N8-Ni2  | 118.4(4) | C32-N8-Ni2  | 118.8(4) |
| C34-N9-C38  | 119.3(5) | C34-N9-Ni2  | 125.1(4) |
| C38-N9-Ni2  | 114.8(4) | C39-N10-C43 | 117.1(6) |
| C31-N11-C33 | 119.8(5) | C46-N12-C44 | 117.0(6) |
| N1-C1-C2    | 123.4(7) | N1-C1-H1    | 118.3    |
| C2-C1-H1    | 118.3    | C3-C2-C1    | 118.3(7) |
| C3-C2-H2    | 120.9    | C1-C2-H2    | 120.9    |
| C4-C3-C2    | 118.7(6) | C4-C3-H3    | 120.7    |
| C2-C3-H3    | 120.7    | C3-C4-C5    | 120.1(6) |
| C3-C4-H4    | 119.9    | C5-C4-H4    | 119.9    |
| N1-C5-C4    | 120.3(6) | N1-C5-C6    | 113.8(5) |
| C4-C5-C6    | 125.8(6) | N2-C6-C7    | 115.8(6) |
| N2-C6-C5    | 113.4(5) | C7-C6-C5    | 130.8(6) |
| N5-C7-C6    | 117.9(6) | N5-C7-C20   | 112.5(5) |
| C6-C7-C20   | 129.5(6) | N2-C8-C9    | 117.9(6) |
| N2-C8-C10   | 112.5(5) | C9-C8-C10   | 129.6(6) |
| N5-C9-C8    | 115.8(6) | N5-C9-C15   | 114.8(5) |

|             |          |             |          |
|-------------|----------|-------------|----------|
| C8-C9-C15   | 129.4(6) | N3-C10-C14  | 122.1(6) |
| N3-C10-C8   | 114.8(5) | C14-C10-C8  | 122.7(6) |
| N3-C11-C12  | 122.7(7) | N3-C11-H11  | 118.7    |
| C12-C11-H11 | 118.7    | C13-C12-C11 | 118.6(6) |
| C13-C12-H12 | 120.7    | C11-C12-H12 | 120.7    |
| C12-C13-C14 | 119.6(6) | C12-C13-H13 | 120.2    |
| C14-C13-H13 | 120.2    | C10-C14-C13 | 118.1(6) |
| C10-C14-H14 | 121.0    | C13-C14-H14 | 121.0    |
| N4-C15-C16  | 121.2(6) | N4-C15-C9   | 113.6(6) |
| C16-C15-C9  | 124.9(6) | C15-C16-C17 | 119.4(6) |
| C15-C16-H16 | 120.3    | C17-C16-H16 | 120.3    |
| C18-C17-C16 | 119.1(6) | C18-C17-H17 | 120.5    |
| C16-C17-H17 | 120.5    | C17-C18-C19 | 118.5(6) |
| C17-C18-H18 | 120.7    | C19-C18-H18 | 120.7    |
| N4-C19-C18  | 122.8(6) | N4-C19-H19  | 118.6    |
| C18-C19-H19 | 118.6    | N6-C20-C21  | 122.4(6) |
| N6-C20-C7   | 113.9(5) | C21-C20-C7  | 123.5(6) |
| C22-C21-C20 | 118.4(6) | C22-C21-H21 | 120.8    |
| C20-C21-H21 | 120.8    | C21-C22-C23 | 118.5(6) |
| C21-C22-H22 | 120.7    | C23-C22-H22 | 120.7    |
| C24-C23-C22 | 119.8(6) | C24-C23-H23 | 120.1    |
| C22-C23-H23 | 120.1    | N6-C24-C23  | 122.5(6) |

|             |          |             |          |
|-------------|----------|-------------|----------|
| N6-C24-H24  | 118.8    | C23-C24-H24 | 118.8    |
| N7-C25-C26  | 122.8(6) | N7-C25-H25  | 118.6    |
| C26-C25-H25 | 118.6    | C25-C26-C27 | 119.1(6) |
| C25-C26-H26 | 120.5    | C27-C26-H26 | 120.5    |
| C26-C27-C28 | 119.1(6) | C26-C27-H27 | 120.5    |
| C28-C27-H27 | 120.5    | C29-C28-C27 | 118.2(6) |
| C29-C28-H28 | 120.9    | C27-C28-H28 | 120.9    |
| N7-C29-C28  | 121.6(5) | N7-C29-C30  | 114.7(5) |
| C28-C29-C30 | 123.5(6) | N8-C30-C31  | 118.4(5) |
| N8-C30-C29  | 113.2(5) | C31-C30-C29 | 128.4(6) |
| N11-C31-C30 | 119.9(5) | N11-C31-C39 | 117.9(6) |
| C30-C31-C39 | 122.2(5) | N8-C32-C33  | 116.6(5) |
| N8-C32-C38  | 113.4(5) | C33-C32-C38 | 130.0(5) |
| N11-C33-C32 | 120.8(5) | N11-C33-C44 | 114.0(5) |
| C32-C33-C44 | 125.2(5) | N9-C34-C35  | 123.3(6) |
| N9-C34-H34  | 118.4    | C35-C34-H34 | 118.4    |
| C34-C35-C36 | 117.7(6) | C34-C35-H35 | 121.2    |
| C36-C35-H35 | 121.2    | C37-C36-C35 | 120.1(6) |
| C37-C36-H36 | 120.0    | C35-C36-H36 | 120.0    |
| C36-C37-C38 | 119.8(6) | C36-C37-H37 | 120.1    |
| C38-C37-H37 | 120.1    | N9-C38-C37  | 119.7(6) |
| N9-C38-C32  | 114.0(5) | C37-C38-C32 | 126.3(6) |

|             |          |               |          |
|-------------|----------|---------------|----------|
| N10-C39-C40 | 123.7(6) | N10-C39-C31   | 117.0(6) |
| C40-C39-C31 | 118.9(6) | C39-C40-C41   | 118.5(7) |
| C39-C40-H40 | 120.8    | C41-C40-H40   | 120.8    |
| C42-C41-C40 | 118.4(7) | C42-C41-H41   | 120.8    |
| C40-C41-H41 | 120.8    | C43-C42-C41   | 119.2(7) |
| C43-C42-H42 | 120.4    | C41-C42-H42   | 120.4    |
| N10-C43-C42 | 122.8(7) | N10-C43-H43   | 118.6    |
| C42-C43-H43 | 118.6    | N12-C44-C45   | 122.8(6) |
| N12-C44-C33 | 116.3(5) | C45-C44-C33   | 121.0(6) |
| C44-C45-C48 | 119.7(6) | C44-C45-H45   | 120.2    |
| C48-C45-H45 | 120.2    | N12-C46-C47   | 123.8(7) |
| N12-C46-H46 | 118.1    | C47-C46-H46   | 118.1    |
| C46-C47-C48 | 118.8(6) | C46-C47-H47   | 120.6    |
| C48-C47-H47 | 120.6    | C45-C48-C47   | 118.0(6) |
| C45-C48-H48 | 121.0    | C47-C48-H48   | 121.0    |
| C50-C49-P1  | 120.2(5) | C50-C49-H49A  | 107.3    |
| P1-C49-H49A | 107.3    | C50-C49-H49B  | 107.3    |
| P1-C49-H49B | 107.3    | H49A-C49-H49B | 106.9    |
| C52-C50-C51 | 117.7(6) | C52-C50-C49   | 123.2(6) |
| C51-C50-C49 | 118.5(6) | C53-C51-C50   | 120.4(6) |
| C53-C51-H51 | 119.8    | C50-C51-H51   | 119.8    |
| C50-C52-C54 | 122.6(6) | C50-C52-H52   | 118.7    |



|             |          |               |          |
|-------------|----------|---------------|----------|
| C54-C52-H52 | 118.7    | C51-C53-C55   | 121.6(6) |
| C51-C53-H53 | 119.2    | C55-C53-H53   | 119.2    |
| C55-C54-C52 | 119.3(6) | C55-C54-H54   | 120.3    |
| C52-C54-H54 | 120.3    | C54-C55-C53   | 118.4(6) |
| C54-C55-C56 | 125.2(6) | C53-C55-C56   | 116.0(5) |
| C55-C56-P2  | 123.2(4) | C55-C56-H56A  | 106.5    |
| P2-C56-H56A | 106.5    | C55-C56-H56B  | 106.5    |
| P2-C56-H56B | 106.5    | H56A-C56-H56B | 106.5    |

**Table S69.** Anisotropic atomic displacement parameters ( $\text{\AA}^2$ ) for  
 $[\{\text{Ni}(\text{tpypy})\text{z}(\text{H}_2\text{O})\}_2\text{Mo}_6\text{O}_{18}(\text{H}_2\text{O})(1,4\text{-O}_3\text{PC}_8\text{H}_8\text{PO}_3)]\cdot 6\text{H}_2\text{O}$  (**9**·6H<sub>2</sub>O).

The anisotropic atomic displacement factor exponent takes the form:  $-2\pi^2 [ h^2 a^{*2} U_{11} + \dots + 2 h k a^* b^* U_{12} ]$

|     | $U_{11}$  | $U_{22}$  | $U_{33}$  | $U_{23}$   | $U_{13}$   | $U_{12}$    |
|-----|-----------|-----------|-----------|------------|------------|-------------|
| Mo1 | 0.0087(3) | 0.0097(3) | 0.0067(3) | 0.0012(2)  | 0.0020(2)  | 0.0018(2)   |
| Mo2 | 0.0141(3) | 0.0082(3) | 0.0149(3) | -0.0001(2) | 0.0051(2)  | 0.0010(2)   |
| Mo3 | 0.0133(3) | 0.0112(3) | 0.0153(3) | -0.0034(3) | 0.0059(2)  | -0.0010(2)  |
| Mo4 | 0.0092(3) | 0.0100(3) | 0.0070(3) | -0.0008(2) | 0.0027(2)  | -0.0003(2)  |
| Mo5 | 0.0083(2) | 0.0099(3) | 0.0074(3) | 0.0002(2)  | 0.0012(2)  | 0.0000(2)   |
| Mo6 | 0.0088(2) | 0.0085(3) | 0.0070(3) | 0.0002(2)  | 0.0015(2)  | 0.0008(2)   |
| Ni1 | 0.0107(4) | 0.0129(5) | 0.0099(4) | 0.0014(4)  | 0.0018(3)  | 0.0029(3)   |
| Ni2 | 0.0093(4) | 0.0093(4) | 0.0090(4) | 0.0017(4)  | 0.0010(3)  | 0.0021(3)   |
| P1  | 0.0043(7) | 0.0077(8) | 0.0062(8) | -0.0003(7) | -0.0013(6) | 0.0005(6)   |
| P2  | 0.0080(7) | 0.0086(9) | 0.0079(8) | 0.0004(7)  | 0.0013(6)  | 0.0002(6)   |
| O1  | 0.023(3)  | 0.020(3)  | 0.014(3)  | -0.002(2)  | 0.011(2)   | 0.002(2)    |
| O2  | 0.013(2)  | 0.014(2)  | 0.012(2)  | 0.0026(19) | 0.0035(18) | 0.0033(18)  |
| O3  | 0.012(2)  | 0.014(2)  | 0.008(2)  | 0.0002(18) | 0.0024(17) | 0.0003(17)  |
| O4  | 0.012(2)  | 0.019(3)  | 0.012(2)  | 0.0045(19) | 0.0034(18) | 0.0049(19)  |
| O5  | 0.016(2)  | 0.013(2)  | 0.005(2)  | 0.0007(18) | 0.0018(18) | 0.0024(18)  |
| O6  | 0.010(2)  | 0.014(2)  | 0.005(2)  | 0.0021(18) | 0.0003(17) | 0.0025(17)  |
| O7  | 0.020(2)  | 0.011(2)  | 0.008(2)  | 0.0022(18) | 0.0048(18) | -0.0002(18) |
| O8  | 0.016(2)  | 0.022(3)  | 0.029(3)  | -0.004(2)  | 0.006(2)   | 0.000(2)    |

|     | <b>U<sub>11</sub></b> | <b>U<sub>22</sub></b> | <b>U<sub>33</sub></b> | <b>U<sub>23</sub></b> | <b>U<sub>13</sub></b> | <b>U<sub>12</sub></b> |
|-----|-----------------------|-----------------------|-----------------------|-----------------------|-----------------------|-----------------------|
| O9  | 0.038(3)              | 0.010(3)              | 0.025(3)              | 0.004(2)              | 0.016(2)              | 0.002(2)              |
| O10 | 0.019(2)              | 0.009(2)              | 0.026(3)              | -0.005(2)             | 0.009(2)              | -0.0023(18)           |
| O11 | 0.022(2)              | 0.012(3)              | 0.031(3)              | -0.004(2)             | 0.013(2)              | 0.002(2)              |
| O12 | 0.029(3)              | 0.015(3)              | 0.012(2)              | -0.0002(19)           | 0.010(2)              | 0.002(2)              |
| O13 | 0.019(2)              | 0.035(3)              | 0.019(3)              | -0.006(2)             | 0.001(2)              | -0.003(2)             |
| O14 | 0.011(2)              | 0.012(2)              | 0.018(2)              | 0.0031(19)            | 0.0083(18)            | 0.0024(17)            |
| O15 | 0.015(2)              | 0.013(2)              | 0.008(2)              | 0.0014(18)            | 0.0044(18)            | -0.0021(18)           |
| O16 | 0.012(2)              | 0.014(3)              | 0.014(2)              | -0.0029(19)           | 0.0053(18)            | 0.0003(18)            |
| O17 | 0.013(2)              | 0.028(3)              | 0.007(2)              | 0.002(2)              | 0.0011(17)            | 0.004(2)              |
| O18 | 0.010(2)              | 0.013(2)              | 0.013(2)              | 0.0016(19)            | 0.0016(18)            | 0.0000(17)            |
| O19 | 0.015(2)              | 0.013(2)              | 0.017(3)              | -0.003(2)             | 0.0081(19)            | -0.0017(18)           |
| O20 | 0.011(2)              | 0.011(2)              | 0.007(2)              | -0.0013(18)           | 0.0011(17)            | 0.0002(17)            |
| O21 | 0.013(2)              | 0.015(2)              | 0.003(2)              | 0.0012(18)            | 0.0006(17)            | 0.0049(18)            |
| O22 | 0.011(2)              | 0.013(2)              | 0.007(2)              | 0.0018(18)            | 0.0012(17)            | 0.0009(17)            |
| O23 | 0.012(2)              | 0.014(2)              | 0.012(2)              | 0.0008(19)            | 0.0011(18)            | 0.0030(18)            |
| O24 | 0.013(2)              | 0.012(3)              | 0.011(2)              | 0.0019(19)            | 0.0003(17)            | 0.0028(18)            |
| O25 | 0.013(2)              | 0.010(2)              | 0.011(2)              | 0.0014(19)            | 0.0047(18)            | 0.0041(18)            |
| O26 | 0.010(2)              | 0.008(2)              | 0.011(2)              | 0.0018(18)            | 0.0023(17)            | -0.0007(17)           |
| O27 | 0.009(2)              | 0.009(2)              | 0.005(2)              | 0.0032(18)            | 0.0003(16)            | 0.0027(17)            |
| O90 | 0.088(6)              | 0.084(7)              | 0.142(8)              | -0.050(7)             | 0.070(6)              | 0.001(6)              |
| O91 | 0.103(6)              | 0.071(6)              | 0.060(5)              | -0.045(4)             | 0.068(5)              | -0.057(5)             |

|     | <b>U<sub>11</sub></b> | <b>U<sub>22</sub></b> | <b>U<sub>33</sub></b> | <b>U<sub>23</sub></b> | <b>U<sub>13</sub></b> | <b>U<sub>12</sub></b> |
|-----|-----------------------|-----------------------|-----------------------|-----------------------|-----------------------|-----------------------|
| O92 | 0.025(3)              | 0.040(4)              | 0.027(3)              | -0.014(3)             | 0.005(3)              | -0.006(3)             |
| O93 | 0.045(4)              | 0.068(5)              | 0.048(4)              | 0.010(4)              | 0.008(3)              | 0.009(4)              |
| O94 | 0.041(4)              | 0.077(6)              | 0.087(7)              | 0.022(5)              | -0.005(4)             | 0.010(4)              |
| O95 | 0.075(5)              | 0.055(5)              | 0.030(4)              | -0.004(4)             | 0.009(3)              | 0.032(4)              |
| N1  | 0.014(2)              | 0.011(3)              | 0.013(3)              | 0.000(2)              | 0.006(2)              | 0.001(2)              |
| N2  | 0.005(2)              | 0.012(3)              | 0.005(3)              | -0.002(2)             | -0.0006(18)           | 0.0029(19)            |
| N3  | 0.008(2)              | 0.016(3)              | 0.007(3)              | -0.003(2)             | 0.000(2)              | 0.001(2)              |
| N4  | 0.013(2)              | 0.011(3)              | 0.012(3)              | 0.001(2)              | 0.005(2)              | 0.001(2)              |
| N5  | 0.009(2)              | 0.012(3)              | 0.003(3)              | 0.000(2)              | 0.0041(19)            | 0.0000(19)            |
| N6  | 0.004(2)              | 0.013(3)              | 0.013(3)              | 0.003(2)              | 0.0042(19)            | 0.0044(19)            |
| N7  | 0.012(2)              | 0.010(3)              | 0.012(3)              | -0.001(2)             | 0.001(2)              | 0.001(2)              |
| N8  | 0.007(2)              | 0.009(3)              | 0.012(3)              | -0.004(2)             | -0.0010(19)           | -0.001(2)             |
| N9  | 0.014(2)              | 0.012(3)              | 0.008(3)              | -0.005(2)             | 0.002(2)              | 0.000(2)              |
| N10 | 0.018(3)              | 0.016(3)              | 0.012(3)              | -0.001(2)             | 0.003(2)              | -0.005(2)             |
| N11 | 0.011(2)              | 0.011(3)              | 0.008(3)              | -0.004(2)             | -0.006(2)             | -0.002(2)             |
| N12 | 0.020(3)              | 0.013(3)              | 0.016(3)              | -0.004(2)             | 0.004(2)              | -0.003(2)             |
| C1  | 0.022(3)              | 0.014(3)              | 0.018(4)              | 0.004(3)              | 0.007(3)              | 0.005(3)              |
| C2  | 0.021(3)              | 0.013(4)              | 0.017(4)              | 0.000(3)              | 0.010(3)              | 0.002(3)              |
| C3  | 0.020(3)              | 0.018(4)              | 0.010(4)              | -0.001(3)             | 0.005(3)              | -0.006(3)             |
| C4  | 0.019(3)              | 0.016(3)              | 0.006(3)              | -0.003(3)             | 0.004(2)              | 0.000(3)              |
| C5  | 0.017(3)              | 0.007(3)              | 0.005(3)              | -0.003(2)             | 0.002(2)              | 0.000(2)              |

|     | <b>U<sub>11</sub></b> | <b>U<sub>22</sub></b> | <b>U<sub>33</sub></b> | <b>U<sub>23</sub></b> | <b>U<sub>13</sub></b> | <b>U<sub>12</sub></b> |
|-----|-----------------------|-----------------------|-----------------------|-----------------------|-----------------------|-----------------------|
| C6  | 0.014(3)              | 0.011(3)              | 0.001(3)              | 0.000(2)              | 0.002(2)              | 0.000(2)              |
| C7  | 0.008(3)              | 0.007(3)              | 0.009(3)              | 0.000(2)              | 0.008(2)              | -0.002(2)             |
| C8  | 0.014(3)              | 0.014(3)              | 0.004(3)              | -0.003(2)             | 0.005(2)              | 0.002(2)              |
| C9  | 0.008(3)              | 0.014(3)              | 0.007(3)              | 0.002(2)              | 0.004(2)              | 0.002(2)              |
| C10 | 0.009(3)              | 0.012(3)              | 0.011(3)              | -0.004(3)             | 0.001(2)              | -0.002(2)             |
| C11 | 0.011(3)              | 0.021(4)              | 0.011(4)              | -0.004(3)             | 0.002(2)              | 0.000(3)              |
| C12 | 0.014(3)              | 0.032(4)              | 0.011(4)              | -0.012(3)             | -0.001(3)             | -0.001(3)             |
| C13 | 0.012(3)              | 0.018(4)              | 0.019(4)              | -0.013(3)             | 0.007(3)              | -0.003(3)             |
| C14 | 0.014(3)              | 0.018(4)              | 0.007(3)              | -0.005(3)             | 0.003(2)              | 0.002(3)              |
| C15 | 0.008(3)              | 0.010(3)              | 0.019(4)              | 0.000(3)              | 0.005(2)              | -0.003(2)             |
| C16 | 0.008(3)              | 0.019(3)              | 0.007(3)              | 0.000(3)              | -0.001(2)             | 0.003(3)              |
| C17 | 0.020(3)              | 0.018(4)              | 0.013(4)              | -0.008(3)             | 0.005(3)              | -0.004(3)             |
| C18 | 0.023(4)              | 0.011(4)              | 0.018(4)              | -0.004(3)             | 0.005(3)              | 0.000(3)              |
| C19 | 0.013(3)              | 0.014(3)              | 0.019(4)              | 0.000(3)              | 0.002(3)              | 0.004(3)              |
| C20 | 0.008(3)              | 0.012(3)              | 0.006(3)              | -0.001(2)             | 0.002(2)              | 0.001(2)              |
| C21 | 0.014(3)              | 0.008(3)              | 0.014(3)              | 0.001(3)              | 0.004(2)              | 0.004(2)              |
| C22 | 0.022(3)              | 0.016(4)              | 0.005(3)              | -0.004(3)             | 0.004(3)              | -0.001(3)             |
| C23 | 0.005(3)              | 0.019(4)              | 0.012(4)              | -0.001(3)             | -0.002(2)             | -0.001(2)             |
| C24 | 0.010(3)              | 0.016(3)              | 0.012(3)              | 0.005(3)              | 0.002(2)              | 0.003(3)              |
| C25 | 0.015(3)              | 0.016(4)              | 0.009(3)              | -0.003(3)             | 0.002(3)              | 0.003(3)              |
| C26 | 0.012(3)              | 0.025(4)              | 0.012(4)              | -0.002(3)             | 0.002(3)              | 0.004(3)              |

|     | <b>U<sub>11</sub></b> | <b>U<sub>22</sub></b> | <b>U<sub>33</sub></b> | <b>U<sub>23</sub></b> | <b>U<sub>13</sub></b> | <b>U<sub>12</sub></b> |
|-----|-----------------------|-----------------------|-----------------------|-----------------------|-----------------------|-----------------------|
| C27 | 0.015(3)              | 0.022(4)              | 0.011(4)              | -0.003(3)             | 0.004(3)              | -0.005(3)             |
| C28 | 0.012(3)              | 0.022(4)              | 0.006(3)              | -0.002(3)             | 0.000(2)              | 0.002(3)              |
| C29 | 0.010(3)              | 0.011(3)              | 0.010(3)              | -0.005(3)             | -0.001(2)             | -0.002(2)             |
| C30 | 0.013(3)              | 0.011(3)              | 0.011(3)              | 0.002(3)              | 0.003(2)              | 0.004(2)              |
| C31 | 0.017(3)              | 0.009(3)              | 0.009(3)              | -0.003(3)             | 0.000(2)              | -0.004(3)             |
| C32 | 0.009(3)              | 0.007(3)              | 0.011(3)              | -0.004(2)             | -0.003(2)             | -0.005(2)             |
| C33 | 0.012(3)              | 0.009(3)              | 0.012(3)              | -0.002(3)             | 0.001(2)              | 0.000(2)              |
| C34 | 0.015(3)              | 0.014(4)              | 0.011(3)              | 0.002(3)              | 0.000(3)              | 0.005(3)              |
| C35 | 0.022(3)              | 0.020(4)              | 0.010(4)              | 0.004(3)              | 0.002(3)              | 0.000(3)              |
| C36 | 0.013(3)              | 0.023(4)              | 0.021(4)              | -0.004(3)             | 0.008(3)              | -0.002(3)             |
| C37 | 0.013(3)              | 0.014(4)              | 0.014(4)              | -0.003(3)             | 0.003(3)              | -0.001(3)             |
| C38 | 0.013(3)              | 0.011(3)              | 0.007(3)              | -0.004(2)             | -0.001(2)             | -0.001(2)             |
| C39 | 0.010(3)              | 0.019(4)              | 0.006(3)              | 0.002(3)              | -0.004(2)             | 0.001(3)              |
| C40 | 0.022(3)              | 0.012(3)              | 0.023(4)              | 0.004(3)              | 0.004(3)              | 0.001(3)              |
| C41 | 0.031(4)              | 0.028(4)              | 0.021(4)              | 0.011(3)              | -0.003(3)             | -0.003(3)             |
| C42 | 0.029(4)              | 0.033(4)              | 0.019(4)              | 0.008(3)              | 0.001(3)              | -0.007(3)             |
| C43 | 0.024(4)              | 0.034(4)              | 0.010(4)              | -0.004(3)             | 0.003(3)              | -0.011(3)             |
| C44 | 0.012(3)              | 0.006(3)              | 0.016(3)              | 0.002(3)              | 0.003(2)              | 0.000(2)              |
| C45 | 0.015(3)              | 0.003(3)              | 0.015(3)              | 0.005(3)              | -0.003(2)             | 0.000(2)              |
| C46 | 0.019(3)              | 0.021(4)              | 0.017(4)              | -0.008(3)             | -0.001(3)             | 0.008(3)              |
| C47 | 0.017(3)              | 0.016(4)              | 0.030(4)              | -0.006(3)             | 0.008(3)              | 0.002(3)              |

|     | <b>U<sub>11</sub></b> | <b>U<sub>22</sub></b> | <b>U<sub>33</sub></b> | <b>U<sub>23</sub></b> | <b>U<sub>13</sub></b> | <b>U<sub>12</sub></b> |
|-----|-----------------------|-----------------------|-----------------------|-----------------------|-----------------------|-----------------------|
| C48 | 0.015(3)              | 0.010(4)              | 0.025(4)              | -0.003(3)             | -0.001(3)             | -0.002(3)             |
| C49 | 0.015(3)              | 0.013(4)              | 0.010(3)              | -0.003(3)             | -0.002(2)             | -0.002(3)             |
| C50 | 0.013(3)              | 0.011(3)              | 0.014(3)              | -0.005(3)             | -0.002(2)             | -0.003(3)             |
| C51 | 0.008(3)              | 0.013(4)              | 0.016(3)              | -0.001(3)             | -0.002(2)             | 0.003(3)              |
| C52 | 0.014(3)              | 0.018(4)              | 0.013(3)              | -0.004(3)             | 0.009(3)              | 0.004(3)              |
| C53 | 0.014(3)              | 0.018(4)              | 0.012(3)              | 0.003(3)              | 0.000(3)              | 0.005(3)              |
| C54 | 0.016(3)              | 0.017(4)              | 0.018(4)              | -0.001(3)             | 0.002(3)              | 0.001(3)              |
| C55 | 0.013(3)              | 0.015(4)              | 0.013(3)              | -0.006(3)             | 0.002(2)              | -0.002(3)             |
| C56 | 0.008(3)              | 0.010(3)              | 0.013(3)              | -0.002(3)             | -0.001(2)             | -0.001(2)             |

**Table S70.** Hydrogen atomic coordinates and isotropic atomic displacement parameters ( $\text{\AA}^2$ ) for  $[\{\text{Ni}(\text{tpypy})\text{z}(\text{H}_2\text{O})\}_2\text{Mo}_6\text{O}_{18}(\text{H}_2\text{O})(1,4\text{-O}_3\text{PC}_8\text{H}_8\text{PO}_3)]\cdot 6\text{H}_2\text{O}$  (**9**·6H<sub>2</sub>O).

|      | <b>x/a</b> | <b>y/b</b> | <b>z/c</b> | <b>U(eq)</b> |
|------|------------|------------|------------|--------------|
| H1C  | 0.805(4)   | 0.630(2)   | 0.930(3)   | 0.021        |
| H1D  | 0.862(4)   | 0.677(2)   | 0.936(3)   | 0.021        |
| H2C  | 0.827(4)   | 0.6123(13) | 1.083(3)   | 0.015        |
| H2D  | 0.768(4)   | 0.637(2)   | 1.115(3)   | 0.015        |
| H90A | 0.210(7)   | 0.021(6)   | 0.124(3)   | 0.118        |
| H90B | 0.203(6)   | 0.004(6)   | 0.187(4)   | 0.118        |
| H91B | 0.253(7)   | 0.405(5)   | 0.179(2)   | 0.086        |
| H91A | 0.225(6)   | 0.428(5)   | 0.119(4)   | 0.086        |
| H92A | 0.320(5)   | 0.533(3)   | 0.115(2)   | 0.037        |
| H92B | 0.346(5)   | 0.527(3)   | 0.1824(17) | 0.037        |
| H93A | 0.086(7)   | 0.733(4)   | 0.196(2)   | 0.065        |
| H93B | 0.130(7)   | 0.771(2)   | 0.163(4)   | 0.065        |
| H94A | 0.151(7)   | 0.816(3)   | 0.174(5)   | 0.084        |
| H94B | 0.211(4)   | 0.844(4)   | 0.222(4)   | 0.084        |
| H95A | 0.204(6)   | 0.883(3)   | 1.125(5)   | 0.064        |
| H95B | 0.237(7)   | 0.9360(13) | 1.118(5)   | 0.064        |
| H1   | 0.6710     | 0.5712     | 1.0188     | 0.021        |
| H2   | 0.5440     | 0.5172     | 0.9682     | 0.02         |
| H3   | 0.4221     | 0.5607     | 0.8939     | 0.019        |



|     | <b>x/a</b> | <b>y/b</b> | <b>z/c</b> | <b>U(eq)</b> |
|-----|------------|------------|------------|--------------|
| H4  | 0.4407     | 0.6542     | 0.8657     | 0.016        |
| H11 | 0.9473     | 0.7342     | 1.0800     | 0.017        |
| H12 | 1.0441     | 0.8097     | 1.0665     | 0.023        |
| H13 | 0.9835     | 0.8818     | 0.9956     | 0.019        |
| H14 | 0.8232     | 0.8795     | 0.9444     | 0.015        |
| H16 | 0.7086     | 0.9002     | 1.0255     | 0.014        |
| H17 | 0.6882     | 0.9967     | 1.0395     | 0.02         |
| H18 | 0.5885     | 1.0467     | 0.9575     | 0.021        |
| H19 | 0.5045     | 0.9982     | 0.8676     | 0.018        |
| H21 | 0.5115     | 0.6745     | 0.7777     | 0.014        |
| H22 | 0.3900     | 0.6655     | 0.6855     | 0.017        |
| H23 | 0.2845     | 0.7401     | 0.6583     | 0.015        |
| H24 | 0.3056     | 0.8213     | 0.7183     | 0.015        |
| H25 | 0.6502     | 0.8501     | 0.7701     | 0.016        |
| H26 | 0.7339     | 0.8972     | 0.7020     | 0.02         |
| H27 | 0.6661     | 0.9756     | 0.6439     | 0.019        |
| H28 | 0.5072     | 0.9996     | 0.6493     | 0.016        |
| H34 | 0.4223     | 0.8290     | 0.9616     | 0.017        |
| H35 | 0.2950     | 0.8263     | 1.0161     | 0.021        |
| H36 | 0.1557     | 0.8726     | 0.9691     | 0.022        |
| H37 | 0.1510     | 0.9241     | 0.8732     | 0.016        |

|      | <b>x/a</b> | <b>y/b</b> | <b>z/c</b> | <b>U(eq)</b> |
|------|------------|------------|------------|--------------|
| H40  | 0.3221     | 1.0879     | 0.6429     | 0.022        |
| H41  | 0.3689     | 1.1199     | 0.5452     | 0.033        |
| H42  | 0.3980     | 1.0535     | 0.4677     | 0.033        |
| H43  | 0.3751     | 0.9597     | 0.4869     | 0.027        |
| H45  | 0.0697     | 1.0194     | 0.7125     | 0.014        |
| H46  | 0.1191     | 1.0556     | 0.9343     | 0.023        |
| H47  | -0.0221    | 1.0833     | 0.8704     | 0.025        |
| H48  | -0.0507    | 1.0628     | 0.7571     | 0.021        |
| H49A | 0.3040     | 0.6300     | 1.0667     | 0.015        |
| H49B | 0.2151     | 0.6554     | 1.0924     | 0.015        |
| H51  | 0.3631     | 0.6741     | 0.9761     | 0.015        |
| H52  | 0.1155     | 0.7228     | 1.0244     | 0.017        |
| H53  | 0.3165     | 0.7125     | 0.8722     | 0.018        |
| H54  | 0.0674     | 0.7615     | 0.9201     | 0.02         |
| H56A | 0.2189     | 0.7545     | 0.7947     | 0.013        |
| H56B | 0.1736     | 0.8071     | 0.8240     | 0.013        |

**Table S71.** Sample and crystal data for  $[\{\text{Ni}_2(\text{tpypy})_2(\text{H}_2\text{O})_4\}\text{Mo}_4\text{O}_{10}(\text{1,4-O}_3\text{PC}_8\text{H}_8\text{PO}_3)_2]\cdot 4\text{H}_2\text{O}$  (**10·4H<sub>2</sub>O**).

|                        |                                                                                                                                                              |                            |
|------------------------|--------------------------------------------------------------------------------------------------------------------------------------------------------------|----------------------------|
| Identification code    | $[\{\text{Ni}_2(\text{tpypy})_2(\text{H}_2\text{O})_4\}\text{Mo}_4\text{O}_{10}(\text{1,4-O}_3\text{PC}_8\text{H}_8\text{PO}_3)_2]\cdot 4\text{H}_2\text{O}$ |                            |
| Chemical formula       | $\text{C}_{20}\text{H}_{24}\text{Mo}_2\text{N}_3\text{NiO}_{15}\text{P}_2$                                                                                   |                            |
| Formula weight         | 858.95                                                                                                                                                       |                            |
| Temperature            | 90(2) K                                                                                                                                                      |                            |
| Wavelength             | 0.71073 Å                                                                                                                                                    |                            |
| Crystal size           | 0.125 x 0.183 x 0.192 mm                                                                                                                                     |                            |
| Crystal system         | Monoclinic                                                                                                                                                   |                            |
| Space group            | C2/c                                                                                                                                                         |                            |
| Unit cell dimensions   | $a = 24.135(4)$ Å                                                                                                                                            | $\alpha = 90^\circ$        |
|                        | $b = 11.8418(18)$ Å                                                                                                                                          | $\beta = 112.140(4)^\circ$ |
|                        | $c = 20.308(3)$ Å                                                                                                                                            | $\gamma = 90^\circ$        |
| Volume                 | $5376.1(14)$ Å <sup>3</sup>                                                                                                                                  |                            |
| Z                      | 8                                                                                                                                                            |                            |
| Density (calculated)   | $2.122$ g/cm <sup>3</sup>                                                                                                                                    |                            |
| Absorption coefficient | $1.813$ mm <sup>-1</sup>                                                                                                                                     |                            |
| F(000)                 | 3416                                                                                                                                                         |                            |

**Table S72.** Data collection and structure refinement for [ $\{\text{Ni}_2(\text{tpypy})_2(\text{H}_2\text{O})_4\}\text{Mo}_4\text{O}_{10}(1,4\text{-O}_3\text{PC}_8\text{H}_8\text{PO}_3)_2\} \cdot 4\text{H}_2\text{O}$  (**10**·4H<sub>2</sub>O).

|                                     |                                                                                                                |
|-------------------------------------|----------------------------------------------------------------------------------------------------------------|
| Theta range for data collection     | 1.82 to 26.36°                                                                                                 |
| Index ranges                        | -30 ≤ h ≤ 29, -13 ≤ k ≤ 14, -25 ≤ l ≤ 25                                                                       |
| Reflections collected               | 20391                                                                                                          |
| Independent reflections             | 5490 [R(int) = 0.1092]                                                                                         |
| Coverage of independent reflections | 100.0%                                                                                                         |
| Max. and min. transmission          | 0.8050 and 0.7220                                                                                              |
| Refinement method                   | Full-matrix least-squares on F <sup>2</sup>                                                                    |
| Refinement program                  | SHELXL-2013 (Sheldrick, 2013)                                                                                  |
| Function minimized                  | $\Sigma w(F_o^2 - F_c^2)^2$                                                                                    |
| Data / restraints / parameters      | 5490 / 127 / 416                                                                                               |
| Goodness-of-fit on F <sup>2</sup>   | 1.023                                                                                                          |
| $\Delta/\sigma_{\text{max}}$        | 0.001                                                                                                          |
| Final R indices                     | 4573 data; I > 2σ(I)      R1 = 0.0428, wR2 = 0.1143<br>all data                      R1 = 0.0508, wR2 = 0.1189 |
| Weighting scheme                    | $w=1/[\sigma^2(F_o^2)+(0.0766P)^2]$<br>where $P=(F_o^2+2F_c^2)/3$                                              |
| Largest diff. peak and hole         | 2.114 and -1.279 eÅ <sup>-3</sup>                                                                              |
| R.M.S. deviation from mean          | 0.187 eÅ <sup>-3</sup>                                                                                         |

**Table S73.** Atomic coordinates and equivalent isotropic atomic displacement parameters ( $\text{\AA}^2$ ) for  $[\{\text{Ni}_2(\text{tpypy})_2(\text{H}_2\text{O})_4\}\text{Mo}_4\text{O}_{10}(1,4\text{-O}_3\text{PC}_8\text{H}_8\text{PO}_3)_2]\cdot 4\text{H}_2\text{O}$  (**10**·4H<sub>2</sub>O).

U(eq) is defined as one third of the trace of the orthogonalized  $U_{ij}$  tensor.

|     | x/a         | y/b        | z/c         | U(eq)       |
|-----|-------------|------------|-------------|-------------|
| Mo1 | 0.29382(2)  | 0.30454(3) | 0.65747(2)  | 0.01032(12) |
| Mo2 | 0.34786(2)  | 0.09466(3) | 0.58809(2)  | 0.00955(12) |
| Ni1 | 0.41055(2)  | 0.98536(4) | 0.34326(3)  | 0.01109(15) |
| P1  | 0.31253(5)  | 0.00557(9) | 0.42012(5)  | 0.0099(2)   |
| P2  | 0.30859(4)  | 0.34317(9) | 0.50230(5)  | 0.0093(2)   |
| O1  | 0.26518(13) | 0.2121(3)  | 0.70207(15) | 0.0140(6)   |
| O2  | 0.33311(13) | 0.3993(3)  | 0.71987(16) | 0.0167(6)   |
| O3  | 0.35815(12) | 0.2127(2)  | 0.65542(15) | 0.0123(6)   |
| O4  | 0.33139(13) | 0.9889(2)  | 0.63489(15) | 0.0135(6)   |
| O5  | 0.42151(13) | 0.0709(3)  | 0.60311(15) | 0.0163(6)   |
| O6  | 0.31542(12) | 0.0109(2)  | 0.49724(15) | 0.0111(6)   |
| O7  | 0.28484(12) | 0.1152(2)  | 0.38010(15) | 0.0127(6)   |
| O8  | 0.37382(13) | 0.9857(3)  | 0.41763(15) | 0.0149(6)   |
| O9  | 0.49105(14) | 0.0209(3)  | 0.42905(17) | 0.0191(7)   |
| O10 | 0.32710(13) | 0.9728(3)  | 0.26460(15) | 0.0136(6)   |
| O11 | 0.34434(12) | 0.2332(2)  | 0.51646(14) | 0.0117(6)   |
| O12 | 0.24699(12) | 0.3314(2)  | 0.44097(15) | 0.0119(6)   |
| O13 | 0.30331(12) | 0.3894(2)  | 0.56995(15) | 0.0117(6)   |

|      | <b>x/a</b>  | <b>y/b</b> | <b>z/c</b>  | <b>U(eq)</b> |
|------|-------------|------------|-------------|--------------|
| O90A | 0.5219(4)   | 0.3310(18) | 0.4188(5)   | 0.034(4)     |
| O90B | 0.5260(3)   | 0.2571(17) | 0.4248(4)   | 0.034(4)     |
| O91  | 0.44584(17) | 0.2140(3)  | 0.48178(19) | 0.0309(8)    |
| N1   | 0.40703(15) | 0.1559(3)  | 0.30806(18) | 0.0124(7)    |
| N2   | 0.45981(15) | 0.9784(3)  | 0.28027(17) | 0.0112(7)    |
| N3   | 0.43362(16) | 0.8129(3)  | 0.34675(18) | 0.0131(7)    |
| C1   | 0.37146(18) | 0.2380(4)  | 0.3139(2)   | 0.0141(8)    |
| C2   | 0.36545(19) | 0.3412(4)  | 0.2785(2)   | 0.0176(9)    |
| C3   | 0.39458(19) | 0.3568(4)  | 0.2327(2)   | 0.0173(9)    |
| C4   | 0.43100(18) | 0.2712(4)  | 0.2247(2)   | 0.0142(8)    |
| C5   | 0.43791(18) | 0.1736(4)  | 0.2646(2)   | 0.0120(8)    |
| C6   | 0.47557(18) | 0.0773(4)  | 0.2602(2)   | 0.0125(8)    |
| C7   | 0.48297(17) | 0.8788(4)  | 0.2720(2)   | 0.0114(8)    |
| C8   | 0.47266(18) | 0.7857(4)  | 0.3149(2)   | 0.0118(8)    |
| C9   | 0.50332(19) | 0.6843(4)  | 0.3273(2)   | 0.0154(9)    |
| C10  | 0.49036(19) | 0.6018(4)  | 0.3689(2)   | 0.0162(9)    |
| C11  | 0.44763(19) | 0.6262(4)  | 0.3969(2)   | 0.0179(9)    |
| C12  | 0.42214(19) | 0.7322(4)  | 0.3868(2)   | 0.0171(9)    |
| C13  | 0.26080(19) | 0.8930(3)  | 0.3809(2)   | 0.0138(8)    |
| C14  | 0.28288(18) | 0.7747(4)  | 0.4072(2)   | 0.0129(8)    |
| C15  | 0.27577(19) | 0.6896(3)  | 0.3584(2)   | 0.0137(8)    |

|     | <b>x/a</b>  | <b>y/b</b> | <b>z/c</b> | <b>U(eq)</b> |
|-----|-------------|------------|------------|--------------|
| C16 | 0.31031(18) | 0.7487(4)  | 0.4796(2)  | 0.0145(8)    |
| C17 | 0.29733(19) | 0.5813(4)  | 0.3796(2)  | 0.0143(8)    |
| C18 | 0.33165(19) | 0.6410(4)  | 0.5008(2)  | 0.0151(8)    |
| C19 | 0.32661(18) | 0.5555(4)  | 0.4512(2)  | 0.0140(8)    |
| C20 | 0.35330(18) | 0.4403(4)  | 0.4745(2)  | 0.0130(8)    |

**Table S74.** Bond lengths (Å) for [ $\{\text{Ni}_2(\text{tpypy})_2(\text{H}_2\text{O})_4\}\text{Mo}_4\text{O}_{10}(\text{1,4-O}_3\text{PC}_8\text{H}_8\text{PO}_3)_2\} \cdot 4\text{H}_2\text{O}$  ( $\mathbf{10} \cdot 4\text{H}_2\text{O}$ ).

|          |          |          |          |
|----------|----------|----------|----------|
| Mo1-O2   | 1.691(3) | Mo1-O1   | 1.723(3) |
| Mo1-O3   | 1.909(3) | Mo1-O7   | 1.999(3) |
| Mo1-O13  | 2.128(3) | Mo1-O12  | 2.464(3) |
| Mo2-O4   | 1.707(3) | Mo2-O5   | 1.710(3) |
| Mo2-O3   | 1.905(3) | Mo2-O6   | 1.978(3) |
| Mo2-O11  | 2.173(3) | Mo2-O12  | 2.310(3) |
| Ni1-O8   | 2.019(3) | Ni1-N2   | 2.050(3) |
| Ni1-O10  | 2.051(3) | Ni1-O9   | 2.106(3) |
| Ni1-N3   | 2.111(4) | Ni1-N1   | 2.133(4) |
| P1-O8    | 1.517(3) | P1-O6    | 1.542(3) |
| P1-O7    | 1.544(3) | P1-C13   | 1.794(4) |
| P2-O13   | 1.528(3) | P2-O11   | 1.528(3) |
| P2-O12   | 1.544(3) | P2-C20   | 1.806(4) |
| O7-Mo1   | 1.999(3) | O9-H9C   | 0.85(2)  |
| O9-H9D   | 0.84(2)  | O10-H10C | 0.82(2)  |
| O10-H10D | 0.83(2)  | O11-Mo2  | 2.173(3) |
| O12-Mo2  | 2.310(3) | O12-Mo1  | 2.465(3) |
| O13-Mo1  | 2.128(3) | O91-H91A | 0.85(2)  |
| O91-H91B | 0.86(2)  | N1-C1    | 1.332(5) |
| N1-C5    | 1.370(5) | N2-C6    | 1.342(5) |



|          |          |          |          |
|----------|----------|----------|----------|
| N2-C7    | 1.342(5) | N3-C12   | 1.350(5) |
| N3-C8    | 1.368(5) | C1-C2    | 1.398(6) |
| C1-H1    | 0.95     | C2-C3    | 1.373(6) |
| C2-H2    | 0.95     | C3-C4    | 1.391(6) |
| C3-H3    | 0.95     | C4-C5    | 1.385(6) |
| C4-H4    | 0.95     | C5-C6    | 1.481(6) |
| C6-C6    | 1.389(8) | C7-C7    | 1.423(8) |
| C7-C8    | 1.483(6) | C8-C9    | 1.383(6) |
| C9-C10   | 1.401(6) | C9-H9    | 0.95     |
| C10-C11  | 1.382(6) | C10-H10  | 0.95     |
| C11-C12  | 1.378(7) | C11-H11  | 0.95     |
| C12-H12  | 0.95     | C13-C14  | 1.523(6) |
| C13-H13A | 0.99     | C13-H13B | 0.99     |
| C14-C15  | 1.377(6) | C14-C16  | 1.399(6) |
| C15-C17  | 1.390(6) | C15-H15  | 0.95     |
| C16-C18  | 1.382(6) | C16-H16  | 0.95     |
| C17-C19  | 1.389(6) | C17-H17  | 0.95     |
| C18-C19  | 1.401(6) | C18-H18  | 0.95     |
| C19-C20  | 1.507(6) | C20-H20A | 0.99     |
| C20-H20B | 0.99     |          |          |

**Table S75.** Bond angles (°) for [ $\{\text{Ni}_2(\text{tpypyzy})(\text{H}_2\text{O})_4\}\text{Mo}_4\text{O}_{10}(1,4\text{-O}_3\text{PC}_8\text{H}_8\text{PO}_3)_2\}\cdot 4\text{H}_2\text{O}$  (**10**·4H<sub>2</sub>O).

|             |            |             |            |
|-------------|------------|-------------|------------|
| O2-Mo1-O1   | 104.51(14) | O2-Mo1-O3   | 99.41(14)  |
| O1-Mo1-O3   | 98.07(13)  | O2-Mo1-O7   | 98.87(13)  |
| O1-Mo1-O7   | 89.49(13)  | O3-Mo1-O7   | 157.76(12) |
| O2-Mo1-O13  | 96.08(13)  | O1-Mo1-O13  | 158.43(13) |
| O3-Mo1-O13  | 84.62(12)  | O7-Mo1-O13  | 80.94(11)  |
| O2-Mo1-O12  | 168.90(12) | O1-Mo1-O12  | 83.96(12)  |
| O3-Mo1-O12  | 71.93(11)  | O7-Mo1-O12  | 88.23(11)  |
| O13-Mo1-O12 | 76.52(10)  | O4-Mo2-O5   | 102.96(14) |
| O4-Mo2-O3   | 97.67(13)  | O5-Mo2-O3   | 98.48(13)  |
| O4-Mo2-O6   | 93.33(13)  | O5-Mo2-O6   | 95.92(13)  |
| O3-Mo2-O6   | 159.42(12) | O4-Mo2-O11  | 165.47(12) |
| O5-Mo2-O11  | 91.13(13)  | O3-Mo2-O11  | 83.57(12)  |
| O6-Mo2-O11  | 81.51(11)  | O4-Mo2-O12  | 90.23(12)  |
| O5-Mo2-O12  | 166.29(13) | O3-Mo2-O12  | 75.74(11)  |
| O6-Mo2-O12  | 86.91(11)  | O11-Mo2-O12 | 75.98(10)  |
| O8-Ni1-N2   | 171.20(13) | O8-Ni1-O10  | 90.21(12)  |
| N2-Ni1-O10  | 98.12(12)  | O8-Ni1-O9   | 84.78(12)  |
| N2-Ni1-O9   | 87.31(13)  | O10-Ni1-O9  | 171.09(13) |
| O8-Ni1-N3   | 99.29(13)  | N2-Ni1-N3   | 76.95(14)  |
| O10-Ni1-N3  | 97.18(13)  | O9-Ni1-N3   | 90.91(13)  |

|               |            |              |            |
|---------------|------------|--------------|------------|
| O8-Ni1-N1     | 106.00(13) | N2-Ni1-N1    | 77.79(14)  |
| O10-Ni1-N1    | 84.52(13)  | O9-Ni1-N1    | 89.77(13)  |
| N3-Ni1-N1     | 154.66(13) | O8-P1-O6     | 111.62(16) |
| O8-P1-O7      | 110.30(16) | O6-P1-O7     | 110.19(16) |
| O8-P1-C13     | 113.21(19) | O6-P1-C13    | 103.78(18) |
| O7-P1-C13     | 107.49(18) | O13-P2-O11   | 111.63(16) |
| O13-P2-O12    | 112.09(16) | O11-P2-O12   | 112.23(16) |
| O13-P2-C20    | 108.35(18) | O11-P2-C20   | 103.87(17) |
| O12-P2-C20    | 108.21(18) | Mo2-O3-Mo1   | 123.14(15) |
| P1-O6-Mo2     | 144.89(18) | P1-O7-Mo1    | 139.54(18) |
| P1-O8-Ni1     | 137.19(18) | Ni1-O9-H9C   | 119.(4)    |
| Ni1-O9-H9D    | 123.(4)    | H9C-O9-H9D   | 89.(5)     |
| Ni1-O10-H10C  | 110.(4)    | Ni1-O10-H10D | 108.(4)    |
| H10C-O10-H10D | 110.(5)    | P2-O11-Mo2   | 130.26(16) |
| P2-O12-Mo2    | 137.04(17) | P2-O12-Mo1   | 133.00(16) |
| Mo2-O12-Mo1   | 89.19(9)   | P2-O13-Mo1   | 130.80(17) |
| H91A-O91-H91B | 102.(6)    | C1-N1-C5     | 118.2(4)   |
| C1-N1-Ni1     | 127.3(3)   | C5-N1-Ni1    | 113.5(3)   |
| C6-N2-C7      | 123.3(4)   | C6-N2-Ni1    | 116.9(3)   |
| C7-N2-Ni1     | 118.7(3)   | C12-N3-C8    | 117.0(4)   |
| C12-N3-Ni1    | 126.4(3)   | C8-N3-Ni1    | 115.6(3)   |
| N1-C1-C2      | 122.5(4)   | N1-C1-H1     | 118.7      |

|             |          |               |          |
|-------------|----------|---------------|----------|
| C2-C1-H1    | 118.7    | C3-C2-C1      | 119.1(4) |
| C3-C2-H2    | 120.5    | C1-C2-H2      | 120.5    |
| C2-C3-C4    | 119.3(4) | C2-C3-H3      | 120.4    |
| C4-C3-H3    | 120.4    | C5-C4-C3      | 118.8(4) |
| C5-C4-H4    | 120.6    | C3-C4-H4      | 120.6    |
| N1-C5-C4    | 122.0(4) | N1-C5-C6      | 114.6(4) |
| C4-C5-C6    | 123.3(4) | N2-C6-C6      | 117.4(2) |
| N2-C6-C5    | 113.8(4) | C6-C6-C5      | 128.8(2) |
| N2-C7-C7    | 116.4(2) | N2-C7-C8      | 114.2(3) |
| C7-C7-C8    | 129.3(2) | N3-C8-C9      | 122.3(4) |
| N3-C8-C7    | 113.6(4) | C9-C8-C7      | 123.8(4) |
| C8-C9-C10   | 119.3(4) | C8-C9-H9      | 120.3    |
| C10-C9-H9   | 120.3    | C11-C10-C9    | 118.2(4) |
| C11-C10-H10 | 120.9    | C9-C10-H10    | 120.9    |
| C12-C11-C10 | 119.4(4) | C12-C11-H11   | 120.3    |
| C10-C11-H11 | 120.3    | N3-C12-C11    | 123.5(4) |
| N3-C12-H12  | 118.3    | C11-C12-H12   | 118.3    |
| C14-C13-P1  | 115.8(3) | C14-C13-H13A  | 108.3    |
| P1-C13-H13A | 108.3    | C14-C13-H13B  | 108.3    |
| P1-C13-H13B | 108.3    | H13A-C13-H13B | 107.4    |
| C15-C14-C16 | 118.4(4) | C15-C14-C13   | 119.3(4) |
| C16-C14-C13 | 122.3(4) | C14-C15-C17   | 121.4(4) |

|             |          |               |          |
|-------------|----------|---------------|----------|
| C14-C15-H15 | 119.3    | C17-C15-H15   | 119.3    |
| C18-C16-C14 | 120.3(4) | C18-C16-H16   | 119.9    |
| C14-C16-H16 | 119.9    | C19-C17-C15   | 120.7(4) |
| C19-C17-H17 | 119.6    | C15-C17-H17   | 119.6    |
| C16-C18-C19 | 121.4(4) | C16-C18-H18   | 119.3    |
| C19-C18-H18 | 119.3    | C17-C19-C18   | 117.7(4) |
| C17-C19-C20 | 121.1(4) | C18-C19-C20   | 121.1(4) |
| C19-C20-P2  | 116.1(3) | C19-C20-H20A  | 108.3    |
| P2-C20-H20A | 108.3    | C19-C20-H20B  | 108.3    |
| P2-C20-H20B | 108.3    | H20A-C20-H20B | 107.4    |

**Table S76.** Torsion angles (°) for [ $\{\text{Ni}_2(\text{tpypyzy})(\text{H}_2\text{O})_4\}\text{Mo}_4\text{O}_{10}(1,4\text{-O}_3\text{PC}_8\text{H}_8\text{PO}_3)_2\}\cdot 4\text{H}_2\text{O}$  ( $10\cdot 4\text{H}_2\text{O}$ ).

|                |           |                |             |
|----------------|-----------|----------------|-------------|
| O8-P1-O6-Mo2   | 63.2(3)   | O7-P1-O6-Mo2   | -59.7(3)    |
| C13-P1-O6-Mo2  | -174.5(3) | O8-P1-O7-Mo1   | 167.6(2)    |
| O6-P1-O7-Mo1   | -68.7(3)  | C13-P1-O7-Mo1  | 43.8(3)     |
| O6-P1-O8-Ni1   | -171.4(2) | O7-P1-O8-Ni1   | -48.6(3)    |
| C13-P1-O8-Ni1  | 71.9(3)   | O13-P2-O11-Mo2 | 36.0(3)     |
| O12-P2-O11-Mo2 | -90.8(2)  | C20-P2-O11-Mo2 | 152.5(2)    |
| O13-P2-O12-Mo2 | 20.4(3)   | O11-P2-O12-Mo2 | 147.0(2)    |
| C20-P2-O12-Mo2 | -99.0(3)  | O13-P2-O12-Mo1 | -146.26(19) |
| O11-P2-O12-Mo1 | -19.7(3)  | C20-P2-O12-Mo1 | 94.3(2)     |
| O11-P2-O13-Mo1 | -36.0(3)  | O12-P2-O13-Mo1 | 90.9(2)     |
| C20-P2-O13-Mo1 | -149.8(2) | C5-N1-C1-C2    | -1.1(6)     |
| Ni1-N1-C1-C2   | -168.7(3) | N1-C1-C2-C3    | 3.7(6)      |
| C1-C2-C3-C4    | -2.3(6)   | C2-C3-C4-C5    | -1.6(6)     |
| C1-N1-C5-C4    | -3.0(6)   | Ni1-N1-C5-C4   | 166.3(3)    |
| C1-N1-C5-C6    | -179.0(4) | Ni1-N1-C5-C6   | -9.7(4)     |
| C3-C4-C5-N1    | 4.3(6)    | C3-C4-C5-C6    | 180.0(4)    |
| C7-N2-C6-C6    | -9.9(7)   | Ni1-N2-C6-C6   | 158.1(4)    |
| C7-N2-C6-C5    | 171.4(4)  | Ni1-N2-C6-C5   | -20.7(4)    |
| N1-C5-C6-N2    | 19.8(5)   | C4-C5-C6-N2    | -156.2(4)   |
| N1-C5-C6-C6    | -158.8(5) | C4-C5-C6-C6    | 25.3(8)     |

|                 |           |                 |           |
|-----------------|-----------|-----------------|-----------|
| C6-N2-C7-C7     | -11.9(7)  | Ni1-N2-C7-C7    | -179.7(4) |
| C6-N2-C7-C8     | 163.9(4)  | Ni1-N2-C7-C8    | -3.9(4)   |
| C12-N3-C8-C9    | -5.4(6)   | Ni1-N3-C8-C9    | 163.7(3)  |
| C12-N3-C8-C7    | -179.9(3) | Ni1-N3-C8-C7    | -10.8(4)  |
| N2-C7-C8-N3     | 9.6(5)    | C7-C7-C8-N3     | -175.3(5) |
| N2-C7-C8-C9     | -164.8(4) | C7-C7-C8-C9     | 10.3(8)   |
| N3-C8-C9-C10    | 5.8(6)    | C7-C8-C9-C10    | 179.7(4)  |
| C8-C9-C10-C11   | -0.9(6)   | C9-C10-C11-C12  | -4.0(6)   |
| C8-N3-C12-C11   | 0.2(6)    | Ni1-N3-C12-C11  | -167.6(3) |
| C10-C11-C12-N3  | 4.6(7)    | O8-P1-C13-C14   | 51.1(4)   |
| O6-P1-C13-C14   | -70.1(3)  | O7-P1-C13-C14   | 173.2(3)  |
| P1-C13-C14-C15  | -132.1(3) | P1-C13-C14-C16  | 47.9(5)   |
| C16-C14-C15-C17 | -2.7(6)   | C13-C14-C15-C17 | 177.3(4)  |
| C15-C14-C16-C18 | 2.4(6)    | C13-C14-C16-C18 | -177.6(4) |
| C14-C15-C17-C19 | 0.3(6)    | C14-C16-C18-C19 | 0.1(6)    |
| C15-C17-C19-C18 | 2.2(6)    | C15-C17-C19-C20 | -176.4(4) |
| C16-C18-C19-C17 | -2.4(6)   | C16-C18-C19-C20 | 176.2(4)  |
| C17-C19-C20-P2  | -98.3(4)  | C18-C19-C20-P2  | 83.1(4)   |
| O13-P2-C20-C19  | -65.7(3)  | O11-P2-C20-C19  | 175.5(3)  |
| O12-P2-C20-C19  | 56.0(3)   |                 |           |

**Table S77.** Anisotropic atomic displacement parameters ( $\text{\AA}^2$ ) for  
 $[\{\text{Ni}_2(\text{tpypy})_2(\text{H}_2\text{O})_4\}\text{Mo}_4\text{O}_{10}(1,4\text{-O}_3\text{PC}_8\text{H}_8\text{PO}_3)_2]\cdot 4\text{H}_2\text{O}$  (**10**·4H<sub>2</sub>O).

The anisotropic atomic displacement factor exponent takes the form:  $-2\pi^2 [ h^2 a^{*2} U_{11} + \dots + 2 h k a^* b^* U_{12} ]$

|     | $U_{11}$   | $U_{22}$   | $U_{33}$    | $U_{23}$    | $U_{13}$    | $U_{12}$    |
|-----|------------|------------|-------------|-------------|-------------|-------------|
| Mo1 | 0.0149(2)  | 0.0137(2)  | 0.00270(18) | 0.00007(13) | 0.00368(14) | 0.00099(13) |
| Mo2 | 0.0127(2)  | 0.0136(2)  | 0.00254(19) | 0.00088(13) | 0.00304(14) | 0.00148(13) |
| Ni1 | 0.0139(3)  | 0.0155(3)  | 0.0046(3)   | -0.0005(2)  | 0.0043(2)   | 0.0010(2)   |
| P1  | 0.0144(5)  | 0.0134(5)  | 0.0031(5)   | 0.0003(4)   | 0.0045(4)   | 0.0016(4)   |
| P2  | 0.0138(5)  | 0.0116(5)  | 0.0022(5)   | 0.0006(4)   | 0.0025(4)   | 0.0006(4)   |
| O1  | 0.0192(15) | 0.0189(15) | 0.0057(14)  | 0.0016(11)  | 0.0069(12)  | 0.0028(12)  |
| O2  | 0.0215(16) | 0.0187(16) | 0.0085(15)  | -0.0058(12) | 0.0042(12)  | 0.0001(12)  |
| O3  | 0.0141(14) | 0.0168(15) | 0.0055(13)  | -0.0005(11) | 0.0030(11)  | 0.0019(11)  |
| O4  | 0.0212(15) | 0.0165(15) | 0.0039(13)  | -0.0004(11) | 0.0061(12)  | 0.0008(12)  |
| O5  | 0.0165(15) | 0.0237(17) | 0.0079(14)  | 0.0004(12)  | 0.0037(12)  | 0.0038(12)  |
| O6  | 0.0153(14) | 0.0140(15) | 0.0040(13)  | 0.0002(10)  | 0.0036(11)  | 0.0014(11)  |
| O7  | 0.0148(14) | 0.0157(15) | 0.0088(14)  | 0.0018(12)  | 0.0056(12)  | 0.0016(11)  |
| O8  | 0.0182(15) | 0.0226(16) | 0.0042(13)  | 0.0041(12)  | 0.0047(12)  | 0.0064(12)  |
| O9  | 0.0176(15) | 0.0250(17) | 0.0098(15)  | -0.0016(13) | -0.0006(12) | 0.0065(13)  |
| O10 | 0.0176(14) | 0.0190(16) | 0.0039(14)  | -0.0008(12) | 0.0037(12)  | -0.0025(12) |
| O11 | 0.0158(14) | 0.0151(14) | 0.0053(13)  | 0.0012(11)  | 0.0052(11)  | -0.0006(11) |
| O12 | 0.0132(14) | 0.0175(15) | 0.0044(13)  | -0.0015(11) | 0.0029(11)  | -0.0018(11) |
| O13 | 0.0157(14) | 0.0156(15) | 0.0039(13)  | 0.0005(11)  | 0.0039(11)  | -0.0006(11) |



|      | $U_{11}$   | $U_{22}$   | $U_{33}$   | $U_{23}$    | $U_{13}$    | $U_{12}$    |
|------|------------|------------|------------|-------------|-------------|-------------|
| O90A | 0.041(5)   | 0.036(11)  | 0.023(5)   | 0.007(4)    | 0.008(4)    | 0.000(5)    |
| O90B | 0.034(4)   | 0.055(12)  | 0.015(4)   | -0.002(4)   | 0.011(3)    | -0.005(4)   |
| O91  | 0.033(2)   | 0.042(2)   | 0.0196(18) | -0.0040(16) | 0.0124(16)  | 0.0107(18)  |
| N1   | 0.0126(16) | 0.0161(17) | 0.0081(17) | -0.0028(14) | 0.0035(13)  | -0.0017(13) |
| N2   | 0.0127(16) | 0.0160(17) | 0.0033(15) | -0.0005(13) | 0.0013(13)  | -0.0011(13) |
| N3   | 0.0180(17) | 0.0196(18) | 0.0018(16) | 0.0003(13)  | 0.0037(13)  | -0.0006(14) |
| C1   | 0.0148(19) | 0.017(2)   | 0.011(2)   | -0.0019(17) | 0.0060(16)  | 0.0009(16)  |
| C2   | 0.015(2)   | 0.020(2)   | 0.017(2)   | -0.0005(18) | 0.0050(17)  | 0.0022(17)  |
| C3   | 0.019(2)   | 0.016(2)   | 0.015(2)   | 0.0016(17)  | 0.0049(17)  | 0.0013(17)  |
| C4   | 0.015(2)   | 0.018(2)   | 0.010(2)   | -0.0014(16) | 0.0049(16)  | -0.0008(16) |
| C5   | 0.0114(18) | 0.016(2)   | 0.0056(19) | -0.0021(15) | -0.0003(15) | -0.0008(15) |
| C6   | 0.017(2)   | 0.016(2)   | 0.0026(18) | 0.0007(15)  | 0.0018(16)  | -0.0014(16) |
| C7   | 0.0082(18) | 0.016(2)   | 0.0058(18) | -0.0007(16) | -0.0019(15) | -0.0022(15) |
| C8   | 0.0156(19) | 0.015(2)   | 0.0051(18) | 0.0012(16)  | 0.0048(15)  | -0.0009(16) |
| C9   | 0.019(2)   | 0.016(2)   | 0.013(2)   | -0.0019(17) | 0.0081(17)  | -0.0012(16) |
| C10  | 0.020(2)   | 0.019(2)   | 0.011(2)   | 0.0010(17)  | 0.0075(17)  | -0.0008(17) |
| C11  | 0.021(2)   | 0.022(2)   | 0.012(2)   | 0.0036(18)  | 0.0082(18)  | -0.0008(18) |
| C12  | 0.019(2)   | 0.024(2)   | 0.010(2)   | 0.0055(18)  | 0.0076(17)  | 0.0010(18)  |
| C13  | 0.017(2)   | 0.016(2)   | 0.0075(19) | -0.0032(16) | 0.0036(16)  | -0.0024(16) |
| C14  | 0.0124(19) | 0.016(2)   | 0.0106(19) | 0.0016(16)  | 0.0052(16)  | 0.0026(16)  |
| C15  | 0.017(2)   | 0.019(2)   | 0.0048(18) | -0.0007(15) | 0.0039(16)  | -0.0019(16) |

|     | <b>U<sub>11</sub></b> | <b>U<sub>22</sub></b> | <b>U<sub>33</sub></b> | <b>U<sub>23</sub></b> | <b>U<sub>13</sub></b> | <b>U<sub>12</sub></b> |
|-----|-----------------------|-----------------------|-----------------------|-----------------------|-----------------------|-----------------------|
| C16 | 0.020(2)              | 0.017(2)              | 0.0074(19)            | -0.0019(16)           | 0.0061(16)            | -0.0014(17)           |
| C17 | 0.020(2)              | 0.016(2)              | 0.0070(19)            | -0.0037(16)           | 0.0058(16)            | -0.0037(16)           |
| C18 | 0.019(2)              | 0.020(2)              | 0.0050(19)            | -0.0014(16)           | 0.0032(16)            | -0.0026(17)           |
| C19 | 0.015(2)              | 0.018(2)              | 0.011(2)              | 0.0011(16)            | 0.0075(16)            | -0.0019(16)           |
| C20 | 0.0132(19)            | 0.015(2)              | 0.013(2)              | 0.0018(16)            | 0.0079(16)            | -0.0003(16)           |

**Table S78.** Hydrogen atomic coordinates and isotropic atomic displacement parameters ( $\text{\AA}^2$ ) for  $[\{\text{Ni}_2(\text{tpypy})_2(\text{H}_2\text{O})_4\}\text{Mo}_4\text{O}_{10}(1,4\text{-O}_3\text{PC}_8\text{H}_8\text{PO}_3)_2]\cdot 4\text{H}_2\text{O}$  (**10**·4H<sub>2</sub>O).

|      | <b>x/a</b> | <b>y/b</b> | <b>z/c</b> | <b>U(eq)</b> |
|------|------------|------------|------------|--------------|
| H9C  | 0.5235(15) | 0.993(4)   | 0.429(3)   | 0.023        |
| H9D  | 0.507(2)   | 1.085(3)   | 0.436(3)   | 0.023        |
| H10C | 0.327(2)   | 0.998(4)   | 0.2271(17) | 0.016        |
| H10D | 0.318(2)   | 0.9047(19) | 0.260(3)   | 0.016        |
| H91A | 0.440(3)   | 0.148(3)   | 0.465(3)   | 0.037        |
| H91B | 0.4145(17) | 0.225(5)   | 0.491(3)   | 0.037        |
| H1   | 0.3493     | 1.2259     | 0.3433     | 0.017        |
| H2   | 0.3415     | 1.3997     | 0.2860     | 0.021        |
| H3   | 0.3899     | 1.4253     | 0.2068     | 0.021        |
| H4   | 0.4508     | 1.2795     | 0.1924     | 0.017        |
| H9   | 0.5329     | 0.6706     | 0.3079     | 0.018        |
| H10  | 0.5104     | 0.5311     | 0.3776     | 0.019        |
| H11  | 0.4359     | 0.5705     | 0.4227     | 0.021        |
| H12  | 0.3951     | 0.7493     | 0.4093     | 0.02         |
| H13A | 0.2239     | 0.9074     | 0.3899     | 0.017        |
| H13B | 0.2500     | 0.8951     | 0.3288     | 0.017        |
| H15  | 0.2557     | 0.7053     | 0.3092     | 0.016        |
| H16  | 0.3143     | 0.8053     | 0.5142     | 0.017        |
| H17  | 0.2920     | 0.5244     | 0.3448     | 0.017        |

|      | <b>x/a</b> | <b>y/b</b> | <b>z/c</b> | <b>U(eq)</b> |
|------|------------|------------|------------|--------------|
| H18  | 0.3501     | 0.6246     | 0.5501     | 0.018        |
| H20A | 0.3923     | 0.4500     | 0.5144     | 0.016        |
| H20B | 0.3614     | 0.4054     | 0.4347     | 0.016        |

**Table S79.** Sample and crystal data for  $[\{\text{Ni}(2,2'\text{-dpa})(\text{H}_2\text{O})\}_2\text{Mo}_5\text{O}_{15}(1,4\text{-O}_3\text{PC}_8\text{H}_8\text{PO}_3)]\cdot 2\text{H}_2\text{O}$  (**11**·2H<sub>2</sub>O).

|                        |                                                                                                                                                           |                              |
|------------------------|-----------------------------------------------------------------------------------------------------------------------------------------------------------|------------------------------|
| Identification code    | $[\{\text{Ni}(2,2'\text{-dpa})(\text{H}_2\text{O})\}_2\text{Mo}_5\text{O}_{15}(1,4\text{-O}_3\text{PC}_8\text{H}_8\text{PO}_3)]\cdot 2\text{H}_2\text{O}$ |                              |
| Chemical formula       | $\text{C}_{28}\text{H}_{34}\text{Mo}_5\text{N}_6\text{Ni}_2\text{O}_{25}\text{P}_2$                                                                       |                              |
| Formula weight         | 1513.67                                                                                                                                                   |                              |
| Temperature            | 90(2) K                                                                                                                                                   |                              |
| Wavelength             | 0.71073 Å                                                                                                                                                 |                              |
| Crystal size           | 0.068 x 0.101 x 0.209 mm                                                                                                                                  |                              |
| Crystal system         | Monoclinic                                                                                                                                                |                              |
| Space group            | C2/c                                                                                                                                                      |                              |
| Unit cell dimensions   | $a = 17.3753(12)$ Å                                                                                                                                       | $\alpha = 90^\circ$          |
|                        | $b = 11.3661(8)$ Å                                                                                                                                        | $\beta = 103.1180(10)^\circ$ |
|                        | $c = 22.3579(15)$ Å                                                                                                                                       | $\gamma = 90^\circ$          |
| Volume                 | 4300.2(5) Å <sup>3</sup>                                                                                                                                  |                              |
| Z                      | 4                                                                                                                                                         |                              |
| Density (calculated)   | 2.338 g/cm <sup>3</sup>                                                                                                                                   |                              |
| Absorption coefficient | 2.440 mm <sup>-1</sup>                                                                                                                                    |                              |
| F(000)                 | 2960                                                                                                                                                      |                              |

**Table S80.** Data collection and structure refinement for [ {Ni(2,2'-dpa)(H<sub>2</sub>O)}<sub>2</sub>Mo<sub>5</sub>O<sub>15</sub>(1,4-O<sub>3</sub>PC<sub>8</sub>H<sub>8</sub>PO<sub>3</sub>)]·2H<sub>2</sub>O (**11**·2H<sub>2</sub>O).

|                                     |                                                                                                                                                                |                           |
|-------------------------------------|----------------------------------------------------------------------------------------------------------------------------------------------------------------|---------------------------|
| Theta range for data collection     | 1.87 to 26.37°                                                                                                                                                 |                           |
| Index ranges                        | -21<=h<=21, -14<=k<=14, -27<=l<=27                                                                                                                             |                           |
| Reflections collected               | 33502                                                                                                                                                          |                           |
| Independent reflections             | 4381 [R(int) = 0.0651]                                                                                                                                         |                           |
| Coverage of independent reflections | 100.0%                                                                                                                                                         |                           |
| Absorption correction               | multi-scan                                                                                                                                                     |                           |
| Max. and min. transmission          | 0.8520 and 0.6300                                                                                                                                              |                           |
| Refinement method                   | Full-matrix least-squares on F <sup>2</sup>                                                                                                                    |                           |
| Refinement program                  | SHELXL-2013 (Sheldrick, 2013)                                                                                                                                  |                           |
| Function minimized                  | $\Sigma w(F_o^2 - F_c^2)^2$                                                                                                                                    |                           |
| Data / restraints / parameters      | 4381 / 96 / 317                                                                                                                                                |                           |
| Goodness-of-fit on F <sup>2</sup>   | 1.033                                                                                                                                                          |                           |
| $\Delta/\sigma_{\max}$              | 0.001                                                                                                                                                          |                           |
| Final R indices                     | 3679 data; I>2σ(I)                                                                                                                                             | R1 = 0.0317, wR2 = 0.0636 |
|                                     | all data                                                                                                                                                       | R1 = 0.0442, wR2 = 0.0672 |
| Weighting scheme                    | w=1/[σ <sup>2</sup> (F <sub>o</sub> <sup>2</sup> )+(0.0288P) <sup>2</sup> +17.3963P]<br>where P=(F <sub>o</sub> <sup>2</sup> +2F <sub>c</sub> <sup>2</sup> )/3 |                           |
| Largest diff. peak and hole         | 1.561 and -0.752 eÅ <sup>-3</sup>                                                                                                                              |                           |
| R.M.S. deviation from mean          | 0.130 eÅ <sup>-3</sup>                                                                                                                                         |                           |

**Table S81.** Atomic coordinates and equivalent isotropic atomic displacement parameters ( $\text{\AA}^2$ ) for  $[\{\text{Ni}(2,2'\text{-dpa})(\text{H}_2\text{O})\}_2\text{Mo}_5\text{O}_{15}(1,4\text{-O}_3\text{PC}_8\text{H}_8\text{PO}_3)]\cdot 2\text{H}_2\text{O}$  (**11** $\cdot 2\text{H}_2\text{O}$ ).

$U(\text{eq})$  is defined as one third of the trace of the orthogonalized  $U_{ij}$  tensor.

|     | <b>x/a</b>  | <b>y/b</b> | <b>z/c</b>  | <b>U(eq)</b> |
|-----|-------------|------------|-------------|--------------|
| Mo1 | 0.39635(2)  | 0.42202(3) | 0.70708(2)  | 0.00753(9)   |
| Mo2 | 0.35739(2)  | 0.70639(3) | 0.66782(2)  | 0.00662(9)   |
| Mo3 | 0.5         | 0.87807(4) | 0.75        | 0.00847(11)  |
| Ni1 | 0.19148(3)  | 0.90381(5) | 0.67989(2)  | 0.00937(12)  |
| P1  | 0.04754(6)  | 0.11857(9) | 0.67987(5)  | 0.0067(2)    |
| O1  | 0.5         | 0.3785(3)  | 0.75        | 0.0090(8)    |
| O2  | 0.39153(17) | 0.3588(2)  | 0.63794(13) | 0.0122(6)    |
| O3  | 0.33670(16) | 0.3303(3)  | 0.73937(13) | 0.0111(6)    |
| O4  | 0.32306(15) | 0.5516(2)  | 0.68583(12) | 0.0079(6)    |
| O5  | 0.33608(16) | 0.7009(3)  | 0.58966(12) | 0.0123(6)    |
| O6  | 0.43634(16) | 0.8248(2)  | 0.67418(12) | 0.0089(6)    |
| O7  | 0.56439(17) | 0.9700(3)  | 0.72573(14) | 0.0151(6)    |
| O8  | 0.28043(16) | 0.7856(2)  | 0.68478(12) | 0.0111(6)    |
| O9  | 0.27095(17) | 0.0102(3)  | 0.73826(14) | 0.0153(7)    |
| O10 | 0.09931(15) | 0.0105(2)  | 0.69591(12) | 0.0077(6)    |
| O11 | 0.07622(15) | 0.2179(2)  | 0.72595(12) | 0.0082(6)    |
| O12 | 0.96087(15) | 0.0843(2)  | 0.68083(12) | 0.0080(6)    |
| O90 | 0.3391(10)  | 0.0844(16) | 0.3800(7)   | 0.306(8)     |

|     | <b>x/a</b> | <b>y/b</b> | <b>z/c</b>  | <b>U(eq)</b> |
|-----|------------|------------|-------------|--------------|
| N1  | 0.2212(2)  | 0.9859(3)  | 0.60692(15) | 0.0109(7)    |
| N2  | 0.1796(2)  | 0.8239(3)  | 0.54005(16) | 0.0130(7)    |
| N3  | 0.1159(2)  | 0.7933(3)  | 0.62235(16) | 0.0126(7)    |
| C1  | 0.2556(2)  | 0.0940(4)  | 0.6142(2)   | 0.0155(9)    |
| C2  | 0.2886(3)  | 0.1464(4)  | 0.5712(2)   | 0.0190(10)   |
| C3  | 0.2896(3)  | 0.0855(4)  | 0.5174(2)   | 0.0191(10)   |
| C4  | 0.2552(3)  | 0.9773(4)  | 0.5086(2)   | 0.0158(9)    |
| C5  | 0.2188(2)  | 0.9310(4)  | 0.55338(19) | 0.0119(8)    |
| C6  | 0.1230(2)  | 0.7695(4)  | 0.56482(19) | 0.0118(8)    |
| C7  | 0.0744(3)  | 0.6867(4)  | 0.5279(2)   | 0.0144(9)    |
| C8  | 0.0166(3)  | 0.6313(4)  | 0.5502(2)   | 0.0176(10)   |
| C9  | 0.0084(3)  | 0.6560(4)  | 0.6088(2)   | 0.0189(10)   |
| C10 | 0.0593(3)  | 0.7358(4)  | 0.6431(2)   | 0.0161(9)    |
| C11 | 0.0464(2)  | 0.1678(4)  | 0.60291(17) | 0.0103(8)    |
| C12 | 0.0224(2)  | 0.0793(4)  | 0.55058(17) | 0.0114(8)    |
| C13 | 0.0630(2)  | 0.0748(4)  | 0.50367(18) | 0.0107(8)    |
| C14 | 0.0415(2)  | 0.9975(4)  | 0.45441(18) | 0.0118(9)    |



**Table S82.** Bond lengths (Å) for [ $\{\text{Ni}(2,2'\text{-dpa})(\text{H}_2\text{O})\}_2\text{Mo}_5\text{O}_{15}(1,4\text{-O}_3\text{PC}_8\text{H}_8\text{PO}_3)\} \cdot 2\text{H}_2\text{O}$  (**11**·2H<sub>2</sub>O).

|         |            |         |           |
|---------|------------|---------|-----------|
| Mo1-O2  | 1.689(3)   | Mo1-O3  | 1.738(3)  |
| Mo1-O1  | 1.9036(11) | Mo1-O4  | 1.935(3)  |
| Mo1-O12 | 2.303(3)   | Mo1-O10 | 2.376(3)  |
| Mo2-O5  | 1.703(3)   | Mo2-O8  | 1.724(3)  |
| Mo2-O6  | 1.904(3)   | Mo2-O4  | 1.929(3)  |
| Mo2-O12 | 2.237(3)   | Mo2-O11 | 2.397(3)  |
| Mo3-O7  | 1.707(3)   | Mo3-O7  | 1.707(3)  |
| Mo3-O6  | 1.901(3)   | Mo3-O6  | 1.901(3)  |
| Mo3-O11 | 2.383(3)   | Mo3-O11 | 2.383(3)  |
| Ni1-O8  | 2.032(3)   | Ni1-N1  | 2.045(3)  |
| Ni1-N3  | 2.048(4)   | Ni1-O9  | 2.062(3)  |
| Ni1-O10 | 2.104(3)   | Ni1-O3  | 2.144(3)  |
| P1-O10  | 1.516(3)   | P1-O11  | 1.534(3)  |
| P1-O12  | 1.560(3)   | P1-C11  | 1.805(4)  |
| O1-Mo1  | 1.9036(11) | O3-Ni1  | 2.144(3)  |
| O9-H9C  | 0.824(19)  | O9-H9D  | 0.828(19) |
| O10-Mo1 | 2.376(3)   | O11-Mo3 | 2.383(3)  |
| O11-Mo2 | 2.397(3)   | O12-Mo2 | 2.237(3)  |
| O12-Mo1 | 2.303(3)   | N1-C5   | 1.342(5)  |
| N1-C1   | 1.360(6)   | N2-C6   | 1.380(5)  |

|          |          |          |           |
|----------|----------|----------|-----------|
| N2-C5    | 1.393(5) | N2-H2'   | 0.872(19) |
| N3-C6    | 1.347(5) | N3-C10   | 1.348(5)  |
| C1-C2    | 1.364(6) | C1-H1    | 0.95      |
| C2-C3    | 1.391(6) | C2-H2    | 0.95      |
| C3-C4    | 1.362(6) | C3-H3    | 0.95      |
| C4-C5    | 1.402(6) | C4-H4    | 0.95      |
| C6-C7    | 1.402(6) | C7-C8    | 1.372(6)  |
| C7-H7    | 0.95     | C8-C9    | 1.378(6)  |
| C8-H8    | 0.95     | C9-C10   | 1.373(6)  |
| C9-H9    | 0.95     | C10-H10  | 0.95      |
| C11-C12  | 1.528(6) | C11-H11A | 0.99      |
| C11-H11B | 0.99     | C12-C13  | 1.391(5)  |
| C12-C14  | 1.397(6) | C13-C14  | 1.392(6)  |
| C13-H13  | 0.95     | C14-C12  | 1.397(6)  |
| C14-H14  | 0.95     |          |           |

**Table S83.** Bond angles (°) for [ $\{\text{Ni}(2,2'\text{-dpa})(\text{H}_2\text{O})\}_2\text{Mo}_5\text{O}_{15}(1,4\text{-O}_3\text{PC}_8\text{H}_8\text{PO}_3)\} \cdot 2\text{H}_2\text{O}$  (**11**·2H<sub>2</sub>O).

|             |            |             |            |
|-------------|------------|-------------|------------|
| O2-Mo1-O3   | 102.39(13) | O2-Mo1-O1   | 101.28(11) |
| O3-Mo1-O1   | 102.71(12) | O2-Mo1-O4   | 101.88(13) |
| O3-Mo1-O4   | 97.89(12)  | O1-Mo1-O4   | 144.70(14) |
| O2-Mo1-O12  | 91.91(12)  | O3-Mo1-O12  | 163.12(11) |
| O1-Mo1-O12  | 82.93(12)  | O4-Mo1-O12  | 70.05(10)  |
| O2-Mo1-O10  | 178.99(12) | O3-Mo1-O10  | 76.89(11)  |
| O1-Mo1-O10  | 79.60(9)   | O4-Mo1-O10  | 77.56(10)  |
| O12-Mo1-O10 | 88.69(9)   | O5-Mo2-O8   | 104.24(13) |
| O5-Mo2-O6   | 95.04(13)  | O8-Mo2-O6   | 101.29(13) |
| O5-Mo2-O4   | 100.09(13) | O8-Mo2-O4   | 97.95(12)  |
| O6-Mo2-O4   | 151.74(11) | O5-Mo2-O12  | 95.27(12)  |
| O8-Mo2-O12  | 159.36(11) | O6-Mo2-O12  | 83.38(11)  |
| O4-Mo2-O12  | 71.63(10)  | O5-Mo2-O11  | 164.22(11) |
| O8-Mo2-O11  | 88.64(11)  | O6-Mo2-O11  | 73.19(10)  |
| O4-Mo2-O11  | 86.85(10)  | O12-Mo2-O11 | 73.34(9)   |
| O7-Mo3-O7   | 104.5(2)   | O7-Mo3-O6   | 101.67(13) |
| O7-Mo3-O6   | 100.82(13) | O7-Mo3-O6   | 100.82(13) |
| O7-Mo3-O6   | 101.67(13) | O6-Mo3-O6   | 142.87(17) |
| O7-Mo3-O11  | 167.75(12) | O7-Mo3-O11  | 87.60(12)  |
| O6-Mo3-O11  | 73.58(10)  | O6-Mo3-O11  | 78.25(11)  |

|             |            |             |            |
|-------------|------------|-------------|------------|
| O7-Mo3-O11  | 87.60(12)  | O7-Mo3-O11  | 167.75(12) |
| O6-Mo3-O11  | 78.25(11)  | O6-Mo3-O11  | 73.58(10)  |
| O11-Mo3-O11 | 80.41(13)  | O8-Ni1-N1   | 91.01(12)  |
| O8-Ni1-N3   | 89.99(13)  | N1-Ni1-N3   | 91.19(14)  |
| O8-Ni1-O9   | 87.81(12)  | N1-Ni1-O9   | 89.04(13)  |
| N3-Ni1-O9   | 177.79(13) | O8-Ni1-O10  | 166.24(11) |
| N1-Ni1-O10  | 102.29(12) | N3-Ni1-O10  | 93.22(12)  |
| O9-Ni1-O10  | 88.88(11)  | O8-Ni1-O3   | 90.77(11)  |
| N1-Ni1-O3   | 175.39(13) | N3-Ni1-O3   | 93.06(12)  |
| O9-Ni1-O3   | 86.78(12)  | O10-Ni1-O3  | 75.71(10)  |
| O10-P1-O11  | 110.64(16) | O10-P1-O12  | 108.49(16) |
| O11-P1-O12  | 110.00(15) | O10-P1-C11  | 110.76(17) |
| O11-P1-C11  | 110.10(18) | O12-P1-C11  | 106.76(17) |
| Mo1-O1-Mo1  | 149.9(2)   | Mo1-O3-Ni1  | 112.80(14) |
| Mo2-O4-Mo1  | 121.88(13) | Mo3-O6-Mo2  | 123.73(14) |
| Mo2-O8-Ni1  | 162.15(17) | Ni1-O9-H9C  | 124.(3)    |
| Ni1-O9-H9D  | 117.(3)    | H9C-O9-H9D  | 106.(5)    |
| P1-O10-Ni1  | 149.36(17) | P1-O10-Mo1  | 116.93(14) |
| Ni1-O10-Mo1 | 92.50(10)  | P1-O11-Mo3  | 126.98(15) |
| P1-O11-Mo2  | 129.44(15) | Mo3-O11-Mo2 | 89.16(9)   |
| P1-O12-Mo2  | 126.37(16) | P1-O12-Mo1  | 136.94(16) |
| Mo2-O12-Mo1 | 96.12(10)  | C5-N1-C1    | 116.8(4)   |

|             |          |               |          |
|-------------|----------|---------------|----------|
| C5-N1-Ni1   | 122.5(3) | C1-N1-Ni1     | 120.0(3) |
| C6-N2-C5    | 131.6(4) | C6-N2-H2'     | 113.(3)  |
| C5-N2-H2'   | 110.(3)  | C6-N3-C10     | 117.7(4) |
| C6-N3-Ni1   | 122.5(3) | C10-N3-Ni1    | 119.7(3) |
| N1-C1-C2    | 123.6(4) | N1-C1-H1      | 118.2    |
| C2-C1-H1    | 118.2    | C1-C2-C3      | 118.8(4) |
| C1-C2-H2    | 120.6    | C3-C2-H2      | 120.6    |
| C4-C3-C2    | 119.0(4) | C4-C3-H3      | 120.5    |
| C2-C3-H3    | 120.5    | C3-C4-C5      | 119.3(4) |
| C3-C4-H4    | 120.3    | C5-C4-H4      | 120.3    |
| N1-C5-N2    | 120.8(4) | N1-C5-C4      | 122.3(4) |
| N2-C5-C4    | 116.9(4) | N3-C6-N2      | 121.4(4) |
| N3-C6-C7    | 121.6(4) | N2-C6-C7      | 117.0(4) |
| C8-C7-C6    | 119.1(4) | C8-C7-H7      | 120.4    |
| C6-C7-H7    | 120.4    | C7-C8-C9      | 119.7(4) |
| C7-C8-H8    | 120.2    | C9-C8-H8      | 120.2    |
| C10-C9-C8   | 118.2(4) | C10-C9-H9     | 120.9    |
| C8-C9-H9    | 120.9    | N3-C10-C9     | 123.7(4) |
| N3-C10-H10  | 118.1    | C9-C10-H10    | 118.1    |
| C12-C11-P1  | 117.9(3) | C12-C11-H11A  | 107.8    |
| P1-C11-H11A | 107.8    | C12-C11-H11B  | 107.8    |
| P1-C11-H11B | 107.8    | H11A-C11-H11B | 107.2    |

|             |          |             |          |
|-------------|----------|-------------|----------|
| C13-C12-C14 | 116.5(4) | C13-C12-C11 | 120.3(4) |
| C14-C12-C11 | 123.1(3) | C12-C13-C14 | 122.0(4) |
| C12-C13-H13 | 119.0    | C14-C13-H13 | 119.0    |
| C13-C14-C12 | 121.5(4) | C13-C14-H14 | 119.2    |
| C12-C14-H14 | 119.2    |             |          |

**Table S84.** Torsion angles (°) for [ $\{\text{Ni}(2,2'\text{-dpa})(\text{H}_2\text{O})\}_2\text{Mo}_5\text{O}_{15}(1,4\text{-O}_3\text{PC}_8\text{H}_8\text{PO}_3)\cdot 2\text{H}_2\text{O}$  (**11** $\cdot 2\text{H}_2\text{O}$ ).

|                |             |                |             |
|----------------|-------------|----------------|-------------|
| O2-Mo1-O3-Ni1  | -167.65(14) | O1-Mo1-O3-Ni1  | 87.59(15)   |
| O4-Mo1-O3-Ni1  | -63.57(15)  | O12-Mo1-O3-Ni1 | -20.4(5)    |
| O10-Mo1-O3-Ni1 | 11.63(12)   | O5-Mo2-O8-Ni1  | -32.5(6)    |
| O6-Mo2-O8-Ni1  | 65.7(6)     | O4-Mo2-O8-Ni1  | -135.1(6)   |
| O12-Mo2-O8-Ni1 | 167.1(4)    | O11-Mo2-O8-Ni1 | 138.3(6)    |
| O11-P1-O10-Ni1 | -101.1(3)   | O12-P1-O10-Ni1 | 138.1(3)    |
| C11-P1-O10-Ni1 | 21.3(4)     | O11-P1-O10-Mo1 | 61.41(19)   |
| O12-P1-O10-Mo1 | -59.34(19)  | C11-P1-O10-Mo1 | -176.21(17) |
| O10-P1-O11-Mo3 | -156.07(16) | O12-P1-O11-Mo3 | -36.2(2)    |
| C11-P1-O11-Mo3 | 81.2(2)     | O10-P1-O11-Mo2 | -29.5(2)    |
| O12-P1-O11-Mo2 | 90.3(2)     | C11-P1-O11-Mo2 | -152.27(19) |
| O10-P1-O12-Mo2 | 175.30(16)  | O11-P1-O12-Mo2 | 54.1(2)     |
| C11-P1-O12-Mo2 | -65.3(2)    | O10-P1-O12-Mo1 | 6.1(3)      |
| O11-P1-O12-Mo1 | -115.0(2)   | C11-P1-O12-Mo1 | 125.5(2)    |
| C5-N1-C1-C2    | -1.7(6)     | Ni1-N1-C1-C2   | 169.1(3)    |
| N1-C1-C2-C3    | -1.9(7)     | C1-C2-C3-C4    | 2.1(7)      |
| C2-C3-C4-C5    | 1.1(7)      | C1-N1-C5-N2    | -175.2(4)   |
| Ni1-N1-C5-N2   | 14.3(5)     | C1-N1-C5-C4    | 5.0(6)      |
| Ni1-N1-C5-C4   | -165.5(3)   | C6-N2-C5-N1    | 18.7(7)     |
| C6-N2-C5-C4    | -161.5(4)   | C3-C4-C5-N1    | -4.8(7)     |

|                 |           |                 |           |
|-----------------|-----------|-----------------|-----------|
| C3-C4-C5-N2     | 175.4(4)  | C10-N3-C6-N2    | -179.7(4) |
| Ni1-N3-C6-N2    | -3.7(5)   | C10-N3-C6-C7    | -1.0(6)   |
| Ni1-N3-C6-C7    | 175.0(3)  | C5-N2-C6-N3     | -24.7(7)  |
| C5-N2-C6-C7     | 156.5(4)  | N3-C6-C7-C8     | 2.1(6)    |
| N2-C6-C7-C8     | -179.1(4) | C6-C7-C8-C9     | -1.4(7)   |
| C7-C8-C9-C10    | -0.2(7)   | C6-N3-C10-C9    | -0.7(6)   |
| Ni1-N3-C10-C9   | -176.9(3) | C8-C9-C10-N3    | 1.3(7)    |
| O10-P1-C11-C12  | 55.0(4)   | O11-P1-C11-C12  | 177.7(3)  |
| O12-P1-C11-C12  | -62.9(3)  | P1-C11-C12-C13  | -138.7(3) |
| P1-C11-C12-C14  | 43.5(5)   | C14-C12-C13-C14 | -0.3(7)   |
| C11-C12-C13-C14 | -178.3(4) | C12-C13-C14-C12 | 0.4(7)    |



**Table S85.** Anisotropic atomic displacement parameters ( $\text{\AA}^2$ ) for [ $\{\text{Ni}(2,2'$ -  
 $\text{dpa})(\text{H}_2\text{O})\}_2\text{Mo}_5\text{O}_{15}(1,4\text{-O}_3\text{PC}_8\text{H}_8\text{PO}_3)\cdot 2\text{H}_2\text{O}$  (**11**·2H<sub>2</sub>O).

The anisotropic atomic displacement factor exponent takes the form:  $-2\pi^2 [ h^2 a^{*2} U_{11} + \dots + 2 h k a^* b^* U_{12} ]$

|     | $U_{11}$    | $U_{22}$    | $U_{33}$    | $U_{23}$     | $U_{13}$    | $U_{12}$     |
|-----|-------------|-------------|-------------|--------------|-------------|--------------|
| Mo1 | 0.00614(17) | 0.00815(18) | 0.00789(17) | -0.00136(14) | 0.00072(13) | -0.00053(14) |
| Mo2 | 0.00490(17) | 0.00900(18) | 0.00579(16) | -0.00007(14) | 0.00083(13) | 0.00146(14)  |
| Mo3 | 0.0060(2)   | 0.0076(2)   | 0.0110(2)   | 0            | 0.00035(19) | 0            |
| Ni1 | 0.0073(3)   | 0.0109(3)   | 0.0097(3)   | -0.0013(2)   | 0.0015(2)   | 0.0012(2)    |
| P1  | 0.0053(5)   | 0.0095(5)   | 0.0051(5)   | -0.0001(4)   | 0.0012(4)   | 0.0011(4)    |
| O1  | 0.0059(19)  | 0.009(2)    | 0.012(2)    | 0            | 0.0011(16)  | 0            |
| O2  | 0.0138(15)  | 0.0106(15)  | 0.0116(14)  | -0.0042(12)  | 0.0015(12)  | -0.0017(12)  |
| O3  | 0.0087(14)  | 0.0121(15)  | 0.0123(14)  | 0.0003(12)   | 0.0022(12)  | -0.0010(12)  |
| O4  | 0.0043(13)  | 0.0089(14)  | 0.0099(14)  | 0.0003(11)   | 0.0004(11)  | -0.0009(11)  |
| O5  | 0.0135(15)  | 0.0170(16)  | 0.0053(13)  | -0.0010(12)  | -0.0004(11) | -0.0003(13)  |
| O6  | 0.0077(14)  | 0.0088(14)  | 0.0100(14)  | 0.0027(11)   | 0.0014(11)  | 0.0006(11)   |
| O7  | 0.0102(15)  | 0.0124(15)  | 0.0211(16)  | 0.0051(13)   | -0.0002(13) | -0.0019(12)  |
| O8  | 0.0084(14)  | 0.0127(15)  | 0.0127(14)  | -0.0026(12)  | 0.0036(12)  | 0.0021(12)   |
| O9  | 0.0090(15)  | 0.0223(17)  | 0.0148(16)  | -0.0052(13)  | 0.0033(13)  | 0.0008(14)   |
| O10 | 0.0055(13)  | 0.0099(14)  | 0.0072(13)  | 0.0008(11)   | 0.0003(11)  | 0.0020(11)   |
| O11 | 0.0070(14)  | 0.0081(14)  | 0.0106(14)  | 0.0017(11)   | 0.0042(11)  | 0.0008(11)   |
| O12 | 0.0058(13)  | 0.0099(14)  | 0.0082(13)  | 0.0004(11)   | 0.0012(11)  | 0.0011(11)   |
| O90 | 0.296(18)   | 0.34(2)     | 0.272(17)   | -0.111(16)   | 0.050(14)   | -0.054(16)   |

|     | <b>U<sub>11</sub></b> | <b>U<sub>22</sub></b> | <b>U<sub>33</sub></b> | <b>U<sub>23</sub></b> | <b>U<sub>13</sub></b> | <b>U<sub>12</sub></b> |
|-----|-----------------------|-----------------------|-----------------------|-----------------------|-----------------------|-----------------------|
| N1  | 0.0076(17)            | 0.0124(18)            | 0.0114(17)            | -0.0011(14)           | -0.0003(14)           | 0.0017(14)            |
| N2  | 0.0167(19)            | 0.0132(19)            | 0.0092(17)            | -0.0025(15)           | 0.0034(15)            | 0.0003(15)            |
| N3  | 0.0100(17)            | 0.0124(18)            | 0.0148(18)            | -0.0036(15)           | 0.0013(14)            | 0.0020(14)            |
| C1  | 0.010(2)              | 0.017(2)              | 0.017(2)              | -0.0015(18)           | -0.0021(17)           | 0.0002(18)            |
| C2  | 0.017(2)              | 0.019(2)              | 0.020(2)              | -0.0021(19)           | 0.0012(19)            | -0.0081(19)           |
| C3  | 0.016(2)              | 0.026(3)              | 0.018(2)              | 0.003(2)              | 0.0074(19)            | -0.002(2)             |
| C4  | 0.016(2)              | 0.020(2)              | 0.012(2)              | -0.0034(18)           | 0.0044(18)            | 0.0012(19)            |
| C5  | 0.007(2)              | 0.012(2)              | 0.014(2)              | 0.0012(17)            | -0.0013(16)           | 0.0016(16)            |
| C6  | 0.009(2)              | 0.009(2)              | 0.015(2)              | 0.0032(16)            | -0.0013(17)           | 0.0045(16)            |
| C7  | 0.015(2)              | 0.013(2)              | 0.015(2)              | -0.0001(17)           | 0.0043(18)            | 0.0029(17)            |
| C8  | 0.015(2)              | 0.009(2)              | 0.027(2)              | -0.0071(19)           | 0.0012(19)            | -0.0006(18)           |
| C9  | 0.013(2)              | 0.019(2)              | 0.025(2)              | -0.002(2)             | 0.0059(19)            | -0.0029(18)           |
| C10 | 0.014(2)              | 0.015(2)              | 0.020(2)              | -0.0008(18)           | 0.0034(18)            | -0.0009(18)           |
| C11 | 0.012(2)              | 0.013(2)              | 0.0067(18)            | 0.0034(16)            | 0.0025(16)            | 0.0019(17)            |
| C12 | 0.012(2)              | 0.016(2)              | 0.0057(18)            | 0.0018(16)            | 0.0005(16)            | 0.0052(18)            |
| C13 | 0.008(2)              | 0.013(2)              | 0.0105(19)            | 0.0030(17)            | -0.0008(16)           | 0.0003(17)            |
| C14 | 0.014(2)              | 0.016(2)              | 0.007(2)              | -0.0003(16)           | 0.0051(17)            | 0.0040(18)            |

**Table S86.** Hydrogen atomic coordinates and isotropic atomic displacement parameters ( $\text{\AA}^2$ ) for  $[\{\text{Ni}(2,2'\text{-dpa})(\text{H}_2\text{O})\}_2\text{Mo}_5\text{O}_{15}(1,4\text{-O}_3\text{PC}_8\text{H}_8\text{PO}_3)]\cdot 2\text{H}_2\text{O}$  (**11** $\cdot 2\text{H}_2\text{O}$ ).

|      | <b>x/a</b> | <b>y/b</b> | <b>z/c</b> | <b>U(eq)</b> |
|------|------------|------------|------------|--------------|
| H9C  | 0.3190(12) | 0.999(4)   | 0.747(2)   | 0.018        |
| H9D  | 0.259(3)   | 1.030(4)   | 0.7707(14) | 0.018        |
| H2'  | 0.177(3)   | 0.805(4)   | 0.5018(11) | 0.016        |
| H1   | 0.2567     | 1.1353     | 0.6513     | 0.019        |
| H2   | 0.3106     | 1.2232     | 0.5778     | 0.023        |
| H3   | 0.3137     | 1.1188     | 0.4873     | 0.023        |
| H4   | 0.2560     | 0.9336     | 0.4726     | 0.019        |
| H7   | 0.0814     | 0.6691     | 0.4879     | 0.017        |
| H8   | -0.0177    | 0.5763     | 0.5254     | 0.021        |
| H9   | -0.0314    | 0.6187     | 0.6250     | 0.023        |
| H10  | 0.0543     | 0.7514     | 0.6838     | 0.019        |
| H11A | 0.0100     | 1.2358     | 0.5938     | 0.012        |
| H11B | 0.0999     | 1.1970     | 0.6025     | 0.012        |
| H13  | 0.1066     | 1.1260     | 0.5053     | 0.013        |
| H14  | 0.0710     | 0.9970     | 0.4235     | 0.014        |

**Table S87.** Sample and crystal data for [ $\{\text{Cu}(\text{o-phen})\}_2\text{Mo}_2\text{F}_3\text{O}_4(\text{OH})(\text{H}_2\text{O})_4(1,3\text{-O}_3\text{PC}_8\text{H}_8\text{PO}_3)\}\cdot\text{H}_2\text{O}$  (**12** $\cdot\text{H}_2\text{O}$ ).

|                        |                                                                                                                                                                               |                            |
|------------------------|-------------------------------------------------------------------------------------------------------------------------------------------------------------------------------|----------------------------|
| Identification code    | [ $\{\text{Cu}(\text{o-phen})\}_2\text{Mo}_2\text{F}_3\text{O}_4(\text{OH})(\text{H}_2\text{O})_4(1,3\text{-O}_3\text{PC}_8\text{H}_8\text{PO}_3)\}\cdot\text{H}_2\text{O}$ ] |                            |
| Chemical formula       | $\text{C}_{32}\text{H}_{35}\text{Cu}_2\text{F}_3\text{Mo}_2\text{N}_4\text{O}_{16}\text{P}_2$                                                                                 |                            |
| Formula weight         | 1169.54                                                                                                                                                                       |                            |
| Temperature            | 90(2) K                                                                                                                                                                       |                            |
| Wavelength             | 0.71073 Å                                                                                                                                                                     |                            |
| Crystal size           | 0.095 x 0.137 x 0.206 mm                                                                                                                                                      |                            |
| Crystal system         | Triclinic                                                                                                                                                                     |                            |
| Space group            | P -1                                                                                                                                                                          |                            |
| Unit cell dimensions   | $a = 10.9305(12)$ Å                                                                                                                                                           | $\alpha = 85.669(2)^\circ$ |
|                        | $b = 12.2497(14)$ Å                                                                                                                                                           | $\beta = 76.269(2)^\circ$  |
|                        | $c = 16.2618(18)$ Å                                                                                                                                                           | $\gamma = 66.823(2)^\circ$ |
| Volume                 | $1944.1(4)$ Å <sup>3</sup>                                                                                                                                                    |                            |
| Z                      | 2                                                                                                                                                                             |                            |
| Density (calculated)   | $1.998$ g/cm <sup>3</sup>                                                                                                                                                     |                            |
| Absorption coefficient | $1.885$ mm <sup>-1</sup>                                                                                                                                                      |                            |
| F(000)                 | 1164                                                                                                                                                                          |                            |

**Table S88.** Data collection and structure refinement for [ $\{\text{Cu}(\text{o-phen})\}_2\text{Mo}_2\text{F}_3\text{O}_4(\text{OH})(\text{H}_2\text{O})_4(1,3\text{-O}_3\text{PC}_8\text{H}_8\text{PO}_3)]\cdot\text{H}_2\text{O}$  (**12**·H<sub>2</sub>O).

|                                     |                                                                                                              |
|-------------------------------------|--------------------------------------------------------------------------------------------------------------|
| Theta range for data collection     | 2.08 to 28.08°                                                                                               |
| Index ranges                        | -14≤h≤14, -16≤k≤16, -21≤l≤21                                                                                 |
| Reflections collected               | 23327                                                                                                        |
| Independent reflections             | 9391 [R(int) = 0.0364]                                                                                       |
| Coverage of independent reflections | 99.3%                                                                                                        |
| Max. and min. transmission          | 0.8410 and 0.6970                                                                                            |
| Refinement method                   | Full-matrix least-squares on F <sup>2</sup>                                                                  |
| Refinement program                  | SHELXL-2013 (Sheldrick, 2013)                                                                                |
| Function minimized                  | $\Sigma w(F_o^2 - F_c^2)^2$                                                                                  |
| Data / restraints / parameters      | 9391 / 15 / 580                                                                                              |
| Goodness-of-fit on F <sup>2</sup>   | 1.047                                                                                                        |
| $\Delta/\sigma_{\text{max}}$        | 0.010                                                                                                        |
| Final R indices                     | 7374 data; I>2σ(I)      R1 = 0.0411, wR2 = 0.1162<br>all data                      R1 = 0.0582, wR2 = 0.1279 |
| Weighting scheme                    | $w=1/[\sigma^2(F_o^2)+(0.0829P)^2]$<br>where $P=(F_o^2+2F_c^2)/3$                                            |
| Largest diff. peak and hole         | 1.052 and -1.237 eÅ <sup>-3</sup>                                                                            |
| R.M.S. deviation from mean          | 0.167 eÅ <sup>-3</sup>                                                                                       |

**Table S89.** Atomic coordinates and equivalent isotropic atomic displacement parameters ( $\text{\AA}^2$ ) for  $[\{\text{Cu}(\text{o-phen})\}_2\text{Mo}_2\text{F}_3\text{O}_4(\text{OH})(\text{H}_2\text{O})_4(1,3\text{-O}_3\text{PC}_8\text{H}_8\text{PO}_3)]\cdot\text{H}_2\text{O}$  (**12**· $\text{H}_2\text{O}$ ).

$U(\text{eq})$  is defined as one third of the trace of the orthogonalized  $U_{ij}$  tensor.

|     | <b>x/a</b> | <b>y/b</b>  | <b>z/c</b>  | <b>U(eq)</b> |
|-----|------------|-------------|-------------|--------------|
| Mo1 | 0.56915(3) | 0.20034(3)  | 0.92401(2)  | 0.01328(9)   |
| Mo2 | 0.81760(3) | 0.78912(3)  | 0.52914(2)  | 0.01975(10)  |
| Cu1 | 0.55088(4) | 0.20194(4)  | 0.68758(3)  | 0.01354(11)  |
| Cu2 | 0.83247(4) | 0.79359(4)  | 0.79035(3)  | 0.01228(11)  |
| P1  | 0.81963(9) | 0.05493(8)  | 0.75925(6)  | 0.01085(18)  |
| P2  | 0.57877(9) | 0.93440(8)  | 0.70170(6)  | 0.01169(18)  |
| F1  | 0.5921(2)  | 0.06330(19) | 0.00239(13) | 0.0165(4)    |
| F2  | 0.3975(2)  | 0.2772(2)   | 0.00332(14) | 0.0221(5)    |
| F3  | 0.8090(3)  | 0.9307(2)   | 0.46181(16) | 0.0336(6)    |
| O1  | 0.4440(3)  | 0.1076(2)   | 0.89138(16) | 0.0156(5)    |
| O2  | 0.7325(3)  | 0.0764(2)   | 0.85061(16) | 0.0158(5)    |
| O3  | 0.7393(3)  | 0.1199(2)   | 0.69391(16) | 0.0149(5)    |
| O4  | 0.8920(3)  | 0.9217(2)   | 0.74142(16) | 0.0131(5)    |
| O5  | 0.5010(3)  | 0.0668(2)   | 0.72511(15) | 0.0133(5)    |
| O6  | 0.5658(4)  | 0.1538(3)   | 0.5410(2)   | 0.0401(8)    |
| O7  | 0.6505(3)  | 0.8652(2)   | 0.76879(16) | 0.0152(5)    |
| O8  | 0.6741(3)  | 0.9203(2)   | 0.61336(16) | 0.0171(5)    |
| O9  | 0.9569(3)  | 0.8438(3)   | 0.5801(2)   | 0.0303(7)    |

|     | <b>x/a</b> | <b>y/b</b> | <b>z/c</b>  | <b>U(eq)</b> |
|-----|------------|------------|-------------|--------------|
| O10 | 0.7748(3)  | 0.8399(2)  | 0.92871(17) | 0.0178(5)    |
| O11 | 0.8313(3)  | 0.6869(3)  | 0.6155(2)   | 0.0341(8)    |
| O12 | 0.7006(3)  | 0.7630(3)  | 0.4891(2)   | 0.0340(7)    |
| O13 | 0.5264(3)  | 0.2878(2)  | 0.83976(17) | 0.0215(6)    |
| O14 | 0.6561(3)  | 0.2608(3)  | 0.96553(18) | 0.0258(6)    |
| O15 | 0.9746(3)  | 0.7043(3)  | 0.4560(2)   | 0.0365(8)    |
| O90 | 0.8489(5)  | 0.1122(4)  | 0.5165(2)   | 0.0507(10)   |
| N1  | 0.3580(3)  | 0.3062(3)  | 0.68511(19) | 0.0158(6)    |
| N2  | 0.5824(3)  | 0.3506(3)  | 0.64874(19) | 0.0155(6)    |
| N3  | 0.0220(3)  | 0.6960(3)  | 0.81000(19) | 0.0150(6)    |
| N4  | 0.8096(3)  | 0.6385(3)  | 0.8216(2)   | 0.0156(6)    |
| C1  | 0.2489(4)  | 0.2787(4)  | 0.7032(2)   | 0.0187(8)    |
| C2  | 0.1208(4)  | 0.3595(4)  | 0.6887(3)   | 0.0220(8)    |
| C3  | 0.1104(4)  | 0.4675(4)  | 0.6551(3)   | 0.0242(9)    |
| C4  | 0.2243(4)  | 0.4992(4)  | 0.6364(2)   | 0.0215(8)    |
| C5  | 0.3467(4)  | 0.4143(3)  | 0.6526(2)   | 0.0167(7)    |
| C6  | 0.2233(5)  | 0.6104(4)  | 0.6026(3)   | 0.0269(9)    |
| C7  | 0.3384(5)  | 0.6355(3)  | 0.5871(3)   | 0.0252(9)    |
| C8  | 0.4645(4)  | 0.5502(3)  | 0.6033(2)   | 0.0211(8)    |
| C9  | 0.4672(4)  | 0.4393(3)  | 0.6344(2)   | 0.0152(7)    |
| C10 | 0.5860(5)  | 0.5684(4)  | 0.5887(3)   | 0.0248(9)    |

|     | <b>x/a</b> | <b>y/b</b> | <b>z/c</b> | <b>U(eq)</b> |
|-----|------------|------------|------------|--------------|
| C11 | 0.7025(4)  | 0.4788(4)  | 0.6045(3)  | 0.0234(8)    |
| C12 | 0.6977(4)  | 0.3704(3)  | 0.6333(2)  | 0.0198(8)    |
| C13 | 0.1263(4)  | 0.7282(3)  | 0.8033(3)  | 0.0195(8)    |
| C14 | 0.2457(4)  | 0.6547(4)  | 0.8300(3)  | 0.0270(9)    |
| C15 | 0.2558(4)  | 0.5473(4)  | 0.8649(3)  | 0.0249(9)    |
| C16 | 0.1450(4)  | 0.5114(3)  | 0.8743(2)  | 0.0192(8)    |
| C17 | 0.0307(4)  | 0.5901(3)  | 0.8456(2)  | 0.0154(7)    |
| C18 | 0.1440(5)  | 0.4009(4)  | 0.9102(3)  | 0.0268(9)    |
| C19 | 0.0346(5)  | 0.3733(3)  | 0.9169(3)  | 0.0253(9)    |
| C20 | 0.9161(4)  | 0.4510(3)  | 0.8872(2)  | 0.0217(8)    |
| C21 | 0.9158(4)  | 0.5594(3)  | 0.8519(2)  | 0.0161(7)    |
| C22 | 0.8009(5)  | 0.4252(4)  | 0.8893(3)  | 0.0266(9)    |
| C23 | 0.6959(4)  | 0.5053(4)  | 0.8565(3)  | 0.0283(10)   |
| C24 | 0.7027(4)  | 0.6115(4)  | 0.8240(3)  | 0.0207(8)    |
| C25 | 0.4512(4)  | 0.8782(3)  | 0.6924(2)  | 0.0157(7)    |
| C26 | 0.3162(4)  | 0.9296(3)  | 0.7560(2)  | 0.0141(7)    |
| C27 | 0.3063(4)  | 0.9161(4)  | 0.8429(2)  | 0.0182(7)    |
| C28 | 0.1978(4)  | 0.9954(3)  | 0.7276(2)  | 0.0141(7)    |
| C29 | 0.1815(4)  | 0.9679(4)  | 0.8993(2)  | 0.0213(8)    |
| C30 | 0.0705(4)  | 0.0481(3)  | 0.7844(2)  | 0.0137(7)    |
| C31 | 0.0638(4)  | 0.0339(4)  | 0.8711(2)  | 0.0210(8)    |



|     | <b>x/a</b> | <b>y/b</b> | <b>z/c</b> | <b>U(eq)</b> |
|-----|------------|------------|------------|--------------|
| C32 | 0.9459(4)  | 0.1189(3)  | 0.7502(2)  | 0.0153(7)    |

**Table S90.** Bond lengths (Å) for [ $\{\text{Cu}(\text{o-phen})\}_2\text{Mo}_2\text{F}_3\text{O}_4(\text{OH})(\text{H}_2\text{O})_4(1,3\text{-O}_3\text{PC}_8\text{H}_8\text{PO}_3)\} \cdot \text{H}_2\text{O}$  (**12**·H<sub>2</sub>O).

|          |           |          |           |
|----------|-----------|----------|-----------|
| Mo1-O14  | 1.686(3)  | Mo1-O13  | 1.712(3)  |
| Mo1-F2   | 1.927(2)  | Mo1-F1   | 2.001(2)  |
| Mo1-O2   | 2.011(3)  | Mo1-O1   | 2.259(3)  |
| Mo2-O12  | 1.706(3)  | Mo2-O11  | 1.802(3)  |
| Mo2-O15  | 1.804(3)  | Mo2-F3   | 1.962(3)  |
| Mo2-O8   | 2.061(3)  | Mo2-O9   | 2.222(3)  |
| Cu1-O3   | 1.928(3)  | Cu1-O5   | 1.951(3)  |
| Cu1-N1   | 1.998(3)  | Cu1-N2   | 2.012(3)  |
| Cu1-O6   | 2.450(4)  | Cu2-O7   | 1.939(3)  |
| Cu2-O4   | 1.972(2)  | Cu2-N4   | 2.024(3)  |
| Cu2-N3   | 2.032(3)  | Cu2-O10  | 2.241(3)  |
| P1-O3    | 1.516(2)  | P1-O4    | 1.523(3)  |
| P1-O2    | 1.541(3)  | P1-C32   | 1.810(4)  |
| P2-O7    | 1.505(3)  | P2-O5    | 1.534(3)  |
| P2-O8    | 1.538(3)  | P2-C25   | 1.820(4)  |
| O1-H1C   | 0.830(18) | O1-H1D   | 0.827(18) |
| O6-H6C   | 0.885(19) | O6-H6D   | 0.870(19) |
| O9-H9C   | 0.874(19) | O9-H9D   | 0.868(19) |
| O10-H10C | 0.814(19) | O10-H10D | 0.820(19) |
| O90-H90A | 0.897(19) | O90-H90B | 0.886(19) |

|         |          |         |          |
|---------|----------|---------|----------|
| N1-C1   | 1.325(5) | N1-C5   | 1.358(5) |
| N2-C12  | 1.339(5) | N2-C9   | 1.359(5) |
| N3-C13  | 1.326(5) | N3-C17  | 1.357(5) |
| N4-C24  | 1.327(5) | N4-C21  | 1.358(5) |
| C1-C2   | 1.423(5) | C1-H1   | 0.95     |
| C2-C3   | 1.365(6) | C2-H2   | 0.95     |
| C3-C4   | 1.406(6) | C3-H3   | 0.95     |
| C4-C5   | 1.404(5) | C4-C6   | 1.427(6) |
| C5-C9   | 1.426(5) | C6-C7   | 1.372(7) |
| C6-H6   | 0.95     | C7-C8   | 1.434(6) |
| C7-H7   | 0.95     | C8-C10  | 1.395(6) |
| C8-C9   | 1.405(5) | C10-C11 | 1.381(6) |
| C10-H10 | 0.95     | C11-C12 | 1.390(5) |
| C11-H11 | 0.95     | C12-H12 | 0.95     |
| C13-C14 | 1.409(5) | C13-H13 | 0.95     |
| C14-C15 | 1.366(6) | C14-H14 | 0.95     |
| C15-C16 | 1.416(6) | C15-H15 | 0.95     |
| C16-C17 | 1.403(5) | C16-C18 | 1.435(5) |
| C17-C21 | 1.426(5) | C18-C19 | 1.344(6) |
| C18-H18 | 0.95     | C19-C20 | 1.441(6) |
| C19-H19 | 0.95     | C20-C21 | 1.404(5) |
| C20-C22 | 1.405(6) | C22-C23 | 1.376(6) |

|          |          |          |          |
|----------|----------|----------|----------|
| C22-H22  | 0.95     | C23-C24  | 1.389(6) |
| C23-H23  | 0.95     | C24-H24  | 0.95     |
| C25-C26  | 1.513(5) | C25-H25A | 0.99     |
| C25-H25B | 0.99     | C26-C27  | 1.393(5) |
| C26-C28  | 1.395(5) | C27-C29  | 1.385(5) |
| C27-H27  | 0.95     | C28-C30  | 1.407(5) |
| C28-H28  | 0.95     | C29-C31  | 1.388(6) |
| C29-H29  | 0.95     | C30-C31  | 1.396(5) |
| C30-C32  | 1.507(5) | C31-H31  | 0.95     |
| C32-C30  | 1.507(5) | C32-H32A | 0.99     |
| C32-H32B | 0.99     |          |          |

**Table S91.** Bond angles (°) for [ $\{\text{Cu}(\text{o-phen})\}_2\text{Mo}_2\text{F}_3\text{O}_4(\text{OH})(\text{H}_2\text{O})_4(1,3\text{-O}_3\text{PC}_8\text{H}_8\text{PO}_3)]\cdot\text{H}_2\text{O}$  (**12**·H<sub>2</sub>O).

|             |            |             |            |
|-------------|------------|-------------|------------|
| O14-Mo1-O13 | 104.37(14) | O14-Mo1-F2  | 95.29(12)  |
| O13-Mo1-F2  | 96.48(12)  | O14-Mo1-F1  | 96.55(12)  |
| O13-Mo1-F1  | 158.83(12) | F2-Mo1-F1   | 84.62(9)   |
| O14-Mo1-O2  | 96.92(13)  | O13-Mo1-O2  | 93.02(12)  |
| F2-Mo1-O2   | 162.17(10) | F1-Mo1-O2   | 81.13(10)  |
| O14-Mo1-O1  | 169.99(12) | O13-Mo1-O1  | 84.69(12)  |
| F2-Mo1-O1   | 79.22(10)  | F1-Mo1-O1   | 74.72(9)   |
| O2-Mo1-O1   | 86.70(10)  | O12-Mo2-O11 | 99.67(17)  |
| O12-Mo2-O15 | 101.35(15) | O11-Mo2-O15 | 98.62(16)  |
| O12-Mo2-F3  | 95.06(14)  | O11-Mo2-F3  | 161.67(14) |
| O15-Mo2-F3  | 89.03(15)  | O12-Mo2-O8  | 94.86(13)  |
| O11-Mo2-O8  | 88.29(13)  | O15-Mo2-O8  | 160.98(14) |
| F3-Mo2-O8   | 79.61(11)  | O12-Mo2-O9  | 173.86(14) |
| O11-Mo2-O9  | 84.63(14)  | O15-Mo2-O9  | 82.21(13)  |
| F3-Mo2-O9   | 79.91(12)  | O8-Mo2-O9   | 80.82(11)  |
| O3-Cu1-O5   | 94.52(10)  | O3-Cu1-N1   | 172.48(12) |
| O5-Cu1-N1   | 91.85(12)  | O3-Cu1-N2   | 91.24(12)  |
| O5-Cu1-N2   | 174.23(12) | N1-Cu1-N2   | 82.38(13)  |
| O3-Cu1-O6   | 100.30(12) | O5-Cu1-O6   | 89.34(11)  |
| N1-Cu1-O6   | 83.74(13)  | N2-Cu1-O6   | 89.92(12)  |

|               |            |               |            |
|---------------|------------|---------------|------------|
| O7-Cu2-O4     | 96.23(10)  | O7-Cu2-N4     | 91.22(12)  |
| O4-Cu2-N4     | 166.98(12) | O7-Cu2-N3     | 171.82(12) |
| O4-Cu2-N3     | 90.60(11)  | N4-Cu2-N3     | 81.25(12)  |
| O7-Cu2-O10    | 97.59(10)  | O4-Cu2-O10    | 101.16(10) |
| N4-Cu2-O10    | 88.38(11)  | N3-Cu2-O10    | 85.44(11)  |
| O3-P1-O4      | 112.92(15) | O3-P1-O2      | 113.28(14) |
| O4-P1-O2      | 109.00(14) | O3-P1-C32     | 103.91(16) |
| O4-P1-C32     | 109.23(16) | O2-P1-C32     | 108.25(16) |
| O7-P2-O5      | 112.43(15) | O7-P2-O8      | 113.55(15) |
| O5-P2-O8      | 109.46(14) | O7-P2-C25     | 108.25(16) |
| O5-P2-C25     | 106.30(16) | O8-P2-C25     | 106.40(16) |
| Mo1-O1-H1C    | 109.(3)    | Mo1-O1-H1D    | 114.(3)    |
| H1C-O1-H1D    | 106.(3)    | P1-O2-Mo1     | 141.17(16) |
| P1-O3-Cu1     | 138.20(16) | P1-O4-Cu2     | 128.65(15) |
| P2-O5-Cu1     | 130.12(15) | Cu1-O6-H6C    | 97.(4)     |
| Cu1-O6-H6D    | 112.(4)    | H6C-O6-H6D    | 106.(4)    |
| P2-O7-Cu2     | 140.01(16) | P2-O8-Mo2     | 140.11(16) |
| Mo2-O9-H9C    | 98.(4)     | Mo2-O9-H9D    | 117.(4)    |
| H9C-O9-H9D    | 95.(3)     | Cu2-O10-H10C  | 102.(3)    |
| Cu2-O10-H10D  | 111.(3)    | H10C-O10-H10D | 108.(4)    |
| H90A-O90-H90B | 98.(4)     | C1-N1-C5      | 119.1(3)   |
| C1-N1-Cu1     | 128.5(3)   | C5-N1-Cu1     | 112.1(2)   |

|             |          |             |          |
|-------------|----------|-------------|----------|
| C12-N2-C9   | 118.4(3) | C12-N2-Cu1  | 129.6(3) |
| C9-N2-Cu1   | 112.0(2) | C13-N3-C17  | 118.3(3) |
| C13-N3-Cu2  | 128.9(3) | C17-N3-Cu2  | 112.1(2) |
| C24-N4-C21  | 118.6(3) | C24-N4-Cu2  | 128.9(3) |
| C21-N4-Cu2  | 112.1(2) | N1-C1-C2    | 121.5(4) |
| N1-C1-H1    | 119.3    | C2-C1-H1    | 119.3    |
| C3-C2-C1    | 119.2(4) | C3-C2-H2    | 120.4    |
| C1-C2-H2    | 120.4    | C2-C3-C4    | 120.4(4) |
| C2-C3-H3    | 119.8    | C4-C3-H3    | 119.8    |
| C5-C4-C3    | 116.8(4) | C5-C4-C6    | 118.6(4) |
| C3-C4-C6    | 124.6(4) | N1-C5-C4    | 123.1(4) |
| N1-C5-C9    | 116.8(3) | C4-C5-C9    | 120.1(3) |
| C7-C6-C4    | 121.2(4) | C7-C6-H6    | 119.4    |
| C4-C6-H6    | 119.4    | C6-C7-C8    | 121.1(4) |
| C6-C7-H7    | 119.4    | C8-C7-H7    | 119.4    |
| C10-C8-C9   | 117.4(4) | C10-C8-C7   | 124.7(4) |
| C9-C8-C7    | 117.9(4) | N2-C9-C8    | 122.7(4) |
| N2-C9-C5    | 116.3(3) | C8-C9-C5    | 120.9(3) |
| C11-C10-C8  | 119.8(4) | C11-C10-H10 | 120.1    |
| C8-C10-H10  | 120.1    | C10-C11-C12 | 119.4(4) |
| C10-C11-H11 | 120.3    | C12-C11-H11 | 120.3    |
| N2-C12-C11  | 122.2(4) | N2-C12-H12  | 118.9    |

|               |          |             |          |
|---------------|----------|-------------|----------|
| C11-C12-H12   | 118.9    | N3-C13-C14  | 121.9(4) |
| N3-C13-H13    | 119.1    | C14-C13-H13 | 119.1    |
| C15-C14-C13   | 120.1(4) | C15-C14-H14 | 120.0    |
| C13-C14-H14   | 120.0    | C14-C15-C16 | 119.3(4) |
| C14-C15-H15   | 120.3    | C16-C15-H15 | 120.3    |
| C17-C16-C15   | 116.6(3) | C17-C16-C18 | 119.2(4) |
| C15-C16-C18   | 124.2(4) | N3-C17-C16  | 123.8(3) |
| N3-C17-C21    | 116.3(3) | C16-C17-C21 | 119.8(3) |
| C19-C18-C16   | 120.5(4) | C19-C18-H18 | 119.7    |
| C16-C18-H18   | 119.7    | C18-C19-C20 | 121.9(4) |
| C18-C19-H19   | 119.1    | C20-C19-H19 | 119.1    |
| C21-C20-C22   | 117.3(4) | C21-C20-C19 | 118.1(4) |
| C22-C20-C19   | 124.6(4) | N4-C21-C20  | 122.8(4) |
| N4-C21-C17    | 116.8(3) | C20-C21-C17 | 120.4(3) |
| C23-C22-C20   | 119.0(4) | C23-C22-H22 | 120.5    |
| C20-C22-H22   | 120.5    | C22-C23-C24 | 120.1(4) |
| C22-C23-H23   | 120.0    | C24-C23-H23 | 120.0    |
| N4-C24-C23    | 122.2(4) | N4-C24-H24  | 118.9    |
| C23-C24-H24   | 118.9    | C26-C25-P2  | 115.2(2) |
| C26-C25-H25A  | 108.5    | P2-C25-H25A | 108.5    |
| C26-C25-H25B  | 108.5    | P2-C25-H25B | 108.5    |
| H25A-C25-H25B | 107.5    | C27-C26-C28 | 118.5(3) |



|               |          |             |          |
|---------------|----------|-------------|----------|
| C27-C26-C25   | 122.1(3) | C28-C26-C25 | 119.4(3) |
| C29-C27-C26   | 120.4(3) | C29-C27-H27 | 119.8    |
| C26-C27-H27   | 119.8    | C26-C28-C30 | 121.5(3) |
| C26-C28-H28   | 119.2    | C30-C28-H28 | 119.2    |
| C27-C29-C31   | 121.1(3) | C27-C29-H29 | 119.4    |
| C31-C29-H29   | 119.4    | C31-C30-C28 | 118.7(3) |
| C31-C30-C32   | 121.9(3) | C28-C30-C32 | 119.3(3) |
| C29-C31-C30   | 119.7(4) | C29-C31-H31 | 120.1    |
| C30-C31-H31   | 120.1    | C30-C32-P1  | 117.2(2) |
| C30-C32-H32A  | 108.0    | P1-C32-H32A | 108.0    |
| C30-C32-H32B  | 108.0    | P1-C32-H32B | 108.0    |
| H32A-C32-H32B | 107.3    |             |          |

**Table S92.** Torsion angles (°) for [ $\{\text{Cu}(\text{o-phen})\}_2\text{Mo}_2\text{F}_3\text{O}_4(\text{OH})(\text{H}_2\text{O})_4(1,3\text{-O}_3\text{PC}_8\text{H}_8\text{PO}_3)\cdot\text{H}_2\text{O}$  (**12**·H<sub>2</sub>O)].

|               |            |               |             |
|---------------|------------|---------------|-------------|
| O3-P1-O2-Mo1  | -30.5(3)   | O4-P1-O2-Mo1  | -157.1(2)   |
| C32-P1-O2-Mo1 | 84.2(3)    | O4-P1-O3-Cu1  | 110.7(2)    |
| O2-P1-O3-Cu1  | -13.8(3)   | C32-P1-O3-Cu1 | -131.0(2)   |
| O3-P1-O4-Cu2  | -97.6(2)   | O2-P1-O4-Cu2  | 29.2(2)     |
| C32-P1-O4-Cu2 | 147.29(19) | O7-P2-O5-Cu1  | 100.7(2)    |
| O8-P2-O5-Cu1  | -26.4(2)   | C25-P2-O5-Cu1 | -140.99(19) |
| O5-P2-O7-Cu2  | -103.8(3)  | O8-P2-O7-Cu2  | 21.2(3)     |
| C25-P2-O7-Cu2 | 139.1(2)   | O7-P2-O8-Mo2  | 51.5(3)     |
| O5-P2-O8-Mo2  | 178.1(2)   | C25-P2-O8-Mo2 | -67.5(3)    |
| C5-N1-C1-C2   | 0.5(5)     | Cu1-N1-C1-C2  | -172.4(3)   |
| N1-C1-C2-C3   | 0.3(6)     | C1-C2-C3-C4   | -1.1(6)     |
| C2-C3-C4-C5   | 1.1(6)     | C2-C3-C4-C6   | -178.8(4)   |
| C1-N1-C5-C4   | -0.5(5)    | Cu1-N1-C5-C4  | 173.5(3)    |
| C1-N1-C5-C9   | 179.9(3)   | Cu1-N1-C5-C9  | -6.1(4)     |
| C3-C4-C5-N1   | -0.3(6)    | C6-C4-C5-N1   | 179.6(3)    |
| C3-C4-C5-C9   | 179.3(3)   | C6-C4-C5-C9   | -0.8(5)     |
| C5-C4-C6-C7   | -0.9(6)    | C3-C4-C6-C7   | 179.0(4)    |
| C4-C6-C7-C8   | 0.8(6)     | C6-C7-C8-C10  | 179.4(4)    |
| C6-C7-C8-C9   | 1.0(6)     | C12-N2-C9-C8  | 0.6(5)      |
| Cu1-N2-C9-C8  | -177.2(3)  | C12-N2-C9-C5  | -179.4(3)   |

|                 |           |                 |           |
|-----------------|-----------|-----------------|-----------|
| Cu1-N2-C9-C5    | 2.8(4)    | C10-C8-C9-N2    | -1.2(5)   |
| C7-C8-C9-N2     | 177.4(3)  | C10-C8-C9-C5    | 178.8(3)  |
| C7-C8-C9-C5     | -2.6(5)   | N1-C5-C9-N2     | 2.2(5)    |
| C4-C5-C9-N2     | -177.4(3) | N1-C5-C9-C8     | -177.8(3) |
| C4-C5-C9-C8     | 2.6(5)    | C9-C8-C10-C11   | 0.2(6)    |
| C7-C8-C10-C11   | -178.3(4) | C8-C10-C11-C12  | 1.3(6)    |
| C9-N2-C12-C11   | 1.0(6)    | Cu1-N2-C12-C11  | 178.4(3)  |
| C10-C11-C12-N2  | -2.0(6)   | C17-N3-C13-C14  | 1.6(6)    |
| Cu2-N3-C13-C14  | 171.4(3)  | N3-C13-C14-C15  | -0.7(7)   |
| C13-C14-C15-C16 | -0.4(7)   | C14-C15-C16-C17 | 0.6(6)    |
| C14-C15-C16-C18 | -179.8(4) | C13-N3-C17-C16  | -1.3(5)   |
| Cu2-N3-C17-C16  | -172.8(3) | C13-N3-C17-C21  | 179.7(3)  |
| Cu2-N3-C17-C21  | 8.2(4)    | C15-C16-C17-N3  | 0.2(6)    |
| C18-C16-C17-N3  | -179.4(4) | C15-C16-C17-C21 | 179.2(3)  |
| C18-C16-C17-C21 | -0.4(6)   | C17-C16-C18-C19 | -0.5(6)   |
| C15-C16-C18-C19 | 180.0(4)  | C16-C18-C19-C20 | 1.3(7)    |
| C18-C19-C20-C21 | -1.3(6)   | C18-C19-C20-C22 | 177.4(4)  |
| C24-N4-C21-C20  | -1.2(5)   | Cu2-N4-C21-C20  | 172.3(3)  |
| C24-N4-C21-C17  | 177.9(3)  | Cu2-N4-C21-C17  | -8.6(4)   |
| C22-C20-C21-N4  | 0.8(6)    | C19-C20-C21-N4  | 179.6(4)  |
| C22-C20-C21-C17 | -178.3(4) | C19-C20-C21-C17 | 0.4(5)    |
| N3-C17-C21-N4   | 0.2(5)    | C16-C17-C21-N4  | -178.9(3) |

|                 |           |                 |           |
|-----------------|-----------|-----------------|-----------|
| N3-C17-C21-C20  | 179.4(3)  | C16-C17-C21-C20 | 0.3(5)    |
| C21-C20-C22-C23 | 0.7(6)    | C19-C20-C22-C23 | -178.0(4) |
| C20-C22-C23-C24 | -1.8(7)   | C21-N4-C24-C23  | 0.1(6)    |
| Cu2-N4-C24-C23  | -172.1(3) | C22-C23-C24-N4  | 1.4(7)    |
| O7-P2-C25-C26   | 83.4(3)   | O5-P2-C25-C26   | -37.6(3)  |
| O8-P2-C25-C26   | -154.2(3) | P2-C25-C26-C27  | -61.2(4)  |
| P2-C25-C26-C28  | 117.1(3)  | C28-C26-C27-C29 | -0.5(6)   |
| C25-C26-C27-C29 | 177.8(3)  | C27-C26-C28-C30 | 0.4(5)    |
| C25-C26-C28-C30 | -178.0(3) | C26-C27-C29-C31 | 0.1(6)    |
| C26-C28-C30-C31 | 0.1(5)    | C26-C28-C30-C32 | 179.6(3)  |
| C27-C29-C31-C30 | 0.4(6)    | C28-C30-C31-C29 | -0.5(6)   |
| C32-C30-C31-C29 | 180.0(4)  | O3-P1-C32-C30   | -160.1(3) |
| O4-P1-C32-C30   | -39.3(3)  | O2-P1-C32-C30   | 79.3(3)   |

**Table S93.** Anisotropic atomic displacement parameters ( $\text{\AA}^2$ ) for [ $\{\text{Cu}(\text{o-phen})\}_2\text{Mo}_2\text{F}_3\text{O}_4(\text{OH})(\text{H}_2\text{O})_4(1,3\text{-O}_3\text{PC}_8\text{H}_8\text{PO}_3)\}\cdot\text{H}_2\text{O}$  (**12**· $\text{H}_2\text{O}$ ).

The anisotropic atomic displacement factor exponent takes the form:  $-2\pi^2 [ h^2 a^{*2} U_{11} + \dots + 2 h k a^* b^* U_{12} ]$

|     | $U_{11}$    | $U_{22}$    | $U_{33}$    | $U_{23}$     | $U_{13}$     | $U_{12}$     |
|-----|-------------|-------------|-------------|--------------|--------------|--------------|
| Mo1 | 0.01154(16) | 0.01372(16) | 0.01369(15) | 0.00074(11)  | 0.00036(12)  | -0.00588(12) |
| Mo2 | 0.01504(18) | 0.02022(18) | 0.02060(18) | -0.00129(13) | -0.00327(13) | -0.00342(14) |
| Cu1 | 0.0080(2)   | 0.0141(2)   | 0.0162(2)   | 0.00527(16)  | -0.00181(17) | -0.00325(17) |
| Cu2 | 0.0087(2)   | 0.0127(2)   | 0.0153(2)   | 0.00317(16)  | -0.00298(16) | -0.00440(17) |
| P1  | 0.0066(4)   | 0.0120(4)   | 0.0128(4)   | 0.0025(3)    | -0.0009(3)   | -0.0035(3)   |
| P2  | 0.0071(4)   | 0.0146(4)   | 0.0115(4)   | -0.0004(3)   | -0.0008(3)   | -0.0029(3)   |
| F1  | 0.0174(11)  | 0.0193(11)  | 0.0155(10)  | 0.0054(8)    | -0.0048(9)   | -0.0103(9)   |
| F2  | 0.0191(12)  | 0.0226(12)  | 0.0191(11)  | -0.0042(9)   | 0.0044(9)    | -0.0067(10)  |
| F3  | 0.0407(16)  | 0.0449(16)  | 0.0229(13)  | 0.0107(11)   | -0.0105(12)  | -0.0246(13)  |
| O1  | 0.0175(13)  | 0.0191(13)  | 0.0111(12)  | 0.0016(10)   | -0.0022(10)  | -0.0090(11)  |
| O2  | 0.0099(12)  | 0.0179(13)  | 0.0150(12)  | 0.0014(10)   | 0.0016(10)   | -0.0031(10)  |
| O3  | 0.0080(12)  | 0.0199(13)  | 0.0140(12)  | 0.0042(10)   | -0.0013(10)  | -0.0039(10)  |
| O4  | 0.0114(12)  | 0.0108(11)  | 0.0173(12)  | 0.0020(9)    | -0.0027(10)  | -0.0051(10)  |
| O5  | 0.0099(12)  | 0.0162(12)  | 0.0114(11)  | -0.0006(9)   | -0.0016(9)   | -0.0030(10)  |
| O6  | 0.041(2)    | 0.0361(19)  | 0.0333(18)  | 0.0027(15)   | -0.0050(17)  | -0.0067(17)  |
| O7  | 0.0096(12)  | 0.0186(13)  | 0.0163(12)  | 0.0032(10)   | -0.0036(10)  | -0.0043(10)  |
| O8  | 0.0136(13)  | 0.0185(13)  | 0.0139(12)  | -0.0005(10)  | 0.0004(10)   | -0.0025(11)  |
| O9  | 0.0224(16)  | 0.0351(17)  | 0.0257(16)  | -0.0058(13)  | -0.0065(13)  | -0.0014(14)  |

|     | <b>U<sub>11</sub></b> | <b>U<sub>22</sub></b> | <b>U<sub>33</sub></b> | <b>U<sub>23</sub></b> | <b>U<sub>13</sub></b> | <b>U<sub>12</sub></b> |
|-----|-----------------------|-----------------------|-----------------------|-----------------------|-----------------------|-----------------------|
| O10 | 0.0157(14)            | 0.0161(13)            | 0.0176(13)            | 0.0017(10)            | 0.0010(11)            | -0.0049(11)           |
| O11 | 0.0342(19)            | 0.0209(15)            | 0.0349(18)            | 0.0066(13)            | -0.0051(15)           | -0.0003(14)           |
| O12 | 0.0308(18)            | 0.0416(19)            | 0.0332(17)            | -0.0104(14)           | 0.0008(14)            | -0.0207(16)           |
| O13 | 0.0181(14)            | 0.0162(13)            | 0.0219(14)            | 0.0078(11)            | 0.0005(11)            | -0.0023(11)           |
| O14 | 0.0291(16)            | 0.0318(16)            | 0.0247(15)            | -0.0035(12)           | 0.0004(13)            | -0.0233(14)           |
| O15 | 0.0142(15)            | 0.058(2)              | 0.0276(16)            | -0.0278(15)           | 0.0017(13)            | -0.0022(15)           |
| O90 | 0.065(3)              | 0.055(2)              | 0.038(2)              | 0.0031(18)            | -0.002(2)             | -0.035(2)             |
| N1  | 0.0125(15)            | 0.0157(15)            | 0.0157(15)            | -0.0006(12)           | -0.0025(12)           | -0.0021(12)           |
| N2  | 0.0145(15)            | 0.0153(15)            | 0.0143(14)            | 0.0028(12)            | -0.0025(12)           | -0.0042(12)           |
| N3  | 0.0126(15)            | 0.0140(14)            | 0.0160(15)            | 0.0008(12)            | -0.0014(12)           | -0.0039(12)           |
| N4  | 0.0134(15)            | 0.0140(14)            | 0.0176(15)            | 0.0001(12)            | -0.0020(12)           | -0.0043(12)           |
| C1  | 0.0117(17)            | 0.0231(19)            | 0.0198(18)            | -0.0044(15)           | -0.0036(15)           | -0.0043(15)           |
| C2  | 0.0119(18)            | 0.029(2)              | 0.0222(19)            | -0.0074(16)           | -0.0026(15)           | -0.0035(16)           |
| C3  | 0.017(2)              | 0.025(2)              | 0.023(2)              | -0.0063(16)           | -0.0063(16)           | 0.0018(16)            |
| C4  | 0.020(2)              | 0.0215(19)            | 0.0159(18)            | -0.0005(14)           | -0.0071(15)           | 0.0010(16)            |
| C5  | 0.0157(18)            | 0.0157(17)            | 0.0139(16)            | -0.0008(13)           | -0.0027(14)           | -0.0012(14)           |
| C6  | 0.029(2)              | 0.020(2)              | 0.020(2)              | 0.0009(15)            | -0.0062(17)           | 0.0030(17)            |
| C7  | 0.029(2)              | 0.0132(18)            | 0.023(2)              | 0.0032(15)            | -0.0037(18)           | 0.0008(16)            |
| C8  | 0.026(2)              | 0.0139(18)            | 0.0159(18)            | -0.0010(14)           | -0.0011(16)           | -0.0023(16)           |
| C9  | 0.0132(17)            | 0.0145(17)            | 0.0120(16)            | -0.0031(13)           | 0.0015(13)            | -0.0012(14)           |
| C10 | 0.033(2)              | 0.0163(18)            | 0.0195(19)            | 0.0006(15)            | 0.0042(17)            | -0.0101(17)           |

|     | <b>U<sub>11</sub></b> | <b>U<sub>22</sub></b> | <b>U<sub>33</sub></b> | <b>U<sub>23</sub></b> | <b>U<sub>13</sub></b> | <b>U<sub>12</sub></b> |
|-----|-----------------------|-----------------------|-----------------------|-----------------------|-----------------------|-----------------------|
| C11 | 0.025(2)              | 0.022(2)              | 0.024(2)              | 0.0002(16)            | 0.0002(17)            | -0.0135(17)           |
| C12 | 0.0177(19)            | 0.0205(19)            | 0.0175(18)            | -0.0004(14)           | -0.0001(15)           | -0.0057(16)           |
| C13 | 0.0126(18)            | 0.0145(17)            | 0.030(2)              | 0.0021(15)            | -0.0056(16)           | -0.0033(15)           |
| C14 | 0.0123(19)            | 0.026(2)              | 0.042(3)              | 0.0032(19)            | -0.0098(18)           | -0.0056(17)           |
| C15 | 0.0140(19)            | 0.022(2)              | 0.033(2)              | 0.0012(17)            | -0.0097(17)           | 0.0011(16)            |
| C16 | 0.0174(19)            | 0.0160(18)            | 0.0192(18)            | 0.0012(14)            | -0.0056(15)           | -0.0007(15)           |
| C17 | 0.0134(18)            | 0.0152(17)            | 0.0129(16)            | -0.0005(13)           | 0.0006(14)            | -0.0026(14)           |
| C18 | 0.029(2)              | 0.0182(19)            | 0.027(2)              | 0.0069(16)            | -0.0067(18)           | -0.0033(17)           |
| C19 | 0.028(2)              | 0.0134(18)            | 0.025(2)              | 0.0064(15)            | -0.0003(17)           | -0.0027(16)           |
| C20 | 0.025(2)              | 0.0153(18)            | 0.0192(18)            | 0.0024(14)            | 0.0032(16)            | -0.0074(16)           |
| C21 | 0.0171(18)            | 0.0143(17)            | 0.0133(16)            | -0.0012(13)           | 0.0002(14)            | -0.0041(14)           |
| C22 | 0.027(2)              | 0.0173(19)            | 0.032(2)              | 0.0011(16)            | 0.0042(18)            | -0.0108(17)           |
| C23 | 0.020(2)              | 0.029(2)              | 0.040(3)              | -0.0008(19)           | 0.0000(19)            | -0.0177(19)           |
| C24 | 0.0153(19)            | 0.025(2)              | 0.0230(19)            | -0.0005(15)           | -0.0016(15)           | -0.0105(16)           |
| C25 | 0.0101(16)            | 0.0197(18)            | 0.0160(17)            | -0.0039(14)           | -0.0006(14)           | -0.0049(14)           |
| C26 | 0.0110(17)            | 0.0158(17)            | 0.0173(17)            | 0.0007(13)            | -0.0031(14)           | -0.0073(14)           |
| C27 | 0.0134(18)            | 0.028(2)              | 0.0158(17)            | 0.0037(15)            | -0.0042(14)           | -0.0112(16)           |
| C28 | 0.0133(18)            | 0.0151(17)            | 0.0152(17)            | -0.0001(13)           | -0.0028(14)           | -0.0070(14)           |
| C29 | 0.0175(19)            | 0.036(2)              | 0.0127(17)            | 0.0025(15)            | -0.0026(15)           | -0.0133(17)           |
| C30 | 0.0103(16)            | 0.0187(17)            | 0.0165(17)            | 0.0029(13)            | -0.0033(14)           | -0.0106(14)           |
| C31 | 0.0147(18)            | 0.035(2)              | 0.0161(18)            | -0.0012(16)           | -0.0001(15)           | -0.0141(17)           |

|     | <b>U<sub>11</sub></b> | <b>U<sub>22</sub></b> | <b>U<sub>33</sub></b> | <b>U<sub>23</sub></b> | <b>U<sub>13</sub></b> | <b>U<sub>12</sub></b> |
|-----|-----------------------|-----------------------|-----------------------|-----------------------|-----------------------|-----------------------|
| C32 | 0.0097(17)            | 0.0161(17)            | 0.0204(18)            | 0.0022(14)            | -0.0037(14)           | -0.0055(14)           |



**Table S94.** Hydrogen atomic coordinates and isotropic atomic displacement parameters ( $\text{\AA}^2$ ) for  $[\{\text{Cu}(\text{o-phen})\}_2\text{Mo}_2\text{F}_3\text{O}_4(\text{OH})(\text{H}_2\text{O})_4(1,3\text{-O}_3\text{PC}_8\text{H}_8\text{PO}_3)]\cdot\text{H}_2\text{O}$  (**12** $\cdot\text{H}_2\text{O}$ ).

|      | <b>x/a</b> | <b>y/b</b> | <b>z/c</b> | <b>U(eq)</b> |
|------|------------|------------|------------|--------------|
| H1C  | 0.469(4)   | 1.092(3)   | 0.8398(12) | 0.019        |
| H1D  | 0.455(5)   | 1.043(2)   | 0.915(2)   | 0.019        |
| H6C  | 0.617(4)   | 1.077(2)   | 0.542(4)   | 0.048        |
| H6D  | 0.488(3)   | 1.157(4)   | 0.533(4)   | 0.048        |
| H9C  | 0.930(6)   | 0.917(2)   | 0.563(3)   | 0.036        |
| H9D  | 0.934(5)   | 0.862(4)   | 0.6337(13) | 0.036        |
| H10C | 0.742(4)   | 0.9121(17) | 0.928(3)   | 0.021        |
| H10D | 0.715(3)   | 0.817(3)   | 0.954(3)   | 0.021        |
| H90A | 0.849(7)   | 0.042(3)   | 0.504(3)   | 0.061        |
| H90B | 0.830(7)   | 0.107(5)   | 0.5724(13) | 0.061        |
| H1   | 0.2563     | 1.2035     | 0.7264     | 0.022        |
| H2   | 0.0435     | 1.3386     | 0.7023     | 0.026        |
| H3   | 0.0258     | 1.5214     | 0.6443     | 0.029        |
| H6   | 0.1415     | 1.6681     | 0.5906     | 0.032        |
| H7   | 0.3345     | 1.7106     | 0.5653     | 0.03         |
| H10  | 0.5886     | 1.6423     | 0.5679     | 0.03         |
| H11  | 0.7852     | 1.4910     | 0.5958     | 0.028        |
| H12  | 0.7790     | 1.3084     | 0.6423     | 0.024        |
| H13  | 1.1205     | 0.8030     | 0.7798     | 0.023        |

|      | <b>x/a</b> | <b>y/b</b> | <b>z/c</b> | <b>U(eq)</b> |
|------|------------|------------|------------|--------------|
| H14  | 1.3192     | 0.6799     | 0.8238     | 0.032        |
| H15  | 1.3363     | 0.4973     | 0.8826     | 0.03         |
| H18  | 1.2213     | 0.3469     | 0.9293     | 0.032        |
| H19  | 1.0355     | 0.3005     | 0.9419     | 0.03         |
| H22  | 0.7958     | 0.3534     | 0.9131     | 0.032        |
| H23  | 0.6186     | 0.4880     | 0.8561     | 0.034        |
| H24  | 0.6283     | 0.6666     | 0.8027     | 0.025        |
| H25A | 0.4339     | 0.8946     | 0.6348     | 0.019        |
| H25B | 0.4895     | 0.7909     | 0.6985     | 0.019        |
| H27  | 0.3857     | 0.8711     | 0.8636     | 0.022        |
| H28  | 0.2032     | 1.0047     | 0.6685     | 0.017        |
| H29  | 0.1764     | 0.9580     | 0.9584     | 0.026        |
| H31  | -0.0209    | 1.0693     | 0.9106     | 0.025        |
| H32A | 0.9769     | 1.1331     | 0.6896     | 0.018        |
| H32B | 0.9003     | 1.1973     | 0.7797     | 0.018        |

**Table S95.** Sample and crystal data for [ $\{\text{Cu}(\text{terpy})\}_2(\text{H}_2\text{O})(\text{OH})\text{Mo}_2\text{F}_4\text{O}_3(1,2\text{-O}_3\text{PC}_8\text{H}_8\text{PO}_3)$ ][ $\{\text{Cu}(\text{terpy})(\text{H}_2\text{O})\}\text{Mo}_2\text{F}_3\text{O}_4(1,2\text{-O}_3\text{PC}_8\text{H}_8\text{PO}_3)$ ] $\cdot\text{H}_2\text{O}$  (**13** $\cdot\text{H}_2\text{O}$ ).

|                        |                                                                                                                                                                                                                                                                                                                 |                             |
|------------------------|-----------------------------------------------------------------------------------------------------------------------------------------------------------------------------------------------------------------------------------------------------------------------------------------------------------------|-----------------------------|
| Identification code    | [ $\{\text{Cu}(\text{terpy})\}_2(\text{H}_2\text{O})(\text{OH})\text{Mo}_2\text{F}_4\text{O}_3(1,2\text{-O}_3\text{PC}_8\text{H}_8\text{PO}_3)$ ][ $\{\text{Cu}(\text{terpy})(\text{H}_2\text{O})\}\text{Mo}_2\text{F}_3\text{O}_4(1,2\text{-O}_3\text{PC}_8\text{H}_8\text{PO}_3)$ ] $\cdot\text{H}_2\text{O}$ |                             |
| Chemical formula       | $\text{C}_{61}\text{H}_{55}\text{Cu}_3\text{F}_6\text{Mo}_4\text{N}_9\text{O}_{24}\text{P}_4$                                                                                                                                                                                                                   |                             |
| Formula weight         | 2110.40                                                                                                                                                                                                                                                                                                         |                             |
| Temperature            | 90(2) K                                                                                                                                                                                                                                                                                                         |                             |
| Wavelength             | 0.71073 Å                                                                                                                                                                                                                                                                                                       |                             |
| Crystal size           | 0.044 x 0.071 x 0.397 mm                                                                                                                                                                                                                                                                                        |                             |
| Crystal system         | Triclinic                                                                                                                                                                                                                                                                                                       |                             |
| Space group            | P -1                                                                                                                                                                                                                                                                                                            |                             |
| Unit cell dimensions   | $a = 8.9990(6)$ Å                                                                                                                                                                                                                                                                                               | $\alpha = 113.584(2)^\circ$ |
|                        | $b = 20.6937(16)$ Å                                                                                                                                                                                                                                                                                             | $\beta = 96.090(2)^\circ$   |
|                        | $c = 21.1594(16)$ Å                                                                                                                                                                                                                                                                                             | $\gamma = 95.628(2)^\circ$  |
| Volume                 | $3547.9(5)$ Å <sup>3</sup>                                                                                                                                                                                                                                                                                      |                             |
| Z                      | 2                                                                                                                                                                                                                                                                                                               |                             |
| Density (calculated)   | 1.975 g/cm <sup>3</sup>                                                                                                                                                                                                                                                                                         |                             |
| Absorption coefficient | 1.758 mm <sup>-1</sup>                                                                                                                                                                                                                                                                                          |                             |
| F(000)                 | 2090                                                                                                                                                                                                                                                                                                            |                             |

**Table S96.** Data collection and structure refinement for [ $\{\text{Cu}(\text{terpy})\}_2(\text{H}_2\text{O})(\text{OH})\text{Mo}_2\text{F}_4\text{O}_3(1,2\text{-O}_3\text{PC}_8\text{H}_8\text{PO}_3)$ ][ $\{\text{Cu}(\text{terpy})(\text{H}_2\text{O})\}\text{Mo}_2\text{F}_3\text{O}_4(1,2\text{-O}_3\text{PC}_8\text{H}_8\text{PO}_3)\cdot\text{H}_2\text{O}$  (**13**·H<sub>2</sub>O).

|                                     |                                                                                                                                                               |                           |
|-------------------------------------|---------------------------------------------------------------------------------------------------------------------------------------------------------------|---------------------------|
| Theta range for data collection     | 1.06 to 25.68°                                                                                                                                                |                           |
| Index ranges                        | -10≤h≤10, -25≤k≤24, -25≤l≤25                                                                                                                                  |                           |
| Reflections collected               | 41328                                                                                                                                                         |                           |
| Independent reflections             | 13390 [R(int) = 0.0405]                                                                                                                                       |                           |
| Coverage of independent reflections | 99.7%                                                                                                                                                         |                           |
| Absorption correction               | multi-scan                                                                                                                                                    |                           |
| Max. and min. transmission          | 0.9270 and 0.5420                                                                                                                                             |                           |
| Structure solution technique        | direct methods                                                                                                                                                |                           |
| Structure solution program          | SHELXL-2013 (Sheldrick, 2013)                                                                                                                                 |                           |
| Refinement method                   | Full-matrix least-squares on F <sup>2</sup>                                                                                                                   |                           |
| Refinement program                  | SHELXL-2013 (Sheldrick, 2013)                                                                                                                                 |                           |
| Function minimized                  | $\Sigma w(F_o^2 - F_c^2)^2$                                                                                                                                   |                           |
| Data / restraints / parameters      | 13390 / 344 / 1018                                                                                                                                            |                           |
| Goodness-of-fit on F <sup>2</sup>   | 1.035                                                                                                                                                         |                           |
| $\Delta/\sigma_{\text{max}}$        | 0.013                                                                                                                                                         |                           |
| Final R indices                     | 10415 data; I>2σ(I)                                                                                                                                           | R1 = 0.0325, wR2 = 0.0634 |
|                                     | all data                                                                                                                                                      | R1 = 0.0507, wR2 = 0.0678 |
| Weighting scheme                    | w=1/[σ <sup>2</sup> (F <sub>o</sub> <sup>2</sup> )+(0.0291P) <sup>2</sup> +0.8323P]<br>where P=(F <sub>o</sub> <sup>2</sup> +2F <sub>c</sub> <sup>2</sup> )/3 |                           |
| Largest diff. peak and hole         | 0.889 and -1.014 eÅ <sup>-3</sup>                                                                                                                             |                           |
| R.M.S. deviation from mean          | 0.107 eÅ <sup>-3</sup>                                                                                                                                        |                           |

**Table S97.** Atomic coordinates and equivalent isotropic atomic displacement parameters ( $\text{\AA}^2$ ) for  $[\{\text{Cu}(\text{terpy})\}_2(\text{H}_2\text{O})(\text{OH})\text{Mo}_2\text{F}_4\text{O}_3(1,2\text{-O}_3\text{PC}_8\text{H}_8\text{PO}_3)][\{\text{Cu}(\text{terpy})(\text{H}_2\text{O})\}\text{Mo}_2\text{F}_3\text{O}_4(1,2\text{-O}_3\text{PC}_8\text{H}_8\text{PO}_3)]\cdot\text{H}_2\text{O}$  (**13** $\cdot\text{H}_2\text{O}$ ).

U(eq) is defined as one third of the trace of the orthogonalized  $U_{ij}$  tensor.

|     | <b>x/a</b>  | <b>y/b</b>  | <b>z/c</b>  | <b>U(eq)</b> |
|-----|-------------|-------------|-------------|--------------|
| Mo1 | 0.04966(4)  | 0.42190(2)  | 0.30873(2)  | 0.01314(8)   |
| Mo2 | 0.97843(4)  | 0.47270(2)  | 0.14326(2)  | 0.01237(8)   |
| Mo3 | 0.23185(4)  | 0.05123(2)  | 0.66722(2)  | 0.01146(8)   |
| Mo4 | 0.18973(4)  | 0.97680(2)  | 0.81607(2)  | 0.01179(8)   |
| Cu1 | 0.52338(5)  | 0.37916(2)  | 0.12160(2)  | 0.00898(10)  |
| Cu2 | 0.28678(5)  | 0.75783(2)  | 0.52027(2)  | 0.01039(10)  |
| Cu3 | 0.81654(5)  | 0.08178(2)  | 0.82944(2)  | 0.00903(10)  |
| P1  | 0.18126(10) | 0.57577(5)  | 0.30002(5)  | 0.0088(2)    |
| P2  | 0.74535(10) | 0.48499(5)  | 0.25949(5)  | 0.00730(19)  |
| P3  | 0.29569(10) | 0.88987(5)  | 0.65822(5)  | 0.0090(2)    |
| P4  | 0.90897(10) | 0.97719(5)  | 0.69566(5)  | 0.00738(19)  |
| F1  | 0.0217(2)   | 0.40977(10) | 0.20317(10) | 0.0101(4)    |
| F2  | 0.9594(2)   | 0.32689(11) | 0.26907(11) | 0.0185(5)    |
| F3  | 0.2532(2)   | 0.04586(10) | 0.76782(10) | 0.0105(4)    |
| F4  | 0.1941(3)   | 0.14178(11) | 0.72046(11) | 0.0223(5)    |
| F5  | 0.8145(2)   | 0.40355(11) | 0.09328(11) | 0.0190(5)    |
| F6  | 0.3845(2)   | 0.00692(12) | 0.86552(11) | 0.0206(5)    |
| O1  | 0.0446(3)   | 0.43830(13) | 0.39441(13) | 0.0159(6)    |

|     | <b>x/a</b> | <b>y/b</b>  | <b>z/c</b>  | <b>U(eq)</b> |
|-----|------------|-------------|-------------|--------------|
| O2  | 0.2341(3)  | 0.40543(12) | 0.29916(12) | 0.0092(5)    |
| O3  | 0.1051(3)  | 0.52550(12) | 0.32960(12) | 0.0101(5)    |
| O4  | 0.1483(3)  | 0.54127(12) | 0.21933(12) | 0.0102(5)    |
| O5  | 0.1363(3)  | 0.64848(13) | 0.33220(12) | 0.0121(5)    |
| O6  | 0.9569(3)  | 0.52999(13) | 0.10546(12) | 0.0122(5)    |
| O7  | 0.8459(3)  | 0.51220(12) | 0.21797(12) | 0.0096(5)    |
| O8  | 0.8281(3)  | 0.44287(12) | 0.29364(12) | 0.0090(5)    |
| O9  | 0.5948(3)  | 0.44320(12) | 0.21658(12) | 0.0097(5)    |
| O10 | 0.2974(3)  | 0.35031(14) | 0.15383(14) | 0.0153(6)    |
| O11 | 0.2016(3)  | 0.05196(13) | 0.58692(13) | 0.0139(6)    |
| O12 | 0.2344(3)  | 0.94571(12) | 0.63479(12) | 0.0097(5)    |
| O13 | 0.2808(3)  | 0.90713(13) | 0.73446(12) | 0.0129(6)    |
| O14 | 0.2171(3)  | 0.81560(12) | 0.60943(12) | 0.0109(5)    |
| O15 | 0.0063(3)  | 0.95261(12) | 0.74312(12) | 0.0114(5)    |
| O16 | 0.1180(3)  | 0.05225(12) | 0.87517(12) | 0.0079(5)    |
| O17 | 0.1303(3)  | 0.91363(12) | 0.84339(12) | 0.0114(5)    |
| O18 | 0.7893(3)  | 0.01735(12) | 0.73305(12) | 0.0098(5)    |
| O19 | 0.0027(3)  | 0.02040(12) | 0.66584(12) | 0.0095(5)    |
| O20 | 0.5751(3)  | 0.09398(15) | 0.82258(13) | 0.0154(6)    |
| O21 | 0.0819(3)  | 0.69566(13) | 0.45979(12) | 0.0119(5)    |
| O22 | 0.1145(2)  | 0.42368(11) | 0.09550(11) | 0.0053(5)    |

|     | <b>x/a</b> | <b>y/b</b>  | <b>z/c</b>  | <b>U(eq)</b> |
|-----|------------|-------------|-------------|--------------|
| O23 | 0.4320(3)  | 0.07110(13) | 0.68685(12) | 0.0125(6)    |
| O90 | 0.9421(3)  | 0.57953(15) | 0.47891(14) | 0.0201(6)    |
| N1  | 0.4492(3)  | 0.45033(15) | 0.08654(15) | 0.0095(6)    |
| N2  | 0.4444(3)  | 0.31577(15) | 0.02468(15) | 0.0096(6)    |
| N3  | 0.5824(3)  | 0.28560(15) | 0.11956(15) | 0.0100(6)    |
| N4  | 0.2811(3)  | 0.82980(15) | 0.47789(15) | 0.0111(7)    |
| N5  | 0.4796(3)  | 0.75197(15) | 0.48550(14) | 0.0091(6)    |
| N6  | 0.3627(3)  | 0.68308(16) | 0.54862(15) | 0.0115(7)    |
| N7  | 0.7985(3)  | 0.01332(15) | 0.87712(15) | 0.0110(6)    |
| N8  | 0.8712(3)  | 0.14918(15) | 0.92613(15) | 0.0106(6)    |
| N9  | 0.8769(3)  | 0.17262(15) | 0.81658(15) | 0.0112(7)    |
| C1  | 0.4475(4)  | 0.51993(19) | 0.12418(19) | 0.0123(8)    |
| C2  | 0.3770(4)  | 0.5618(2)   | 0.09699(19) | 0.0153(8)    |
| C3  | 0.3066(4)  | 0.5313(2)   | 0.02836(19) | 0.0160(8)    |
| C4  | 0.3074(4)  | 0.4596(2)   | 0.98865(19) | 0.0129(8)    |
| C5  | 0.3784(4)  | 0.42068(19) | 0.01909(18) | 0.0098(7)    |
| C6  | 0.3779(4)  | 0.34255(19) | 0.98313(18) | 0.0112(8)    |
| C7  | 0.3140(4)  | 0.2978(2)   | 0.91438(19) | 0.0158(8)    |
| C8  | 0.3173(4)  | 0.2249(2)   | 0.8914(2)   | 0.0183(9)    |
| C9  | 0.3825(4)  | 0.1980(2)   | 0.93595(19) | 0.0153(8)    |
| C10 | 0.4484(4)  | 0.24554(19) | 0.00320(18) | 0.0107(8)    |

|     | <b>x/a</b> | <b>y/b</b>  | <b>z/c</b>  | <b>U(eq)</b> |
|-----|------------|-------------|-------------|--------------|
| C11 | 0.5260(4)  | 0.22780(19) | 0.05827(19) | 0.0109(8)    |
| C12 | 0.5383(4)  | 0.15913(19) | 0.0506(2)   | 0.0135(8)    |
| C13 | 0.6088(4)  | 0.1490(2)   | 0.1064(2)   | 0.0152(8)    |
| C14 | 0.6702(4)  | 0.20748(19) | 0.1678(2)   | 0.0143(8)    |
| C15 | 0.6545(4)  | 0.2751(2)   | 0.17203(19) | 0.0131(8)    |
| C16 | 0.3814(4)  | 0.57793(19) | 0.32333(19) | 0.0112(8)    |
| C17 | 0.4925(4)  | 0.62524(18) | 0.30376(18) | 0.0097(8)    |
| C18 | 0.4451(4)  | 0.67689(18) | 0.28309(18) | 0.0117(8)    |
| C19 | 0.5443(4)  | 0.71900(18) | 0.26351(18) | 0.0124(8)    |
| C20 | 0.6948(4)  | 0.70894(19) | 0.26437(18) | 0.0118(8)    |
| C21 | 0.7443(4)  | 0.65846(18) | 0.28566(18) | 0.0119(8)    |
| C22 | 0.6450(4)  | 0.61644(18) | 0.30604(17) | 0.0083(7)    |
| C23 | 0.7113(4)  | 0.56427(18) | 0.32992(18) | 0.0084(7)    |
| C24 | 0.2918(4)  | 0.6497(2)   | 0.58250(19) | 0.0145(8)    |
| C25 | 0.3516(4)  | 0.5982(2)   | 0.5989(2)   | 0.0173(9)    |
| C26 | 0.4901(4)  | 0.5804(2)   | 0.5805(2)   | 0.0180(9)    |
| C27 | 0.5651(4)  | 0.6153(2)   | 0.54623(19) | 0.0164(8)    |
| C28 | 0.4992(4)  | 0.66669(18) | 0.53156(18) | 0.0104(8)    |
| C29 | 0.5700(4)  | 0.70947(19) | 0.49751(18) | 0.0105(8)    |
| C30 | 0.7146(4)  | 0.70977(19) | 0.48078(18) | 0.0120(8)    |
| C31 | 0.7619(4)  | 0.75610(19) | 0.45103(18) | 0.0133(8)    |



|     | <b>x/a</b> | <b>y/b</b>  | <b>z/c</b>  | <b>U(eq)</b> |
|-----|------------|-------------|-------------|--------------|
| C32 | 0.6672(4)  | 0.80046(19) | 0.43944(18) | 0.0117(8)    |
| C33 | 0.5230(4)  | 0.79703(18) | 0.45724(17) | 0.0094(7)    |
| C34 | 0.4074(4)  | 0.84090(19) | 0.45125(18) | 0.0112(8)    |
| C35 | 0.4214(4)  | 0.88931(19) | 0.42135(19) | 0.0150(8)    |
| C36 | 0.3029(4)  | 0.9267(2)   | 0.41824(19) | 0.0181(9)    |
| C37 | 0.1748(4)  | 0.9153(2)   | 0.44501(19) | 0.0164(8)    |
| C38 | 0.1686(4)  | 0.86716(19) | 0.47496(18) | 0.0133(8)    |
| C39 | 0.7634(4)  | 0.94207(19) | 0.84633(19) | 0.0122(8)    |
| C40 | 0.7606(4)  | 0.9009(2)   | 0.88442(19) | 0.0146(8)    |
| C41 | 0.7906(4)  | 0.9345(2)   | 0.95624(19) | 0.0152(8)    |
| C42 | 0.8261(4)  | 0.0085(2)   | 0.98884(19) | 0.0151(8)    |
| C43 | 0.8307(4)  | 0.04665(19) | 0.94773(18) | 0.0108(8)    |
| C44 | 0.8754(4)  | 0.12440(19) | 0.97574(18) | 0.0113(8)    |
| C45 | 0.9199(4)  | 0.1717(2)   | 0.04592(19) | 0.0166(8)    |
| C46 | 0.9572(4)  | 0.2442(2)   | 0.0622(2)   | 0.0207(9)    |
| C47 | 0.9535(4)  | 0.2681(2)   | 0.0094(2)   | 0.0196(9)    |
| C48 | 0.9096(4)  | 0.21845(19) | 0.94068(19) | 0.0139(8)    |
| C49 | 0.9039(4)  | 0.23258(19) | 0.87712(19) | 0.0130(8)    |
| C50 | 0.9230(4)  | 0.2999(2)   | 0.8768(2)   | 0.0179(9)    |
| C51 | 0.9168(4)  | 0.3055(2)   | 0.8134(2)   | 0.0213(9)    |
| C52 | 0.8943(4)  | 0.2441(2)   | 0.7522(2)   | 0.0180(9)    |

|     | <b>x/a</b> | <b>y/b</b>  | <b>z/c</b>  | <b>U(eq)</b> |
|-----|------------|-------------|-------------|--------------|
| C53 | 0.8745(4)  | 0.1785(2)   | 0.7561(2)   | 0.0140(8)    |
| C54 | 0.4941(4)  | 0.89960(19) | 0.65216(18) | 0.0101(8)    |
| C55 | 0.5884(4)  | 0.84823(18) | 0.66617(18) | 0.0089(7)    |
| C56 | 0.5331(4)  | 0.80321(19) | 0.69626(18) | 0.0116(8)    |
| C57 | 0.6212(4)  | 0.75882(19) | 0.71220(19) | 0.0157(8)    |
| C58 | 0.7678(4)  | 0.75761(19) | 0.6977(2)   | 0.0163(8)    |
| C59 | 0.8247(4)  | 0.80087(19) | 0.66749(19) | 0.0149(8)    |
| C60 | 0.7370(4)  | 0.84640(18) | 0.65178(18) | 0.0108(8)    |
| C61 | 0.8140(4)  | 0.89593(18) | 0.62431(18) | 0.0097(8)    |

**Table S98.** Bond lengths (Å) for [ $\{\text{Cu}(\text{terpy})\}_2(\text{H}_2\text{O})(\text{OH})\text{Mo}_2\text{F}_4\text{O}_3(1,2\text{-O}_3\text{PC}_8\text{H}_8\text{PO}_3)$ ][ $\{\text{Cu}(\text{terpy})(\text{H}_2\text{O})\}\text{Mo}_2\text{F}_3\text{O}_4(1,2\text{-O}_3\text{PC}_8\text{H}_8\text{PO}_3)$ ] $\cdot\text{H}_2\text{O}$  (**13** $\cdot\text{H}_2\text{O}$ ).

|         |          |         |            |
|---------|----------|---------|------------|
| Mo1-O1  | 1.712(2) | Mo1-O2  | 1.744(2)   |
| Mo1-F2  | 1.858(2) | Mo1-O3  | 2.006(2)   |
| Mo1-O8  | 2.100(2) | Mo1-F1  | 2.1294(19) |
| Mo2-O6  | 1.689(2) | Mo2-O22 | 1.799(2)   |
| Mo2-F5  | 1.840(2) | Mo2-O7  | 2.036(2)   |
| Mo2-O4  | 2.041(2) | Mo2-F1  | 2.1844(19) |
| Mo3-O11 | 1.698(2) | Mo3-O23 | 1.774(2)   |
| Mo3-F4  | 1.847(2) | Mo3-O12 | 2.013(2)   |
| Mo3-O19 | 2.092(2) | Mo3-F3  | 2.1650(19) |
| Mo4-O17 | 1.692(2) | Mo4-O16 | 1.796(2)   |
| Mo4-F6  | 1.852(2) | Mo4-O15 | 2.010(2)   |
| Mo4-O13 | 2.067(2) | Mo4-F3  | 2.1309(19) |
| Cu1-O9  | 1.907(2) | Cu1-N2  | 1.946(3)   |
| Cu1-N1  | 2.032(3) | Cu1-N3  | 2.043(3)   |
| Cu1-O10 | 2.310(3) | Cu2-N5  | 1.951(3)   |
| Cu2-O14 | 1.994(2) | Cu2-N6  | 2.020(3)   |
| Cu2-N4  | 2.024(3) | Cu2-O21 | 2.100(2)   |
| Cu3-O18 | 1.911(2) | Cu3-N8  | 1.934(3)   |
| Cu3-N9  | 2.035(3) | Cu3-N7  | 2.045(3)   |
| Cu3-O20 | 2.208(3) | P1-O5   | 1.500(2)   |

|          |            |          |            |
|----------|------------|----------|------------|
| P1-O4    | 1.546(2)   | P1-O3    | 1.554(2)   |
| P1-C16   | 1.808(4)   | P2-O9    | 1.513(2)   |
| P2-O8    | 1.534(2)   | P2-O7    | 1.540(2)   |
| P2-C23   | 1.801(3)   | P3-O14   | 1.513(3)   |
| P3-O13   | 1.530(2)   | P3-O12   | 1.553(2)   |
| P3-C54   | 1.801(3)   | P4-O18   | 1.518(2)   |
| P4-O19   | 1.525(2)   | P4-O15   | 1.531(3)   |
| P4-C61   | 1.803(4)   | F1-Mo2   | 2.1844(19) |
| F3-Mo3   | 2.1650(19) | O4-Mo2   | 2.041(2)   |
| O8-Mo1   | 2.100(2)   | O10-H10C | 0.807(19)  |
| O10-H10D | 0.824(18)  | O13-Mo4  | 2.067(2)   |
| O19-Mo3  | 2.092(2)   | O20-H20C | 0.838(19)  |
| O20-H20D | 0.814(19)  | O90-H90A | 0.817(19)  |
| O90-H90B | 0.826(19)  | N1-C1    | 1.341(4)   |
| N1-C5    | 1.360(4)   | N2-C6    | 1.335(5)   |
| N2-C10   | 1.344(4)   | N3-C15   | 1.330(5)   |
| N3-C11   | 1.368(5)   | N4-C38   | 1.344(4)   |
| N4-C34   | 1.360(4)   | N5-C29   | 1.333(4)   |
| N5-C33   | 1.343(4)   | N6-C24   | 1.344(4)   |
| N6-C28   | 1.353(4)   | N7-C39   | 1.340(4)   |
| N7-C43   | 1.355(4)   | N8-C44   | 1.339(5)   |
| N8-C48   | 1.340(5)   | N9-C53   | 1.332(5)   |

|          |          |          |          |
|----------|----------|----------|----------|
| N9-C49   | 1.357(4) | C1-C2    | 1.384(5) |
| C1-H1    | 0.95     | C2-C3    | 1.379(5) |
| C2-H2    | 0.95     | C3-C4    | 1.384(5) |
| C3-H3    | 0.95     | C4-C5    | 1.378(5) |
| C4-H4    | 0.95     | C5-C6    | 1.485(5) |
| C6-C7    | 1.394(5) | C7-C8    | 1.392(5) |
| C7-H7    | 0.95     | C8-C9    | 1.382(5) |
| C8-H8    | 0.95     | C9-C10   | 1.390(5) |
| C9-H9    | 0.95     | C10-C11  | 1.483(5) |
| C11-C12  | 1.382(5) | C12-C13  | 1.380(5) |
| C12-H12  | 0.95     | C13-C14  | 1.385(5) |
| C13-H13  | 0.95     | C14-C15  | 1.387(5) |
| C14-H14  | 0.95     | C15-H15  | 0.95     |
| C16-C17  | 1.532(5) | C16-H16A | 0.99     |
| C16-H16B | 0.99     | C17-C18  | 1.392(5) |
| C17-C22  | 1.401(5) | C18-C19  | 1.393(5) |
| C18-H18  | 0.95     | C19-C20  | 1.390(5) |
| C19-H19  | 0.95     | C20-C21  | 1.385(5) |
| C20-H20  | 0.95     | C21-C22  | 1.403(5) |
| C21-H21  | 0.95     | C22-C23  | 1.508(5) |
| C23-H23A | 0.99     | C23-H23B | 0.99     |
| C24-C25  | 1.383(5) | C24-H24  | 0.95     |

|         |          |         |          |
|---------|----------|---------|----------|
| C25-C26 | 1.385(5) | C25-H25 | 0.95     |
| C26-C27 | 1.389(5) | C26-H26 | 0.95     |
| C27-C28 | 1.389(5) | C27-H27 | 0.95     |
| C28-C29 | 1.485(5) | C29-C30 | 1.384(5) |
| C30-C31 | 1.399(5) | C30-H30 | 0.95     |
| C31-C32 | 1.385(5) | C31-H31 | 0.95     |
| C32-C33 | 1.392(5) | C32-H32 | 0.95     |
| C33-C34 | 1.474(5) | C34-C35 | 1.385(5) |
| C35-C36 | 1.388(5) | C35-H35 | 0.95     |
| C36-C37 | 1.377(5) | C36-H36 | 0.95     |
| C37-C38 | 1.378(5) | C37-H37 | 0.95     |
| C38-H38 | 0.95     | C39-C40 | 1.388(5) |
| C39-H39 | 0.95     | C40-C41 | 1.377(5) |
| C40-H40 | 0.95     | C41-C42 | 1.391(5) |
| C41-H41 | 0.95     | C42-C43 | 1.391(5) |
| C42-H42 | 0.95     | C43-C44 | 1.470(5) |
| C44-C45 | 1.399(5) | C45-C46 | 1.395(5) |
| C45-H45 | 0.95     | C46-C47 | 1.389(5) |
| C46-H46 | 0.95     | C47-C48 | 1.390(5) |
| C47-H47 | 0.95     | C48-C49 | 1.483(5) |
| C49-C50 | 1.389(5) | C50-C51 | 1.388(5) |
| C50-H50 | 0.95     | C51-C52 | 1.381(5) |

|          |          |          |          |
|----------|----------|----------|----------|
| C51-H51  | 0.95     | C52-C53  | 1.389(5) |
| C52-H52  | 0.95     | C53-H53  | 0.95     |
| C54-C55  | 1.521(5) | C54-H54A | 0.99     |
| C54-H54B | 0.99     | C55-C56  | 1.404(5) |
| C55-C60  | 1.403(5) | C56-C57  | 1.386(5) |
| C56-H56  | 0.95     | C57-C58  | 1.385(5) |
| C57-H57  | 0.95     | C58-C59  | 1.383(5) |
| C58-H58  | 0.95     | C59-C60  | 1.401(5) |
| C59-H59  | 0.95     | C60-C61  | 1.514(5) |
| C61-H61A | 0.99     | C61-H61B | 0.99     |

**Table S99.** Bond angles (°) for [ $\{\text{Cu}(\text{terpy})\}_2(\text{H}_2\text{O})(\text{OH})\text{Mo}_2\text{F}_4\text{O}_3(1,2\text{-O}_3\text{PC}_8\text{H}_8\text{PO}_3)$ ][ $\{\text{Cu}(\text{terpy})(\text{H}_2\text{O})\}\text{Mo}_2\text{F}_3\text{O}_4(1,2\text{-O}_3\text{PC}_8\text{H}_8\text{PO}_3)$ ] $\cdot\text{H}_2\text{O}$  (**13** $\cdot\text{H}_2\text{O}$ ).

|             |            |             |            |
|-------------|------------|-------------|------------|
| O1-Mo1-O2   | 102.77(12) | O1-Mo1-F2   | 97.97(11)  |
| O2-Mo1-F2   | 96.36(10)  | O1-Mo1-O3   | 93.51(11)  |
| O2-Mo1-O3   | 92.59(10)  | F2-Mo1-O3   | 163.50(10) |
| O1-Mo1-O8   | 92.59(11)  | O2-Mo1-O8   | 164.31(10) |
| F2-Mo1-O8   | 84.50(9)   | O3-Mo1-O8   | 83.18(9)   |
| O1-Mo1-F1   | 170.17(10) | O2-Mo1-F1   | 86.67(9)   |
| F2-Mo1-F1   | 83.50(8)   | O3-Mo1-F1   | 83.21(8)   |
| O8-Mo1-F1   | 77.84(8)   | O6-Mo2-O22  | 100.54(10) |
| O6-Mo2-F5   | 99.70(11)  | O22-Mo2-F5  | 95.02(10)  |
| O6-Mo2-O7   | 97.81(10)  | O22-Mo2-O7  | 161.07(10) |
| F5-Mo2-O7   | 86.43(9)   | O6-Mo2-O4   | 93.31(11)  |
| O22-Mo2-O4  | 90.49(10)  | F5-Mo2-O4   | 164.68(9)  |
| O7-Mo2-O4   | 83.81(9)   | O6-Mo2-F1   | 173.02(10) |
| O22-Mo2-F1  | 81.55(8)   | F5-Mo2-F1   | 86.70(9)   |
| O7-Mo2-F1   | 79.69(8)   | O4-Mo2-F1   | 79.97(8)   |
| O11-Mo3-O23 | 100.86(11) | O11-Mo3-F4  | 99.26(11)  |
| O23-Mo3-F4  | 96.79(11)  | O11-Mo3-O12 | 97.18(11)  |
| O23-Mo3-O12 | 92.43(10)  | F4-Mo3-O12  | 159.26(9)  |
| O11-Mo3-O19 | 93.53(10)  | O23-Mo3-O19 | 165.16(10) |
| F4-Mo3-O19  | 84.30(9)   | O12-Mo3-O19 | 82.15(9)   |



|             |            |             |            |
|-------------|------------|-------------|------------|
| O11-Mo3-F3  | 175.64(10) | O23-Mo3-F3  | 83.28(9)   |
| F4-Mo3-F3   | 81.46(8)   | O12-Mo3-F3  | 81.22(8)   |
| O19-Mo3-F3  | 82.25(8)   | O17-Mo4-O16 | 100.81(11) |
| O17-Mo4-F6  | 99.84(11)  | O16-Mo4-F6  | 93.54(10)  |
| O17-Mo4-O15 | 94.56(11)  | O16-Mo4-O15 | 91.53(10)  |
| F6-Mo4-O15  | 163.55(9)  | O17-Mo4-O13 | 93.94(10)  |
| O16-Mo4-O13 | 164.89(10) | F6-Mo4-O13  | 87.12(10)  |
| O15-Mo4-O13 | 83.97(10)  | O17-Mo4-F3  | 172.30(10) |
| O16-Mo4-F3  | 84.51(9)   | F6-Mo4-F3   | 85.27(9)   |
| O15-Mo4-F3  | 79.65(8)   | O13-Mo4-F3  | 80.49(8)   |
| O9-Cu1-N2   | 177.89(11) | O9-Cu1-N1   | 98.50(11)  |
| N2-Cu1-N1   | 79.82(12)  | O9-Cu1-N3   | 101.68(11) |
| N2-Cu1-N3   | 80.08(12)  | N1-Cu1-N3   | 159.55(12) |
| O9-Cu1-O10  | 88.97(10)  | N2-Cu1-O10  | 89.94(11)  |
| N1-Cu1-O10  | 95.67(10)  | N3-Cu1-O10  | 88.04(10)  |
| N5-Cu2-O14  | 135.71(11) | N5-Cu2-N6   | 79.48(12)  |
| O14-Cu2-N6  | 97.66(11)  | N5-Cu2-N4   | 79.90(12)  |
| O14-Cu2-N4  | 97.50(11)  | N6-Cu2-N4   | 159.37(11) |
| N5-Cu2-O21  | 123.37(11) | O14-Cu2-O21 | 100.91(9)  |
| N6-Cu2-O21  | 96.82(11)  | N4-Cu2-O21  | 93.96(11)  |
| O18-Cu3-N8  | 172.65(11) | O18-Cu3-N9  | 96.92(11)  |
| N8-Cu3-N9   | 80.11(12)  | O18-Cu3-N7  | 101.97(11) |

|              |            |               |            |
|--------------|------------|---------------|------------|
| N8-Cu3-N7    | 80.13(12)  | N9-Cu3-N7     | 159.36(12) |
| O18-Cu3-O20  | 91.79(10)  | N8-Cu3-O20    | 95.04(11)  |
| N9-Cu3-O20   | 92.50(11)  | N7-Cu3-O20    | 95.12(11)  |
| O5-P1-O4     | 113.68(14) | O5-P1-O3      | 110.56(13) |
| O4-P1-O3     | 110.40(13) | O5-P1-C16     | 111.81(16) |
| O4-P1-C16    | 105.95(15) | O3-P1-C16     | 103.92(15) |
| O9-P2-O8     | 111.63(14) | O9-P2-O7      | 112.77(14) |
| O8-P2-O7     | 111.97(13) | O9-P2-C23     | 108.58(15) |
| O8-P2-C23    | 106.32(15) | O7-P2-C23     | 105.08(14) |
| O14-P3-O13   | 112.03(14) | O14-P3-O12    | 109.96(14) |
| O13-P3-O12   | 111.37(13) | O14-P3-C54    | 110.77(15) |
| O13-P3-C54   | 108.04(16) | O12-P3-C54    | 104.39(15) |
| O18-P4-O19   | 111.66(13) | O18-P4-O15    | 110.85(14) |
| O19-P4-O15   | 112.78(14) | O18-P4-C61    | 108.00(15) |
| O19-P4-C61   | 108.32(15) | O15-P4-C61    | 104.86(15) |
| Mo1-F1-Mo2   | 139.47(9)  | Mo4-F3-Mo3    | 141.56(10) |
| P1-O3-Mo1    | 141.91(14) | P1-O4-Mo2     | 137.07(13) |
| P2-O7-Mo2    | 138.42(15) | P2-O8-Mo1     | 136.97(13) |
| P2-O9-Cu1    | 136.25(14) | Cu1-O10-H10C  | 112.(3)    |
| Cu1-O10-H10D | 109.(3)    | H10C-O10-H10D | 107.(4)    |
| P3-O12-Mo3   | 142.24(15) | P3-O13-Mo4    | 140.65(15) |
| P3-O14-Cu2   | 122.61(13) | P4-O15-Mo4    | 146.80(15) |

|               |            |               |            |
|---------------|------------|---------------|------------|
| P4-O18-Cu3    | 125.65(15) | P4-O19-Mo3    | 137.29(15) |
| Cu3-O20-H20C  | 116.(3)    | Cu3-O20-H20D  | 119.(3)    |
| H20C-O20-H20D | 96.(4)     | H90A-O90-H90B | 108.(4)    |
| C1-N1-C5      | 117.9(3)   | C1-N1-Cu1     | 127.3(3)   |
| C5-N1-Cu1     | 114.4(2)   | C6-N2-C10     | 122.0(3)   |
| C6-N2-Cu1     | 119.0(2)   | C10-N2-Cu1    | 118.8(2)   |
| C15-N3-C11    | 118.8(3)   | C15-N3-Cu1    | 127.4(2)   |
| C11-N3-Cu1    | 113.5(2)   | C38-N4-C34    | 118.6(3)   |
| C38-N4-Cu2    | 126.8(2)   | C34-N4-Cu2    | 114.7(2)   |
| C29-N5-C33    | 122.4(3)   | C29-N5-Cu2    | 119.0(2)   |
| C33-N5-Cu2    | 118.2(2)   | C24-N6-C28    | 118.4(3)   |
| C24-N6-Cu2    | 126.4(3)   | C28-N6-Cu2    | 115.2(2)   |
| C39-N7-C43    | 119.3(3)   | C39-N7-Cu3    | 127.4(2)   |
| C43-N7-Cu3    | 113.3(2)   | C44-N8-C48    | 122.5(3)   |
| C44-N8-Cu3    | 118.7(2)   | C48-N8-Cu3    | 118.7(2)   |
| C53-N9-C49    | 119.3(3)   | C53-N9-Cu3    | 126.5(2)   |
| C49-N9-Cu3    | 113.7(2)   | N1-C1-C2      | 122.6(4)   |
| N1-C1-H1      | 118.7      | C2-C1-H1      | 118.7      |
| C3-C2-C1      | 119.0(3)   | C3-C2-H2      | 120.5      |
| C1-C2-H2      | 120.5      | C2-C3-C4      | 119.2(4)   |
| C2-C3-H3      | 120.4      | C4-C3-H3      | 120.4      |
| C5-C4-C3      | 118.8(4)   | C5-C4-H4      | 120.6      |

|             |          |               |          |
|-------------|----------|---------------|----------|
| C3-C4-H4    | 120.6    | N1-C5-C4      | 122.4(3) |
| N1-C5-C6    | 113.9(3) | C4-C5-C6      | 123.6(3) |
| N2-C6-C7    | 120.3(3) | N2-C6-C5      | 112.8(3) |
| C7-C6-C5    | 126.9(3) | C8-C7-C6      | 118.3(4) |
| C8-C7-H7    | 120.8    | C6-C7-H7      | 120.8    |
| C9-C8-C7    | 120.5(4) | C9-C8-H8      | 119.8    |
| C7-C8-H8    | 119.8    | C8-C9-C10     | 118.4(3) |
| C8-C9-H9    | 120.8    | C10-C9-H9     | 120.8    |
| N2-C10-C9   | 120.4(3) | N2-C10-C11    | 112.7(3) |
| C9-C10-C11  | 126.9(3) | N3-C11-C12    | 121.5(3) |
| N3-C11-C10  | 114.4(3) | C12-C11-C10   | 124.1(3) |
| C13-C12-C11 | 119.0(3) | C13-C12-H12   | 120.5    |
| C11-C12-H12 | 120.5    | C12-C13-C14   | 119.7(3) |
| C12-C13-H13 | 120.2    | C14-C13-H13   | 120.2    |
| C13-C14-C15 | 118.5(4) | C13-C14-H14   | 120.7    |
| C15-C14-H14 | 120.7    | N3-C15-C14    | 122.5(3) |
| N3-C15-H15  | 118.7    | C14-C15-H15   | 118.7    |
| C17-C16-P1  | 118.1(3) | C17-C16-H16A  | 107.8    |
| P1-C16-H16A | 107.8    | C17-C16-H16B  | 107.8    |
| P1-C16-H16B | 107.8    | H16A-C16-H16B | 107.1    |
| C18-C17-C22 | 118.8(3) | C18-C17-C16   | 121.5(3) |
| C22-C17-C16 | 119.8(3) | C17-C18-C19   | 122.0(3) |

|             |          |               |          |
|-------------|----------|---------------|----------|
| C17-C18-H18 | 119.0    | C19-C18-H18   | 119.0    |
| C20-C19-C18 | 119.0(3) | C20-C19-H19   | 120.5    |
| C18-C19-H19 | 120.5    | C21-C20-C19   | 119.8(3) |
| C21-C20-H20 | 120.1    | C19-C20-H20   | 120.1    |
| C20-C21-C22 | 121.3(3) | C20-C21-H21   | 119.3    |
| C22-C21-H21 | 119.3    | C21-C22-C17   | 119.1(3) |
| C21-C22-C23 | 117.0(3) | C17-C22-C23   | 123.9(3) |
| C22-C23-P2  | 113.8(2) | C22-C23-H23A  | 108.8    |
| P2-C23-H23A | 108.8    | C22-C23-H23B  | 108.8    |
| P2-C23-H23B | 108.8    | H23A-C23-H23B | 107.7    |
| N6-C24-C25  | 122.4(3) | N6-C24-H24    | 118.8    |
| C25-C24-H24 | 118.8    | C26-C25-C24   | 119.3(3) |
| C26-C25-H25 | 120.3    | C24-C25-H25   | 120.3    |
| C25-C26-C27 | 118.7(4) | C25-C26-H26   | 120.6    |
| C27-C26-H26 | 120.6    | C28-C27-C26   | 119.1(4) |
| C28-C27-H27 | 120.5    | C26-C27-H27   | 120.5    |
| N6-C28-C27  | 122.0(3) | N6-C28-C29    | 113.6(3) |
| C27-C28-C29 | 124.4(3) | N5-C29-C30    | 120.8(3) |
| N5-C29-C28  | 112.5(3) | C30-C29-C28   | 126.6(3) |
| C29-C30-C31 | 117.7(3) | C29-C30-H30   | 121.1    |
| C31-C30-H30 | 121.1    | C32-C31-C30   | 120.8(3) |
| C32-C31-H31 | 119.6    | C30-C31-H31   | 119.6    |

|             |          |             |          |
|-------------|----------|-------------|----------|
| C31-C32-C33 | 118.3(3) | C31-C32-H32 | 120.8    |
| C33-C32-H32 | 120.8    | N5-C33-C32  | 119.9(3) |
| N5-C33-C34  | 113.2(3) | C32-C33-C34 | 126.8(3) |
| N4-C34-C35  | 121.5(3) | N4-C34-C33  | 113.9(3) |
| C35-C34-C33 | 124.7(3) | C36-C35-C34 | 118.8(3) |
| C36-C35-H35 | 120.6    | C34-C35-H35 | 120.6    |
| C37-C36-C35 | 119.7(3) | C37-C36-H36 | 120.1    |
| C35-C36-H36 | 120.1    | C36-C37-C38 | 118.7(3) |
| C36-C37-H37 | 120.7    | C38-C37-H37 | 120.7    |
| N4-C38-C37  | 122.7(3) | N4-C38-H38  | 118.6    |
| C37-C38-H38 | 118.6    | N7-C39-C40  | 122.1(3) |
| N7-C39-H39  | 118.9    | C40-C39-H39 | 118.9    |
| C41-C40-C39 | 118.9(3) | C41-C40-H40 | 120.5    |
| C39-C40-H40 | 120.5    | C40-C41-C42 | 119.5(4) |
| C40-C41-H41 | 120.3    | C42-C41-H41 | 120.3    |
| C43-C42-C41 | 118.8(3) | C43-C42-H42 | 120.6    |
| C41-C42-H42 | 120.6    | N7-C43-C42  | 121.3(3) |
| N7-C43-C44  | 114.7(3) | C42-C43-C44 | 124.0(3) |
| N8-C44-C45  | 119.9(3) | N8-C44-C43  | 113.2(3) |
| C45-C44-C43 | 127.0(3) | C46-C45-C44 | 118.4(4) |
| C46-C45-H45 | 120.8    | C44-C45-H45 | 120.8    |
| C47-C46-C45 | 120.3(4) | C47-C46-H46 | 119.9    |

|             |          |               |          |
|-------------|----------|---------------|----------|
| C45-C46-H46 | 119.9    | C46-C47-C48   | 118.5(4) |
| C46-C47-H47 | 120.7    | C48-C47-H47   | 120.7    |
| N8-C48-C47  | 120.3(4) | N8-C48-C49    | 112.8(3) |
| C47-C48-C49 | 126.8(3) | N9-C49-C50    | 121.1(3) |
| N9-C49-C48  | 113.8(3) | C50-C49-C48   | 125.1(3) |
| C51-C50-C49 | 119.1(4) | C51-C50-H50   | 120.4    |
| C49-C50-H50 | 120.4    | C52-C51-C50   | 119.3(4) |
| C52-C51-H51 | 120.3    | C50-C51-H51   | 120.3    |
| C51-C52-C53 | 118.7(4) | C51-C52-H52   | 120.7    |
| C53-C52-H52 | 120.7    | N9-C53-C52    | 122.4(4) |
| N9-C53-H53  | 118.8    | C52-C53-H53   | 118.8    |
| C55-C54-P3  | 118.6(2) | C55-C54-H54A  | 107.7    |
| P3-C54-H54A | 107.7    | C55-C54-H54B  | 107.7    |
| P3-C54-H54B | 107.7    | H54A-C54-H54B | 107.1    |
| C56-C55-C60 | 117.6(3) | C56-C55-C54   | 121.7(3) |
| C60-C55-C54 | 120.6(3) | C57-C56-C55   | 121.8(3) |
| C57-C56-H56 | 119.1    | C55-C56-H56   | 119.1    |
| C56-C57-C58 | 119.9(3) | C56-C57-H57   | 120.1    |
| C58-C57-H57 | 120.1    | C59-C58-C57   | 119.5(3) |
| C59-C58-H58 | 120.2    | C57-C58-H58   | 120.2    |
| C58-C59-C60 | 121.0(3) | C58-C59-H59   | 119.5    |
| C60-C59-H59 | 119.5    | C59-C60-C55   | 120.1(3) |

|             |          |               |          |
|-------------|----------|---------------|----------|
| C59-C60-C61 | 116.9(3) | C55-C60-C61   | 122.9(3) |
| C60-C61-P4  | 110.4(2) | C60-C61-H61A  | 109.6    |
| P4-C61-H61A | 109.6    | C60-C61-H61B  | 109.6    |
| P4-C61-H61B | 109.6    | H61A-C61-H61B | 108.1    |



**Table S100.** Torsion angles (°) for [ $\{\text{Cu}(\text{terpy})\}_2(\text{H}_2\text{O})(\text{OH})\text{Mo}_2\text{F}_4\text{O}_3(1,2\text{-O}_3\text{PC}_8\text{H}_8\text{PO}_3)$ ][ $\{\text{Cu}(\text{terpy})(\text{H}_2\text{O})\}\text{Mo}_2\text{F}_3\text{O}_4(1,2\text{-O}_3\text{PC}_8\text{H}_8\text{PO}_3)$ ] $\cdot\text{H}_2\text{O}$  (**13** $\cdot\text{H}_2\text{O}$ ).

|                |           |                |             |
|----------------|-----------|----------------|-------------|
| O5-P1-O3-Mo1   | 160.4(2)  | O4-P1-O3-Mo1   | 33.8(3)     |
| C16-P1-O3-Mo1  | -79.5(3)  | O5-P1-O4-Mo2   | -94.4(2)    |
| O3-P1-O4-Mo2   | 30.5(3)   | C16-P1-O4-Mo2  | 142.4(2)    |
| O9-P2-O7-Mo2   | -76.0(2)  | O8-P2-O7-Mo2   | 50.9(3)     |
| C23-P2-O7-Mo2  | 165.9(2)  | O9-P2-O8-Mo1   | 136.31(19)  |
| O7-P2-O8-Mo1   | 8.8(3)    | C23-P2-O8-Mo1  | -105.4(2)   |
| O8-P2-O9-Cu1   | -92.0(2)  | O7-P2-O9-Cu1   | 35.1(3)     |
| C23-P2-O9-Cu1  | 151.1(2)  | O14-P3-O12-Mo3 | 166.4(2)    |
| O13-P3-O12-Mo3 | 41.6(3)   | C54-P3-O12-Mo3 | -74.7(3)    |
| O14-P3-O13-Mo4 | -117.1(2) | O12-P3-O13-Mo4 | 6.5(3)      |
| C54-P3-O13-Mo4 | 120.6(2)  | O13-P3-O14-Cu2 | -150.25(15) |
| O12-P3-O14-Cu2 | 85.34(18) | C54-P3-O14-Cu2 | -29.5(2)    |
| O18-P4-O15-Mo4 | -88.1(3)  | O19-P4-O15-Mo4 | 38.0(3)     |
| C61-P4-O15-Mo4 | 155.6(3)  | O19-P4-O18-Cu3 | -88.76(19)  |
| O15-P4-O18-Cu3 | 37.9(2)   | C61-P4-O18-Cu3 | 152.25(17)  |
| O18-P4-O19-Mo3 | 130.0(2)  | O15-P4-O19-Mo3 | 4.4(3)      |
| C61-P4-O19-Mo3 | -111.2(2) | C5-N1-C1-C2    | 0.1(5)      |
| Cu1-N1-C1-C2   | -171.6(3) | N1-C1-C2-C3    | -0.6(5)     |
| C1-C2-C3-C4    | 0.5(5)    | C2-C3-C4-C5    | 0.2(5)      |
| C1-N1-C5-C4    | 0.6(5)    | Cu1-N1-C5-C4   | 173.3(3)    |

|                 |           |                 |           |
|-----------------|-----------|-----------------|-----------|
| C1-N1-C5-C6     | -176.3(3) | Cu1-N1-C5-C6    | -3.5(4)   |
| C3-C4-C5-N1     | -0.7(5)   | C3-C4-C5-C6     | 175.8(3)  |
| C10-N2-C6-C7    | -2.1(5)   | Cu1-N2-C6-C7    | -177.0(2) |
| C10-N2-C6-C5    | 176.3(3)  | Cu1-N2-C6-C5    | 1.4(4)    |
| N1-C5-C6-N2     | 1.5(4)    | C4-C5-C6-N2     | -175.3(3) |
| N1-C5-C6-C7     | 179.8(3)  | C4-C5-C6-C7     | 3.0(6)    |
| N2-C6-C7-C8     | 2.0(5)    | C5-C6-C7-C8     | -176.2(3) |
| C6-C7-C8-C9     | 0.0(5)    | C7-C8-C9-C10    | -2.0(5)   |
| C6-N2-C10-C9    | 0.1(5)    | Cu1-N2-C10-C9   | 175.0(2)  |
| C6-N2-C10-C11   | -179.2(3) | Cu1-N2-C10-C11  | -4.3(4)   |
| C8-C9-C10-N2    | 2.0(5)    | C8-C9-C10-C11   | -178.9(3) |
| C15-N3-C11-C12  | 2.0(5)    | Cu1-N3-C11-C12  | -171.8(3) |
| C15-N3-C11-C10  | -179.8(3) | Cu1-N3-C11-C10  | 6.4(3)    |
| N2-C10-C11-N3   | -1.7(4)   | C9-C10-C11-N3   | 179.1(3)  |
| N2-C10-C11-C12  | 176.5(3)  | C9-C10-C11-C12  | -2.7(6)   |
| N3-C11-C12-C13  | 0.2(5)    | C10-C11-C12-C13 | -177.8(3) |
| C11-C12-C13-C14 | -2.2(5)   | C12-C13-C14-C15 | 1.9(5)    |
| C11-N3-C15-C14  | -2.3(5)   | Cu1-N3-C15-C14  | 170.6(2)  |
| C13-C14-C15-N3  | 0.3(5)    | O5-P1-C16-C17   | -58.9(3)  |
| O4-P1-C16-C17   | 65.5(3)   | O3-P1-C16-C17   | -178.2(2) |
| P1-C16-C17-C18  | 14.1(4)   | P1-C16-C17-C22  | -165.4(3) |
| C22-C17-C18-C19 | 1.2(5)    | C16-C17-C18-C19 | -178.4(3) |

|                 |           |                 |           |
|-----------------|-----------|-----------------|-----------|
| C17-C18-C19-C20 | 0.3(5)    | C18-C19-C20-C21 | -1.1(5)   |
| C19-C20-C21-C22 | 0.5(5)    | C20-C21-C22-C17 | 0.9(5)    |
| C20-C21-C22-C23 | -178.6(3) | C18-C17-C22-C21 | -1.7(5)   |
| C16-C17-C22-C21 | 177.8(3)  | C18-C17-C22-C23 | 177.8(3)  |
| C16-C17-C22-C23 | -2.7(5)   | C21-C22-C23-P2  | -77.1(4)  |
| C17-C22-C23-P2  | 103.4(3)  | O9-P2-C23-C22   | -65.9(3)  |
| O8-P2-C23-C22   | 173.8(2)  | O7-P2-C23-C22   | 55.0(3)   |
| C28-N6-C24-C25  | -1.6(5)   | Cu2-N6-C24-C25  | 179.0(3)  |
| N6-C24-C25-C26  | 0.5(6)    | C24-C25-C26-C27 | 0.3(6)    |
| C25-C26-C27-C28 | 0.0(6)    | C24-N6-C28-C27  | 1.9(5)    |
| Cu2-N6-C28-C27  | -178.6(3) | C24-N6-C28-C29  | -177.1(3) |
| Cu2-N6-C28-C29  | 2.4(4)    | C26-C27-C28-N6  | -1.1(6)   |
| C26-C27-C28-C29 | 177.8(3)  | C33-N5-C29-C30  | -0.3(5)   |
| Cu2-N5-C29-C30  | -172.7(3) | C33-N5-C29-C28  | 177.7(3)  |
| Cu2-N5-C29-C28  | 5.4(4)    | N6-C28-C29-N5   | -4.9(4)   |
| C27-C28-C29-N5  | 176.2(3)  | N6-C28-C29-C30  | 173.0(3)  |
| C27-C28-C29-C30 | -5.9(6)   | N5-C29-C30-C31  | 0.0(5)    |
| C28-C29-C30-C31 | -177.7(3) | C29-C30-C31-C32 | 0.6(5)    |
| C30-C31-C32-C33 | -0.9(5)   | C29-N5-C33-C32  | 0.0(5)    |
| Cu2-N5-C33-C32  | 172.4(3)  | C29-N5-C33-C34  | -177.7(3) |
| Cu2-N5-C33-C34  | -5.3(4)   | C31-C32-C33-N5  | 0.6(5)    |
| C31-C32-C33-C34 | 177.9(3)  | C38-N4-C34-C35  | -0.2(5)   |

|                 |           |                 |           |
|-----------------|-----------|-----------------|-----------|
| Cu2-N4-C34-C35  | -179.1(3) | C38-N4-C34-C33  | -179.9(3) |
| Cu2-N4-C34-C33  | 1.1(4)    | N5-C33-C34-N4   | 2.5(4)    |
| C32-C33-C34-N4  | -175.0(3) | N5-C33-C34-C35  | -177.2(3) |
| C32-C33-C34-C35 | 5.3(6)    | N4-C34-C35-C36  | -0.5(5)   |
| C33-C34-C35-C36 | 179.2(3)  | C34-C35-C36-C37 | 0.3(6)    |
| C35-C36-C37-C38 | 0.6(6)    | C34-N4-C38-C37  | 1.2(5)    |
| Cu2-N4-C38-C37  | 179.9(3)  | C36-C37-C38-N4  | -1.4(6)   |
| C43-N7-C39-C40  | -0.8(5)   | Cu3-N7-C39-C40  | 177.3(3)  |
| N7-C39-C40-C41  | 1.8(5)    | C39-C40-C41-C42 | -1.3(5)   |
| C40-C41-C42-C43 | -0.3(5)   | C39-N7-C43-C42  | -0.9(5)   |
| Cu3-N7-C43-C42  | -179.2(3) | C39-N7-C43-C44  | 176.9(3)  |
| Cu3-N7-C43-C44  | -1.4(4)   | C41-C42-C43-N7  | 1.4(5)    |
| C41-C42-C43-C44 | -176.2(3) | C48-N8-C44-C45  | 0.6(5)    |
| Cu3-N8-C44-C45  | 177.7(3)  | C48-N8-C44-C43  | -179.1(3) |
| Cu3-N8-C44-C43  | -2.1(4)   | N7-C43-C44-N8   | 2.3(4)    |
| C42-C43-C44-N8  | -180.0(3) | N7-C43-C44-C45  | -177.5(3) |
| C42-C43-C44-C45 | 0.3(6)    | N8-C44-C45-C46  | 0.8(5)    |
| C43-C44-C45-C46 | -179.5(3) | C44-C45-C46-C47 | -1.6(5)   |
| C45-C46-C47-C48 | 1.0(6)    | C44-N8-C48-C47  | -1.2(5)   |
| Cu3-N8-C48-C47  | -178.2(3) | C44-N8-C48-C49  | 176.9(3)  |
| Cu3-N8-C48-C49  | -0.1(4)   | C46-C47-C48-N8  | 0.4(5)    |
| C46-C47-C48-C49 | -177.5(3) | C53-N9-C49-C50  | 2.6(5)    |

|                 |           |                 |           |
|-----------------|-----------|-----------------|-----------|
| Cu3-N9-C49-C50  | -169.8(3) | C53-N9-C49-C48  | -177.6(3) |
| Cu3-N9-C49-C48  | 9.9(4)    | N8-C48-C49-N9   | -6.6(4)   |
| C47-C48-C49-N9  | 171.4(3)  | N8-C48-C49-C50  | 173.1(3)  |
| C47-C48-C49-C50 | -8.9(6)   | N9-C49-C50-C51  | -1.1(5)   |
| C48-C49-C50-C51 | 179.2(3)  | C49-C50-C51-C52 | -1.0(5)   |
| C50-C51-C52-C53 | 1.7(5)    | C49-N9-C53-C52  | -2.0(5)   |
| Cu3-N9-C53-C52  | 169.4(3)  | C51-C52-C53-N9  | -0.2(5)   |
| O14-P3-C54-C55  | -57.0(3)  | O13-P3-C54-C55  | 66.1(3)   |
| O12-P3-C54-C55  | -175.3(3) | P3-C54-C55-C56  | -12.4(5)  |
| P3-C54-C55-C60  | 170.2(3)  | C60-C55-C56-C57 | 0.7(5)    |
| C54-C55-C56-C57 | -176.8(3) | C55-C56-C57-C58 | -0.7(6)   |
| C56-C57-C58-C59 | 0.0(6)    | C57-C58-C59-C60 | 0.6(6)    |
| C58-C59-C60-C55 | -0.5(5)   | C58-C59-C60-C61 | 175.1(3)  |
| C56-C55-C60-C59 | -0.1(5)   | C54-C55-C60-C59 | 177.5(3)  |
| C56-C55-C60-C61 | -175.4(3) | C54-C55-C60-C61 | 2.1(5)    |
| C59-C60-C61-P4  | -86.5(3)  | C55-C60-C61-P4  | 89.0(4)   |
| O18-P4-C61-C60  | -66.9(3)  | O19-P4-C61-C60  | 172.1(2)  |
| O15-P4-C61-C60  | 51.4(3)   |                 |           |

**Table S101.** Anisotropic atomic displacement parameters ( $\text{\AA}^2$ ) for  
 $[\{\text{Cu}(\text{terpy})\}_2(\text{H}_2\text{O})(\text{OH})\text{Mo}_2\text{F}_4\text{O}_3(1,2\text{-O}_3\text{PC}_8\text{H}_8\text{PO}_3)][\{\text{Cu}(\text{terpy})(\text{H}_2\text{O})\}\text{Mo}_2\text{F}_3\text{O}_4(1,2\text{-O}_3\text{PC}_8\text{H}_8\text{PO}_3)]\cdot\text{H}_2\text{O}$  (**13**· $\text{H}_2\text{O}$ ).

The anisotropic atomic displacement factor exponent takes the form:  $-2\pi^2 [h^2 a^{*2} U_{11} + \dots + 2 h k a^* b^* U_{12}]$

|     | $U_{11}$    | $U_{22}$    | $U_{33}$    | $U_{23}$    | $U_{13}$     | $U_{12}$     |
|-----|-------------|-------------|-------------|-------------|--------------|--------------|
| Mo1 | 0.01910(19) | 0.01424(18) | 0.01190(18) | 0.00889(14) | 0.00571(14)  | 0.01011(14)  |
| Mo2 | 0.02128(19) | 0.00847(17) | 0.00677(17) | 0.00242(13) | 0.00004(14)  | 0.00526(14)  |
| Mo3 | 0.01571(18) | 0.00956(17) | 0.00962(17) | 0.00580(14) | 0.00092(13)  | -0.00273(13) |
| Mo4 | 0.01906(18) | 0.00868(17) | 0.00644(17) | 0.00374(14) | -0.00107(13) | -0.00266(13) |
| Cu1 | 0.0110(2)   | 0.0075(2)   | 0.0076(2)   | 0.00236(18) | 0.00023(18)  | 0.00173(18)  |
| Cu2 | 0.0098(2)   | 0.0114(2)   | 0.0127(2)   | 0.0072(2)   | 0.00347(18)  | 0.00241(18)  |
| Cu3 | 0.0110(2)   | 0.0068(2)   | 0.0073(2)   | 0.00121(18) | 0.00136(18)  | -0.00026(18) |
| P1  | 0.0087(5)   | 0.0083(5)   | 0.0082(5)   | 0.0027(4)   | 0.0001(4)    | 0.0005(4)    |
| P2  | 0.0071(5)   | 0.0065(5)   | 0.0088(5)   | 0.0033(4)   | 0.0022(4)    | 0.0018(4)    |
| P3  | 0.0101(5)   | 0.0089(5)   | 0.0093(5)   | 0.0044(4)   | 0.0033(4)    | 0.0030(4)    |
| P4  | 0.0067(5)   | 0.0077(5)   | 0.0070(5)   | 0.0025(4)   | 0.0004(4)    | 0.0005(4)    |
| F1  | 0.0111(11)  | 0.0112(11)  | 0.0091(11)  | 0.0050(9)   | 0.0025(8)    | 0.0028(8)    |
| F2  | 0.0160(12)  | 0.0142(12)  | 0.0265(13)  | 0.0106(10)  | -0.0010(10)  | 0.0018(9)    |
| F3  | 0.0099(11)  | 0.0126(11)  | 0.0117(11)  | 0.0081(9)   | 0.0012(8)    | 0.0004(8)    |
| F4  | 0.0307(14)  | 0.0119(12)  | 0.0233(13)  | 0.0071(10)  | 0.0009(10)   | 0.0027(10)   |
| F5  | 0.0152(12)  | 0.0201(12)  | 0.0191(12)  | 0.0059(10)  | 0.0018(9)    | 0.0018(9)    |
| F6  | 0.0186(12)  | 0.0249(13)  | 0.0182(12)  | 0.0101(11)  | -0.0007(10)  | 0.0017(10)   |

|     | $U_{11}$   | $U_{22}$   | $U_{33}$   | $U_{23}$    | $U_{13}$    | $U_{12}$    |
|-----|------------|------------|------------|-------------|-------------|-------------|
| O1  | 0.0205(15) | 0.0173(14) | 0.0149(14) | 0.0112(12)  | 0.0046(11)  | 0.0041(12)  |
| O2  | 0.0053(12) | 0.0096(13) | 0.0137(13) | 0.0065(11)  | -0.0012(10) | 0.0021(10)  |
| O3  | 0.0132(13) | 0.0076(13) | 0.0098(13) | 0.0040(11)  | 0.0018(10)  | 0.0008(10)  |
| O4  | 0.0097(13) | 0.0110(13) | 0.0094(13) | 0.0049(11)  | 0.0002(10)  | -0.0023(10) |
| O5  | 0.0112(13) | 0.0116(13) | 0.0132(14) | 0.0044(11)  | 0.0032(11)  | 0.0022(10)  |
| O6  | 0.0153(14) | 0.0121(13) | 0.0106(13) | 0.0063(11)  | 0.0009(11)  | 0.0028(11)  |
| O7  | 0.0099(13) | 0.0112(13) | 0.0109(13) | 0.0074(11)  | 0.0025(10)  | 0.0022(10)  |
| O8  | 0.0071(13) | 0.0106(13) | 0.0144(14) | 0.0096(11)  | 0.0033(10)  | 0.0025(10)  |
| O9  | 0.0085(13) | 0.0120(13) | 0.0084(13) | 0.0045(11)  | -0.0010(10) | 0.0021(10)  |
| O10 | 0.0100(14) | 0.0210(16) | 0.0163(15) | 0.0083(13)  | 0.0022(12)  | 0.0061(11)  |
| O11 | 0.0142(14) | 0.0148(14) | 0.0153(14) | 0.0090(12)  | 0.0032(11)  | 0.0015(11)  |
| O12 | 0.0112(13) | 0.0104(13) | 0.0084(13) | 0.0043(11)  | 0.0015(10)  | 0.0048(10)  |
| O13 | 0.0179(14) | 0.0142(14) | 0.0102(13) | 0.0067(11)  | 0.0050(11)  | 0.0081(11)  |
| O14 | 0.0110(13) | 0.0099(13) | 0.0103(13) | 0.0026(11)  | 0.0031(10)  | 0.0006(10)  |
| O15 | 0.0111(13) | 0.0110(13) | 0.0129(14) | 0.0073(11)  | -0.0017(10) | -0.0016(10) |
| O16 | 0.0080(13) | 0.0062(12) | 0.0066(12) | -0.0011(10) | 0.0045(10)  | 0.0012(10)  |
| O17 | 0.0126(14) | 0.0106(13) | 0.0129(14) | 0.0071(11)  | 0.0016(11)  | 0.0013(10)  |
| O18 | 0.0097(13) | 0.0092(13) | 0.0080(13) | 0.0010(10)  | 0.0010(10)  | 0.0016(10)  |
| O19 | 0.0085(13) | 0.0109(13) | 0.0112(13) | 0.0070(11)  | 0.0007(10)  | 0.0019(10)  |
| O20 | 0.0098(14) | 0.0202(16) | 0.0126(14) | 0.0041(13)  | -0.0007(11) | 0.0008(11)  |
| O21 | 0.0079(13) | 0.0141(14) | 0.0126(14) | 0.0044(11)  | 0.0007(10)  | 0.0026(10)  |

|     | $U_{11}$   | $U_{22}$   | $U_{33}$   | $U_{23}$    | $U_{13}$    | $U_{12}$    |
|-----|------------|------------|------------|-------------|-------------|-------------|
| O22 | 0.0039(12) | 0.0053(12) | 0.0047(12) | 0.0002(10)  | 0.0012(9)   | -0.0006(9)  |
| O23 | 0.0065(13) | 0.0219(15) | 0.0125(14) | 0.0128(12)  | -0.0012(10) | -0.0041(11) |
| O90 | 0.0328(17) | 0.0161(16) | 0.0138(16) | 0.0075(13)  | 0.0057(13)  | 0.0063(13)  |
| N1  | 0.0069(16) | 0.0123(16) | 0.0099(16) | 0.0056(13)  | 0.0005(12)  | 0.0006(12)  |
| N2  | 0.0093(16) | 0.0106(16) | 0.0082(15) | 0.0029(13)  | 0.0019(12)  | 0.0021(12)  |
| N3  | 0.0096(16) | 0.0096(16) | 0.0099(16) | 0.0029(13)  | 0.0025(12)  | 0.0019(12)  |
| N4  | 0.0115(16) | 0.0107(16) | 0.0122(16) | 0.0056(13)  | 0.0029(13)  | 0.0009(13)  |
| N5  | 0.0102(16) | 0.0086(16) | 0.0063(15) | 0.0011(13)  | 0.0006(12)  | 0.0013(12)  |
| N6  | 0.0146(17) | 0.0114(16) | 0.0080(16) | 0.0040(13)  | -0.0001(13) | 0.0014(13)  |
| N7  | 0.0095(16) | 0.0104(16) | 0.0103(16) | 0.0016(13)  | 0.0027(12)  | -0.0003(12) |
| N8  | 0.0076(16) | 0.0079(15) | 0.0125(16) | 0.0002(13)  | 0.0015(12)  | 0.0022(12)  |
| N9  | 0.0100(16) | 0.0076(15) | 0.0140(17) | 0.0017(13)  | 0.0037(13)  | 0.0024(12)  |
| C1  | 0.014(2)   | 0.0106(19) | 0.013(2)   | 0.0046(16)  | 0.0029(15)  | 0.0016(15)  |
| C2  | 0.018(2)   | 0.012(2)   | 0.016(2)   | 0.0046(17)  | 0.0053(16)  | 0.0069(16)  |
| C3  | 0.015(2)   | 0.022(2)   | 0.015(2)   | 0.0111(18)  | 0.0041(16)  | 0.0056(17)  |
| C4  | 0.011(2)   | 0.018(2)   | 0.012(2)   | 0.0080(16)  | 0.0017(15)  | 0.0017(16)  |
| C5  | 0.0070(18) | 0.0137(19) | 0.0097(19) | 0.0062(15)  | 0.0025(14)  | -0.0008(15) |
| C6  | 0.0085(19) | 0.0144(19) | 0.0104(19) | 0.0046(16)  | 0.0034(15)  | 0.0013(15)  |
| C7  | 0.011(2)   | 0.022(2)   | 0.0099(19) | 0.0037(17)  | -0.0009(15) | 0.0016(16)  |
| C8  | 0.016(2)   | 0.020(2)   | 0.008(2)   | -0.0034(17) | -0.0028(16) | 0.0009(17)  |
| C9  | 0.015(2)   | 0.012(2)   | 0.015(2)   | 0.0009(16)  | 0.0048(16)  | 0.0029(16)  |



|     | $U_{11}$   | $U_{22}$   | $U_{33}$   | $U_{23}$    | $U_{13}$    | $U_{12}$    |
|-----|------------|------------|------------|-------------|-------------|-------------|
| C10 | 0.0069(19) | 0.0108(19) | 0.0126(19) | 0.0026(15)  | 0.0037(14)  | 0.0007(14)  |
| C11 | 0.0052(18) | 0.0127(19) | 0.0160(19) | 0.0065(16)  | 0.0033(15)  | 0.0030(15)  |
| C12 | 0.0072(19) | 0.0096(19) | 0.018(2)   | 0.0004(16)  | 0.0018(15)  | 0.0007(15)  |
| C13 | 0.011(2)   | 0.011(2)   | 0.027(2)   | 0.0091(17)  | 0.0067(16)  | 0.0040(15)  |
| C14 | 0.011(2)   | 0.017(2)   | 0.018(2)   | 0.0101(17)  | 0.0056(16)  | 0.0058(16)  |
| C15 | 0.010(2)   | 0.014(2)   | 0.014(2)   | 0.0044(16)  | 0.0025(15)  | 0.0026(15)  |
| C16 | 0.0104(18) | 0.0100(19) | 0.0118(19) | 0.0035(16)  | -0.0002(15) | 0.0016(15)  |
| C17 | 0.0114(19) | 0.0077(18) | 0.0072(18) | 0.0006(15)  | 0.0007(15)  | 0.0002(14)  |
| C18 | 0.0113(19) | 0.0097(19) | 0.012(2)   | 0.0027(16)  | -0.0009(15) | 0.0007(15)  |
| C19 | 0.021(2)   | 0.0047(18) | 0.0105(19) | 0.0018(16)  | 0.0008(16)  | 0.0039(15)  |
| C20 | 0.014(2)   | 0.0100(19) | 0.0109(19) | 0.0041(16)  | 0.0044(15)  | -0.0019(15) |
| C21 | 0.012(2)   | 0.0091(19) | 0.012(2)   | 0.0011(16)  | 0.0034(15)  | 0.0015(15)  |
| C22 | 0.0132(19) | 0.0049(18) | 0.0026(17) | -0.0021(14) | 0.0005(14)  | -0.0002(14) |
| C23 | 0.0061(18) | 0.0074(18) | 0.0108(19) | 0.0031(15)  | 0.0018(14)  | -0.0010(14) |
| C24 | 0.012(2)   | 0.017(2)   | 0.015(2)   | 0.0064(17)  | 0.0040(16)  | 0.0019(16)  |
| C25 | 0.020(2)   | 0.018(2)   | 0.017(2)   | 0.0126(18)  | -0.0001(17) | -0.0023(17) |
| C26 | 0.023(2)   | 0.015(2)   | 0.020(2)   | 0.0119(18)  | 0.0004(17)  | 0.0040(17)  |
| C27 | 0.014(2)   | 0.017(2)   | 0.019(2)   | 0.0099(18)  | 0.0008(16)  | 0.0004(16)  |
| C28 | 0.0125(19) | 0.0081(19) | 0.0070(19) | 0.0005(15)  | -0.0024(15) | 0.0010(15)  |
| C29 | 0.0145(19) | 0.0098(19) | 0.0044(18) | 0.0001(15)  | 0.0002(14)  | 0.0032(15)  |
| C30 | 0.014(2)   | 0.0096(19) | 0.0068(19) | -0.0013(15) | -0.0009(15) | 0.0005(15)  |

|     | <b>U<sub>11</sub></b> | <b>U<sub>22</sub></b> | <b>U<sub>33</sub></b> | <b>U<sub>23</sub></b> | <b>U<sub>13</sub></b> | <b>U<sub>12</sub></b> |
|-----|-----------------------|-----------------------|-----------------------|-----------------------|-----------------------|-----------------------|
| C31 | 0.0106(19)            | 0.014(2)              | 0.013(2)              | 0.0030(16)            | 0.0033(15)            | 0.0001(15)            |
| C32 | 0.0124(19)            | 0.012(2)              | 0.0096(19)            | 0.0036(16)            | 0.0037(15)            | -0.0015(15)           |
| C33 | 0.0120(19)            | 0.0072(18)            | 0.0050(18)            | -0.0007(15)           | -0.0003(14)           | -0.0001(14)           |
| C34 | 0.015(2)              | 0.0092(19)            | 0.0065(18)            | 0.0008(15)            | 0.0020(15)            | -0.0003(15)           |
| C35 | 0.018(2)              | 0.013(2)              | 0.014(2)              | 0.0060(17)            | 0.0033(16)            | -0.0018(16)           |
| C36 | 0.029(2)              | 0.014(2)              | 0.013(2)              | 0.0077(17)            | -0.0001(17)           | 0.0034(17)            |
| C37 | 0.021(2)              | 0.016(2)              | 0.013(2)              | 0.0059(17)            | -0.0018(16)           | 0.0076(17)            |
| C38 | 0.012(2)              | 0.017(2)              | 0.011(2)              | 0.0055(16)            | 0.0000(15)            | 0.0021(16)            |
| C39 | 0.0111(19)            | 0.0111(19)            | 0.0106(19)            | 0.0010(16)            | 0.0017(15)            | -0.0006(15)           |
| C40 | 0.015(2)              | 0.0100(19)            | 0.017(2)              | 0.0041(16)            | 0.0032(16)            | -0.0031(16)           |
| C41 | 0.012(2)              | 0.020(2)              | 0.016(2)              | 0.0107(18)            | 0.0035(16)            | -0.0004(16)           |
| C42 | 0.011(2)              | 0.022(2)              | 0.0098(19)            | 0.0052(17)            | 0.0011(15)            | 0.0000(16)            |
| C43 | 0.0079(19)            | 0.0139(19)            | 0.0093(19)            | 0.0031(15)            | 0.0030(14)            | 0.0014(15)            |
| C44 | 0.0055(18)            | 0.0137(19)            | 0.0112(19)            | 0.0010(15)            | 0.0019(14)            | 0.0029(15)            |
| C45 | 0.014(2)              | 0.022(2)              | 0.011(2)              | 0.0035(17)            | 0.0023(16)            | 0.0019(17)            |
| C46 | 0.017(2)              | 0.018(2)              | 0.012(2)              | -0.0060(17)           | -0.0015(17)           | -0.0049(17)           |
| C47 | 0.020(2)              | 0.014(2)              | 0.018(2)              | 0.0005(17)            | 0.0005(17)            | -0.0002(17)           |
| C48 | 0.010(2)              | 0.0113(19)            | 0.016(2)              | 0.0011(16)            | 0.0020(15)            | 0.0025(15)            |
| C49 | 0.0053(18)            | 0.0110(19)            | 0.019(2)              | 0.0028(16)            | 0.0004(15)            | 0.0008(15)            |
| C50 | 0.014(2)              | 0.011(2)              | 0.027(2)              | 0.0063(18)            | -0.0002(17)           | 0.0021(16)            |
| C51 | 0.019(2)              | 0.013(2)              | 0.033(3)              | 0.0116(19)            | 0.0023(19)            | 0.0020(17)            |

|     | <b>U<sub>11</sub></b> | <b>U<sub>22</sub></b> | <b>U<sub>33</sub></b> | <b>U<sub>23</sub></b> | <b>U<sub>13</sub></b> | <b>U<sub>12</sub></b> |
|-----|-----------------------|-----------------------|-----------------------|-----------------------|-----------------------|-----------------------|
| C52 | 0.015(2)              | 0.020(2)              | 0.026(2)              | 0.0154(19)            | 0.0045(17)            | 0.0057(17)            |
| C53 | 0.012(2)              | 0.013(2)              | 0.019(2)              | 0.0070(17)            | 0.0023(16)            | 0.0043(16)            |
| C54 | 0.0105(18)            | 0.0097(19)            | 0.0093(19)            | 0.0042(16)            | -0.0010(15)           | -0.0008(14)           |
| C55 | 0.0109(18)            | 0.0045(18)            | 0.0065(18)            | -0.0012(15)           | -0.0040(14)           | 0.0010(14)            |
| C56 | 0.0095(19)            | 0.0110(19)            | 0.0106(19)            | 0.0011(16)            | 0.0007(15)            | 0.0001(15)            |
| C57 | 0.021(2)              | 0.0083(19)            | 0.018(2)              | 0.0065(17)            | -0.0009(17)           | -0.0004(16)           |
| C58 | 0.017(2)              | 0.009(2)              | 0.021(2)              | 0.0051(17)            | -0.0045(17)           | 0.0026(16)            |
| C59 | 0.012(2)              | 0.0086(19)            | 0.021(2)              | 0.0029(17)            | -0.0005(16)           | 0.0025(15)            |
| C60 | 0.0128(19)            | 0.0057(18)            | 0.0074(19)            | -0.0032(15)           | 0.0003(15)            | 0.0002(14)            |
| C61 | 0.0080(18)            | 0.0105(19)            | 0.0077(18)            | 0.0004(15)            | 0.0015(14)            | 0.0033(14)            |

**Table S102.** Hydrogen atomic coordinates and isotropic atomic displacement parameters ( $\text{\AA}^2$ ) for  $[\{\text{Cu}(\text{terpy})\}_2(\text{H}_2\text{O})(\text{OH})\text{Mo}_2\text{F}_4\text{O}_3(1,2\text{-O}_3\text{PC}_8\text{H}_8\text{PO}_3)][\{\text{Cu}(\text{terpy})(\text{H}_2\text{O})\}\text{Mo}_2\text{F}_3\text{O}_4(1,2\text{-O}_3\text{PC}_8\text{H}_8\text{PO}_3)]\cdot\text{H}_2\text{O}$  (**13** $\cdot\text{H}_2\text{O}$ ).

|      | <b>x/a</b> | <b>y/b</b> | <b>z/c</b> | <b>U(eq)</b> |
|------|------------|------------|------------|--------------|
| H10C | 0.231(3)   | 0.369(2)   | 0.142(2)   | 0.018        |
| H10D | 0.308(4)   | 0.366(2)   | 0.1967(10) | 0.018        |
| H20C | 0.531(4)   | 1.088(2)   | 0.7834(13) | 0.018        |
| H20D | 0.515(4)   | 1.0649(17) | 0.827(2)   | 0.018        |
| H90A | 0.937(5)   | 0.573(2)   | 0.5141(15) | 0.024        |
| H90B | 0.967(5)   | 0.5436(15) | 0.4493(17) | 0.024        |
| H1   | 0.4967     | 0.5413     | 0.1714     | 0.015        |
| H2   | 0.3770     | 0.6109     | 0.1252     | 0.018        |
| H3   | 0.2582     | 0.5592     | 0.0086     | 0.019        |
| H4   | 0.2598     | 0.4375     | -0.0588    | 0.016        |
| H7   | 0.2693     | 0.3166     | -0.1160    | 0.019        |
| H8   | 0.2744     | 0.1935     | -0.1552    | 0.022        |
| H9   | 0.3822     | 0.1481     | -0.0791    | 0.018        |
| H12  | 0.4989     | 0.1195     | 0.0077     | 0.016        |
| H13  | 0.6152     | 0.1021     | 0.1027     | 0.018        |
| H14  | 0.7218     | 0.2015     | 0.2062     | 0.017        |
| H15  | 0.6970     | 0.3153     | 0.2140     | 0.016        |
| H16A | 0.4034     | 0.5935     | 0.3746     | 0.013        |
| H16B | 0.4032     | 0.5285     | 0.3014     | 0.013        |

|      | <b>x/a</b> | <b>y/b</b> | <b>z/c</b> | <b>U(eq)</b> |
|------|------------|------------|------------|--------------|
| H18  | 0.3422     | 0.6836     | 0.2823     | 0.014        |
| H19  | 0.5095     | 0.7541     | 0.2498     | 0.015        |
| H20  | 0.7635     | 0.7366     | 0.2504     | 0.014        |
| H21  | 0.8475     | 0.6521     | 0.2865     | 0.014        |
| H23A | 0.6414     | 0.5502     | 0.3569     | 0.01         |
| H23B | 0.8080     | 0.5884     | 0.3617     | 0.01         |
| H24  | 0.1972     | 0.6618     | 0.5957     | 0.017        |
| H25  | 0.2983     | 0.5753     | 0.6226     | 0.021        |
| H26  | 0.5329     | 0.5450     | 0.5911     | 0.022        |
| H27  | 0.6603     | 0.6041     | 0.5330     | 0.02         |
| H30  | 0.7795     | 0.6796     | 0.4892     | 0.014        |
| H31  | 0.8603     | 0.7572     | 0.4386     | 0.016        |
| H32  | 0.6998     | 0.8324     | 0.4198     | 0.014        |
| H35  | 0.5106     | 0.8968     | 0.4033     | 0.018        |
| H36  | 0.3101     | 0.9599     | 0.3977     | 0.022        |
| H37  | 0.0924     | 0.9401     | 0.4429     | 0.02         |
| H38  | 0.0812     | 0.8601     | 0.4943     | 0.016        |
| H39  | 0.7397     | 0.9190     | 0.7968     | 0.015        |
| H40  | 0.7382     | 0.8503     | 0.8613     | 0.018        |
| H41  | 0.7872     | 0.9073     | 0.9833     | 0.018        |
| H42  | 0.8467     | 1.0325     | 1.0383     | 0.018        |

|      | <b>x/a</b> | <b>y/b</b> | <b>z/c</b> | <b>U(eq)</b> |
|------|------------|------------|------------|--------------|
| H45  | 0.9247     | 1.1548     | 1.0816     | 0.02         |
| H46  | 0.9853     | 1.2774     | 1.1096     | 0.025        |
| H47  | 0.9804     | 1.3173     | 1.0201     | 0.024        |
| H50  | 0.9401     | 1.3415     | 0.9195     | 0.021        |
| H51  | 0.9280     | 1.3510     | 0.8121     | 0.026        |
| H52  | 0.8923     | 1.2468     | 0.7084     | 0.022        |
| H53  | 0.8586     | 1.1362     | 0.7140     | 0.017        |
| H54A | 0.5033     | 0.8957     | 0.6046     | 0.012        |
| H54B | 0.5404     | 0.9486     | 0.6852     | 0.012        |
| H56  | 0.4324     | 0.8032     | 0.7060     | 0.014        |
| H57  | 0.5813     | 0.7293     | 0.7330     | 0.019        |
| H58  | 0.8287     | 0.7273     | 0.7085     | 0.02         |
| H59  | 0.9249     | 0.7997     | 0.6572     | 0.018        |
| H61A | 0.7378     | 0.9073     | 0.5946     | 0.012        |
| H61B | 0.8883     | 0.8720     | 0.5952     | 0.012        |

**Table S103.** Sample and crystal data for [ $\{\text{Cu}_3(\text{bpy})_2\}\text{Mo}_2\text{F}_2\text{O}_4(\text{H}_2\text{O})_2(1,3\text{-O}_3\text{PC}_8\text{H}_8\text{PO}_3)_2$ ] (**14**).

|                        |                                                                                                                                            |                            |
|------------------------|--------------------------------------------------------------------------------------------------------------------------------------------|----------------------------|
| Identification code    | [ $\{\text{Cu}_3(\text{bpy})_2\}\text{Mo}_2\text{F}_2\text{O}_4(\text{H}_2\text{O})_2(1,3\text{-O}_3\text{PC}_8\text{H}_8\text{PO}_3)_2$ ] |                            |
| Chemical formula       | $\text{C}_{36}\text{H}_{36}\text{Cu}_3\text{F}_2\text{Mo}_2\text{N}_4\text{O}_{18}\text{P}_4$                                              |                            |
| Formula weight         | 1357.07                                                                                                                                    |                            |
| Temperature            | 90(2) K                                                                                                                                    |                            |
| Wavelength             | 0.71073 Å                                                                                                                                  |                            |
| Crystal size           | 0.104 x 0.116 x 0.191 mm                                                                                                                   |                            |
| Crystal system         | Monoclinic                                                                                                                                 |                            |
| Space group            | P21/n                                                                                                                                      |                            |
| Unit cell dimensions   | $a = 8.562(2)$ Å                                                                                                                           | $\alpha = 90^\circ$        |
|                        | $b = 19.809(5)$ Å                                                                                                                          | $\beta = 103.447(3)^\circ$ |
|                        | $c = 13.219(3)$ Å                                                                                                                          | $\gamma = 90^\circ$        |
| Volume                 | $2180.5(9)$ Å <sup>3</sup>                                                                                                                 |                            |
| Z                      | 2                                                                                                                                          |                            |
| Density (calculated)   | $2.067$ g/cm <sup>3</sup>                                                                                                                  |                            |
| Absorption coefficient | $2.236$ mm <sup>-1</sup>                                                                                                                   |                            |
| F(000)                 | 1346                                                                                                                                       |                            |

**Table S104.** Data collection and structure refinement for [ $\{\text{Cu}_3(\text{bpy})_2\}\text{Mo}_2\text{F}_2\text{O}_4(\text{H}_2\text{O})_2(1,3\text{-O}_3\text{PC}_8\text{H}_8\text{PO}_3)_2$ ] (**14**).

|                                     |                                                                                      |                           |
|-------------------------------------|--------------------------------------------------------------------------------------|---------------------------|
| Theta range for data collection     | 2.06 to 26.02°                                                                       |                           |
| Index ranges                        | -10<=h<=10, -24<=k<=24, -16<=l<=16                                                   |                           |
| Reflections collected               | 15384                                                                                |                           |
| Independent reflections             | 4293 [R(int) = 0.0682]                                                               |                           |
| Coverage of independent reflections | 99.9%                                                                                |                           |
| Absorption correction               | multi-scan                                                                           |                           |
| Max. and min. transmission          | 0.8010 and 0.6750                                                                    |                           |
| Structure solution technique        | direct methods                                                                       |                           |
| Structure solution program          | SHELXL-2013 (Sheldrick, 2013)                                                        |                           |
| Refinement method                   | Full-matrix least-squares on $F^2$                                                   |                           |
| Refinement program                  | SHELXL-2013 (Sheldrick, 2013)                                                        |                           |
| Function minimized                  | $\Sigma w(F_o^2 - F_c^2)^2$                                                          |                           |
| Data / restraints / parameters      | 4293 / 101 / 320                                                                     |                           |
| Goodness-of-fit on $F^2$            | 1.062                                                                                |                           |
| $\Delta/\sigma_{\text{max}}$        | 0.001                                                                                |                           |
| Final R indices                     | 3616 data; $I > 2\sigma(I)$                                                          | R1 = 0.0485, wR2 = 0.1262 |
|                                     | all data                                                                             | R1 = 0.0573, wR2 = 0.1302 |
| Weighting scheme                    | $w = 1/[\sigma^2(F_o^2) + (0.0551P)^2 + 16.0284P]$<br>where $P = (F_o^2 + 2F_c^2)/3$ |                           |
| Largest diff. peak and hole         | 0.840 and -1.314 $\text{e}\text{\AA}^{-3}$                                           |                           |
| R.M.S. deviation from mean          | 0.162 $\text{e}\text{\AA}^{-3}$                                                      |                           |



**Table S105.** Atomic coordinates and equivalent isotropic atomic displacement parameters ( $\text{\AA}^2$ ) for [ $\{\text{Cu}_3(\text{bpy})_2\}\text{Mo}_2\text{F}_2\text{O}_4(\text{H}_2\text{O})_2(1,3\text{-O}_3\text{PC}_8\text{H}_8\text{PO}_3)_2$ ] (**14**).

U(eq) is defined as one third of the trace of the orthogonalized  $U_{ij}$  tensor.

|     | <b>x/a</b>  | <b>y/b</b>  | <b>z/c</b>  | <b>U(eq)</b> |
|-----|-------------|-------------|-------------|--------------|
| Mo1 | 0.59126(6)  | 0.08461(3)  | 0.85379(4)  | 0.01533(15)  |
| Cu1 | 0.5         | 0.5         | 0.5         | 0.0095(2)    |
| Cu2 | 0.25524(8)  | 0.47869(3)  | 0.80027(5)  | 0.01162(17)  |
| P1  | 0.31133(16) | 0.39203(7)  | 0.60006(10) | 0.0105(3)    |
| P2  | 0.19712(16) | 0.08524(7)  | 0.86128(10) | 0.0100(3)    |
| F1  | 0.7890(4)   | 0.04757(18) | 0.8549(2)   | 0.0200(7)    |
| O1  | 0.2739(4)   | 0.4099(2)   | 0.7026(3)   | 0.0133(8)    |
| O2  | 0.1626(4)   | 0.4092(2)   | 0.5124(3)   | 0.0132(8)    |
| O3  | 0.4635(4)   | 0.42138(19) | 0.5799(3)   | 0.0123(8)    |
| O4  | 0.3779(4)   | 0.1025(2)   | 0.8844(3)   | 0.0149(8)    |
| O5  | 0.1693(4)   | 0.04957(19) | 0.9566(3)   | 0.0114(8)    |
| O6  | 0.1425(4)   | 0.04842(19) | 0.7593(3)   | 0.0127(8)    |
| O7  | 0.5590(5)   | 0.9748(2)   | 0.8987(3)   | 0.0148(8)    |
| O8  | 0.4907(4)   | 0.05269(19) | 0.7286(3)   | 0.0105(8)    |
| O9  | 0.6335(5)   | 0.1644(2)   | 0.8264(3)   | 0.0189(9)    |
| N1  | 0.1289(5)   | 0.4164(2)   | 0.8675(3)   | 0.0133(9)    |
| N2  | 0.2983(5)   | 0.5213(2)   | 0.9412(3)   | 0.0134(9)    |

|     | <b>x/a</b> | <b>y/b</b> | <b>z/c</b> | <b>U(eq)</b> |
|-----|------------|------------|------------|--------------|
| C1  | 0.0342(7)  | 0.3675(3)  | 0.8180(5)  | 0.0193(12)   |
| C2  | 0.9397(8)  | 0.3290(3)  | 0.8689(5)  | 0.0218(13)   |
| C3  | 0.9490(8)  | 0.3412(3)  | 0.9722(5)  | 0.0232(13)   |
| C4  | 0.0490(7)  | 0.3915(3)  | 0.0235(5)  | 0.0194(12)   |
| C5  | 0.1362(7)  | 0.4287(3)  | 0.9683(4)  | 0.0148(11)   |
| C6  | 0.2403(6)  | 0.4860(3)  | 0.0119(4)  | 0.0151(11)   |
| C7  | 0.2754(7)  | 0.5045(3)  | 0.1158(4)  | 0.0184(12)   |
| C8  | 0.3702(7)  | 0.5601(3)  | 0.1475(4)  | 0.0214(13)   |
| C9  | 0.4261(7)  | 0.5965(3)  | 0.0749(5)  | 0.0198(12)   |
| C10 | 0.3883(7)  | 0.5756(3)  | 0.9716(4)  | 0.0164(12)   |
| C11 | 0.3306(7)  | 0.3015(3)  | 0.5984(5)  | 0.0164(11)   |
| C12 | 0.1925(7)  | 0.2634(3)  | 0.6231(4)  | 0.0143(11)   |
| C13 | 0.0455(7)  | 0.2600(3)  | 0.5505(5)  | 0.0203(13)   |
| C14 | 0.9167(7)  | 0.2265(3)  | 0.5752(5)  | 0.0235(14)   |
| C15 | 0.2052(6)  | 0.2315(3)  | 0.7191(4)  | 0.0127(11)   |
| C16 | 0.0783(7)  | 0.1985(3)  | 0.7440(4)  | 0.0136(11)   |
| C17 | 0.9317(7)  | 0.1967(3)  | 0.6711(5)  | 0.0186(12)   |
| C18 | 0.0906(7)  | 0.1645(3)  | 0.8479(4)  | 0.0141(11)   |

**Table S106.** Bond lengths (Å) for [ $\{\text{Cu}_3(\text{bpy})_2\}\text{Mo}_2\text{F}_2\text{O}_4(\text{H}_2\text{O})_2(1,3\text{-O}_3\text{PC}_8\text{H}_8\text{PO}_3)_2$ ] (**14**).

|        |          |        |          |
|--------|----------|--------|----------|
| Mo1-O9 | 1.680(4) | Mo1-O8 | 1.794(3) |
| Mo1-F1 | 1.842(3) | Mo1-O4 | 1.992(4) |
| Mo1-O2 | 2.047(4) | Mo1-O7 | 2.289(4) |
| Cu1-O5 | 1.944(4) | Cu1-O5 | 1.944(4) |
| Cu1-O3 | 1.947(4) | Cu1-O3 | 1.947(4) |
| Cu2-O6 | 1.902(4) | Cu2-O1 | 1.909(4) |
| Cu2-N1 | 1.983(5) | Cu2-N2 | 1.999(5) |
| P1-O3  | 1.506(4) | P1-O1  | 1.506(4) |
| P1-O2  | 1.547(4) | P1-C11 | 1.802(6) |
| P2-O6  | 1.508(4) | P2-O5  | 1.511(4) |
| P2-O4  | 1.545(4) | P2-C18 | 1.804(6) |
| O2-Mo1 | 2.047(4) | O5-Cu1 | 1.944(4) |
| O6-Cu2 | 1.902(4) | O7-H7C | 0.84(2)  |
| O7-H7D | 0.84(2)  | N1-C1  | 1.334(8) |
| N1-C5  | 1.341(7) | N2-C10 | 1.330(7) |
| N2-C6  | 1.351(7) | C1-C2  | 1.393(9) |
| C1-H1  | 0.95     | C2-C3  | 1.372(9) |
| C2-H2  | 0.95     | C3-C4  | 1.384(9) |
| C3-H3  | 0.95     | C4-C5  | 1.373(8) |
| C4-H4  | 0.95     | C5-C6  | 1.475(8) |
| C6-C7  | 1.386(8) | C7-C8  | 1.374(9) |

|          |          |          |          |
|----------|----------|----------|----------|
| C7-H7    | 0.95     | C8-C9    | 1.372(9) |
| C8-H8    | 0.95     | C9-C10   | 1.391(8) |
| C9-H9    | 0.95     | C10-H10  | 0.95     |
| C11-C12  | 1.501(8) | C11-H11A | 0.99     |
| C11-H11B | 0.99     | C12-C13  | 1.395(8) |
| C12-C15  | 1.399(8) | C13-C14  | 1.389(9) |
| C13-H13  | 0.95     | C14-C17  | 1.377(8) |
| C14-H14  | 0.95     | C15-C16  | 1.372(8) |
| C15-H15  | 0.95     | C16-C17  | 1.394(8) |
| C16-C18  | 1.510(8) | C17-H17  | 0.95     |
| C18-H18A | 0.99     | C18-H18B | 0.99     |

**Table S107.** Bond angles (°) for [ $\{\text{Cu}_3(\text{bpy})_2\}\text{Mo}_2\text{F}_2\text{O}_4(\text{H}_2\text{O})_2(1,3\text{-O}_3\text{PC}_8\text{H}_8\text{PO}_3)_2$ ] (**14**).

|           |            |           |            |
|-----------|------------|-----------|------------|
| O9-Mo1-O8 | 102.35(18) | O9-Mo1-F1 | 97.65(18)  |
| O8-Mo1-F1 | 96.31(15)  | O9-Mo1-O4 | 97.45(18)  |
| O8-Mo1-O4 | 89.09(16)  | F1-Mo1-O4 | 162.47(16) |
| O9-Mo1-O2 | 97.85(18)  | O8-Mo1-O2 | 158.63(16) |
| F1-Mo1-O2 | 87.79(15)  | O4-Mo1-O2 | 81.39(15)  |
| O9-Mo1-O7 | 174.57(17) | O8-Mo1-O7 | 80.98(16)  |
| F1-Mo1-O7 | 77.61(15)  | O4-Mo1-O7 | 86.84(15)  |
| O2-Mo1-O7 | 79.44(15)  | O5-Cu1-O5 | 180.0      |
| O5-Cu1-O3 | 91.10(16)  | O5-Cu1-O3 | 88.90(16)  |
| O5-Cu1-O3 | 88.90(16)  | O5-Cu1-O3 | 91.10(16)  |
| O3-Cu1-O3 | 180.0(2)   | O6-Cu2-O1 | 96.87(17)  |
| O6-Cu2-N1 | 171.76(18) | O1-Cu2-N1 | 89.95(18)  |
| O6-Cu2-N2 | 94.38(18)  | O1-Cu2-N2 | 154.79(17) |
| N1-Cu2-N2 | 81.17(19)  | O3-P1-O1  | 116.3(2)   |
| O3-P1-O2  | 112.2(2)   | O1-P1-O2  | 108.2(2)   |
| O3-P1-C11 | 107.3(2)   | O1-P1-C11 | 106.5(3)   |
| O2-P1-C11 | 105.7(2)   | O6-P2-O5  | 116.3(2)   |
| O6-P2-O4  | 111.9(2)   | O5-P2-O4  | 106.5(2)   |
| O6-P2-C18 | 106.8(2)   | O5-P2-C18 | 108.3(2)   |
| O4-P2-C18 | 106.7(2)   | P1-O1-Cu2 | 147.7(3)   |
| P1-O2-Mo1 | 141.1(2)   | P1-O3-Cu1 | 131.2(2)   |

|            |          |              |          |
|------------|----------|--------------|----------|
| P2-O4-Mo1  | 147.6(3) | P2-O5-Cu1    | 139.0(2) |
| P2-O6-Cu2  | 130.1(2) | Mo1-O7-H7C   | 124.(4)  |
| Mo1-O7-H7D | 107.(4)  | H7C-O7-H7D   | 109.(4)  |
| C1-N1-C5   | 120.2(5) | C1-N1-Cu2    | 124.4(4) |
| C5-N1-Cu2  | 115.3(4) | C10-N2-C6    | 119.3(5) |
| C10-N2-Cu2 | 126.3(4) | C6-N2-Cu2    | 114.1(4) |
| N1-C1-C2   | 121.0(6) | N1-C1-H1     | 119.5    |
| C2-C1-H1   | 119.5    | C3-C2-C1     | 118.6(6) |
| C3-C2-H2   | 120.7    | C1-C2-H2     | 120.7    |
| C2-C3-C4   | 120.1(6) | C2-C3-H3     | 120.0    |
| C4-C3-H3   | 120.0    | C5-C4-C3     | 118.5(6) |
| C5-C4-H4   | 120.7    | C3-C4-H4     | 120.7    |
| N1-C5-C4   | 121.6(6) | N1-C5-C6     | 114.3(5) |
| C4-C5-C6   | 124.0(5) | N2-C6-C7     | 121.3(6) |
| N2-C6-C5   | 114.5(5) | C7-C6-C5     | 124.2(5) |
| C8-C7-C6   | 119.4(6) | C8-C7-H7     | 120.3    |
| C6-C7-H7   | 120.3    | C9-C8-C7     | 119.0(5) |
| C9-C8-H8   | 120.5    | C7-C8-H8     | 120.5    |
| C8-C9-C10  | 119.4(6) | C8-C9-H9     | 120.3    |
| C10-C9-H9  | 120.3    | N2-C10-C9    | 121.6(6) |
| N2-C10-H10 | 119.2    | C9-C10-H10   | 119.2    |
| C12-C11-P1 | 114.8(4) | C12-C11-H11A | 108.6    |

|             |          |               |          |
|-------------|----------|---------------|----------|
| P1-C11-H11A | 108.6    | C12-C11-H11B  | 108.6    |
| P1-C11-H11B | 108.6    | H11A-C11-H11B | 107.5    |
| C13-C12-C15 | 118.0(5) | C13-C12-C11   | 120.3(5) |
| C15-C12-C11 | 121.7(5) | C14-C13-C12   | 120.0(5) |
| C14-C13-H13 | 120.0    | C12-C13-H13   | 120.0    |
| C17-C14-C13 | 120.8(5) | C17-C14-H14   | 119.6    |
| C13-C14-H14 | 119.6    | C16-C15-C12   | 122.3(5) |
| C16-C15-H15 | 118.9    | C12-C15-H15   | 118.9    |
| C15-C16-C17 | 118.8(5) | C15-C16-C18   | 122.6(5) |
| C17-C16-C18 | 118.6(5) | C14-C17-C16   | 120.1(6) |
| C14-C17-H17 | 119.9    | C16-C17-H17   | 119.9    |
| C16-C18-P2  | 113.8(4) | C16-C18-H18A  | 108.8    |
| P2-C18-H18A | 108.8    | C16-C18-H18B  | 108.8    |
| P2-C18-H18B | 108.8    | H18A-C18-H18B | 107.7    |

**Table S108.** Anisotropic atomic displacement parameters ( $\text{\AA}^2$ ) for  
 $[\{\text{Cu}_3(\text{bpy})_2\}\text{Mo}_2\text{F}_2\text{O}_4(\text{H}_2\text{O})_2(1,3\text{-O}_3\text{PC}_8\text{H}_8\text{PO}_3)_2]$  (**14**).

The anisotropic atomic displacement factor exponent takes the form:  $-2\pi^2 [ h^2 a^{*2} U_{11} + \dots + 2 h k a^* b^* U_{12} ]$

|     | $U_{11}$   | $U_{22}$   | $U_{33}$   | $U_{23}$    | $U_{13}$    | $U_{12}$    |
|-----|------------|------------|------------|-------------|-------------|-------------|
| Mo1 | 0.0201(3)  | 0.0162(3)  | 0.0103(3)  | 0.00119(19) | 0.00481(19) | 0.0009(2)   |
| Cu1 | 0.0079(4)  | 0.0123(5)  | 0.0071(4)  | 0.0002(3)   | -0.0006(3)  | -0.0003(3)  |
| Cu2 | 0.0125(3)  | 0.0152(4)  | 0.0058(3)  | 0.0003(3)   | -0.0007(2)  | -0.0011(3)  |
| P1  | 0.0096(6)  | 0.0131(7)  | 0.0070(6)  | 0.0004(5)   | -0.0018(5)  | -0.0009(5)  |
| P2  | 0.0091(6)  | 0.0130(7)  | 0.0063(6)  | 0.0007(5)   | -0.0015(5)  | -0.0001(5)  |
| F1  | 0.0153(16) | 0.0290(19) | 0.0131(16) | -0.0009(14) | -0.0023(13) | 0.0002(14)  |
| O1  | 0.0137(19) | 0.017(2)   | 0.0077(17) | -0.0016(15) | -0.0011(14) | -0.0025(16) |
| O2  | 0.0109(18) | 0.019(2)   | 0.0077(18) | 0.0015(15)  | -0.0022(14) | 0.0002(15)  |
| O3  | 0.0117(18) | 0.0139(19) | 0.0095(18) | 0.0034(15)  | -0.0010(14) | 0.0005(15)  |
| O4  | 0.0100(18) | 0.020(2)   | 0.0128(19) | 0.0018(16)  | -0.0015(14) | -0.0003(15) |
| O5  | 0.0101(18) | 0.015(2)   | 0.0074(17) | 0.0012(15)  | -0.0015(14) | -0.0022(15) |
| O6  | 0.0123(18) | 0.0146(19) | 0.0088(17) | -0.0014(15) | -0.0023(14) | 0.0025(15)  |
| O7  | 0.0097(18) | 0.020(2)   | 0.0123(19) | 0.0035(16)  | -0.0024(15) | 0.0004(16)  |
| O8  | 0.0075(17) | 0.0167(19) | 0.0048(16) | -0.0002(14) | -0.0035(13) | 0.0009(15)  |
| O9  | 0.017(2)   | 0.020(2)   | 0.018(2)   | 0.0019(17)  | 0.0000(16)  | -0.0026(16) |
| N1  | 0.014(2)   | 0.017(2)   | 0.008(2)   | 0.0017(18)  | 0.0018(17)  | 0.0034(18)  |
| N2  | 0.011(2)   | 0.018(2)   | 0.008(2)   | 0.0013(18)  | -0.0036(17) | 0.0041(18)  |
| C1  | 0.021(3)   | 0.019(3)   | 0.018(3)   | -0.004(2)   | 0.005(2)    | -0.001(2)   |



|     | <b>U<sub>11</sub></b> | <b>U<sub>22</sub></b> | <b>U<sub>33</sub></b> | <b>U<sub>23</sub></b> | <b>U<sub>13</sub></b> | <b>U<sub>12</sub></b> |
|-----|-----------------------|-----------------------|-----------------------|-----------------------|-----------------------|-----------------------|
| C2  | 0.025(3)              | 0.013(3)              | 0.029(3)              | -0.003(2)             | 0.009(3)              | 0.000(2)              |
| C3  | 0.029(3)              | 0.017(3)              | 0.027(3)              | 0.007(3)              | 0.015(3)              | 0.003(2)              |
| C4  | 0.026(3)              | 0.021(3)              | 0.014(3)              | 0.004(2)              | 0.008(2)              | 0.008(2)              |
| C5  | 0.017(3)              | 0.018(3)              | 0.009(2)              | 0.003(2)              | 0.002(2)              | 0.008(2)              |
| C6  | 0.011(3)              | 0.022(3)              | 0.011(2)              | 0.002(2)              | 0.000(2)              | 0.008(2)              |
| C7  | 0.017(3)              | 0.030(3)              | 0.007(2)              | 0.003(2)              | 0.001(2)              | 0.005(2)              |
| C8  | 0.014(3)              | 0.036(4)              | 0.011(3)              | -0.004(2)             | -0.003(2)             | 0.007(3)              |
| C9  | 0.012(3)              | 0.030(3)              | 0.016(3)              | -0.008(2)             | -0.001(2)             | 0.001(2)              |
| C10 | 0.013(3)              | 0.021(3)              | 0.013(3)              | -0.002(2)             | -0.002(2)             | 0.002(2)              |
| C11 | 0.018(3)              | 0.013(3)              | 0.017(3)              | 0.001(2)              | 0.001(2)              | 0.003(2)              |
| C12 | 0.018(3)              | 0.008(3)              | 0.015(3)              | -0.002(2)             | 0.002(2)              | 0.000(2)              |
| C13 | 0.027(3)              | 0.019(3)              | 0.011(3)              | 0.006(2)              | -0.003(2)             | -0.002(2)             |
| C14 | 0.019(3)              | 0.023(3)              | 0.021(3)              | 0.006(3)              | -0.010(2)             | -0.004(3)             |
| C15 | 0.012(3)              | 0.015(3)              | 0.010(2)              | -0.001(2)             | 0.001(2)              | 0.003(2)              |
| C16 | 0.015(3)              | 0.013(3)              | 0.011(3)              | -0.001(2)             | -0.001(2)             | 0.003(2)              |
| C17 | 0.013(3)              | 0.018(3)              | 0.021(3)              | 0.006(2)              | -0.004(2)             | -0.003(2)             |
| C18 | 0.013(3)              | 0.017(3)              | 0.011(3)              | -0.002(2)             | 0.000(2)              | -0.001(2)             |

**Table S109.** Hydrogen atomic coordinates and isotropic atomic displacement parameters ( $\text{\AA}^2$ ) for  $[\{\text{Cu}_3(\text{bpy})_2\}\text{Mo}_2\text{F}_2\text{O}_4(\text{H}_2\text{O})_2(1,3\text{-O}_3\text{PC}_8\text{H}_8\text{PO}_3)_2]$  (**14**).

|      | <b>x/a</b> | <b>y/b</b> | <b>z/c</b> | <b>U(eq)</b> |
|------|------------|------------|------------|--------------|
| H7C  | 0.482(4)   | -0.039(3)  | 0.923(4)   | 0.018        |
| H7D  | 0.646(4)   | -0.037(3)  | 0.939(4)   | 0.018        |
| H1   | 0.0311     | 0.3587     | 0.7469     | 0.023        |
| H2   | -0.1297    | 0.2950     | 0.8328     | 0.026        |
| H3   | -0.1133    | 0.3152     | 1.0087     | 0.028        |
| H4   | 0.0572     | 0.4001     | 1.0952     | 0.023        |
| H7   | 0.2343     | 0.4790     | 1.1647     | 0.022        |
| H8   | 0.3967     | 0.5732     | 1.2186     | 0.026        |
| H9   | 0.4901     | 0.6356     | 1.0950     | 0.024        |
| H10  | 0.4276     | 0.6008     | 0.9216     | 0.02         |
| H11A | 0.3425     | 0.2875     | 0.5287     | 0.02         |
| H11B | 0.4302     | 0.2884     | 0.6494     | 0.02         |
| H13  | 0.0334     | 0.2807     | 0.4843     | 0.024        |
| H14  | -0.1829    | 0.2241     | 0.5254     | 0.028        |
| H15  | 0.3051     | 0.2328     | 0.7688     | 0.015        |
| H17  | -0.1580    | 0.1748     | 0.6876     | 0.022        |
| H18A | -0.0191    | 0.1566     | 0.8578     | 0.017        |
| H18B | 0.1459     | 0.1955     | 0.9037     | 0.017        |
